# Supplementary material for: Cell Line-, Protein-, and Sialoglycosite-Specific Control of Flux-Based Sialylation in Human Breast Cells: Implications for Cancer Progression
Source: Front Chem. 2020 Feb 5;8:13. doi: 10.3389/fchem.2020.00013 (PMC7013041; doi:10.3389/fchem.2020.00013)
Supplement: Supplemental File S3 — Sialoglycosite analysis. Raw mass spectrometry data from SPEG experiments for protein abundance and identified peptide sequences containing sialoglycosites is provided. [file Data_Sheet_3.xlsx]

## Sheet: motif_peptide_raw
¶ log2(intensity) : this means log2 transforming intensity which was taken at the peak maximum over the elution and incldue all isotopic peaks and replacing missing value to half of lowest value
1887	GLPGGNASLPR	Q9NPC4	A4GALT	FAT1	19.4376	20.2646	1.77399	20.3481	19.381	19.2644	1.08418	19.9408	20.675	1.66347
4087	NLTNVLGTQSR	Q9NPC4	A4GALT	Lactosylceramide 4-alpha-galactosyltransferase	19.3022	20.0884	1.72453	20.3423	19.1166	19.2861	0.889151	19.6289	20.3123	1.60592		568421	0.0263677			0.0234449
5605	VFLQGYQLHLTSLCNGSK	O95477	ABCA1	ATP-binding cassette sub-family A member 1	17.8183	16.0817	0.300076	18.1774	22.0762	17.3861	25.8143	17.9996	16.7534	0.421557		4.42179e+06	0.205117			5.29495
990	EAFNETNQAIR	O95477	ABCA1	ATP-binding cassette sub-family A member 1	18.4994	16.5207	0.253718	22.3144	22.684	22.3545	1.25658	18.7649	19.6917	1.90105		6.73852e+06	0.312584			0.392787
2196	HPEDVQSSNGSVYTWR	O95477	ABCA1	ATP-binding cassette sub-family A member 1	18.0082	18.0962	1.0629	21.478	21.652	21.736	0.943438	17.2327	18.4901	2.39065		3.29535e+06	0.152864			0.144217
5254	TLNSTSPFPSK	O95477	ABCA1	ATP-binding cassette sub-family A member 1	18.1871	17.6904	0.708726	19.981	22.3181	22.4052	0.941413	17.7139	18.1017	1.3084		5.22899e+06	0.242561			0.22835
3430	LQDFLVDNETFSGFLYHNLSLPK	O95477	ABCA1	ATP-binding cassette sub-family A member 1	16.7376	19.6658	7.6116	23.9457	23.1566	23.7382	0.668222	18.0286	17.9842	0.969693		9.35042e+06	0.433745			0.289838
1055	EFCNLSLSER	Q86UK0	ABCA12	ATP-binding cassette sub-family A member 12	21.3727	21.1705	0.869224	17.4764	18.3886	16.9692	2.67474	20.833	21.6921	1.81391		343179	0.0159193			0.0425799
5472	TYSSQVIYNLTGQR	Q86UK0	ABCA12	ATP-binding cassette sub-family A member 12	21.7257	21.6365	0.940044	19.0581	16.9203	18.7725	0.27697	22.0479	22.7739	1.65405		124027	0.00575335			0.0015935
1542	FLTQNLSLPNSTAQALLAAR	Q9BZC7	ABCA2	ATP-binding cassette sub-family A member 2	17.6138	24.8968	155.74	21.1808	19.33	18.235	2.13613	25.9202	26.7801	1.81491		659037	0.0305712			0.0653041
5921	VSQQLGLDAPNGSDSSPQAPPPR	Q9BZC7	ABCA2	ATP-binding cassette sub-family A member 2	16.5052	21.7199	37.1348	19.0012	18.6348	18.3459	1.22171	18.348	18.7082	1.2836		407037	0.0188815			0.0230677
4884	SPANGSLGPTLNLSSGESR	Q9BZC7	ABCA2	ATP-binding cassette sub-family A member 2	24.5261	25.3459	1.76516	21.7653	21.9711	21.7862	1.13674	25.424	26.4481	2.03369		4.11112e+06	0.190705			0.216782
3126	LHPEALNLSLDELPPALR	Q9BZC7	ABCA2	ATP-binding cassette sub-family A member 2	23.1744	23.9051	1.65944	18.4406	18.9674	20.6628	0.308769	24.3792	24.6562	1.21167		512574	0.0237771			0.00734164
6153	YDNCSSSVLAAVVFEHPFNHSK	Q99758	ABCA3	ATP-binding cassette sub-family A member 3	18.3866	18.705	1.24695	19.242	18.7222	18.2885	1.35069	24.4546	19.2499	0.0271162		432458	0.0200607			0.0270959
6154	YDNCSSSVLAAVVFEHPFNHSKEPLPLAVK	Q99758	ABCA3	ATP-binding cassette sub-family A member 3	19.4927	17.451	0.242877	18.8895	17.7934	19.3538	0.339057	22.7856	23.9671	2.26812		227168	0.0105378			0.00357292
5318	TNVSLWK	Q8WWZ7	ABCA5	ATP-binding cassette sub-family A member 5	17.5399	18.6714	2.19086	19.2458	19.1451	17.5956	2.92716	18.6521	20.0772	2.68533		579761	0.0268938			0.0787224
2799	KPQDQGLNHTCNYYLQPEEDVTIGVWHTVPAVWWK	Q8N2K0	ABHD12	Monoacylglycerol lipase ABHD12	21.8738	18.0251	0.0694106	22.3118	16.3951	17.7364	0.394665	19.9974	23.1954	9.17686		86182.1	0.00399779			0.00157779
1205	ELYEPIWQNFTDPQLR	P12821	ACE	Angiotensin-converting enzyme;Angiotensin-converting enzyme, soluble form	17.1136	20.4749	10.2767	18.9612	18.7579	17.3706	2.61589	22.7723	22.8891	1.08433		443293	0.0205633			0.0537913
3452	LQLQALQQNGSSVLSEDK	Q9BYF1	ACE2	Angiotensin-converting enzyme 2;Processed angiotensin-converting enzyme 2	20.8325	20.2803	0.681979	18.2939	18.3116	16.7141	3.02618	18.6948	17.9248	0.586417		325343	0.0150919			0.0456709
3906	NESDKAPWPLSLPGCPHR	P11117	ACP2	Lysosomal acid phosphatase	19.8085	19.2532	0.680516	21.7054	21.6738	21.1781	1.41	22.0167	22.889	1.83058		3.34552e+06	0.155191			0.21882
4083	NLTLMATTSQLPK	P11117	ACP2	Lysosomal acid phosphatase	22.7462	22.9549	1.15565	22.3542	22.4837	22.3832	1.07214	24.117	24.7252	1.52436		5.865e+06	0.272064			0.291692
6219	YHGFLNTSYHR	P11117	ACP2	Lysosomal acid phosphatase	22.935	23.4841	1.46317	22.6287	22.5747	22.539	1.02505	24.1076	25.7256	3.06949		6.24686e+06	0.289778			0.297038
2790	KNLTLMATTSQLPK	P11117	ACP2	Lysosomal acid phosphatase	19.6285	16.5459	0.118044	19.4168	18.2362	18.8157	0.669196	20.1432	19.8834	0.835204		308776	0.0143234			0.00958516
1532	FLNESYK	P15309	ACPP	Prostatic acid phosphatase;PAPf39	16.8762	20.093	9.29722	18.2333	17.1617	17.2249	0.957139	17.0568	19.4035	5.08659		146618	0.00680126			0.00650975
639	DDDIAALVVDNGSGMCK	P60709	ACTB	Actin, cytoplasmic 1;Actin, cytoplasmic 1, N-terminally processed	25.3075	25.5355	1.17121	25.656	25.2896	26.6935	0.377906	25.4422	26.0149	1.4873		4.10136e+07	1.90253			0.718977
1036	EEEIAALVIDNGSGMCK	P63261	ACTG1	Actin, cytoplasmic 2;Actin, cytoplasmic 2, N-terminally processed	22.8509	22.8207	0.979285	22.5158	21.7719	23.1033	0.397382	21.3193	21.9015	1.49713		3.58092e+06	0.166111			0.0660095
2074	GYAFNHSADFETVR	P61160	ACTR2	Actin-related protein 2	22.3236	16.7086	0.0204041	23.1214	22.1461	22.8766	0.602695	18.4124	19.1721	1.69314		4.64131e+06	0.2153			0.12976
4005	NITAQLPTK	Q04771	ACVR1	Activin receptor type-1	19.5215	20.4273	1.87358	20.1468	19.8964	20.3354	0.737646	17.5612	17.7573	1.1456		975918	0.0452706			0.0333937
4002	NISQVLEK	O14672	ADAM10	Disintegrin and metalloproteinase domain-containing protein 10	22.1931	23.0486	1.80939	24.1073	24.1379	23.6726	1.3806	22.5145	23.6401	2.18192		1.846e+07	0.856318			1.18224
5065	TCIMEASTDFLPGLNFSNCSR	Q13444	ADAM15	Disintegrin and metalloproteinase domain-containing protein 15	21.6334	21.0288	0.657654	21.4034	21.5275	20.1103	2.67067	24.1771	25.6462	2.76849		3.0229e+06	0.140225			0.374495
4195	NTSWDNAGFK	P78536	ADAM17	Disintegrin and metalloproteinase domain-containing protein 17	19.8443	20.6136	1.70444	21.5217	21.7439	21.4025	1.26699	20.3792	21.672	2.45003		3.51209e+06	0.162918			0.206415
787	DLLGSGYTETYTAANGSEVTEQPR	P78325	ADAM8	Disintegrin and metalloproteinase domain-containing protein 8	18.1768	16.8487	0.398292	23.0638	23.7473	23.304	1.35971	18.2098	16.5546	0.317494		1.40815e+07	0.65321			0.888176
5939	VSYVLGATGHNFTLHLR	P78325	ADAM8	Disintegrin and metalloproteinase domain-containing protein 8	17.0041	18.2585	2.38568	21.1413	20.733	21.5467	0.568921	17.7053	18.8814	2.25965		1.74283e+06	0.0808459			0.0459949
3930	NFSSCSAEDFEK	Q13443	ADAM9	Disintegrin and metalloproteinase domain-containing protein 9	19.3948	20.4537	2.08334	22.7984	22.8172	22.5439	1.20857	21.7933	22.966	2.25433		7.39029e+06	0.342819			0.41432
2095	GYVEGVHNSSIALSDCFGLR	Q13443	ADAM9	Disintegrin and metalloproteinase domain-containing protein 9	17.1334	17.7392	1.52182	23.5078	22.9189	23.0445	0.916623	23.2236	23.675	1.36737		7.93006e+06	0.367857			0.337186
1878	GLLHLENASYGIEPLQNSSHFEHIIYR	Q13443	ADAM9	Disintegrin and metalloproteinase domain-containing protein 9	22.0562	23.2128	2.22931	25.2094	23.2148	24.0961	0.542878	24.6016	24.9186	1.24574		9.73534e+06	0.4516			0.245164
1698	GAEYVISPLPNASAPAAQR	Q8TE58	ADAMTS15	A disintegrin and metalloproteinase with thrombospondin motifs 15	17.1052	19.034	3.80738	21.6768	22.8482	22.488	1.2836	19.746	19.5817	0.892361		7.55081e+06	0.350265			0.449601
334	ANGTGYFYVLAPK	Q8TE58	ADAMTS15	A disintegrin and metalloproteinase with thrombospondin motifs 15	17.845	18.0827	1.17911	22.3883	22.9614	22.6459	1.24444	19.1686	21.7458	5.9678		8.16714e+06	0.378855			0.471463
1944	GPTFAPLPPVAPLHCAQTPYGCCQDNITAAR	O00468	AGRN	Agrin;Agrin N-terminal 110 kDa subunit;Agrin C-terminal 110 kDa subunit;Agrin C-terminal 90 kDa fragment;Agrin C-terminal 22 kDa fragment	18.6221	21.1378	5.71875	19.4412	19.2081	19.2835	0.949079	19.8713	21.3898	2.86493		605640	0.0280942			0.0266636
5192	TIICHVEGFPKPAIQWTITGSGSVINQTEESPYINGR	Q13740	ALCAM	CD166 antigen	18.1518	19.381	2.34437	22.8145	18.8533	17.566	2.44071	18.2037	24.1021	59.6479		473597	0.0219691			0.0536201
3058	LGDCISEDSYPDGNITWYR	Q13740	ALCAM	CD166 antigen	25.2438	26.4222	2.26326	27.3424	27.3659	26.4536	1.88204	25.5587	27.5396	3.94739		1.72964e+08	8.02342			15.1004
2411	IIISPEENVTLTCTAENQLER	Q13740	ALCAM	CD166 antigen	26.8806	27.8969	2.02272	28.2632	27.9651	27.7925	1.12709	27.1866	28.6564	2.76983		2.6202e+08	12.1545			13.6992
3372	LNLSENYTLSISNAR	Q13740	ALCAM	CD166 antigen	24.8953	25.5514	1.57582	26.8078	26.0237	25.9472	1.05446	25.7941	26.1497	1.27952		6.82204e+07	3.16459			3.33692
3870	NATVVWMK	Q13740	ALCAM	CD166 antigen	24.0014	24.7253	1.65164	24.4617	24.1239	24.5017	0.76961	24.6239	25.1411	1.43117		1.82817e+07	0.848048			0.652666
4268	PAIQWTITGSGSVINQTEESPYINGR	Q13740	ALCAM	CD166 antigen	23.0518	24.2224	2.25105	23.2042	22.5438	22.9592	0.749812	22.3958	22.9796	1.49879		6.11449e+06	0.283637			0.212674
863	DRLNLSENYTLSISNAR	Q13740	ALCAM	CD166 antigen	17.8154	17.0361	0.582649	20.9745	16.6709	19.9813	0.100802	18.2317	20.5507	4.98986		104338	0.00483998			0.000487881
5732	VLDEVTNGTVSVSK	Q86WK6	AMIGO1	Amphoterin-induced protein 1	20.4399	17.5525	0.135147	21.286	20.4894	20.2019	1.22052	19.5948	20.8158	2.33108		1.47205e+06	0.0682853			0.0833438
4476	QVLLLQDSFMNCSDSIINGSFR	Q86SJ2	AMIGO2	Amphoterin-induced protein 2	23.0125	23.9451	1.90871	17.4721	17.5429	17.238	1.23533	18.8857	20.3953	2.84731		190959	0.00885813			0.0109427
3286	LLNETVDVTINVSNFTVSR	Q86SJ2	AMIGO2	Amphoterin-induced protein 2	17.0182	21.4816	22.0606	17.7986	17.5603	18.339	0.582892	17.4773	18.9791	2.83196		193276	0.00896561			0.00522598
5586	VFENCSSAPALGLERPEEHLYALVGR	Q86WK7	AMIGO3	Amphoterin-induced protein 3	21.0786	16.7711	0.0505025	19.3535	17.8377	18.4134	0.670961	18.4575	19.5509	2.13376		234252	0.0108664			0.00729093
3550	LTDVETQVLNQTSR	Q15389	ANGPT1	Angiopoietin-1	17.1227	18.9623	3.57911	17.8461	17.5912	17.8784	0.819491	18.6321	20.1797	2.9233		197460	0.00915971			0.0075063
2492	ILNQTADMLQLASK	Q9UKU9	ANGPTL2	Angiopoietin-related protein 2	16.9952	17.7481	1.68518	19.9179	20.7436	20.8576	0.924023	17.5425	17.3357	0.866457		1.75568e+06	0.0814421			0.0752543
676	DFQDPDGIEGSENVTLCR	A1A5B4	ANO9	Anoctamin-9	22.14	22.8135	1.59494	18.2906	15.2745	17.7055	0.185437	18.812	21.1486	5.05111		39635.3	0.00183859			0.000340943
673	DFNETQLAR	Q9H6X2	ANTXR1	Anthrax toxin receptor 1	19.2619	20.0394	1.71416	23.1815	22.4347	22.7911	0.781111	19.9082	20.4591	1.465		5.66915e+06	0.262979			0.205416
2542	INDSVTLNEKPFSVEDTYLLCPAPILK	Q9H6X2	ANTXR1	Anthrax toxin receptor 1	20.2572	16.9432	0.100551	18.5027	17.031	18.5211	0.355988	17.736	21.8137	16.8853		133919	0.00621219			0.00221146
4144	NQSLSLLYK	Q06481	APLP2	Amyloid-like protein 2	19.3751	20.6088	2.35169	22.3909	22.2508	21.9493	1.23243	21.5916	21.5772	0.990068		4.99066e+06	0.231505			0.285313
4569	RNQSLSLLYK	Q06481	APLP2	Amyloid-like protein 2	23.164	24.0759	1.88152	25.9854	25.8738	25.6203	1.1921	24.5814	25.8075	2.33934		6.14879e+07	2.85228			3.4002
163	AGPNGTLFVADAYK	Q9HDC9	APMAP	Adipocyte plasma membrane-associated protein	27.4301	27.9928	1.47703	27.9329	28.1756	27.6232	1.46652	27.3666	28.4551	2.12653		3.0318e+08	14.0638			20.6249
4101	NMSFVNDLTVTQDGRK	Q9HDC9	APMAP	Adipocyte plasma membrane-associated protein	22.7133	21.78	0.523659	24.4923	24.6054	24.223	1.30351	23.5574	26.6644	8.61589		2.55249e+07	1.18404			1.54341
4100	NMSFVNDLTVTQDGR	Q9HDC9	APMAP	Adipocyte plasma membrane-associated protein	27.312	28.0513	1.66937	27.1637	27.612	27.3635	1.18797	27.5533	28.1462	1.50828		2.05135e+08	9.51575			11.3044
1249	EQNYSDDVLANMISEPR	P05067	APP	Amyloid beta A4 protein;N-APP;Soluble APP-alpha;Soluble APP-beta;C99;Beta-amyloid protein 42;Beta-amyloid protein 40;C83;P3(42);P3(40);C80;Gamma-secretase C-terminal fragment 59;Gamma-secretase C-terminal fragment 57;Gamma-secretase C-terminal fragment 50;C31	18.0893	18.7876	1.62259	18.4675	18.9075	18.4017	1.41991	16.6611	20.2312	11.877		491728	0.0228101			0.0323883
647	DDSSLPEYSAFNTSVHAAIR	P15848	ARSB	Arylsulfatase B	16.7735	19.2776	5.67295	22.1992	22.6084	21.2315	2.5971	18.5669	19.5619	1.99308		6.3945e+06	0.296626			0.770367
573	CTLIDALNVTR	P15848	ARSB	Arylsulfatase B	18.9358	19.9668	2.04344	20.8066	20.6149	20.4467	1.12366	19.651	21.4696	3.52739		1.60584e+06	0.0744914			0.0837027
4171	NSTFTYFTSDHGGHLEAR	P51689	ARSD	Arylsulfatase D	21.9773	19.0155	0.128354	18.3646	18.267	18.1419	1.09058	18.9712	22.9136	15.3738		315439	0.0146325			0.0159579
5789	VLQWTGASGGLPTNETTFAK	P51690	ARSE	Arylsulfatase E	17.5923	16.0616	0.346109	21.7538	18.603	21.5468	0.129965	16.7468	17.7979	2.07211		398163	0.0184699			0.00240045
4444	QSIGQNYSNVIANLR	Q6UWY0	ARSK	Arylsulfatase K	16.4047	16.6164	1.15805	19.6494	19.0811	19.3285	0.842413	17.952	18.1643	1.15853		554605	0.0257268			0.0216726
2446	ILAPAYFILGGNQSGEGCVITR	Q13510	ASAH1	Acid ceramidase;Acid ceramidase subunit alpha;Acid ceramidase subunit beta	24.8862	26.0582	2.25324	24.9184	23.894	21.4235	5.54236	27.684	27.9989	1.24393		1.55887e+07	0.723125			4.00782
5424	TVLENSTSYEEAK	Q13510	ASAH1	Acid ceramidase;Acid ceramidase subunit alpha;Acid ceramidase subunit beta	23.9939	23.87	0.917703	24.5215	24.4312	24.0569	1.29621	26.3786	27.2776	1.86477		2.26216e+07	1.04937			1.3602
5425	TVLENSTSYEEAKNLLTK	Q13510	ASAH1	Acid ceramidase;Acid ceramidase subunit alpha;Acid ceramidase subunit beta	17.0154	19.2322	4.64861	19.7993	19.5358	19.5391	0.997715	22.5829	19.6312	0.129256		760084	0.0352586			0.035178
5371	TSQENISFETMYDVLSTKPVLNK	Q13510	ASAH1	Acid ceramidase;Acid ceramidase subunit alpha;Acid ceramidase subunit beta	18.2436	17.545	0.61617	20.3294	16.2904	17.6217	0.39741	18.2129	23.7568	46.6531		80149.2	0.00371794			0.00147755
3660	LVQLFPNDTSLK	Q12797	ASPH	Aspartyl/asparaginyl beta-hydroxylase	24.8627	25.6474	1.72273	26.4478	26.6234	26.2452	1.29972	25.1009	26.5071	2.65038		1.03381e+08	4.79562			6.23296
286	ALMVLTEEPLLYIPPPPCQPLINTTESLR	P18850	ATF6	Cyclic AMP-dependent transcription factor ATF-6 alpha;Processed cyclic AMP-dependent transcription factor ATF-6 alpha	17.3623	19.0023	3.11666	19.1025	18.6711	18.6525	1.01298	18.4802	23.927	43.6164		417408	0.0193626	0.978894	1.37928	0.0196139	0.239198
3824	MSLVMPAMAPNETLSGR	Q99941	ATF6B	Cyclic AMP-dependent transcription factor ATF-6 beta;Processed cyclic AMP-dependent transcription factor ATF-6 beta	18.5784	17.4266	0.450063	18.7896	18.9613	18.6762	1.21849	19.1146	20.8976	3.44141		510411	0.0236768			0.0288501
1157	ELGGAIDFGAAYVLEQASSHIGNSTQATVR	Q6DD88	ATL3	Atlastin-3	20.9426	18.2123	0.150695	18.9554	22.3375	19.1327	9.22021	19.936	23.7197	13.7723		5.29978e+06	0.245844			2.26674
6300	YLQPLLAVQFTNLTMDTEIR	P05026	ATP1B1	Sodium/potassium-transporting ATPase subunit beta-1	26.9033	28.0587	2.22746	27.4469	25.7977	21.5686	18.7537	26.7836	27.6647	1.84178		5.83286e+07	2.70573			50.7423
3002	LEWLGNCSGLNDETYGYK	P05026	ATP1B1	Sodium/potassium-transporting ATPase subunit beta-1	28.1741	28.7188	1.45872	28.6928	28.4466	27.8517	1.51037	26.8867	28.1145	2.3421		3.6583e+08	16.97			25.631
3908	NESLETYPVMK	P05026	ATP1B1	Sodium/potassium-transporting ATPase subunit beta-1	22.1002	23.6	2.82804	23.2971	23.7715	23.2325	1.45297	21.7139	22.8904	2.26028		1.43197e+07	0.664259			0.965145
4089	NLTVCPDGALFEQK	P54709	ATP1B3	Sodium/potassium-transporting ATPase subunit beta-3	27.1726	28.1389	1.95382	28.0235	27.6709	27.5792	1.06563	27.6658	28.8	2.19497		2.13683e+08	9.91229			10.5628
3131	LHVGYLQPLVAVQVSFAPNNTGK	P54709	ATP1B3	Sodium/potassium-transporting ATPase subunit beta-3	23.4372	24.2992	1.81756	24.6738	23.0152	24.399	0.383208	24.4952	25.3814	1.8483		8.47746e+06	0.39325			0.150697
3000	LEVHSNGSVAYFNASQVTGPSIYSFHCEYVSSLSK	Q15904	ATP6AP1	V-type proton ATPase subunit S1	16.3386	18.005	3.17422	21.5475	17.6759	17.1933	1.39726	18.447	23.3112	29.1253		209400	0.00971357			0.0135724
3337	LNASLPALLLIR	Q15904	ATP6AP1	V-type proton ATPase subunit S1	24.683	25.1249	1.35839	24.4215	24.4638	24.4915	0.980983	24.8885	25.8873	1.99834		2.31386e+07	1.07335			1.05294
4432	QPVSPVIHPPVSYNDTAPR	Q15904	ATP6AP1	V-type proton ATPase subunit S1	25.0706	25.5131	1.35896	24.7659	24.3633	24.4183	0.962594	25.2155	25.7692	1.46785		2.15816e+07	1.00112			0.963675
2462	ILFWAQNFSVAYK	Q15904	ATP6AP1	V-type proton ATPase subunit S1	21.3902	21.8326	1.35886	21.2527	17.1873	21.4368	0.0525742	21.5606	22.5517	1.9877		149243	0.00692302			0.000363973
4297	PMFTYNWTEETLR	Q93050	ATP6V0A1	V-type proton ATPase 116 kDa subunit a isoform 1	24.7081	25.656	1.92906	22.7366	22.5798	22.5757	1.00285	25.699	26.2423	1.4573		6.26898e+06	0.290804			0.291631
3842	MVLWNDSVVR	Q9Y487	ATP6V0A2	V-type proton ATPase 116 kDa subunit a isoform 2	23.7726	24.3742	1.5174	23.4182	23.7144	23.4668	1.18723	23.0902	24.4818	2.62369		1.3764e+07	0.638482			0.758025
3909	NETIWYLK	O15342	ATP6V0E1	V-type proton ATPase subunit e 1	23.3675	23.9408	1.48792	24.4302	24.5095	24.0996	1.32859	24.1878	25.1833	1.99377		2.38833e+07	1.10789			1.47194
3910	NETIWYVR	Q8NHE4	ATP6V0E2	V-type proton ATPase subunit e 2	17.6693	18.6878	2.02581	19.2187	19.9326	19.3484	1.49921	18.8665	19.2467	1.30152		1.00072e+06	0.0464209			0.0695945
2300	IDSTGNVTNELR	O75882	ATRN	Attractin	17.0292	22.6674	49.8044	22.8166	22.9823	22.7369	1.18542	23.2728	24.6748	2.64268		8.28632e+06	0.384383			0.455656
760	DLDMFINASK	O75882	ATRN	Attractin	19.7726	22.0285	4.77632	20.7856	21.3619	21.2888	1.05197	22.3794	23.3746	1.99336		2.69509e+06	0.125019			0.131517
3967	NHSCSEGQISIFR	O75882	ATRN	Attractin	20.0047	21.1985	2.28754	20.5747	17.6308	20.1833	0.170459	18.6549	23.004	20.3803		202955	0.00941462			0.00160481
5589	VFHIHNESWVLLTPK	O75882	ATRN	Attractin	18.5509	19.9373	2.61426	21.2822	17.8184	20.7739	0.128916	18.3004	23.0163	26.2801		231139	0.010722			0.00138223
3949	NGSQAFVHWQEPR	P30530	AXL	Tyrosine-protein kinase receptor UFO	16.7629	18.1037	2.53292	23.3124	22.984	17.9353	33.0986	17.5404	17.7694	1.17202		8.29609e+06	0.384837			12.7376
748	DIVEYYNDSNGSHVLQGR	P25311	AZGP1	Zinc-alpha-2-glycoprotein	18.7427	19.3602	1.53421	18.3326	16.5922	17.0256	0.740515	24.7464	25.8455	2.14221		98798.4	0.00458303			0.0033938
627	DAYENLTAK	Q96L58	B3GALT6	Beta-1,3-galactosyltransferase 6	19.5446	19.7596	1.1607	17.9681	20.0275	18.0578	3.91687	20.1357	20.3113	1.12943		1.06876e+06	0.0495771			0.194187
4168	NSSWIFFCEEETR	Q6Y288	B3GALTL	Beta-1,3-glucosyltransferase	19.9108	20.8884	1.96919	21.6154	17.3013	21.1566	0.0690938	17.4032	20.7589	10.2369		161514	0.00749227			0.000517669
892	DTFFNLSLK	Q9NY97	B3GNT2	N-acetyllactosaminide beta-1,3-N-acetylglucosaminyltransferase 2	20.5543	20.99	1.35257	20.4382	20.7745	20.4405	1.2605	19.5816	20.8311	2.37759		1.79369e+06	0.0832052			0.10488
4256	NYSLLIDQPDK	Q9NY97	B3GNT2	N-acetyllactosaminide beta-1,3-N-acetylglucosaminyltransferase 2	17.2148	20.0643	7.20751	18.2624	17.346	17.2402	1.07609	18.1644	17.8754	0.818469		166597	0.00772804			0.00831607
570	CRNYSLLIDQPDK	Q9NY97	B3GNT2	N-acetyllactosaminide beta-1,3-N-acetylglucosaminyltransferase 2	19.0506	18.5042	0.684727	19.4454	18.4503	18.7524	0.811071	17.8444	18.2901	1.36197		358174	0.0166149			0.0134758
3523	LSNISHLNYCEPDLR	Q9NY97	B3GNT2	N-acetyllactosaminide beta-1,3-N-acetylglucosaminyltransferase 2	16.9051	24.091	145.603	23.0054	22.1383	22.8829	0.596833	22.4703	19.2176	0.104916		4.61628e+06	0.214139			0.127805
3410	LPLNFTHQTPPWR	Q76KP1	B4GALNT4	N-acetyl-beta-glucosaminyl-glycoprotein 4-beta-N-acetylgalactosaminyltransferase 1	19.282	19.6563	1.29621	19.3517	18.4878	18.3449	1.10412	19.7984	19.5734	0.855595		367606	0.0170524			0.0188279
4283	PGPLSTANHTALR	O60512	B4GALT3	Beta-1,4-galactosyltransferase 3;N-acetyllactosamine synthase;Beta-N-acetylglucosaminylglycopeptide beta-1,4-galactosyltransferase;Beta-N-acetylglucosaminyl-glycolipid beta-1,4-galactosyltransferase	18.7014	15.5493	0.112492	19.6654	18.9604	17.7972	2.23954	20.4315	19.3208	0.463069		510093	0.023662			0.052992
948	DVYSNLSHLPGAPGGPPAPQGLPYCPER	O60512	B4GALT3	Beta-1,4-galactosyltransferase 3;N-acetyllactosamine synthase;Beta-N-acetylglucosaminylglycopeptide beta-1,4-galactosyltransferase;Beta-N-acetylglucosaminyl-glycolipid beta-1,4-galactosyltransferase	23.6301	24.4867	1.81077	23.9329	23.2054	23.449	0.844635	21.4664	27.189	52.8049		9.67212e+06	0.448667			0.37896
4436	QQLAYGIYVIHQAGNGTFNR	O60512	B4GALT3	Beta-1,4-galactosyltransferase 3;N-acetyllactosamine synthase;Beta-N-acetylglucosaminylglycopeptide beta-1,4-galactosyltransferase;Beta-N-acetylglucosaminyl-glycolipid beta-1,4-galactosyltransferase	16.9292	21.1346	18.4481	17.6973	17.5801	17.9657	0.765461	22.5502	24.2718	3.29802		195946	0.00908951			0.00695766
1161	ELGPLYTNITADIGTDPR	O60512	B4GALT3	Beta-1,4-galactosyltransferase 3;N-acetyllactosamine synthase;Beta-N-acetylglucosaminylglycopeptide beta-1,4-galactosyltransferase;Beta-N-acetylglucosaminyl-glycolipid beta-1,4-galactosyltransferase	17.638	22.6689	32.6928	22.1996	17.7654	21.6761	0.0664909	17.6648	24.0567	83.9757		222802	0.0103353			0.0006872
6085	WEGELGTDLVSIPHGPNVTVR	P56817	BACE1	Beta-secretase 1	19.0988	17.1798	0.264438	17.7804	18.5027	22.4865	0.0632058	18.23	23.6614	43.1533		371422	0.0172294			0.001089
5349	TQNFTLLVQGSPELK	P50895	BCAM	Basal cell adhesion molecule	26.3089	26.9173	1.52457	23.6832	23.5662	23.3242	1.18263	27.1946	28.2687	2.10541		1.24203e+07	0.576151			0.681374
5793	VLSLPLNSSAVVNCSVHGLPTPALR	P50895	BCAM	Basal cell adhesion molecule	28.185	28.4073	1.16659	25.6061	25	24.9947	1.00368	29.3838	25.4109	0.0636851		33554432	1.55651			1.56224
6118	WSDIWNATK	P06276	BCHE	Cholinesterase	18.1054	18.0399	0.955614	18.1954	17.7294	16.2497	2.78891	17.0002	22.5243	46.0172		217311	0.0100805			0.0281137
716	DIAINISR	Q6QNY1	BLOC1S2	Biogenesis of lysosome-related organelles complex 1 subunit 2	18.1821	18.341	1.11644	17.8972	19.0357	17.7598	2.4215	17.1842	19.7208	5.8022		537424	0.0249298			0.0603676
3354	LNGSITSPGWPK	P13497	BMP1	Bone morphogenetic protein 1	16.2699	18.4079	4.40151	20.6214	20.729	20.4469	1.21596	16.7678	19.4261	6.31289		1.738e+06	0.080622			0.0980334
2416	IILNFTSLDLYR	P13497	BMP1	Bone morphogenetic protein 1	17.0748	17.6625	1.50285	20.0395	20.0547	20.1382	0.943765	18.7987	18.2455	0.681507		1.0891e+06	0.0505207			0.0476797
1256	ERFDNETFR	P18075	BMP7	Bone morphogenetic protein 7	19.0933	19.1755	1.05863	16.9004	19.5835	17.1739	5.31327	18.2434	18.7797	1.45025		785635	0.0364438			0.193636
5074	TDCDSSTTSLCSFPVANVSLTK	Q96G97	BSCL2	Seipin	24.2	18.9191	0.0257212	22.2362	22.7715	22.3344	1.35388	25.1811	25.6712	1.40454		7.15986e+06	0.33213			0.449664
2483	ILLTCSLNDSATEVTGHR	P35613	BSG	Basigin	23.3445	28.3857	32.927	25.9142	25.5318	25.5895	0.960795	28.5522	29.2932	1.67133		4.85107e+07	2.2503			2.16208
1776	GFQDVEAQAATCNHTVMALMASLDAEK	Q10589	BST2	Bone marrow stromal antigen 2	17.1625	21.8566	25.886	16.8379	23.8117	23.6576	1.11273	24.614	27.5609	7.7109		1.47243e+07	0.683029			0.760025
4233	NVTHLLQQELTEAQK	Q10589	BST2	Bone marrow stromal antigen 2	24.36	24.5469	1.13832	28.2863	28.0195	28.1166	0.93491	28.4131	29.6726	2.39413		2.72088e+08	12.6216			11.8
1556	FNDTEVLQR	P43251	BTD	Biotinidase	22.4051	22.9178	1.42672	21.5428	21.2163	17.6366	11.9563	21.1105	22.422	2.48199		2.43637e+06	0.113017			1.35127
937	DVQIIVFPEDGIHGFNFTR	P43251	BTD	Biotinidase	23.7993	25.3183	2.86592	23.5091	22.8339	23.0354	0.869646	23.1455	24.5026	2.5617		7.47634e+06	0.34681			0.301602
4099	NMSCSINNTLLGQK	Q7KYR7	BTN2A1	Butyrophilin subfamily 2 member A1	22.6714	23.2402	1.48329	23.8922	24.2029	24.2838	0.945468	21.301	22.9647	3.16828		1.93107e+07	0.895781			0.846932
2010	GSVALVIHNITAQENGTYR	Q7KYR7	BTN2A1	Butyrophilin subfamily 2 member A1	23.3803	24.301	1.89303	25.8515	25.4255	26.0131	0.665449	22.4963	23.8115	2.48837		4.50649e+07	2.09046			1.39109
114	AFALNCSWR	F2Z333	C1orf233	Fibronectin type-III domain-containing transmembrane protein C1orf233	20.6162	21.11	1.40815	16.5551	17.0742	17.6712	0.661127	17.6787	18.1754	1.41098		137990	0.00640102			0.00423189
5287	TMFPNLTDVR	P06681	C2	Complement C2;Complement C2b fragment;Complement C2a fragment	17.9668	18.9	1.90951	20.2668	20.6834	20.6254	1.04102	18.5946	18.2796	0.803851		1.68393e+06	0.0781136			0.081318
6335	YPSCGGLLQSPIDLHSDILQYDASLTPLEFQGYNLSANK	O43570	CA12	Carbonic anhydrase 12	26.5757	26.6559	1.05716	20.7981	20.0996	16.4301	12.7242	27.1406	26.2298	0.53189		1.12352e+06	0.0521177			0.663155
2837	KYPSCGGLLQSPIDLHSDILQYDASLTPLEFQGYNLSANK	O43570	CA12	Carbonic anhydrase 12	27.8237	27.3482	0.719217	23.3434	21.7516	18.8203	7.62797	28.6562	29.3866	1.6591		3.53089e+06	0.16379			1.24938
2613	ISDNNTEFLLNFNEFIDR	P54289	CACNA2D1	Voltage-dependent calcium channel subunit alpha-2/delta-1;Voltage-dependent calcium channel subunit alpha-2-1;Voltage-dependent calcium channel subunit delta-1	16.0296	17.866	3.57118	21.241	18.2414	17.7967	1.36103	20.3319	19.3963	0.522825		309891	0.0143751			0.019565
4714	SFSGVLDCGNCSR	P54289	CACNA2D1	Voltage-dependent calcium channel subunit alpha-2/delta-1;Voltage-dependent calcium channel subunit alpha-2-1;Voltage-dependent calcium channel subunit delta-1	17.2761	17.1666	0.926909	21.5753	21.3522	20.9903	1.28512	19.9221	21.094	2.25308		2.67703e+06	0.124181			0.159587
889	DTAVEGEEIEVNCTAMASKPATTIR	Q9BY67	CADM1	Cell adhesion molecule 1	16.5597	19.5846	8.13927	18.9696	18.2053	17.1857	2.02736	17.7822	25.5582	219.184		302233	0.0140199			0.0284233
888	DTAVEGEEIEVNCTAMASK	Q9BY67	CADM1	Cell adhesion molecule 1	23.2117	24.5728	2.56881	16.1675	18.3865	17.8594	1.44103	23.6252	25.0423	2.67048		342679	0.0158961			0.0229068
1594	FQLLNFSSSELK	Q9BY67	CADM1	Cell adhesion molecule 1	16.3127	26.2825	1002.79	19.0201	18.4534	18.3684	1.06069	27.234	17.7838	0.00142957		358944	0.0166506			0.0176611
5916	VSLTNVSISDEGR	Q9BY67	CADM1	Cell adhesion molecule 1	25.5312	26.5503	2.02665	19.1112	18.8886	18.818	1.05015	27.3492	28.7181	2.58274		485328	0.0225132			0.0236424
83	AEAVGETLTLPGLVSADNGTYTCEASNK	Q8NFZ8	CADM4	Cell adhesion molecule 4	24.7593	25.2842	1.43883	18.1632	22.036	22.0509	0.989725	18.778	25.0775	78.7659		4.30028e+06	0.19948			0.197431
4458	QTLFFNGTR	Q8NFZ8	CADM4	Cell adhesion molecule 4	23.1123	23.6594	1.46115	20.9714	21.0952	21.2465	0.900439	22.1817	23.4114	2.34518		2.24021e+06	0.103918			0.0935718
3872	NATYGYVLDDPDPDDGFNYK	O43852	CALU	Calumenin	27.0151	27.5206	1.41962	28.4486	28.394	28.1073	1.21985	26.8313	28.3894	2.94466		3.52733e+08	16.3625			19.9597
3806	MNITSIAPLLEK	Q96PB1	CASD1	CAS1 domain-containing protein 1	17.004	20.4545	10.9321	19.1177	18.6333	18.5157	1.08493	18.339	22.3009	15.583		406614	0.0188619			0.0204638
1175	ELLESNFTLVGDDGTNK	Q96A33	CCDC47	Coiled-coil domain-containing protein 47	18.14	18.4977	1.28138	17.6305	19.198	16.4983	6.49667	17.0427	17.8055	1.69678		601414	0.0278982			0.181246
5341	TQDEILFSNSTR	Q6YHK3	CD109	CD109 antigen	21.1467	22.5886	2.71678	17.6187	19.318	16.4184	7.46219	18.7913	19.3492	1.47212		653578	0.030318			0.226239
2562	INYTVPQSGTFK	Q6YHK3	CD109	CD109 antigen	21.5566	23.2982	3.34406	17.9246	16.2258	17.6926	0.361784	19.2918	19.712	1.33811		76639.5	0.00355513			0.00128619
6223	YHQPGHEAVTSAVDQLQQEFHCCGSNNSQDWR	P48509	CD151	CD151 antigen	26.5017	27.7936	2.4485	28.7028	27.2541	27.4689	0.861666	26.6139	28.1294	2.85898		1.60067e+08	7.42514			6.39799
4199	NTTQHPNVTTLAPISNVTSAPVTSLPLVTTPAPETCEGR	Q04900	CD164	Sialomucin core protein 24	17.7817	24.0538	77.2841	18.4447	21.9911	19.1206	7.31319	23.658	18.622	0.0304799		4.16851e+06	0.193368			1.41413
1537	FLSNDTVQLNVK	P20273	CD22	B-cell receptor CD22	16.7488	19.1644	5.33541	21.9751	22.2258	22.0338	1.14235	18.3117	17.5144	0.575425		4.90493e+06	0.227528			0.259916
3887	NCTLSIHPVHLNDSGQLGLR	P20273	CD22	B-cell receptor CD22	18.8898	19.8123	1.8954	23.1272	22.8077	22.8879	0.945927	19.1039	18.8628	0.8461		7.34179e+06	0.340569			0.322153
2943	LDPEENHTAELVIPELPLAHPPNER	Q9NZQ7	CD274	Programmed cell death 1 ligand 1	18.4029	17.219	0.44016	21.6406	17.9542	16.8193	2.19603	16.9084	18.6496	3.34313		253953	0.0117803			0.0258699
821	DLYVVEYGSNMTIECK	Q9NZQ7	CD274	Programmed cell death 1 ligand 1	16.7099	18.6544	3.84904	21.489	22.7087	22.0185	1.61351	17.5939	18.8434	2.37759		6.85488e+06	0.317982			0.513067
3033	LFNVTSTLR	Q9NZQ7	CD274	Programmed cell death 1 ligand 1	16.4839	17.3045	1.76614	25.1968	25.4216	24.9881	1.35051	19.0185	20.0667	2.06795		4.49432e+07	2.08481			2.81555
4546	RLDPEENHTAELVIPELPLAHPPNER	Q9NZQ7	CD274	Programmed cell death 1 ligand 1	18.1483	16.9618	0.439367	22.9168	22.3723	22.9191	0.684537	18.2892	18.9246	1.55337		5.42917e+06	0.251847			0.172398
2560	INTTTNEIFYCTFR	Q9NZQ7	CD274	Programmed cell death 1 ligand 1	18.9188	18.1431	0.584105	19.374	22.1454	24.8791	0.15034	18.9786	18.9099	0.953497		4.63906e+06	0.215195			0.0323524
2090	GYPEAEVFWQDGQGVPLTGNVTTSQMANEQGLFDVHSVLR	Q5ZPR3	CD276	CD276 antigen	26.6818	27.7392	2.08118	17.6183	23.3452	17.4281	60.4261	20.9643	25.7111	26.8491		1.06563e+07	0.49432			29.8698
6009	VVLGANGTYSCLVR	Q5ZPR3	CD276	CD276 antigen	29.7931	25.3943	0.0474056	26.2044	26.4015	25.9864	1.33339	27.532	28.2613	1.65783		8.86428e+07	4.11194			5.48282
5046	TALFPDLLAQGNASLR	Q5ZPR3	CD276	CD276 antigen	29.067	29.7694	1.62721	25.7915	25.548	25.643	0.936272	27.148	27.983	1.78386		4.90585e+07	2.27571			2.13069
3891	NCTSYGVLDISK	P16671	CD36	Platelet glycoprotein 4	24.2491	24.8089	1.47406	20.4066	16.3472	16.2555	1.06563	22.9505	23.6322	1.60403		83367.6	0.00386723			0.00412102
4566	RNLSYWESHCDMINGTDAASFPPFVEK	P16671	CD36	Platelet glycoprotein 4	22.4959	23.6657	2.24981	18.6942	16.0001	18.6108	0.16372	21.4119	22.3567	1.92492		65540.5	0.00304028			0.000497753
135	AFNSTLPTMAQMEK	P16070	CD44	CD44 antigen	26.4426	27.0508	1.52436	28.2871	28.5305	28.4059	1.09021	21.4401	24.4138	7.85548		3.87736e+08	17.9862			19.6086
1787	GFYLDGSDTIVCDSNSTWDPPVPK	P15529	CD46	Membrane cofactor protein	16.9178	16.0964	0.565893	17.0617	17.3482	17.1497	1.1475	25.9189	26.8011	1.84318		166851	0.00773983			0.00888149
3970	NHTWLPVSDDACYR	P15529	CD46	Membrane cofactor protein	23.9124	24.5843	1.59317	24.0413	23.5557	23.5218	1.02378	24.8107	24.6755	0.910544		1.23303e+07	0.571973			0.585572
2081	GYFYIPPLATHTICDRNHTWLPVSDDACYR	P15529	CD46	Membrane cofactor protein	24.5332	24.502	0.978606	25.5379	17.4046	22.9438	0.0215048	25.7917	27.7744	3.95232		173503	0.0080484			0.000173079
4639	SDAVSHTGNYTCEVTELTR	Q08722	CD47	Leukocyte surface antigen CD47	17.5666	18.2835	1.64365	28.5938	27.7145	27.6604	1.03821	24.513	26.0553	2.91258		2.2024e+08	10.2164			10.6068
4973	SVEFTFCNDTVVIPCFVTNMEAQNTTEVYVK	Q08722	CD47	Leukocyte surface antigen CD47	22.6735	24.7696	4.27552	18.3544	17.1476	22.1703	0.0307621	19.5169	17.9858	0.346013		145192	0.00673511			0.000207187
4173	NSTSIYFK	P19256	CD58	Lymphocyte function-associated antigen 3	21.4456	22.435	1.98536	21.7474	21.5616	21.5576	1.00278	20.0912	20.188	1.0694		3.0952e+06	0.143579			0.143978
5062	TAVNCSSDFDACLITK	P13987	CD59	CD59 glycoprotein	28.9095	30.0036	2.1348	30.4992	30.5259	30.2103	1.24453	29.0407	30.1583	2.16986		1.54601e+09	71.7157			89.2523
521	CCGAANYTDWEK	P08962	CD63	CD63 antigen	28.4365	28.6771	1.18148	26.9463	26.2222	25.7968	1.34294	27.1576	27.7287	1.48566		7.82832e+07	3.63138			4.87674
5866	VPDSCCINVTVGCGINFNEK	P08962	CD63	CD63 antigen	27.6928	28.3251	1.55003	25.8672	24.8239	24.9845	0.894653	26.2802	25.2995	0.506734		2.96988e+07	1.37766			1.23253
800	DLQAPLGQSFSCSNSSIILSPAVHLDLLSLR	P34810	CD68	Macrosialin	17.6998	16.2885	0.375973	27.1775	25.2495	25.1437	1.07609	16.7873	22.9893	73.6187		3.98893e+07	1.85038			1.99117
1286	ETIGDYTWTNGSQPCVHLQAQIQIR	P34810	CD68	Macrosialin	18.0355	16.7827	0.419633	22.5479	17.7611	18.2868	0.694622	17.6823	18.5421	1.81479		222139	0.0103045			0.00715773
3735	MATPLLMQALPMGALPQGPMQNATK	P04233	CD74	HLA class II histocompatibility antigen gamma chain	16.6948	16.9746	1.21403	18.9211	24.1689	23.8723	1.22825	17.3703	17.8117	1.35792		1.8861e+07	0.874917			1.07461
1810	GHHNCSESLELEDPSSGLGVTK	P04233	CD74	HLA class II histocompatibility antigen gamma chain	16.7623	17.208	1.36197	23.512	22.6704	23.5445	0.545594	19.2856	19.4989	1.15934		6.67529e+06	0.309652			0.168944
6209	YGNMTEDHVMHLLQNADPLK	P04233	CD74	HLA class II histocompatibility antigen gamma chain	17.4488	17.8713	1.34025	26.2481	25.3554	26.9886	0.322372	22.0221	22.9849	1.94909		4.29275e+07	1.99131			0.641943
524	CCGWVSFYNWTDNAELMNRPEVTYPCSCEVK	P27701	CD82	CD82 antigen	16.8379	16.5946	0.844811	18.4844	21.2337	20.9553	1.21285	22.6696	24.4196	3.36359		2.46593e+06	0.114389			0.138736
966	DYNSSREDSLQDAWDYVQAQVK	P27701	CD82	CD82 antigen	20.8245	17.6398	0.109979	27.892	27.2146	27.4063	0.875573	26.9636	25.6253	0.395486		1.55744e+08	7.2246			6.32567
6083	WCPQNSSCVNATACR	P48960	CD97	CD97 antigen;CD97 antigen subunit alpha;CD97 antigen subunit beta	22.5787	22.5269	0.964732	25.214	24.8726	24.6392	1.1756	19.0083	17.7886	0.429372		3.07184e+07	1.42496			1.67518
349	ANSTSDSVFTETPSPVLK	Q9UKI2	CDC42EP3	Cdc42 effector protein 3	18.3924	18.0942	0.813266	22.289	21.52	20.9578	1.47652	17.8335	20.2322	5.27328		3.00722e+06	0.139498			0.205972
4421	QNISVTLR	Q9H5V8	CDCP1	CUB domain-containing protein 1	17.0017	17.4764	1.38963	24.3675	24.8136	24.383	1.34779	22.3535	19.0667	0.102465		2.94875e+07	1.36786			1.84359
2377	IGTFCSNGTVSR	Q9H5V8	CDCP1	CUB domain-containing protein 1	17.2518	17.4218	1.12506	25.3682	25.3125	24.9234	1.30958	23.455	24.1491	1.61787		4.16698e+07	1.93297			2.53137
1270	ESNITVLIK	Q9H5V8	CDCP1	CUB domain-containing protein 1	18.2746	17.6057	0.628986	25.3148	25.444	25.425	1.01326	23.8326	24.0684	1.17756		4.56465e+07	2.11744			2.14551
4228	NVSGFSIANR	Q9H5V8	CDCP1	CUB domain-containing protein 1	17.298	18.5257	2.34193	24.5978	24.3541	24.4481	0.936921	22.688	23.9788	2.44664		2.14444e+07	0.994758			0.93201
1888	GLPSLTSVSWNISVPR	Q9H5V8	CDCP1	CUB domain-containing protein 1	17.5596	16.9987	0.677879	26.2609	25.7368	25.8641	0.915543	24.2977	24.712	1.33265		5.59176e+07	2.59389			2.37482
3436	LQFQVLVQHPQNESNK	Q9H5V8	CDCP1	CUB domain-containing protein 1	17.2518	18.6946	2.71848	27.0829	25.9476	26.3279	0.768278	25.071	25.8375	1.70114		6.47151e+07	3.00199			2.30636
3466	LQQHTHEKPCNTSFSYLVASAIPSQDLYFGSFCPGGSIK	Q9H5V8	CDCP1	CUB domain-containing protein 1	16.3058	18.3831	4.22017	25.5702	23.5599	24.0246	0.724622	22.831	24.5078	3.19718		1.23662e+07	0.57364			0.415672
241	ALDRDEVGNSSHVSFQGPLGPDANFTVQDNR	Q86UP0	CDH24	Cadherin-24	17.6409	21.1284	11.2161	19.7801	19.4081	18.0202	2.61697	19.3832	19.7027	1.2479		695697	0.0322718			0.0844545
4477	QVLNITDK	P22223	CDH3	Cadherin-3	21.9775	21.9523	0.982684	17.2969	18.3765	17.0244	2.55283	22.2154	21.7136	0.706225		340312	0.0157863			0.0402998
5572	VETVVANLTVMDR	P55283	CDH4	Cadherin-4	19.0264	17.3637	0.315847	22.6773	22.8858	22.4795	1.32528	18.9099	18.7768	0.91187		7.75019e+06	0.359514			0.476457
5401	TTVTGDKDSVNLTCSTNDTGISIR	P13688	CEACAM1	Carcinoembryonic antigen-related cell adhesion molecule 1	17.8863	21.7216	14.2738	19.5323	17.142	17.4692	0.797082	18.1842	20.2006	4.04573		144629	0.00670902			0.00534764
5274	TLTLFNVTRNDTASYK	P06731	CEACAM5	Carcinoembryonic antigen-related cell adhesion molecule 5	24.1264	25.2511	2.18056	19.5577	17.2329	17.3302	0.934781	18.6034	18.8017	1.14735		154035	0.00714534			0.00667932
622	DAVAFTCEPEAQNTTYLWWVNGQSLPVSPR	P06731	CEACAM5	Carcinoembryonic antigen-related cell adhesion molecule 5	24.2008	25.5637	2.57202	17.1128	17.6508	17.7773	0.916051	19.7433	19.1972	0.684869		205788	0.00954604			0.00874466
6070	VYPELPKPSISSNNSKPVEDK	P06731	CEACAM5	Carcinoembryonic antigen-related cell adhesion molecule 5	24.9444	25.8365	1.85588	18.2221	17.4822	18.0372	0.680657	18.759	18.2845	0.719716		183091	0.00849316			0.00578093
5273	TLTLFNVTR	P06731	CEACAM5	Carcinoembryonic antigen-related cell adhesion molecule 5	27.5405	28.5871	2.06566	17.575	17.6538	18.2664	0.654017	21.2222	21.1641	0.960528		206216	0.00956591			0.00625627
5209	TITVSAELPKPSISSNNSKPVEDK	P06731	CEACAM5	Carcinoembryonic antigen-related cell adhesion molecule 5	26.3918	27.0166	1.542	17.794	17.0753	17.8571	0.581641	19.9355	19.6411	0.815411		138095	0.0064059			0.00372593
5747	VLGGAWDVFQLNESSGVVSTR	Q9NYQ6	CELSR1	Cadherin EGF LAG seven-pass G-type receptor 1	19.2344	21.657	5.36136	19.3856	17.952	17.7756	1.13006	21.6209	22.314	1.61675		253566	0.0117623			0.0132921
726	DIGNYSCAAQGTQTGSK	Q9NYQ6	CELSR1	Cadherin EGF LAG seven-pass G-type receptor 1	19.2937	19.6035	1.23954	18.5834	17.2153	17.1355	1.05687	17.3994	21.6366	18.8592		152167	0.0070587			0.00746014
3118	LHGLHLSNITVGGIPGPAGGVAR	Q9HCU4	CELSR2	Cadherin EGF LAG seven-pass G-type receptor 2	23.4496	23.851	1.32079	19.0203	18.3062	18.5061	0.870611	21.2523	22.4645	2.31691		324127	0.0150355			0.0130901
5991	VVDAVDGWMLNSSAIR	Q5T4B2	CERCAM	Probable inactive glycosyltransferase 25 family member 3	18.3309	17.6644	0.630033	18.0121	17.1789	18.3497	0.444175	16.5972	20.3279	13.2756		148376	0.00688283			0.00305718
3690	LWLPVNLTWADLEDR	Q96G23	CERS2	Ceramide synthase 2	23.1919	26.0361	7.18108	18.7778	23.2279	23.1686	1.04196	16.8005	24.8455	264.111		9.82414e+06	0.455719			0.474841
3691	LWLPVNLTWADLEDRDGR	Q96G23	CERS2	Ceramide synthase 2	25.4936	26.4396	1.92652	26.1558	25.202	25.2146	0.991304	26.1452	28.0765	3.81399		3.85974e+07	1.79044			1.77488
1679	FWLPPNVTWTELEDRDGR	Q9HA82	CERS4	Ceramide synthase 4	18.9521	18.6163	0.792345	18.0159	17.7052	15.7146	3.97402	19.1475	21.9775	7.11074		213696	0.00991287			0.0393939
1678	FWLPPNVTWTELEDR	Q9HA82	CERS4	Ceramide synthase 4	21.5028	22.0276	1.43873	20.1244	19.5042	19.5656	0.958334	21.8953	22.0022	1.07691		743617	0.0344947			0.0330574
1676	FWLPENVSWADLEGPADGYGYPR	Q8N5B7	CERS5	Ceramide synthase 5	21.9815	22.417	1.35238	23.0385	18.215	20.2764	0.239583	21.8024	23.5091	3.26413		304272	0.0141145			0.00338159
1677	FWLPHNVTWADLK	Q6ZMG9	CERS6	Ceramide synthase 6	23.3947	23.4008	1.00424	19.0199	18.1605	17.798	1.28565	18.8045	24.3391	46.3533		292992	0.0135912			0.0174736
2926	LDFLMFNYSVPSYLK	Q9NPF2	CHST11	Carbohydrate sulfotransferase 11	17.0532	16.4948	0.679055	17.4086	22.1366	17.4939	24.98	19.3276	22.3972	8.39541		4.61085e+06	0.213887			5.34288
1762	GFCANSSLAFPTK	Q9NRB3	CHST12	Carbohydrate sulfotransferase 12	18.0223	22.0799	16.6517	17.7559	21.7223	16.019	52.1032	21.1264	23.4473	4.99644		3.4599e+06	0.160497			8.3624
3695	LYANHTSLPASAR	Q9NRB3	CHST12	Carbohydrate sulfotransferase 12	19.9491	20.2765	1.25475	20.2664	20.729	20.3131	1.33413	20.6312	22.0199	2.61843		1.738e+06	0.080622			0.10756
359	APDTANLTTAALFR	Q9NS84	CHST7	Carbohydrate sulfotransferase 7	19.3439	19.5833	1.1805	20.3731	20.6058	20.314	1.22417	19.3205	20.4028	2.11741		1.59575e+06	0.074023			0.0906165
1584	FPSNLSGAVGEAVSR	Q9NS84	CHST7	Carbohydrate sulfotransferase 7	16.5666	16.6451	1.05592	20.7147	17.5856	20.1926	0.16414	17.1437	18.4478	2.4693		196695	0.00912423			0.00149765
4090	NLTVYTGLWVK	P56749	CLDN12	Claudin-12	18.6901	18.7821	1.06585	19.9513	18.8324	19.564	0.602236	19.4389	21.4726	4.09454		466785	0.0216531			0.0130403
6313	YNGTVGLWR	Q9NY35	CLDND1	Claudin domain-containing protein 1	21.7469	22.2077	1.3763	23.7338	24.3348	17.6011	106.425	22.243	23.7757	2.89327		2.11595e+07	0.981539			104.461
2058	GVTFNVTTVDTK	O00299	CLIC1	Chloride intracellular channel protein 1	23.5964	20.1727	0.0931888	25.1408	23.8198	24.9433	0.458979	23.0461	21.7028	0.394118		1.48072e+07	0.686874			0.315261
4337	QDNETGIYYETWNVK	O75503	CLN5	Ceroid-lipofuscinosis neuronal protein 5	21.4347	21.8391	1.32354	22.2553	22.0213	19.2419	6.86567	24.0766	25.1169	2.05666		4.25669e+06	0.197458			1.35568
2341	IFLYSGEPTYLGNETSVFGPTGNK	O75503	CLN5	Ceroid-lipofuscinosis neuronal protein 5	22.0983	22.5324	1.35107	23.6363	22.3738	22.2581	1.0835	25.9287	26.8858	1.9414		5.43482e+06	0.252109			0.27316
978	DYYPINESLASLPLR	O96005	CLPTM1	Cleft lip and palate transmembrane protein 1	27.2249	28.0811	1.81026	27.2311	27.7956	27.2932	1.41657	26.8899	28.1236	2.35169		2.32975e+08	10.8072			15.3091
1184	ELPGVCNETMMALWEECKPCLK	P10909	CLU	Clusterin;Clusterin beta chain;Clusterin alpha chain	24.2045	24.7574	1.46703	21.2718	21.6144	20.7913	1.7692	26.8115	27.5327	1.64855		3.21057e+06	0.148931			0.26349
3792	MLNTSSLLEQLNEQFNWVSR	P10909	CLU	Clusterin;Clusterin beta chain;Clusterin alpha chain	17.6763	15.8776	0.287433	17.8751	18.171	17.9384	1.17495	25.1832	21.2675	0.0662608		295132	0.0136905			0.0160856
2882	LANLTQGEDQYYLR	P10909	CLU	Clusterin;Clusterin beta chain;Clusterin alpha chain	26.2206	26.5654	1.26997	23.9236	23.7758	23.7653	1.0073	28.5621	29.4338	1.82982		1.43625e+07	0.666242			0.671108
4390	QLEEFLNQSSPFYFWMNGDR	P10909	CLU	Clusterin;Clusterin beta chain;Clusterin alpha chain	17.2121	23.1014	59.2729	17.9874	17.101	17.8083	0.612465	24.9842	25.9689	1.9789		140577	0.00652104			0.00399391
3573	LTLQPVDNSTISLQMGTNK	Q15417	CNN3	Calponin-3	16.4524	19.5197	8.38203	25.9506	23.5012	22.4295	2.10191	24.2523	26.4745	4.66604		1.18732e+07	0.550768			1.15767
3017	LFGPGFANSSWSWVAPEGAGCR	Q8NE01	CNNM3	Metal transporter CNNM3	20.9155	22.4806	2.95898	21.6139	18.1349	16.4129	3.29893	19.2993	23.5518	19.0603		287838	0.0133522			0.0440479
1925	GNTSGVLVVLTK	Q6P4Q7	CNNM4	Metal transporter CNNM4	24.7027	25.589	1.84843	17.4422	22.0638	16.9065	35.6863	24.7221	25.8206	2.14132		4.38395e+06	0.203361			7.25722
3705	LYGYSLGNISSNLISFTEVDDAETLHK	Q6P4Q7	CNNM4	Metal transporter CNNM4	18.0027	18.6307	1.54542	17.1694	21.5355	18.3903	8.84707	18.2006	26.4831	311.373		3.03971e+06	0.141005			1.24748
817	DLVVQQLVNVSR	Q6P4Q7	CNNM4	Metal transporter CNNM4	25.0112	25.5074	1.41049	23.1545	23.2996	23.1064	1.1433	25.0043	26.3269	2.50116		1.03247e+07	0.47894			0.547571
6019	VVMDIPYELWNETSAEVADLK	Q9BT09	CNPY3	Protein canopy homolog 3	25.6854	26.0444	1.28254	26.0036	25.2726	25.4394	0.890816	25.0933	26.028	1.91149		4.05332e+07	1.88024			1.67495
6020	VVMDIPYELWNETSAEVADLKK	Q9BT09	CNPY3	Protein canopy homolog 3	17.3161	17.7866	1.38559	19.0829	23.0087	23.4209	0.751477	21.8609	24.0175	4.45863		8.43935e+06	0.391482			0.29419
6349	YQLGTSPYVYQLTTRPVTDGQPHSINITR	P78357	CNTNAP1	Contactin-associated protein 1	19.5865	18.094	0.355396	23.5929	22.9878	16.1742	112.486	22.3751	19.0553	0.100148		8.31797e+06	0.385852			43.4028
1813	GHNSTFFGNVNESAVVR	P78357	CNTNAP1	Contactin-associated protein 1	17.7819	17.2502	0.691739	23.4491	23.308	17.8233	44.7774	18.014	19.9332	3.78213		1.0385e+07	0.481737			21.571
5526	VDGQLVNLTLVEGR	P78357	CNTNAP1	Contactin-associated protein 1	16.349	17.4991	2.21929	23.3462	23.6811	19.4431	18.8697	22.5804	23.2777	1.62147		1.345e+07	0.623913			11.7731
4313	PVTDGQPHSINITR	P78357	CNTNAP1	Contactin-associated protein 1	17.7812	18.7171	1.91308	19.1914	16.8861	16.4089	1.39204	18.0687	19.5306	2.75471		121122	0.00561857			0.00782127
934	DVNFTLDGYVQR	P78357	CNTNAP1	Contactin-associated protein 1	16.7288	16.7308	1.00139	22.8653	22.9794	22.6044	1.29684	21.6435	22.1726	1.44303		8.26968e+06	0.383611			0.497483
335	ANHSLDVSFYFR	P78357	CNTNAP1	Contactin-associated protein 1	18.3187	16.9913	0.398486	20.8043	19.488	19.7279	0.846804	19.6675	20.1518	1.39891		735314	0.0341095			0.0288841
993	EAGNITTDGYEILGK	Q99715	COL12A1	Collagen alpha-1(XII) chain	17.9116	18.361	1.36547	23.6175	23.3859	23.2016	1.13627	25.5981	27.4731	3.66802		1.09612e+07	0.508464			0.57775
3782	MLEAYNLTEK	Q99715	COL12A1	Collagen alpha-1(XII) chain	17.7242	18.5792	1.80876	21.3382	21.6488	21.4667	1.13453	23.9306	25.8557	3.79763		3.28805e+06	0.152525	1.61929	3.79421	0.173045	0.657998
4719	SFVQLWNDTVPTESLAR	P39060	COL18A1	Collagen alpha-1(XVIII) chain;Endostatin	18.9178	18.5688	0.785128	19.3171	17.467	16.9017	1.4797	19.0435	22.3206	9.69405		181172	0.00840415			0.0124356
4236	NVTLILDCK	P20908	COL5A1	Collagen alpha-1(V) chain	16.8287	20.6335	13.9752	22.9439	22.2609	22.3372	0.948487	16.8635	17.6463	1.72047		5.02572e+06	0.233132			0.221123
6059	VYCNFTAGGSTCVFPDK	P20908	COL5A1	Collagen alpha-1(V) chain	20.958	21.6059	1.56689	18.8927	20.7839	22.5325	0.29759	18.0109	18.2273	1.16183		1.80542e+06	0.0837491			0.0249229
4561	RNFTAADWGQSR	P12109	COL6A1	Collagen alpha-1(VI) chain	17.0875	16.8074	0.823534	19.7986	19.6061	19.2746	1.25832	17.194	18.3214	2.18465		798039	0.0370192			0.046582
4230	NVTAQICIDK	P12109	COL6A1	Collagen alpha-1(VI) chain	17.2408	19.1217	3.68305	17.907	21.3859	21.172	1.15982	19.0658	18.8351	0.852221		2.7403e+06	0.127116			0.147432
3932	NFTAADWGQSR	P12109	COL6A1	Collagen alpha-1(VI) chain	17.6586	18.1812	1.43654	20.9191	20.9987	20.8178	1.13359	18.2833	18.7037	1.3383		2.09526e+06	0.0971945			0.110179
4104	NMTLFSDLVAEK	P12110	COL6A2	Collagen alpha-2(VI) chain	17.7349	16.8128	0.52774	21.5031	21.6483	21.6075	1.02868	19.2602	19.9179	1.57757		3.28691e+06	0.152472			0.156846
321	AMNTSQVEALGIQMLPGYR	Q8NBJ5	COLGALT1	Procollagen galactosyltransferase 1	24.2173	24.0327	0.879893	25.4014	26.1453	25.4888	1.57625	24.5507	25.7917	2.36362		7.42198e+07	3.44288			5.42686
4951	STCPCNFTLYYEVAAR	Q8IZJ3	CPAMD8	C3 and PZP-like alpha-2-macroglobulin domain-containing protein 8	17.4447	16.5909	0.553325	18.2675	18.0862	18.5782	0.711039	20.2459	21.6732	2.68943		278284	0.012909			0.00917878
2070	GWQAEEGPLFHNQTSVTVDGR	Q8IZJ3	CPAMD8	C3 and PZP-like alpha-2-macroglobulin domain-containing protein 8	17.9229	17.3728	0.682973	18.5784	16.2047	17.715	0.351038	22.3985	23.5347	2.19801		75526.7	0.00350351			0.00122987
1835	GILNATISVAEINHPVTTYK	O75976	CPD	Carboxypeptidase D	22.453	23.2409	1.72656	25.502	24.9736	24.5912	1.30351	24.4664	25.5098	2.06108		3.2946e+07	1.52829			1.99214
4676	SEGAIQVNFTLVR	O75976	CPD	Carboxypeptidase D	21.3742	22.0967	1.65004	24.9313	24.2821	23.9547	1.25475	23.9735	24.8083	1.78361		2.04005e+07	0.946332			1.18741
873	DSITGSGLENATISVAGINHNITTGR	O75976	CPD	Carboxypeptidase D	24.8176	25.4168	1.51488	27.6162	27.4226	27.1573	1.20189	26.8018	28.0517	2.37825		1.79898e+08	8.34503			10.0298
1915	GNETIVNLIHSTR	P16870	CPE	Carboxypeptidase E	20.8392	21.5693	1.65875	18.3502	17.9601	17.0191	1.91986	21.6519	23.1876	2.89929		254993	0.0118286			0.0227092
4320	QAIHVGNQTFNDGTIVEK	Q9H3G5	CPVL	Probable serine carboxypeptidase CPVL	17.3343	18.4155	2.1158	17.449	17.2802	17.1883	1.06577	19.1808	22.9756	13.8787		159169	0.00738349			0.00786912
3210	LLDGDLTSDPSYFQNVTGCSNYYNFLR	Q9H3G5	CPVL	Probable serine carboxypeptidase CPVL	17.6459	18.4831	1.78658	17.1153	18.6546	21.4819	0.140896	22.3987	18.3503	0.060438		412662	0.0191424			0.00269709
1939	GPILPLQANLTR	O43889	CREB3	Cyclic AMP-responsive element-binding protein 3;Processed cyclic AMP-responsive element-binding protein 3	17.9792	18.6229	1.56233	19.6193	20.5795	20.0521	1.44133	17.4014	18.9132	2.85166		1.56692e+06	0.0726858			0.104764
774	DLGPNTTIK	Q96BA8	CREB3L1	Cyclic AMP-responsive element-binding protein 3-like protein 1;Processed cyclic AMP-responsive element-binding protein 3-like protein 1	16.4666	18.3783	3.76252	19.1783	19.6757	19.4151	1.19798	18.9369	17.077	0.275495		837483	0.0388489			0.0465401
2699	IVTPEEYYNVTVQ	O75629	CREG1	Protein CREG1	15.9009	24.2066	316.421	23.789	23.5815	17.7265	57.8803	24.4605	18.3944	0.0149253		1.25527e+07	0.582293			33.7033
5827	VNETEMDIAK	O75629	CREG1	Protein CREG1	19.6368	20.5015	1.82096	20.369	20.354	20.1489	1.15277	21.3688	22.7914	2.68068		1.34018e+06	0.0621681			0.0716653
3864	NASHLVCSACFGPCAR	Q96HD1	CRELD1	Cysteine-rich with EGF-like domain protein 1	20.3218	20.2834	0.973734	16.862	20.9008	16.439	22.0361	17.7675	18.6333	1.82235		1.9578e+06	0.0908177			2.00127
3905	NESCGGTFGIYGTCDR	Q9NZV1	CRIM1	Cysteine-rich motor neuron 1 protein;Processed cysteine-rich motor neuron 1 protein	17.1914	18.0431	1.80463	22.262	20.5269	20.6036	0.948224	19.859	21.3249	2.76236		1.51082e+06	0.0700835			0.0664548
5773	VLNASTLALALANLNGSR	O75462	CRLF1	Cytokine receptor-like factor 1	24.4744	24.2797	0.873755	17.6321	18.129	18.1046	1.01706	23.5987	24.6504	2.07297		286664	0.0132977			0.0135245
4275	PEAVQFFNVTTLQK	O75718	CRTAP	Cartilage-associated protein	17.9889	21.3925	10.5824	23.1486	23.092	22.6866	1.32446	20.616	20.6946	1.05599		8.94097e+06	0.414751			0.54932
3883	NCSAAPQPEPAAGLASYPELR	O75718	CRTAP	Cartilage-associated protein	21.8166	22.6978	1.84191	26.3666	26.0175	25.9989	1.01298	23.0125	24.3187	2.47289		6.79279e+07	3.15102			3.19191
903	DTWGLSDEHFQPRPEAVQFFNVTTLQK	O75718	CRTAP	Cartilage-associated protein	18.0041	24.2	73.3081	26.9164	25.9819	26.2064	0.855892	17.633	17.4537	0.883131		6.62722e+07	3.07421			2.63119
5289	TMNLSWDCQENTTFSK	P15509	CSF2RA	Granulocyte-macrophage colony-stimulating factor receptor subunit alpha	16.5694	16.3175	0.83979	22.3979	22.6891	22.5109	1.13147	21.7062	22.1508	1.36094		6.76238e+06	0.313691			0.354933
2052	GVNASAVVNVTVR	Q6UVK1	CSPG4	Chondroitin sulfate proteoglycan 4	18.003	17.1785	0.564678	17.1607	19.2582	19.4457	0.878126	16.948	17.1751	1.17048		627041	0.029087			0.025542
4374	QINSSISGNLWDK	Q01459	CTBS	Di-N-acetylchitobiase	16.323	22.9501	98.8453	18.0135	22.8727	22.2843	1.50358	23.1405	23.8038	1.5837		7.68013e+06	0.356264			0.535671
4375	QINSSISGNLWDKDQR	Q01459	CTBS	Di-N-acetylchitobiase	18.9895	19.7158	1.65439	21.136	16.976	17.7288	0.593451	20.8893	23.2495	5.13442		128910	0.00597982			0.00354873
1682	FYATNDTEVAQSNFEALQDFFR	P10619	CTSA	Lysosomal protective protein;Lysosomal protective protein 32 kDa chain;Lysosomal protective protein 20 kDa chain	25.9907	27.298	2.47478	27.5244	26.49	26.1767	1.24255	28.6465	27.7487	0.536705		9.42507e+07	4.37207			5.43251
1905	GLVSGGLYESHVGCRPYSIPPCEHHVNGSRPPCTGEGDTPK	P07858	CTSB	Cathepsin B;Cathepsin B light chain;Cathepsin B heavy chain	17.8126	18.478	1.58601	19.8976	19.2374	17.8705	2.57916	16.677	22.8905	74.2079		618065	0.0286706			0.0739461
4570	RNTTWQAGHNFYNVDMSYLK	P07858	CTSB	Cathepsin B;Cathepsin B light chain;Cathepsin B heavy chain	17.7083	18.5376	1.77682	21.8603	21.5135	21.8286	0.803795	22.1429	22.7315	1.50379		2.9937e+06	0.138871			0.111624
4315	PYSIPPCEHHVNGSRPPCTGEGDTPK	P07858	CTSB	Cathepsin B;Cathepsin B light chain;Cathepsin B heavy chain	19.5772	17.2426	0.198251	19.6185	17.7829	20.3383	0.170117	20.9041	21.6682	1.69831		225521	0.0104614			0.00177966
5980	VTTYCNETMTGWVHDVLGR	P53634	CTSC	Dipeptidyl peptidase 1;Dipeptidyl peptidase 1 exclusion domain chain;Dipeptidyl peptidase 1 heavy chain;Dipeptidyl peptidase 1 light chain	24.7562	25.6622	1.87384	25.7326	25.6481	25.1752	1.3879	21.8905	25.0111	8.6975		5.25833e+07	2.43922			3.38538
933	DVNCSVMGPQEK	P53634	CTSC	Dipeptidyl peptidase 1;Dipeptidyl peptidase 1 exclusion domain chain;Dipeptidyl peptidase 1 heavy chain;Dipeptidyl peptidase 1 light chain	19.9493	20.2143	1.20164	17.6745	20.5067	20.4368	1.04964	16.9895	19.1003	4.31931		1.48981e+06	0.069109			0.0725399
2513	ILTNNSQTPILSPQEVVSCSQYAQGCEGGFPYLIAGK	P53634	CTSC	Dipeptidyl peptidase 1;Dipeptidyl peptidase 1 exclusion domain chain;Dipeptidyl peptidase 1 heavy chain;Dipeptidyl peptidase 1 light chain	17.5149	25.6349	278.204	17.3288	18.2025	18.5324	0.795592	17.0336	17.781	1.67876		301647	0.0139927			0.0111325
3955	NGTSFDIHYGSGSLSGYLSQDTVSVPCQSASSASALGGVK	P07339	CTSD	Cathepsin D;Cathepsin D light chain;Cathepsin D heavy chain	17.5332	26.0471	365.544	25.6205	23.8712	17.7627	68.9988	18.6247	18.0316	0.662917		1.53443e+07	0.711787			49.1125
1997	GSLSYLNVTRK	P07339	CTSD	Cathepsin D;Cathepsin D light chain;Cathepsin D heavy chain	17.6003	17.9859	1.3064	18.6455	18.492	17.5577	1.91096	16.5217	19.8946	10.3596		368678	0.0171021			0.0326815
1996	GSLSYLNVTR	P07339	CTSD	Cathepsin D;Cathepsin D light chain;Cathepsin D heavy chain	30.599	30.6964	1.06984	29.4179	29.4189	29.0071	1.33034	30.5487	31.6396	2.13007		7.17747e+08	33.2946			44.2933
6068	VYINDSVELSQNEQK	Q9UBX1	CTSF	Cathepsin F	19.1083	21.0894	3.94794	22.2178	20.5965	21.9389	0.394364	24.9923	26.5577	2.9596		1.58549e+06	0.0735474			0.0290044
6370	YSVANDTGFVDIPK	P07711	CTSL	Cathepsin L1;Cathepsin L1 heavy chain;Cathepsin L1 light chain	26.0408	26.6461	1.5213	26.899	27.006	26.3599	1.56493	25.0053	25.9886	1.97698		1.34777e+08	6.252			9.78396
4724	SGDASINVTNLQLSDIGTYQCK	P78310	CXADR	Coxsackievirus and adenovirus receptor	18.7893	19.9556	2.24435	22.3731	22.2529	17.4783	27.3715	23.3243	22.0865	0.424019		4.99793e+06	0.231843			6.34587
3885	NCSTITLQNITR	Q14118	DAG1	Dystroglycan;Alpha-dystroglycan;Beta-dystroglycan	25.7222	26.6514	1.90422	24.736	25.2215	24.7995	1.33978	26.2978	26.2585	0.973127		3.91226e+07	1.81481			2.43145
1991	GSIVVEWTNNTLPLEPCPK	Q14118	DAG1	Dystroglycan;Alpha-dystroglycan;Beta-dystroglycan	17.6277	18.9822	2.55708	16.474	18.5235	19.1691	0.639227	17.6063	21.0152	10.6214		376816	0.0174796			0.0111734
2858	LAFAFGDRNCSTITLQNITR	Q14118	DAG1	Dystroglycan;Alpha-dystroglycan;Beta-dystroglycan	22.6542	23.4556	1.74279	23.0564	21.7469	22.5628	0.568054	23.7381	25.2604	2.87249		3.5194e+06	0.163257			0.0927389
3052	LGANGSHIPQTSSVFSIEVYPEDHSELQSVR	Q14118	DAG1	Dystroglycan;Alpha-dystroglycan;Beta-dystroglycan	18.1717	23.7517	47.8352	16.7968	17.675	23.564	0.0168746	18.4744	25.6002	139.662		209269	0.00970752			0.000163811
5558	VELIGCQITQGNDSLVWR	Q8N8Z6	DCBLD1	Discoidin, CUB and LCCL domain-containing protein 1	21.0493	22.4813	2.69821	18.5211	17.0733	16.6829	1.31076	17.8598	21.5379	12.8002		137904	0.00639703			0.00838495
1177	ELLLNTSEVTVR	Q8N8Z6	DCBLD1	Discoidin, CUB and LCCL domain-containing protein 1	22.2987	23.5364	2.35822	21.4323	20.2449	20.2319	1.00905	21.1386	22.0836	1.92519		1.24257e+06	0.0576401			0.0581619
3355	LNGSLATFSTDQELR	P98153	DGCR2	Integral membrane protein DGCR2/IDD	21.9762	22.7168	1.67087	22.1803	22.1751	22.0268	1.10826	22.2847	23.5009	2.32334		4.73555e+06	0.219671			0.243453
1399	FDINDTIR	Q96F81	DISP1	Protein dispatched homolog 1	18.0079	17.4029	0.657471	18.4365	17.8765	17.7108	1.12171	19.0463	20.0208	1.96496		240637	0.0111626			0.0125212
5415	TVGILPSNCSDIWQVLNVNQIAFPGPAGPSFNSTEDHSK	O00115	DNASE2	Deoxyribonuclease-2-alpha	23.1615	25.2701	4.31273	18.6037	17.0297	18.2498	0.429253	25.4256	27.2106	3.44618		133798	0.0062066			0.0026642
1811	GHHVSQEPWNSSITLTSQAGAVFQSFAK	O00115	DNASE2	Deoxyribonuclease-2-alpha	16.9785	18.0523	2.10497	18.3474	16.7522	18.738	0.252473	23.9354	24.7118	1.71285		110386	0.00512056			0.0012928
2925	LDFIILNETK	P27487	DPP4	Dipeptidyl peptidase 4;Dipeptidyl peptidase 4 membrane form;Dipeptidyl peptidase 4 soluble form	20.3245	20.593	1.20455	20.954	19.861	19.8352	1.01804	16.6097	18.2658	3.15163		952263	0.0441733			0.0449703
4564	RNLSASVIAVTIQGGAHHLDLR	Q9UHL4	DPP7	Dipeptidyl peptidase 2	16.5983	18.13	2.89126	19.4302	18.2083	17.3623	1.79751	21.0819	22.1376	2.07873		302862	0.0140491			0.0252533
233	ALAGLVYNASGSEHCYDIYR	Q9UHL4	DPP7	Dipeptidyl peptidase 2	25.6096	26.5428	1.90951	24.6519	24.0556	24.0046	1.03598	26.4956	27.6776	2.26891		1.74364e+07	0.808835			0.837939
4060	NLSASVIAVTIQGGAHHLDLR	Q9UHL4	DPP7	Dipeptidyl peptidase 2	19.6254	20.8158	2.28216	19.5637	17.8202	18.6731	0.553671	21.5836	22.4906	1.87514		231427	0.0107354			0.00594387
2590	IQILPNSSLLIR	Q8TD84	DSCAML1	Down syndrome cell adhesion molecule-like protein 1	18.1449	18.0742	0.952176	17.274	17.2454	17.1153	1.09437	19.0026	20.2501	2.3743		155376	0.00720752			0.00788769
897	DTGELNVTSILDR	Q14126	DSG2	Desmoglein-2	24.1777	24.756	1.49309	22.0701	22.2292	21.7147	1.4285	23.4185	23.3163	0.931611		4.9165e+06	0.228065			0.325791
2539	INATDADEPNTLNSK	Q14126	DSG2	Desmoglein-2	24.5522	25.1336	1.4963	23.1027	17.4307	23.3094	0.0169955	24.0872	21.5672	0.174343		176670	0.00819533			0.000139284
2177	HLLENSTASVSEAERK	P42892	ECE1	Endothelin-converting enzyme 1	17.7121	16.8214	0.539352	20.7288	21.6599	18.4627	9.17177	17.4571	22.0935	24.8711		3.31344e+06	0.153703			1.40973
2176	HLLENSTASVSEAER	P42892	ECE1	Endothelin-converting enzyme 1	24.5303	25.0397	1.42346	26.0694	25.7549	25.454	1.23191	24.2816	25.373	2.13081		5.66236e+07	2.62664			3.23579
4457	QTECMVEQYSNYSVNGEPVNGR	P42892	ECE1	Endothelin-converting enzyme 1	17.7974	21.8445	16.531	19.2277	18.8004	18.5022	1.22961	16.9527	16.9254	0.981255		456546	0.0211781			0.0260408
3080	LGGWNITGPWAK	P42892	ECE1	Endothelin-converting enzyme 1	24.7858	24.9299	1.10504	25.8427	25.0846	25.0878	0.997784	24.3422	25.2064	1.82033		3.55809e+07	1.65052			1.64686
1437	FFNFSWR	P42892	ECE1	Endothelin-converting enzyme 1	22.7016	23.1447	1.35952	23.7136	22.8338	23.3009	0.723417	22.1804	23.2894	2.15696		7.47582e+06	0.346786			0.250871
4587	RQTECMVEQYSNYSVNGEPVNGR	P42892	ECE1	Endothelin-converting enzyme 1	17.662	18.1738	1.42583	18.0204	17.5832	18.2883	0.6134	19.545	22.8599	9.9514		196368	0.00910906			0.0055875
3242	LLGGGDEEAIRPQMQQILDFETALANITIPQEK	P42892	ECE1	Endothelin-converting enzyme 1	25.1039	25.8195	1.64217	26.2235	23.271	25.1192	0.277739	23.6079	19.6464	0.0641903		1.01221e+07	0.469539			0.130409
1338	EYLEQISTLINTTDR	P42892	ECE1	Endothelin-converting enzyme 1	26.2021	26.7723	1.48473	27.7546	23.7248	26.8342	0.115872	25.7771	26.4696	1.61608		1.38636e+07	0.643101			0.0745172
3292	LLPAFNTTSGLPYPR	Q9BZQ6	EDEM3	ER degradation-enhancing alpha-mannosidase-like protein 3	23.6026	24.5101	1.87579	23.5983	23.6361	23.0027	1.55122	24.4125	25.5805	2.247		1.30369e+07	0.604753			0.938103
5571	VETGVLKPGMVVTFAPVNVTTEVK	Q5VTE0	EEF1A1P5;EEF1A1	Putative elongation factor 1-alpha-like 3;Elongation factor 1-alpha 1	15.931	17.3597	2.69204	24.8411	24.0838	23.8852	1.14758	17.9621	19.5551	3.01676		1.77806e+07	0.824801			0.946529
4280	PGMVVTFAPVNVTTEVK	Q5VTE0	EEF1A1P5;EEF1A1	Putative elongation factor 1-alpha-like 3;Elongation factor 1-alpha 1	20.0113	16.3362	0.0782861	24.2722	23.5615	23.4211	1.10221	20.5582	20.4694	0.940305		1.23799e+07	0.574277			0.632974
5830	VNFTVDQIR	P13639	EEF2	Elongation factor 2	18.4309	15.7881	0.160117	18.1421	21.1704	17.9339	9.42505	17.9588	17.8912	0.954224		2.36007e+06	0.109478			1.03184
6046	VWINITEMNK	O75071	EFCAB14	EF-hand calcium-binding domain-containing protein 14	16.3045	18.0486	3.34986	17.9352	17.8537	17.469	1.30559	17.406	23.0306	49.3371		236864	0.0109876			0.0143453
2970	LEGMNETVSNLTQR	O75071	EFCAB14	EF-hand calcium-binding domain-containing protein 14	21.5197	22.0084	1.40318	20.5927	21.8057	21.7208	1.06061	22.3131	23.5302	2.32479		3.66581e+06	0.170048			0.180356
2104	HAVYWNSSNQHLR	P52797	EFNA3	Ephrin-A3	19.8523	19.9072	1.03879	18.9474	17.039	17.8762	0.559729	17.4208	19.2279	3.49938		134664	0.00624673			0.00349648
4778	SIVLEPIYWNSSNSK	P52799	EFNB2	Ephrin-B2	17.5612	21.3678	13.9927	21.6336	21.1318	20.3622	1.7048	18.8715	18.8543	0.988149		2.29777e+06	0.106588			0.181711
976	DYYIISTSNGSLEGLDNQEGGVCQTR	P52799	EFNB2	Ephrin-B2	22.2342	17.6399	0.0413979	22.2982	17.2389	17.5784	0.790315	17.1172	19.6499	5.78654		154677	0.00717512			0.0056706
5069	TCPAGVMGENNTLVWK	P00533	EGFR	Epidermal growth factor receptor	20.0167	20.428	1.32988	19.0483	25.2857	17.3835	239.221	22.5595	23.5114	1.93442		4.09029e+07	1.89739			453.896
3890	NCTSISGDLHILPVAFR	P00533	EGFR	Epidermal growth factor receptor	20.1438	18.2735	0.273517	27.2185	27.2545	26.6148	1.55801	22.9811	24.1049	2.1792		1.60111e+08	7.4272			11.5716
879	DSLSINATNIK	P00533	EGFR	Epidermal growth factor receptor	18.0111	16.6024	0.376651	26.8605	26.9449	26.6321	1.24212	19.0264	23.3653	20.2367		1.29188e+08	5.99275			7.44369
751	DIVSSDFLSNMSMDFQNHLGSCQK	P00533	EGFR	Epidermal growth factor receptor	19.5525	20.615	2.08855	24.3915	25.2969	25.0912	1.15325	18.3865	18.945	1.47274		4.12217e+07	1.91218			2.20521
6133	YADAGHVCHLCHPNCTYGCTGPGLEGCPTNGPK	P00533	EGFR	Epidermal growth factor receptor	18.2198	17.5838	0.643495	24.0616	17.5397	23.5807	0.0151872	18.4585	19.8239	2.57648		190535	0.0088385			0.000134232
6107	WNFSVGHFELR	Q9NZJ5	EIF2AK3	Eukaryotic translation initiation factor 2-alpha kinase 3	17.3108	19.9102	6.06035	18.4108	19.0024	18.4159	1.5016	18.5109	19.197	1.60893		525161	0.024361			0.0365805
1457	FGNLTYLNLTK	P0C7U0	ELFN1	Protein ELFN1	20.5088	15.8884	0.0406557	17.4305	18.0914	18.0661	1.01769	18.3459	19.5432	2.2931		279289	0.0129556			0.0131848
1456	FGNLTDLNLTK	Q5R3F8	ELFN2	Protein phosphatase 1 regulatory subunit 29	19.8199	19.7235	0.935364	21.4507	22.0587	21.6505	1.32703	18.8678	18.8059	0.958002		4.36848e+06	0.202644			0.268914
3524	LSNLTEGMLR	Q5R3F8	ELFN2	Protein phosphatase 1 regulatory subunit 29	17.2767	17.9764	1.62417	19.0544	18.7007	19.2745	0.671845	18.5213	19.2602	1.6689		426061	0.019764			0.0132783
3807	MNMSVLTLQEYEFEK	Q9H5J4	ELOVL6	Elongation of very long chain fatty acids protein 6	21.0299	22.8062	3.42547	20.8534	22.758	21.2778	2.78987	20.5309	20.4209	0.926588		7.09317e+06	0.329036			0.917969
6392	YVINGTYANETK	Q6PCB8	EMB	Embigin	24.0694	24.3776	1.23816	20.9875	21.1591	18.6327	5.76132	20.4399	18.9916	0.366453		2.34166e+06	0.108624			0.625819
874	DSLACFNQTYTINLYLVETGR	Q8N766	EMC1	ER membrane protein complex subunit 1	22.8506	24.256	2.64891	23.2952	20.6461	17.8979	6.71878	23.2446	21.4894	0.296232		1.64095e+06	0.0761199			0.511433
1809	GHEVEDVDLELFNTSVQLQPPTTAPGPETAAFIER	Q5UCC4	EMC10	ER membrane protein complex subunit 10	25.9928	27.2251	2.34941	25.4916	25.1555	25.4148	0.835493	24.6213	26.6622	4.11502		3.73732e+07	1.73366			1.44846
3527	LSPPSSSAASSYSFSDLNSTR	P50402	EMD	Emerin	17.391	22.0592	25.4254	17.0003	20.4132	20.083	1.25719	18.205	20.7863	5.98479		1.39632e+06	0.0647722			0.0814308
3888	NCTNISCSDSLSYASEDALK	P54849	EMP1	Epithelial membrane protein 1	18.1916	17.1429	0.483404	17.0604	20.8695	21.2871	0.748669	18.6045	17.788	0.567818		1.91578e+06	0.0888686			0.0665332
3853	MYNGSVPFEER	P22413	ENPP1	Ectonucleotide pyrophosphatase/phosphodiesterase family member 1;Alkaline phosphodiesterase I;Nucleotide pyrophosphatase	23.4061	24.1286	1.65004	24.6222	24.8305	24.5384	1.22442	23.4821	24.8126	2.5149		2.98349e+07	1.38397			1.69457
3805	MNASFSLK	P22413	ENPP1	Ectonucleotide pyrophosphatase/phosphodiesterase family member 1;Alkaline phosphodiesterase I;Nucleotide pyrophosphatase	19.8494	20.4907	1.55973	21.1918	20.6295	20.9416	0.805468	20.1181	21.2754	2.2304		1.62218e+06	0.0752491			0.0606108
1585	FPTHYMPYNESVSFEDR	Q9UJA9	ENPP5	Ectonucleotide pyrophosphatase/phosphodiesterase family member 5	18.0388	21.8109	13.662	16.9422	19.4889	16.5805	7.50785	17.4044	18.511	2.15338		735772	0.0341308			0.256249
1393	FDEVYEALTHAHPNLTVYK	Q9UJA9	ENPP5	Ectonucleotide pyrophosphatase/phosphodiesterase family member 5	16.9603	18.0665	2.15278	17.874	18.1392	16.5184	3.07546	23.8085	18.9166	0.0336815		288698	0.013392			0.0411866
4525	RFPTHYMPYNESVSFEDR	Q9UJA9	ENPP5	Ectonucleotide pyrophosphatase/phosphodiesterase family member 5	19.1592	18.3684	0.578023	17.7674	18.675	17.4046	2.41228	20.7763	21.9981	2.33238		418538	0.019415			0.0468346
3460	LQNETAANEVLESIQSYFK	O75355	ENTPD3	Ectonucleoside triphosphate diphosphohydrolase 3	17.1178	17.4886	1.29307	21.0065	17.8674	17.3805	1.40143	19.598	20.4791	1.84178		239124	0.0110924			0.0155453
6160	YEDLVLNETLNK	Q9NQZ7	ENTPD7	Ectonucleoside triphosphate diphosphohydrolase 7	21.5499	22.5402	1.9866	21.7866	21.406	21.2809	1.09058	22.5806	23.4675	1.8492		2.77874e+06	0.128899			0.140576
4441	QRYEDLVLNETLNK	Q9NQZ7	ENTPD7	Ectonucleoside triphosphate diphosphohydrolase 7	17.9256	18.8949	1.95789	18.4912	17.891	18.5509	0.632922	18.8638	21.4109	5.84458		243068	0.0112754			0.00713643
1153	ELFNFSSCQGQEDCAFDGVYQPPLR	Q5MY95	ENTPD8	Ectonucleoside triphosphate diphosphohydrolase 8	15.6347	17.493	3.6258	17.1873	17.9653	19.1908	0.427649	17.5131	21.8848	20.702		255914	0.0118713			0.00507674
3362	LNITQEGPK	Q5NDL2	EOGT	EGF domain-specific O-linked N-acetylglucosamine transferase	18.4525	18.7039	1.19036	20.9296	20.7465	20.4752	1.20689	19.2161	20.2056	1.9855		1.75921e+06	0.0816059			0.0984898
4329	QCNGTSMCWCVNTAGVR	P16422	EPCAM	Epithelial cell adhesion molecule	20.3441	19.559	0.580312	17.5619	17.1174	17.5159	0.758647	20.7484	23.6422	7.43225		142184	0.00659559			0.00500372
3839	MTLTQPWDPLDIPQNSTFEDQYSIGGPQEQITVQEWSDR	Q9UM22	EPDR1	Mammalian ependymin-related protein 1	18.1651	19.341	2.25934	18.0713	22.8781	21.0583	3.53032	17.9118	17.4156	0.708972		7.70893e+06	0.3576			1.26244
4892	SPGANLTYELHVLNQDEER	P21709	EPHA1	Ephrin type-A receptor 1	24.0478	18.1852	0.0171863	17.7384	16.881	17.2661	0.765726	22.6857	24.0078	2.5003		120694	0.00559874			0.0042871
4067	NLSFSASGTQLSLR	P21709	EPHA1	Ephrin type-A receptor 1	22.1829	22.7708	1.50306	17.7195	16.5705	17.4127	0.557792	20.5615	21.4692	1.87605		97323.5	0.00451461			0.00251822
5055	TASVSINQTEPPK	P29317	EPHA2	Ephrin type-A receptor 2	22.18	22.6663	1.40085	24.8417	24.5082	24.4436	1.04579	19.1471	20.0564	1.87813		2.38618e+07	1.10689			1.15758
5374	TSVTVSDLEPHMNYTFTVEAR	P29317	EPHA2	Ephrin type-A receptor 2	17.6415	24.0856	87.0698	25.9836	25.1732	25.2545	0.945206	21.0447	19.1035	0.2604		3.78345e+07	1.75506			1.65889
149	AGFEAVENGTVCR	P29323	EPHB2	Ephrin type-B receptor 2	22.251	22.4568	1.15333	23.9447	23.9646	23.5	1.37993	18.9673	19.9989	2.04429		1.63706e+07	0.759393			1.04791
1192	ELSEYNATAIK	P29323	EPHB2	Ephrin type-B receptor 2	22.0668	22.1915	1.09028	24.6603	24.6018	24.6141	0.991511	18.9277	19.6844	1.68962		2.54613e+07	1.18109			1.17106
6132	YAAVNITTNQAAPSEVPTLR	P54753	EPHB3	Ephrin type-B receptor 3	23.8428	24.5179	1.59671	20.3381	16.5759	19.8675	0.102124	25.1129	26.353	2.36215		97688.4	0.00453154			0.000462781
518	CAQLTVNLTR	P54760	EPHB4	Ephrin type-B receptor 4	21.4937	22.0005	1.4209	18.4538	18.0353	17.9263	1.07848	19.127	18.7263	0.757491		268637	0.0124615			0.0134394
3356	LNGSSLHLEWSAPLESGGR	P54760	EPHB4	Ephrin type-B receptor 4	24.8889	25.4268	1.45186	18.7874	22.0366	21.95	1.06186	23.0796	23.7665	1.60982		4.30207e+06	0.199563			0.211909
765	DLEITNATLQSEEDSR	Q6P179	ERAP2	Endoplasmic reticulum aminopeptidase 2	17.6052	17.8494	1.18444	22.0664	18.3462	17.1835	2.23876	22.6016	23.2331	1.54917		333240	0.0154582			0.0346072
3995	NISDISENLK	Q6P179	ERAP2	Endoplasmic reticulum aminopeptidase 2	17.7983	17.4389	0.779489	19.1277	18.7179	18.8754	0.896577	20.989	21.8135	1.77092		431171	0.020001			0.0179325
878	DSLNSSRPISKPAETPTQIQEMFDEVSYNK	Q6P179	ERAP2	Endoplasmic reticulum aminopeptidase 2	17.1293	18.0302	1.86723	17.917	17.0749	18.064	0.503792	15.9534	22.6357	102.701		138057	0.00640413			0.00322635
1579	FPDEEGACQPCPINCTHSCVDLDDK	P04626	ERBB2	Receptor tyrosine-protein kinase erbB-2	17.5554	22.6229	33.5328	20.9127	20.5278	20.7829	0.837929	23.8363	24.8672	2.0433		1.51176e+06	0.0701272			0.0587616
1806	GHCWGPGPTQCVNCSQFLR	P04626	ERBB2	Receptor tyrosine-protein kinase erbB-2	22.1942	16.2672	0.016436	18.6507	16.1348	20.976	0.0348862	23.0213	24.473	2.7353		71954.6	0.00333781			0.000116444
4076	NLTEILNGGVYVDQNK	Q15303	ERBB4	Receptor tyrosine-protein kinase erbB-4;ERBB4 intracellular domain	18.6788	16.9955	0.31137	17.2813	18.0873	18.2837	0.872726	21.1659	22.2171	2.07225		278497	0.0129188			0.0112746
1056	EFENGSICVECDPQCEK	Q15303	ERBB4	Receptor tyrosine-protein kinase erbB-4;ERBB4 intracellular domain	18.291	19.2144	1.89658	18.2912	17.1729	18.7746	0.329488	20.2761	21.2587	1.97602		147760	0.00685427			0.0022584
4263	NYTADYDKALIFNK	O94905	ERLIN2	Erlin-2	18.7132	16.1494	0.169129	19.8468	19.7313	18.6269	2.15009	21.4647	20.5156	0.517955		870389	0.0403753			0.0868108
2006	GSTLSQWSLGNGTPVTSK	Q7Z2K6	ERMP1	Endoplasmic reticulum metallopeptidase 1	21.5006	22.0533	1.46683	17.3689	18.5936	16.9826	3.05463	20.5884	21.3887	1.74146		395577	0.0183499			0.0560523
6094	WGHNITEFQQR	Q96HE7	ERO1L	ERO1-like protein alpha	25.5603	25.7021	1.10328	26.4314	26.5586	26.4247	1.09726	25.8205	27.0132	2.2858		9.88406e+07	4.58499			5.0309
3050	LGAINSTLSNQSK	Q86YB8	ERO1LB	ERO1-like protein beta	19.7059	19.9632	1.19524	22.1745	22.6544	22.3023	1.27642	23.6309	25.0443	2.66364		6.60167e+06	0.306236			0.390885
3441	LQGVPHVGANVTLSCQSPR	Q96AP7	ESAM	Endothelial cell-selective adhesion molecule	17.4882	18.9858	2.82373	25.658	25.0291	25.2318	0.868923	21.7247	22.4155	1.61418		3.42381e+07	1.58823			1.38005
1995	GSLSLTNLSSSMAGVYVCK	Q96AP7	ESAM	Endothelial cell-selective adhesion molecule	17.121	16.9717	0.901688	20.4657	18.9743	19.8335	0.551258	16.4812	17.4604	1.97137		515031	0.0238911			0.0131702
1213	EMLHNATFCLVPR	Q16394	EXT1	Exostosin-1	18.3658	16.9503	0.37488	21.5814	21.1696	21.4609	0.817165	19.3905	20.6727	2.4321		2.35876e+06	0.109418			0.0894123
574	CTNLSEGVLSVR	Q93063	EXT2	Exostosin-2	17.6128	18.5473	1.91123	17.1504	16.6817	17.4043	0.606004	18.4612	21.4952	8.19078		105122	0.00487635			0.00295509
3934	NFTLTVTDFYR	O43909	EXTL3	Exostosin-like 3	18.8691	18.0127	0.552329	20.5748	19.8381	19.6396	1.1475	19.3576	20.1563	1.73953		937267	0.0434777			0.0498908
6174	YEPFWEDEEKNESGLTEYR	P25116	F2R	Proteinase-activated receptor 1	18.391	18.4488	1.04088	25.0587	17.006	24.1422	0.00710869	16.8934	17.2362	1.26822		131618	0.00610547			4.34019e-05
4123	NNTFLSLR	P13726	F3	Tissue factor	19.6376	20.0262	1.30912	28.5761	28.6053	28.4833	1.08824	22.2895	23.4187	2.18737		4.0837e+08	18.9433			20.6149
4568	RNNTFLSLR	P13726	F3	Tissue factor	16.9052	17.2421	1.26304	27.3099	27.2003	27.1081	1.06599	16.9045	19.2153	4.96158		1.54208e+08	7.15334			7.62543
5101	TEIKPVATEQLLSTFLTVGNNTCFYGK	O75063	FAM20B	Glycosaminoglycan xylosylkinase	17.8061	25.4998	207.031	24.0195	23.571	23.0128	1.47243	25.3837	25.9612	1.49226		1.24617e+07	0.578071			0.851169
1455	FGNETFIIHLDNGR	Q8IXL6	FAM20C	Extracellular serine/threonine protein kinase FAM20C	19.0117	19.6307	1.53581	19.7305	18.8723	18.2158	1.57625	20.0285	21.9203	3.71098		479875	0.0222603			0.0350879
2496	ILQDFSSDPSSNLSSHSLEK	Q8IXL6	FAM20C	Extracellular serine/threonine protein kinase FAM20C	15.5737	18.3588	6.89285	18.6642	16.0083	18.0248	0.247157	19.6291	21.415	3.44834		65914.1	0.00305761			0.000755709
2910	LCDEGHGLEVEINCTR	P25445	FAS	Tumor necrosis factor receptor superfamily member 6	23.671	24.7197	2.06866	22.5318	17.5348	21.5076	0.0636895	26.0325	26.9013	1.82614		189889	0.00880854			0.000561011
4485	QVTQEMLNHTIAIR	Q14517	FAT1	Protocadherin Fat 1;Protocadherin Fat 1, nuclear form	17.013	17.4163	1.32253	19.9369	20.1695	15.8992	19.2969	16.6304	19.2016	5.94304		1.1793e+06	0.0547051			1.05564
6379	YTLNITVYDLGIPQK	Q14517	FAT1	Protocadherin Fat 1;Protocadherin Fat 1, nuclear form	17.4274	18.5233	2.13746	21.5961	18.4398	16.0116	5.38221	16.6255	19.9868	10.2767		355576	0.0164944			0.0887763
2933	LDIGQYLLNVSVTDGK	Q14517	FAT1	Protocadherin Fat 1;Protocadherin Fat 1, nuclear form	17.8159	16.018	0.287593	22.3695	22.0604	21.2795	1.7182	18.0807	18.2682	1.13879		4.37363e+06	0.202883			0.348594
5142	TGALTVQNTTQLR	Q14517	FAT1	Protocadherin Fat 1;Protocadherin Fat 1, nuclear form	15.9857	17.5691	2.99675	22.4724	22.6713	21.957	1.64069	18.19	17.2167	0.50934		6.67946e+06	0.309845			0.508358
4491	QVYNLTVR	Q14517	FAT1	Protocadherin Fat 1;Protocadherin Fat 1, nuclear form	16.62	16.0569	0.676846	20.1385	20.1085	19.771	1.26357	18.183	17.1777	0.498167		1.13048e+06	0.0524402			0.0662616
2557	INSSVTDIEEIIGVR	Q14517	FAT1	Protocadherin Fat 1;Protocadherin Fat 1, nuclear form	17.2424	18.5786	2.52485	23.5946	22.5907	23.0053	0.750227	16.4528	17.8481	2.63043		6.31653e+06	0.293009			0.219824
5857	VNTTTVNIDVSDVNDNAPVFSR	Q14517	FAT1	Protocadherin Fat 1;Protocadherin Fat 1, nuclear form	17.1677	18.5612	2.62715	22.628	18.2435	22.2177	0.0636278	17.9911	17.7284	0.833527		310342	0.0143961			0.000915989
680	DFYQATISESAANLTQVLR	Q6V0I7	FAT4	Protocadherin Fat 4	18.0559	17.6184	0.738413	20.3122	16.826	16.5692	1.19483	19.1762	17.9511	0.427768		116180	0.00538932			0.00643929
6352	YQNVTGFSNVNINR	Q6V0I7	FAT4	Protocadherin Fat 4	17.7829	16.9111	0.546465	20.7383	20.6096	20.502	1.07743	17.8801	21.0382	8.92653		1.59996e+06	0.0742183			0.0799653
3502	LSESHALFAINSSTGALYTTSTIDR	Q6V0I7	FAT4	Protocadherin Fat 4	18.7601	17.6694	0.469534	17.4391	20.5526	20.5247	1.01953	19.305	17.4561	0.277604		1.53797e+06	0.0713431			0.0727362
1140	ELASQIVLNISAR	Q6V0I7	FAT4	Protocadherin Fat 4	18.0152	17.8348	0.882458	20.2947	18.3704	19.0935	0.605794	18.7984	19.1904	1.31221		338876	0.0157197			0.00952291
5779	VLPVNVTDYCQLVR	P35555	FBN1	Fibrillin-1	18.117	18.684	1.48144	17.9858	18.3457	16.6738	3.18634	18.5872	20.7516	4.4828		333124	0.0154529			0.0492381
1947	GPYTLQGLLGCELGPDNTSVPTAK	P55899	FCGRT	IgG receptor FcRn large subunit p51	16.9961	16.5045	0.711236	24.4292	21.8828	23.4364	0.340659	21.1925	24.7436	11.7216		3.86704e+06	0.179383			0.0611085
1931	GNYTCIVENEYGSINHTYQLDVVER	P11362	FGFR1	Fibroblast growth factor receptor 1	16.5564	19.9478	10.4933	21.6881	20.7737	20.468	1.23602	19.116	19.5727	1.3724		1.7927e+06	0.0831591			0.102786
1932	GNYTCVVENEYGSINHTYHLDVVER	P21802	FGFR2	Fibroblast growth factor receptor 2	17.9152	20.508	6.03268	18.5237	17.4763	18.5359	0.479765	22.0051	22.6876	1.60492		182344	0.0084585			0.00405809
4893	SPHRPILQAGLPANQTAVLGSDVEFHCK	P22607	FGFR3	Fibroblast growth factor receptor 3	19.8275	20.3735	1.46003	18.7871	17.6546	18.1562	0.706323	19.4273	20.2787	1.80425		206331	0.00957122			0.00676037
5036	TADINSSEVEVLYLR	P22455	FGFR4	Fibroblast growth factor receptor 4	17.943	21.6923	13.4478	19.2776	17.6167	16.6449	1.96129	21.7453	22.894	2.21714		200981	0.00932305			0.0182852
2163	HIVINGSSFGADGFPYVQVLK	P22455	FGFR4	Fibroblast growth factor receptor 4	17.085	17.2095	1.09013	17.8249	17.7434	17.4973	1.186	22.0596	23.087	2.03835		219430	0.0101788			0.0120721
4894	SPHRPILQAGLPANTTAVVGSDVELLCK	P22455	FGFR4	Fibroblast growth factor receptor 4	17.1679	22.2752	34.4707	19.1444	17.9474	17.7414	1.15349	16.7638	22.4758	52.4183		252758	0.0117249			0.0135245
6248	YINTTLVSR	Q9BVA6	FICD	Adenosine monophosphate-protein transferase FICD	18.9745	18.987	1.0087	20.1734	20.2571	20.3653	0.927745	19.6698	20.5559	1.84817		1.25313e+06	0.0581296			0.0539295
6228	YHYNCSLLDGTQLFTSHDYGAPQEATLGANK	Q96AY3	FKBP10	Peptidyl-prolyl cis-trans isomerase FKBP10	17.7475	20.5829	7.13741	17.4388	19.4403	16.9038	5.8018	26.5496	27.8231	2.41747		711399	0.0330002			0.19146
6229	YHYNGSLMDGTLFDSSYSR	Q96AY3	FKBP10	Peptidyl-prolyl cis-trans isomerase FKBP10	19.7524	20.2841	1.44563	18.5639	17.6102	16.5477	2.08855	26.5001	27.5284	2.03962		200078	0.00928114			0.0193841
6233	YHYNGTLLDGTSFDTSYSK	Q96AY3	FKBP10	Peptidyl-prolyl cis-trans isomerase FKBP10	17.2518	21.4943	18.9287	19.1947	18.7255	17.8968	1.77608	27.1429	27.9916	1.80088		433448	0.0201067			0.0357111
3971	NHTYNTYIGQGYIIPGMDQGLQGACMGER	Q96AY3	FKBP10	Peptidyl-prolyl cis-trans isomerase FKBP10	17.1057	18.9545	3.602	17.0547	17.0101	16.6544	1.27961	23.8737	23.3098	0.676471		131993	0.00612284			0.00783483
6230	YHYNGTFEDGK	Q96AY3	FKBP10	Peptidyl-prolyl cis-trans isomerase FKBP10	17.4301	17.4866	1.03994	17.7811	16.3005	18.9056	0.164356	21.2905	17.8375	0.0913153		80712.2	0.00374406			0.00061536
2131	HGAVVNESHHDALVEDIFDK	Q9NWM8	FKBP14	Peptidyl-prolyl cis-trans isomerase FKBP14	18.8999	17.9422	0.514877	22.0065	21.5439	21.5988	0.962661	20.8836	19.9933	0.539502		3.05746e+06	0.141828			0.136533
2132	HGAVVNESHHDALVEDIFDKEDEDKDGFISAR	Q9NWM8	FKBP14	Peptidyl-prolyl cis-trans isomerase FKBP14	16.9092	17.5427	1.55132	22.7462	21.9104	22.0002	0.939653	20.4885	21.9493	2.75261		3.94174e+06	0.182848			0.171814
6232	YHYNGTLLDGTLFDSSYSR	O95302	FKBP9	Peptidyl-prolyl cis-trans isomerase FKBP9	26.0183	27.0793	2.08638	26.8029	26.3729	26.3353	1.0264	25.7762	27.2023	2.68719		8.69028e+07	4.03122			4.13767
6231	YHYNGTFLDGTLFDSSHNR	O95302	FKBP9	Peptidyl-prolyl cis-trans isomerase FKBP9	25.8681	26.4632	1.51058	26.5402	25.8159	26.0738	0.836304	25.4114	26.5615	2.21929		5.90691e+07	2.74008			2.29154
6227	YHYNASLLDGTLLDSTWNLGK	O95302	FKBP9	Peptidyl-prolyl cis-trans isomerase FKBP9	25.0792	26.0227	1.92319	25.718	24.6118	25.3416	0.602987	24.7879	25.5873	1.74038		2.56383e+07	1.1893			0.717136
770	DLFNLSAPLAR	Q9H9S5	FKRP	Fukutin-related protein	21.3234	21.9173	1.50932	22.5333	22.0667	22.257	0.876423	20.7174	21.4791	1.69549		4.39277e+06	0.203771			0.178589
547	CLALNVSLR	Q9H9S5	FKRP	Fukutin-related protein	17.8577	19.9329	4.21403	20.5973	20.168	20.3855	0.860055	17.91	19.5812	3.18479		1.17808e+06	0.0546482			0.0470004
4910	SQQTHTELSSILTIHNVSQHDLGSYVCK	P35916	FLT4	Vascular endothelial growth factor receptor 3	17.5816	16.9581	0.649094	17.4066	18.452	18.456	0.997231	17.4488	22.8647	42.6922		358596	0.0166344			0.0165884
2111	HEEGHMLNCTCFGQGR	P02751	FN1	Fibronectin;Anastellin;Ugl-Y1;Ugl-Y2;Ugl-Y3	17.8417	18.1668	1.25275	17.74	20.4864	17.4774	8.05006	16.6899	16.4118	0.824676		1.469e+06	0.0681434			0.548559
2069	GWNWTSGFNK	P15328	FOLR1	Folate receptor alpha	21.9488	21.7952	0.899004	21.0353	21.7907	21.1115	1.60125	25.5667	26.6116	2.06322		3.62789e+06	0.16829			0.269474
3928	NFSGPDKDVFFDDR	Q8IWF2	FOXRED2	FAD-dependent oxidoreductase domain-containing protein 2	17.2496	18.235	1.97986	19.3986	18.0255	18.91	0.541675	21.2212	22.607	2.61317		266819	0.0123771			0.00670437
5900	VQYNTTIAHVTLDKDR	Q8IWF2	FOXRED2	FAD-dependent oxidoreductase domain-containing protein 2	17.8	17.952	1.11111	18.281	18.3334	20.165	0.280953	22.2111	21.717	0.710004		330296	0.0153217			0.00430467
452	ATVSINDSVSDLPK	Q5SZK8	FREM2	FRAS1-related extracellular matrix protein 2	20.7285	21.6811	1.93536	19.2201	19.676	18.4706	2.30601	17.5144	18.9178	2.64524		837657	0.038857			0.0896047
4011	NITLPGVK	Q6ZNA5	FRRS1	Ferric-chelate reductase 1	18.6028	17.9439	0.633361	16.8668	17.4377	17.104	1.26024	18.984	19.8913	1.87553		177530	0.00823519			0.0103783
1402	FDLNTSYYIFLADGAANDGR	Q6ZNA5	FRRS1	Ferric-chelate reductase 1	16.1874	18.0203	3.56252	16.8574	17.3067	17.0385	1.2043	20.9751	20.5486	0.744065		162120	0.00752036			0.0090568
1659	FVEQNETAINITTYPDQENNK	Q12841	FSTL1	Follistatin-related protein 1	17.7075	17.4888	0.859339	24.674	23.8493	18.1601	51.5965	20.7176	23.3724	6.29759		1.51131e+07	0.701064			36.1724
2000	GSNYSEILDK	Q12841	FSTL1	Follistatin-related protein 1	18.7318	17.8643	0.548096	23.6704	22.6091	22.3239	1.21858	18.2906	22.5617	19.3076		6.3976e+06	0.29677	0.894976	4.44376	0.361638	0.770645
4200	NTTSVWYTSK	P04066	FUCA1	Tissue alpha-L-fucosidase	20.3597	20.666	1.23653	17.4556	18.2598	20.7162	0.182201	21.7071	22.3065	1.51509		313868	0.0145596			0.00265277
4908	SQNDTVTPDVWYTSKPK	Q9BTY2	FUCA2	Plasma alpha-L-fucosidase	16.1676	16.7202	1.46673	23.5423	18.5723	17.1089	2.75757	16.9312	18.5439	3.05824		389780	0.018081			0.0498597
4907	SQNDTVTPDVWYTSK	Q9BTY2	FUCA2	Plasma alpha-L-fucosidase	22.1439	23.0833	1.91773	18.3277	18.5726	21.1767	0.16447	21.7974	22.1184	1.2492		389861	0.0180848			0.00297441
3030	LFNLTSTFSR	Q495W5	FUT11	Alpha-(1,3)-fucosyltransferase 11	21.7367	22.5343	1.73821	23.0869	22.7266	22.4461	1.21462	22.7521	24.2895	2.90271		6.94046e+06	0.321952			0.391048
1058	EFGFAWPESLNCSK	Q9ULV1	FZD4	Frizzled-4	17.426	22.1185	25.8573	18.5537	17.0869	17.1738	0.941544	22.5315	23.2714	1.67006		139210	0.00645762			0.00608013
4124	NNTIVNELVR	P10253	GAA	Lysosomal alpha-glucosidase;76 kDa lysosomal alpha-glucosidase;70 kDa lysosomal alpha-glucosidase	26.5713	26.9255	1.27828	23.2198	23.3357	22.911	1.34229	27.4045	28.523	2.17121		1.05863e+07	0.491076			0.659168
4532	RGVFITNETGQPLIGK	P10253	GAA	Lysosomal alpha-glucosidase;76 kDa lysosomal alpha-glucosidase;70 kDa lysosomal alpha-glucosidase	17.5887	18.149	1.47458	17.3985	16.6541	16.5383	1.08358	17.2739	21.4918	18.6086		103130	0.00478395			0.00518377
2040	GVFITNETGQPLIGK	P10253	GAA	Lysosomal alpha-glucosidase;76 kDa lysosomal alpha-glucosidase;70 kDa lysosomal alpha-glucosidase	27.2661	27.7926	1.44043	19.0182	15.8182	17.1107	0.408243	28.6163	29.648	2.04443		57776.7	0.00268013			0.00109414
2985	LENLSSSEMGYTATLTR	P10253	GAA	Lysosomal alpha-glucosidase;76 kDa lysosomal alpha-glucosidase;70 kDa lysosomal alpha-glucosidase	25.9301	27.2025	2.41563	20.886	19.6241	22.628	0.124663	26.854	28.3782	2.87627		808058	0.037484			0.00467285
4360	QGIDFCPGQNVSGVTTHNLEDHTK	P34059	GALNS	N-acetylgalactosamine-6-sulfatase	24.9232	21.83	0.11718	22.7796	17.9694	18.0462	0.948158	24.9902	27.0122	4.06146		256642	0.0119051			0.0112879
6276	YLETLPNTSIIIPFHNEGWSSLLR	Q86SR1	GALNT10	Polypeptide N-acetylgalactosaminyltransferase 10	17.3305	17.9301	1.5153	23.8389	18.9545	16.5059	5.45886	23.6728	24.6251	1.93495		508011	0.0235655			0.128641
2247	IAENYTAVVSPDIASIDLNTFEFNKPSPYGSNHNR	Q14435	GALNT3	Polypeptide N-acetylgalactosaminyltransferase 3	17.4148	25.0277	195.754	24.0996	23.4183	17.4735	61.5975	17.2425	24.7891	186.962		1.12101e+07	0.520012			32.0315
1154	ELFYGHGDHLIDQGLDVGNLTQQR	Q7Z7M9	GALNT5	Polypeptide N-acetylgalactosaminyltransferase 5	17.3142	17.4784	1.12054	24.2785	24.29	18.5308	54.1617	19.1853	21.22	4.09738		2.05125e+07	0.951528			51.5363
1186	ELQQFNYTWLR	Q7Z7M9	GALNT5	Polypeptide N-acetylgalactosaminyltransferase 5	17.4648	16.1881	0.412739	22.3465	21.893	21.4491	1.36028	18.8289	19.4362	1.52341		3.89448e+06	0.180656			0.245742
544	CISIENTTVILEDCDGSK	Q7Z7M9	GALNT5	Polypeptide N-acetylgalactosaminyltransferase 5	17.3528	16.7918	0.677832	20.8688	20.1448	19.9352	1.15637	18.0093	19.7127	3.25668		1.15928e+06	0.0537764			0.0621853
3352	LNFSESHLVIITK	Q7Z7M9	GALNT5	Polypeptide N-acetylgalactosaminyltransferase 5	18.5589	17.6022	0.515234	21.7053	21.2147	21.1032	1.08035	18.1174	18.4347	1.246		2.43367e+06	0.112892			0.121963
351	ANTSLPFPK	Q7Z7M9	GALNT5	Polypeptide N-acetylgalactosaminyltransferase 5	18.2221	18.1052	0.922167	22.1324	21.9086	21.8441	1.04572	17.5995	18.0766	1.39194		3.93682e+06	0.18262			0.19097
5772	VLLVLELQGLQKNMTR	Q14697	GANAB	Neutral alpha-glucosidase AB	20.621	16.5105	0.0578917	19.9111	20.5668	20.7747	0.865797	18.4976	20.2963	3.47907		1.55319e+06	0.0720488			0.0623796
3750	MELSMGPIQANHTGTGLLLTLQPEQK	P04062	GBA	Glucosylceramidase	25.1117	25.9612	1.80188	20.8941	22.9839	22.507	1.39175	26.4411	27.7019	2.39629		8.29551e+06	0.38481			0.535559
5474	TYTYADTPDDFQLHNFSLPEEDTK	P04062	GBA	Glucosylceramidase	26.9825	27.7537	1.70669	26.6923	26.4168	26.1015	1.24427	27.8526	29.1578	2.47118		8.95879e+07	4.15578			5.17091
775	DLGPTLANSTHHNVR	P04062	GBA	Glucosylceramidase	25.1251	25.8142	1.61228	25.0889	25.0899	24.7822	1.23773	25.5872	26.985	2.63499		3.57119e+07	1.65659			2.05042
4555	RMELSMGPIQANHTGTGLLLTLQPEQK	P04062	GBA	Glucosylceramidase	18.291	18.8525	1.4758	19.8161	20.2363	20.2867	0.965669	17.019	25.1272	275.938		1.23519e+06	0.0572976			0.0553305
21	AALSNASLLAEACHQIFEGK	Q8N0V5	GCNT2	N-acetyllactosaminide beta-1,6-N-acetylglucosaminyl-transferase, isoform A	16.5815	17.6568	2.10716	17.5063	22.6978	16.5185	72.4694	16.914	17.5825	1.58942		6.80328e+06	0.315589			22.8705
2568	IPGVPGSMPNASWTGNLR	Q8N0V5	GCNT2	N-acetyllactosaminide beta-1,6-N-acetylglucosaminyl-transferase, isoform A	16.9657	16.7484	0.860174	20.3655	21.6742	18.1847	11.2317	19.0687	18.6783	0.762918		3.34645e+06	0.155234			1.74354
347	ANQSWEDSNTDLVPAPAVR	Q99988	GDF15	Growth/differentiation factor 15	21.8105	21.7059	0.930063	20.7345	22.1368	22.003	1.09718	19.9257	18.639	0.409888		4.61149e+06	0.213916			0.234705
3480	LRANQSWEDSNTDLVPAPAVR	Q99988	GDF15	Growth/differentiation factor 15	16.4522	19.5194	8.38145	18.5876	18.2674	20.768	0.176703	17.1473	17.8227	1.59704		315526	0.0146365			0.00258632
1911	GNATLLLNLR	Q8WTR4	GDPD5	Glycerophosphodiester phosphodiesterase domain-containing protein 5	19.6422	20.0092	1.28967	17.9899	18.8425	18.041	1.74291	19.5999	19.4926	0.928324		470065	0.0218052			0.0380046
T: id	Sequence	Accession	Gene name	Protein name	¶ log2(intensity) MCF_C	log2(intensity) MCF_N	Fold change ratio MCF N/C	log2(intensity) MDA_C	log2(intensity) MDA_N1	log2(intensity) MDA_N1	Fold change ratio MDA N1/N2	log2(intensity) T47D_C	log2(intensity) T47D_N	Fold change ratio T47D N/C		#VALUE!	#VALUE!			#VALUE!
1292	ETNFSLASGLEAK	P56159	GFRA1	GDNF family receptor alpha-1	26.9442	28.5909	3.13117	17.2332	17.7412	17.98	0.84745	20.8923	22.116	2.33545		219095	0.0101633			0.00861292
4879	SNVSGNTHLCISNGNYEK	P56159	GFRA1	GDNF family receptor alpha-1	26.2978	27.1955	1.86309	17.9392	16.7033	17.3453	0.640824	19.7627	19.4978	0.832256		106707	0.00494991			0.00317202
2859	LAFATMFNSSEQSQK	P19440	GGT1	Gamma-glutamyltranspeptidase 1;Gamma-glutamyltranspeptidase 1 heavy chain;Gamma-glutamyltranspeptidase 1 light chain	19.5229	17.4148	0.231952	21.5074	22.8129	21.9498	1.81894	24.5486	25.5971	2.06838		7.3683e+06	0.341798			0.621712
4106	NMTSEFFAAQLR	P19440	GGT1;GGT3P;GGT2	Gamma-glutamyltranspeptidase 1;Gamma-glutamyltranspeptidase 1 heavy chain;Gamma-glutamyltranspeptidase 1 light chain;Putative gamma-glutamyltranspeptidase 3;Putative gamma-glutamyltranspeptidase 3 heavy chain;Putative gamma-glutamyltranspeptidase 3 light chain;Inactive gamma-glutamyltranspeptidase 2	17.3522	16.2685	0.471817	17.1783	17.8057	18.3325	0.694093	23.6312	24.466	1.78361		229113	0.010628			0.00737684
4560	RNESHLIDFR	Q9UJ14	GGT7	Gamma-glutamyltransferase 7;Gamma-glutamyltransferase 7 heavy chain;Gamma-glutamyltransferase 7 light chain	19.5476	19.7982	1.1897	16.9937	19.3056	17.753	2.93345	21.9785	23.2124	2.35202		647985	0.0300585			0.0881753
4779	SIVYSCEWPLYMWPFQKPNYTEIR	P06280	GLA	Alpha-galactosidase A	17.96	19.4877	2.88326	18.9537	18.3778	18.6216	0.844518	20.6472	22.3535	3.26323		340619	0.0158005			0.0133438
537	CGALQGLYTTVDFGTGSNITDAFLSQR	P16278	GLB1	Beta-galactosidase	19.9207	24.9785	33.3081	23.9021	18.8248	18.8039	1.01459	25.1688	25.7238	1.46917		464333	0.0215393			0.0218536
3505	LSFGSNSSDFK	Q6UWU2	GLB1L	Beta-galactosidase-1-like protein	18.7137	18.213	0.706764	17.64	19.3728	19.0133	1.28298	20.2605	20.9209	1.58052		678881	0.0314918			0.0404033
4078	NLTEKPPHIEVYETAEDRDK	O94923	GLCE	D-glucuronyl C5-epimerase	20.9464	22.888	3.84131	22.0417	18.6321	18.1329	1.41343	18.5147	23.0567	23.2958		406276	0.0188462			0.0266378
4077	NLTEKPPHIEVYETAEDR	O94923	GLCE	D-glucuronyl C5-epimerase	19.5608	20.6866	2.18223	18.7443	19.334	19.3995	0.955614	19.8121	19.8633	1.03613		660867	0.0306561			0.0292954
5538	VDVVICLSTTVRNDTLQEAK	Q92896	GLG1	Golgi apparatus protein 1	18.2009	18.8108	1.52615	19.7768	18.739	17.414	2.50533	21.5405	23.2087	3.17818		437523	0.0202957			0.0508474
2911	LCHTHGWNETSEFMPQGAVFSCLYR	Q92896	GLG1	Golgi apparatus protein 1	25.0424	25.1465	1.07482	22.8086	19.545	18.2867	2.39214	25.4192	26.8841	2.76044		764947	0.0354841			0.0848829
1917	GNITEYQCHQYITK	Q92896	GLG1	Golgi apparatus protein 1	17.9625	17.6733	0.818356	23.2624	16.0772	22.809	0.00940863	19.362	26.7647	169.213		69138.4	0.00320717			3.01751e-05
3220	LLEFDSTNVSDTAAKPLGR	Q8WWB7	GLMP	Glycosylated lysosomal membrane protein	23.6371	24.4534	1.76088	24.7915	24.4705	23.9368	1.44764	25.4902	26.2206	1.6591		2.32463e+07	1.07834			1.56105
3219	LLEFDSTNVSDTAAK	Q8WWB7	GLMP	Glycosylated lysosomal membrane protein	23.2088	23.9362	1.65565	23.8746	23.7763	23.4305	1.27086	24.8127	25.4654	1.57211		1.43674e+07	0.666473			0.846991
5110	TFANGSLAFR	Q8WWB7	GLMP	Glycosylated lysosomal membrane protein	23.4161	24.0939	1.5997	24.3585	24.3458	24.1185	1.17064	25.1628	26.2538	2.13022		2.13214e+07	0.989052			1.15783
4845	SLTLEPDPIIVPGNVTLSVMGSTSVPLSSPLK	P17900	GM2A	Ganglioside GM2 activator;Ganglioside GM2 activator isoform short	17.6917	24.4043	104.88	18.6133	17.3918	17.1441	1.18731	19.6721	25.7691	68.451		171970	0.00797731			0.00947156
5870	VPMLVLDPALPANITLK	Q3T906	GNPTAB	N-acetylglucosamine-1-phosphotransferase subunits alpha/beta;N-acetylglucosamine-1-phosphotransferase subunit alpha;N-acetylglucosamine-1-phosphotransferase subunit beta	16.7037	23.0587	81.8551	19.8296	19.8171	16.7357	8.46435	23.0897	24.6086	2.86572		923723	0.0428494			0.362692
5317	TNVSHVVGQLDDIRK	Q3T906	GNPTAB	N-acetylglucosamine-1-phosphotransferase subunits alpha/beta;N-acetylglucosamine-1-phosphotransferase subunit alpha;N-acetylglucosamine-1-phosphotransferase subunit beta	16.3681	20.1009	13.2949	18.9091	18.4773	17.9972	1.39484	16.5251	21.8447	39.9355		364940	0.0169287			0.0236129
5316	TNVSHVVGQLDDIR	Q3T906	GNPTAB	N-acetylglucosamine-1-phosphotransferase subunits alpha/beta;N-acetylglucosamine-1-phosphotransferase subunit alpha;N-acetylglucosamine-1-phosphotransferase subunit beta	21.9948	22.705	1.63603	19.7438	19.6106	19.3432	1.20364	21.7494	23.2521	2.83373		800532	0.0371349			0.0446969
4068	NLSHLPTFSSPAIESHIHR	Q3T906	GNPTAB	N-acetylglucosamine-1-phosphotransferase subunits alpha/beta;N-acetylglucosamine-1-phosphotransferase subunit alpha;N-acetylglucosamine-1-phosphotransferase subunit beta	21.1697	22.2403	2.10031	17.4833	19.3872	19.4781	0.938937	21.4512	22.7492	2.45888		685691	0.0318077			0.0298654
2385	IHELPLSLQDLTGLEHMLINCSK	Q3T906	GNPTAB	N-acetylglucosamine-1-phosphotransferase subunits alpha/beta;N-acetylglucosamine-1-phosphotransferase subunit alpha;N-acetylglucosamine-1-phosphotransferase subunit beta	22.2982	17.8926	0.0471826	18.5293	17.6779	18.9021	0.428035	22.7243	23.2704	1.46013		209690	0.00972705			0.00416352
2575	IPLVNISLLPK	Q3T906	GNPTAB	N-acetylglucosamine-1-phosphotransferase subunits alpha/beta;N-acetylglucosamine-1-phosphotransferase subunit alpha;N-acetylglucosamine-1-phosphotransferase subunit beta	22.9652	23.4944	1.44313	18.9379	17.5935	20.7631	0.111136	23.301	24.5116	2.31434		197775	0.00917433			0.0010196
6168	YEFCPFHNVTQHEQTFR	Q9UJJ9	GNPTG	N-acetylglucosamine-1-phosphotransferase subunit gamma	19.5987	22.954	10.234	22.384	21.8204	22.0638	0.844752	24.252	25.7832	2.89026		3.70335e+06	0.17179			0.14512
6412	YYNYTLSINGK	P15586	GNS	N-acetylglucosamine-6-sulfatase	25.735	26.8465	2.1607	25.3397	25.6152	25.2788	1.2626	26.8184	28.129	2.48045		5.13977e+07	2.38422			3.01032
5334	TPMTNSSIQFLDNAFRK	P15586	GNS	N-acetylglucosamine-6-sulfatase	18.927	17.8985	0.49022	18.9622	18.9208	18.6034	1.24608	17.325	23.6515	80.2539		496282	0.0230214			0.0286865
5333	TPMTNSSIQFLDNAFR	P15586	GNS	N-acetylglucosamine-6-sulfatase	26.2799	27.3201	2.05651	25.2599	25.9392	25.9566	0.988012	27.5714	28.9962	2.68477		6.43394e+07	2.98456			2.94878
1717	GASNLTWR	P15586	GNS	N-acetylglucosamine-6-sulfatase	20.5887	21.2143	1.54285	18.0352	16.8278	16.9769	0.901813	22.1412	18.0053	0.0568814		116325	0.00539604			0.00486622
3465	LQQDVLQFQKNQTNLER	Q8NBJ4	GOLM1	Golgi membrane protein 1	16.9613	18.1667	2.30601	18.8353	18.8929	18.1375	1.6881	20.9927	21.2157	1.16716		486777	0.0225804			0.038118
4700	SFDDHFQHLLNDSER	P35052	GPC1	Glypican-1;Secreted glypican-1	21.202	23.6822	5.57975	24.2844	22.9117	16.1632	107.523	19.7092	22.9033	9.15208		7.89058e+06	0.366026			39.3562
797	DLPIMFDVLIHDPSHFLNYSTINYK	Q14956	GPNMB	Transmembrane glycoprotein NMB	19.084	16.7258	0.195034	18.8341	16.9599	17.7434	0.580956	25.882	26.0038	1.08809		127479	0.00591346			0.00343546
705	DGYMVVNVSSLSLNEPEDK	Q5VW38	GPR107	Protein GPR107	23.2804	24.3996	2.17226	20.0216	21.3886	21.0533	1.26164	22.7893	19.1773	0.0817861		2.74543e+06	0.127354			0.160675
706	DGYMVVNVSSLSLNEPEDKDVTIGFSLDR	Q5VW38	GPR107	Protein GPR107	23.611	24.3602	1.68086	22.3732	18.832	21.4852	0.158967	24.1018	25.224	2.17679		466656	0.0216471			0.00344118
6167	YEEQQLEIQNSSR	Q8IZF2	GPR116	Probable G-protein coupled receptor 116	18.1285	17.8062	0.799794	23.8361	24.0607	23.264	1.73712	17.5427	16.716	0.563817		1.74982e+07	0.8117			1.41002
5787	VLQQQWTNQSSQLLHSVER	Q8IZF2	GPR116	Probable G-protein coupled receptor 116	15.8249	18.0926	4.81555	25.4491	25.2983	24.8924	1.32492	17.9771	18.273	1.22765		4.12617e+07	1.91404			2.53594
3562	LTIHNITPGDAGEYVCK	Q8IZF2	GPR116	Probable G-protein coupled receptor 116	18.7822	18.6414	0.907016	24.1267	23.9194	23.7547	1.12093	17.8199	18.3266	1.4208		1.58656e+07	0.735969			0.824972
1318	EVLSSNVSWR	Q8IZF2	GPR116	Probable G-protein coupled receptor 116	17.2148	18.5174	2.46673	24.5223	24.2125	24.1585	1.03814	17.7453	18.1063	1.28432		1.94397e+07	0.901762			0.936154
1333	EWNGTYHCIFR	Q8IZF2	GPR116	Probable G-protein coupled receptor 116	17.473	16.9285	0.685629	22.5064	22.0307	22.4376	0.754242	18.8343	20.2259	2.62369		4.28451e+06	0.198749			0.149905
3946	NGSFSGLSLLER	Q8IWK6	GPR125	Probable G-protein coupled receptor 125	17.8544	18.6287	1.71036	19.4436	17.1688	17.6064	0.738362	18.3164	19.8274	2.85008		147341	0.00683481			0.00504657
3034	LFPATGNSTNLADDGK	Q8IWK6	GPR125	Probable G-protein coupled receptor 125	18.1391	17.0782	0.479333	17.5173	16.8972	19.5135	0.163085	18.8095	20.5111	3.25261		122057	0.00566196			0.000923384
1774	GFNASYIR	Q86SQ4	GPR126	G-protein coupled receptor 126	20.0882	20.5363	1.36424	18.9649	19.1076	18.7578	1.27438	18.9476	20.296	2.5463		564886	0.0262038			0.0333937
4704	SFGGWNTSGCVAHR	Q86SQ4	GPR126	G-protein coupled receptor 126	20.982	21.8096	1.77473	20.3345	20.6929	20.388	1.23533	20.0182	21.201	2.27017		1.69505e+06	0.0786297			0.0971338
2294	IDLNSTSHVNITTR	Q86SQ4	GPR126	G-protein coupled receptor 126	24.0259	24.317	1.22357	23.1439	22.8764	22.8225	1.03807	22.9193	24.1383	2.32785		7.69986e+06	0.357179			0.370776
2482	ILLQDLSSSAPHLANATLETEWFHGLR	Q5T848	GPR158	Probable G-protein coupled receptor 158	16.5747	17.6659	2.13051	17.31	17.5671	17.3335	1.17577	20.219	21.199	1.97247		194189	0.00900797			0.0105913
5050	TALSSENCSFQYQLR	Q9UJ42	GPR160	Probable G-protein coupled receptor 160	18.7455	18.3987	0.786326	19.5738	18.9051	18.4269	1.393	20.7142	21.1287	1.33284		490910	0.0227722			0.0317218
5496	VANLTEPVVLTFQHQLQPK	Q9Y653	GPR56	G-protein coupled receptor 56;GPR56 N-terminal fragment;GPR56 C-terminal fragment	25.5964	25.2309	0.7762	23.0436	23.9088	18.6588	38.0546	25.3127	26.5657	2.38337		1.57495e+07	0.730582			27.802
1775	GFNLTLAK	Q9BY21	GPR87	G-protein coupled receptor 87	19.0612	19.5282	1.38223	18.2385	18.1786	17.1827	1.99432	18.6515	18.0106	0.641313		296691	0.0137628			0.0274475
1731	GDDIPEMNETVTLSLDR	Q8WXG9	GPR98	G-protein coupled receptor 98	18.7015	18.7579	1.03987	18.7872	18.5918	16.9311	3.1617	17.766	20.2704	5.67413		395084	0.018327			0.0579446
6312	YNGTAIISLVR	Q8WXG9	GPR98	G-protein coupled receptor 98	16.928	18.0477	2.17302	19.2749	18.4081	16.798	3.05273	20.4829	18.5145	0.255536		347849	0.0161359			0.0492585
5546	VEEATQNITLSIIR	Q8WXG9	GPR98	G-protein coupled receptor 98	17.4919	18.6525	2.2355	17.0551	19.4474	18.7732	1.59571	18.4385	19.5349	2.1382		714909	0.033163			0.0529186
5837	VNITIIR	Q8WXG9	GPR98	G-protein coupled receptor 98	15.86	17.434	2.97729	18.394	17.1945	17.6921	0.708284	17.8339	18.6386	1.74678		149989	0.00695766			0.004928
1942	GPNVTDSLTNR	Q13003	GRIK3	Glutamate receptor ionotropic, kainate 3	17.3158	17.5097	1.14385	20.2146	18.5624	17.0723	2.80908	18.4827	20.8389	5.1202		387114	0.0179573			0.0504437
5244	TLLPNTTLTYDIQR	Q13003	GRIK3	Glutamate receptor ionotropic, kainate 3	17.4966	16.4867	0.496581	18.3548	17.9899	17.3456	1.56298	21.9061	23.6098	3.25735		260315	0.0120754			0.0188737
5640	VGVWSPADGLNITEVAK	Q13003	GRIK3	Glutamate receptor ionotropic, kainate 3	16.3778	16.2771	0.93258	17.8205	18.1346	18.1113	1.01628	17.5582	23.4675	60.1003		287779	0.0133494			0.0135667
1978	GRGPNVTDSLTNR	Q13003	GRIK3	Glutamate receptor ionotropic, kainate 3	17.3781	19.0299	3.14225	17.4223	16.4555	17.0277	0.67259	18.8673	21.1448	4.84837		89866.8	0.00416871			0.00280384
6364	YSGVNLTGFR	Q13003	GRIK3	Glutamate receptor ionotropic, kainate 3	17.742	17.5575	0.879954	19.3345	16.832	17.5896	0.591479	21.3737	22.6783	2.47015		116664	0.00541178			0.00320095
1215	ENATTDLLTK	P28799	GRN	Granulins;Acrogranin;Paragranulin;Granulin-1;Granulin-2;Granulin-3;Granulin-4;Granulin-5;Granulin-6;Granulin-7	23.4478	24.0083	1.47478	24.2694	24.2544	23.9514	1.23371	24.0744	25.1806	2.15278		2.00125e+07	0.928335			1.14529
2651	ITIAINNTLTPTTLPPGTIQYLTDTSK	P08236	GUSB	Beta-glucuronidase	16.5666	16.7823	1.16127	17.5133	18.4078	17.8461	1.47601	25.4263	25.6927	1.2028		347776	0.0161325			0.0238118
3884	NCSFEDDNIR	Q4G148	GXYLT1	Glucoside xylosyltransferase 1	16.1893	18.8703	6.413	20.3657	20.7123	20.0543	1.57789	16.7354	21.321	24.0106		1.718e+06	0.0796942			0.125749
2764	KFNSTQIAAMAPEHEEPR	Q4G148	GXYLT1	Glucoside xylosyltransferase 1	17.9102	17.6645	0.843406	18.0419	18.0648	17.9591	1.07602	18.035	22.5663	23.1237		274187	0.0127189			0.0136857
1570	FNSTQIAAMAPEHEEPR	Q4G148	GXYLT1	Glucoside xylosyltransferase 1	20.8103	21.7198	1.87839	17.6809	16.1394	22.7387	0.0103137	22.3947	24.601	4.6149		72184.4	0.00334847			3.4535e-05
5126	TFLNTTVEK	Q9ULI3	HEG1	Protein HEG homolog 1	19.5334	20.1704	1.55509	23.5759	23.1551	22.8023	1.27704	20.886	22.0244	2.20137		9.3407e+06	0.433294			0.553332
4164	NSSGPDLSWLHFYR	Q9ULI3	HEG1	Protein HEG homolog 1	16.0742	17.4602	2.61353	16.1107	18.9742	19.1447	0.888535	19.188	16.5291	0.15834		514995	0.0238895			0.0212266
4613	SAEGTFFINKTEIEDFPR	P06865	HEXA	Beta-hexosaminidase subunit alpha	21.5678	18.9336	0.161074	20.9694	19.2637	17.9534	2.47993	20.8304	19.1832	0.319259		629436	0.0291981			0.0724093
6332	YPNCTGGAAGYIDR	Q68CP4	HGSNAT	Heparan-alpha-glucosaminide N-acetyltransferase	20.5796	21.2265	1.5658	21.3762	21.1296	21.0974	1.02257	23.6754	24.7956	2.17377		2.29426e+06	0.106426			0.108828
1447	FGEFGNYSLLVK	Q68CP4	HGSNAT	Heparan-alpha-glucosaminide N-acetyltransferase	20.8943	17.5819	0.100663	22.8758	22.7027	22.694	1.00605	24.655	26.1996	2.91723		6.82643e+06	0.316662			0.318578
155	AGKPSAAAASVSTQHGSILQLNDTLEEK	Q68CP4	HGSNAT	Heparan-alpha-glucosaminide N-acetyltransferase	16.6272	17.9434	2.49009	19.6553	19.0859	19.4701	0.766204	20.4072	22.8209	5.32839		556453	0.0258126			0.0197777
4303	PSAAAASVSTQHGSILQLNDTLEEK	Q68CP4	HGSNAT	Heparan-alpha-glucosaminide N-acetyltransferase	18.6653	20.2714	3.04428	20.9548	16.3784	19.1106	0.150496	19.0891	23.9955	29.9898		85190.2	0.00395178			0.000594728
2057	GVTFNLSGGSSK	A8MVS5	HIDE1	Protein HIDE1	19.2402	17.4635	0.29185	17.7324	18.4648	17.5843	1.84101	18.3796	18.6999	1.24859		361792	0.0167827			0.0308972
2100	GYYNQSEAGSHTVQR	P01892	HLA-A	HLA class I histocompatibility antigen, A-2 alpha chain;HLA class I histocompatibility antigen, A-69 alpha chain	25.5333	25.711	1.13108	27.4992	26.4405	27.4613	0.492843	17.9908	18.5126	1.43575		9.10717e+07	4.22461			2.08207
2101	GYYNQSEAGSHTWQR	P30488	HLA-B	HLA class I histocompatibility antigen, B-50 alpha chain;HLA class I histocompatibility antigen, B-45 alpha chain;HLA class I histocompatibility antigen, B-41 alpha chain	18.5543	17.3996	0.44916	26.4737	27.0584	26.546	1.42642	17.1636	18.3173	2.22484		1.39762e+08	6.48325			9.24785
2098	GYYNQSEAGSHTLQSMYGCDVGPDGR	Q31610	HLA-B	HLA class I histocompatibility antigen, B-81 alpha chain;HLA class I histocompatibility antigen, B-40 alpha chain;HLA class I histocompatibility antigen, B-48 alpha chain;HLA class I histocompatibility antigen, B-42 alpha chain;HLA class I histocompatibility antigen, B-8 alpha chain;HLA class I histocompatibility antigen, B-7 alpha chain	16.7057	18.3952	3.22545	26.3466	26.9869	26.6983	1.22145	18.442	19.4308	1.98453		1.33005e+08	6.16977			7.5361
2099	GYYNQSEAGSHTLQWMYGCDVGPDGR	P30462	HLA-B	HLA class I histocompatibility antigen, B-14 alpha chain	19.4867	18.3331	0.449502	17.8667	18.4048	19.5156	0.463037	26.913	28.3178	2.64781		347054	0.016099			0.00745445
4867	SNHTQATNDPPEVTVFPK	P20036	HLA-DPA1	HLA class II histocompatibility antigen, DP alpha 1 chain	19.294	16.994	0.203063	23.5892	17.4453	18.1899	0.596833	18.6075	17.2537	0.39126		178467	0.00827869			0.004941
4340	QECYAFNGTQR	P04440	HLA-DPB1	HLA class II histocompatibility antigen, DP beta 1 chain	17.7393	17.1334	0.657061	22.2097	21.4752	21.4572	1.01255	19.7719	18.1916	0.334412		2.91527e+06	0.135233			0.136931
1652	FTPPVVNVTWLR	P01903	HLA-DRA	HLA class II histocompatibility antigen, DR alpha chain	19.2423	19.2962	1.03807	26.5774	25.9796	26.0137	0.976641	18.6096	18.3957	0.862203		6.61666e+07	3.06932			2.99762
4590	RSNYTPITNVPPEVTVLTNSPVELR	P01903	HLA-DRA	HLA class II histocompatibility antigen, DR alpha chain	17.2718	17.4816	1.15653	24.7931	23.9077	24.1158	0.865677	16.6724	20.053	10.4151		1.57375e+07	0.730025			0.631966
4883	SNYTPITNVPPEVTVLTNSPVELR	P01903	HLA-DRA	HLA class II histocompatibility antigen, DR alpha chain	17.8165	17.4005	0.7495	26.1097	25.1485	25.3663	0.859876	17.5856	17.8731	1.22052		3.71923e+07	1.72526			1.48351
1511	FLEYSTSECHFFNGTER	Q9GIY3	HLA-DRB1	HLA class II histocompatibility antigen, DRB1-14 beta chain;HLA class II histocompatibility antigen, DRB1-13 beta chain;HLA class II histocompatibility antigen, DRB1-11 beta chain;HLA class II histocompatibility antigen, DRB1-3 chain	19.6264	16.6586	0.127821	26.2481	25.8496	25.7974	1.03684	18.8508	19.2276	1.29846		6.04651e+07	2.80484			2.90818
4671	SECHFFNGTER	P79483	HLA-DRB3	HLA class II histocompatibility antigen, DR beta 3 chain	17.4314	19.0188	3.00507	22.316	17.6919	19.0228	0.39752	19.3305	20.4244	2.1345		211735	0.0098219			0.0039044
4311	PVQGIPTYVLLNTSGISTPAR	Q96RW7	HMCN1	Hemicentin-1	17.0662	20.3888	10.0047	17.0378	18.3122	17.1469	2.2428	16.4658	18.1024	3.10932		325478	0.0150982			0.0338622
4887	SPENISVVEK	Q96RW7	HMCN1	Hemicentin-1	18.5042	19.0416	1.45135	17.4174	16.3953	16.079	1.24513	17.7517	17.4944	0.836652		86194	0.00399834			0.00497847
5790	VLRPPGGGSNFSLGFDEPTEQPVR	Q9UK76	HN1	Hematological and neurological expressed 1 protein;Hematological and neurological expressed 1 protein, N-terminally processed	21.2546	21.0141	0.846452	22.0682	21.5504	20.4006	2.21883	22.6748	22.6783	1.00243		3.07126e+06	0.142469			0.316114
6010	VVLHPNYSQVDIGLIK	P00738	HP	Haptoglobin;Haptoglobin alpha chain;Haptoglobin beta chain	17.122	17.9162	1.73412	21.7469	21.5788	21.3752	1.15157	17.0846	21.6594	23.8315		3.13232e+06	0.145301			0.167324
5042	TAGANGTSGFFCVDEGR	P05981	HPN	Serine protease hepsin;Serine protease hepsin non-catalytic chain;Serine protease hepsin catalytic chain	17.0313	19.3838	5.10708	19.6713	17.0634	18.0751	0.495961	21.4882	21.399	0.940044		136960	0.00635328			0.00315098
5037	TADLQWNSSNAQLLLDYCSSK	Q9Y251	HPSE	Heparanase;Heparanase 8 kDa subunit;Heparanase 50 kDa subunit	18.3576	16.697	0.316308	21.3402	20.5669	17.8696	6.48587	17.2122	19.1151	3.73964		1.55329e+06	0.0720538			0.467331
2088	GYNISWELGNEPNSFLK	Q9Y251	HPSE	Heparanase;Heparanase 8 kDa subunit;Heparanase 50 kDa subunit	18.8587	17.1089	0.297343	21.6752	21.2405	21.6321	0.762284	18.1819	19.8908	3.26911		2.47758e+06	0.114929			0.0876087
4837	SLPNSSCLLEDK	P35367	HRH1	Histamine H1 receptor	16.68	18.3249	3.12726	21.7748	21.4598	21.8097	0.784638	17.5946	18.1601	1.4799		2.88432e+06	0.133797			0.104982
6225	YHVLHINTTK	Q7LGA3	HS2ST1	Heparan sulfate 2-O-sulfotransferase 1	16.8315	21.6859	28.9281	15.7416	16.6881	15.7606	1.90198	21.9683	17.8776	0.0586917		105589	0.00489803			0.00931595
1172	ELISNSSDALDK	P07900	HSP90AA1;HSP90AA2P	Heat shock protein HSP 90-alpha;Heat shock protein HSP 90-alpha A2	23.0149	16.9798	0.0152494	22.8418	22.6136	22.4542	1.11682	24.5828	18.4604	0.014354		6.41759e+06	0.297697			0.332475
1169	ELISNASDALDK	P08238	HSP90AB1;HSP90B1	Heat shock protein HSP 90-beta;Endoplasmin	24.2878	21.7368	0.170637	25.7016	25.2072	25.2902	0.944092	24.9523	23.1935	0.295494		3.87368e+07	1.79691			1.69645
1033	EEEAIQLDGLNASQIR	P14625	HSP90B1	Endoplasmin	26.2123	27.1308	1.89015	25.7356	25.6738	25.2352	1.35529	27.1533	27.3907	1.17887		5.35284e+07	2.48306			3.36526
5075	TDDEVVQREEEAIQLDGLNASQIR	P14625	HSP90B1	Endoplasmin	23.5373	24.6483	2.15995	25.3213	25.1253	24.954	1.12607	25.7592	27.9544	4.57953		3.6599e+07	1.69774			1.91178
2245	IADDKYNDTFWK	P14625	HSP90B1	Endoplasmin	20.5931	20.5742	0.986985	25.252	25.0485	24.9691	1.05658	22.4467	18.0337	0.0469412		3.47016e+07	1.60973			1.70081
2063	GVVDSDDLPLNVSR	P14625	HSP90B1	Endoplasmin	18.3918	23.0137	24.6224	26.5323	26.8674	26.8008	1.04725	24.6727	25.7727	2.14355		1.22432e+08	5.67932			5.94764
6311	YNDTFWK	P14625	HSP90B1;HSP90B2P	Endoplasmin;Putative endoplasmin-like protein	17.2531	17.7075	1.37021	21.7626	21.9187	21.9445	0.982276	19.0629	19.4054	1.26795		3.96448e+06	0.183903			0.180644
4172	NSTIEAANLAGLK	P48723	HSPA13	Heat shock 70 kDa protein 13	22.3102	23.5368	2.34015	25.1158	25.4793	25.1909	1.22129	24.2288	25.7629	2.89608		4.67771e+07	2.16988			2.65005
4977	SVHGGVPQNVSLWAHR	Q12891	HYAL2	Hyaluronidase-2	21.0863	21.089	1.00187	18.8594	19.669	19.4176	1.19036	19.168	22.3518	9.08697		833602	0.0386689			0.04603
5588	VFGSQNLTTVK	Q9Y4L1	HYOU1	Hypoxia up-regulated protein 1	27.8133	28.5076	1.6181	28.8255	28.8646	28.4974	1.28985	28.5303	29.9261	2.63134		4.88777e+08	22.6732			29.245
5688	VINETWAWK	Q9Y4L1	HYOU1	Hypoxia up-regulated protein 1	27.0563	27.7234	1.58788	27.7636	27.9739	27.6889	1.21841	27.4918	28.7218	2.34567		2.63623e+08	12.2289			14.8998
102	AEPPLNASASDQGEK	Q9Y4L1	HYOU1	Hypoxia up-regulated protein 1	24.7859	25.4837	1.62203	25.1269	25.4933	25.2623	1.17365	25.5756	26.7661	2.28232		4.72333e+07	2.19104			2.57151
737	DINTTAQNIMFYDMGSGSTVCTIVTYQMVK	Q9Y4L1	HYOU1	Hypoxia up-regulated protein 1	18.4159	25.6794	153.65	19.5051	17.2347	22.7341	0.0221063	25.6594	27.5469	3.69994		154227	0.00715426			0.000158154
1218	ENGTDTVQEEEESPAEGSK	Q9Y4L1	HYOU1	Hypoxia up-regulated protein 1	17.6504	26.1278	356.411	26.2739	17.839	26.1574	0.00313265	26.4513	27.2646	1.75723		234463	0.0108762			3.40713e-05
343	ANLTVVLLR	P05362	ICAM1	Intercellular adhesion molecule 1	22.5825	23.0532	1.38578	26.1133	25.9415	25.8962	1.0319	22.6475	22.7905	1.1042		6.44421e+07	2.98932			3.08467
1992	GSLEVNCSTTCNQPEVGGLETSLDK	P13598	ICAM2	Intercellular adhesion molecule 2	17.561	18.3467	1.72393	23.1927	23.1298	22.8408	1.22179	19.0004	19.9437	1.92292		9.17833e+06	0.425762			0.520193
26	AAPAPQEATATFNSTADR	P13598	ICAM2	Intercellular adhesion molecule 2	18.3449	18.0551	0.818015	20.9459	21.0832	21.008	1.05351	17.0065	19.1106	4.29929		2.22165e+06	0.103057			0.108572
27	AAPAPQEATATFNSTADREDGHR	P13598	ICAM2	Intercellular adhesion molecule 2	15.5251	18.7766	9.52355	17.1695	17.3192	21.7619	0.0459848	18.4155	18.527	1.08035		163530	0.0075858			0.000348831
5721	VLAPGIYVCNATNR	Q9UMF0	ICAM5	Intercellular adhesion molecule 5	17.5485	16.7049	0.557251	19.3741	19.3486	19.2464	1.07341	19.7085	19.6784	0.979352		667589	0.0309679			0.0332412
3032	LFNVTPQDEQK	O75144	ICOSLG	ICOS ligand	23.883	24.0627	1.13265	21.4734	21.4132	21.1747	1.17977	23.2073	24.2966	2.12771		2.79264e+06	0.129544			0.152832
5453	TVVTYHIPQNSSLENVDSR	O75144	ICOSLG	ICOS ligand	24.9351	24.7642	0.888288	22.5795	17.8796	22.4357	0.0425086	23.8588	25.0251	2.24435		241155	0.0111866			0.000475528
1025	EDVQALNISVPYGPIPVDFQR	P22304	IDS	Iduronate 2-sulfatase;Iduronate 2-sulfatase 42 kDa chain;Iduronate 2-sulfatase 14 kDa chain	20.3195	21.6325	2.48458	18.2207	20.3934	19.9431	1.36632	17.3281	18.2197	1.85523		1.37729e+06	0.0638893			0.0872935
1900	GLSYNFTHLDGYLDLLR	P35475	IDUA	Alpha-L-iduronidase	16.1535	22.6829	92.373	17.728	16.7925	18.571	0.291486	17.3813	21.8356	21.9219		113513	0.00526562			0.00153485
1600	FQVNNTRPPHVQLLR	P35475	IDUA	Alpha-L-iduronidase	24.1298	24.2104	1.05746	18.8431	16.1195	21.5398	0.0233522	23.0509	24.9105	3.62907		71195.6	0.0033026			7.71228e-05
1232	ENTSSWYEVDSFTPFR	P17181	IFNAR1	Interferon alpha/beta receptor 1	19.126	19.9478	1.76761	19.5874	18.6941	17.5721	2.17648	19.9289	20.0709	1.10343		424116	0.0196738			0.0428197
4641	SDESVGNVTFSFDYQK	P17181	IFNAR1	Interferon alpha/beta receptor 1	20.0674	17.7918	0.206527	17.2257	20.7017	20.1313	1.48494	21.2784	22.1807	1.86904		1.70543e+06	0.0791108			0.117474
90	AEKENTSSWYEVDSFTPFR	P17181	IFNAR1	Interferon alpha/beta receptor 1	19.7661	17.5007	0.207992	20.4844	19.8599	19.5877	1.20765	18.5617	22.0057	10.883		951537	0.0441396			0.0533051
4196	NTTAADTYNITDPEELETEYPFFESR	P08069	IGF1R	Insulin-like growth factor 1 receptor;Insulin-like growth factor 1 receptor alpha chain;Insulin-like growth factor 1 receptor beta chain	18.5366	17.9349	0.658977	18.5243	19.6337	17.9926	3.11904	23.481	19.3265	0.0561527		813453	0.0377342			0.117694
2578	IQATSLSGNGSWTDPVFFYVQAK	P08069	IGF1R	Insulin-like growth factor 1 receptor;Insulin-like growth factor 1 receptor alpha chain;Insulin-like growth factor 1 receptor beta chain	22.3604	23.4476	2.12461	21.0747	19.9471	19.3663	1.49568	23.3454	24.2975	1.93469		1.01082e+06	0.0468898			0.0701321
5299	TNASVPSIPLDVLSASNSSSQLIVK	P08069	IGF1R	Insulin-like growth factor 1 receptor;Insulin-like growth factor 1 receptor alpha chain;Insulin-like growth factor 1 receptor beta chain	25.5323	26.5884	2.0793	21.0427	20.1805	22.1737	0.251181	26.0092	26.9031	1.85819		1.18833e+06	0.0551238			0.013846
4921	SRNTTAADTYNITDPEELETEYPFFESR	P08069	IGF1R	Insulin-like growth factor 1 receptor;Insulin-like growth factor 1 receptor alpha chain;Insulin-like growth factor 1 receptor beta chain	24.973	25.7841	1.75455	21.8143	18.5296	20.8807	0.195997	24.7436	25.755	2.01587		378412	0.0175537			0.00344046
605	DAGVGFPEYQEEDNSTYNFR	P11717	IGF2R	Cation-independent mannose-6-phosphate receptor	24.5077	19.2646	0.026404	25.8457	25.8047	18.6267	144.808	26.0783	27.0769	1.99806		5.86123e+07	2.71889			393.718
3950	NGSSIVDLSPLIHR	P11717	IGF2R	Cation-independent mannose-6-phosphate receptor	22.0862	22.7374	1.57047	23.9591	24	23.6753	1.2524	23.4952	24.7693	2.41848		16777216	0.778257			0.974692
5307	TNITLVCK	P11717	IGF2R	Cation-independent mannose-6-phosphate receptor	19.6396	20.16	1.43435	21.8135	21.9456	21.6728	1.20815	19.0655	19.2236	1.11582		4.03909e+06	0.187364			0.226364
5156	TGPVVEDSGSLLLEYVNGSACTTSDGR	P11717	IGF2R	Cation-independent mannose-6-phosphate receptor	24.1898	25.3751	2.27411	25.8839	25.1189	24.9435	1.12928	25.4391	26.3476	1.87709		3.6437e+07	1.69023			1.90874
5308	TNITLVCKPGDLESAPVLR	P11717	IGF2R	Cation-independent mannose-6-phosphate receptor	24.4692	24.7319	1.19972	26.9664	26.5797	26.4457	1.09733	26.246	27.7147	2.76772		1.00297e+08	4.65254			5.10538
4821	SLLEFNTTVSCDQQGTNHR	P11717	IGF2R	Cation-independent mannose-6-phosphate receptor	24.3555	25.1574	1.7434	25.7044	25.4384	25.4986	0.959131	25.6365	27.0128	2.59602		4.54696e+07	2.10923			2.02303
2126	HFNYTSLIAFHCK	P11717	IGF2R	Cation-independent mannose-6-phosphate receptor	21.7581	21.7503	0.994608	22.9329	22.1643	22.947	0.581278	22.9503	24.5988	3.13508		4.70023e+06	0.218033			0.126738
5099	TEGENCTVFDSQAGFSFDLSPLTK	P11717	IGF2R	Cation-independent mannose-6-phosphate receptor	17.3642	18.0386	1.59593	23.4184	17.3577	18.4053	0.483772	24.0234	24.3629	1.26532		167953	0.00779097			0.00376905
3743	MDGCTLTDEQLLYSFNLSSLSTSTFK	P11717	IGF2R	Cation-independent mannose-6-phosphate receptor	18.5985	23.6769	33.7871	15.6917	18.3344	22.6859	0.0489855	23.993	24.8185	1.77215		330525	0.0153323			0.000751061
508	AYLLPAPPAPGNASESEEDR	P17936	IGFBP3	Insulin-like growth factor-binding protein 3	17.8727	18.321	1.36443	20.2915	21.8074	21.2594	1.46206	17.2802	19.6835	5.29012		3.67013e+06	0.170249			0.248914
1856	GLCVNASAVSR	P17936	IGFBP3	Insulin-like growth factor-binding protein 3	17.8769	19.0365	2.23395	21.0685	21.832	21.9857	0.898942	15.5512	18.1901	6.22857		3.73325e+06	0.173177			0.155676
4978	SVHNVTGAQVGLSCEVR	Q8WX77	IGFBPL1	Insulin-like growth factor-binding protein-like 1	18.1784	19.0016	1.76933	20.2884	19.6005	19.1469	1.36945	17.9844	20.5691	5.99891		794947	0.0368758			0.0504997
4304	PSAVVQMGQNVSLR	Q8N6C5	IGSF1	Immunoglobulin superfamily member 1	20.5917	21.303	1.63728	17.5786	18.4193	17.9933	1.3435	18.0182	19.2048	2.27616		350560	0.0162617			0.0218476
4084	NLTLWCR	Q8N6C5	IGSF1	Immunoglobulin superfamily member 1	21.7209	22.7309	2.01391	18.5415	17.1721	16.9892	1.13516	17.6262	19.3695	3.348		147678	0.00685047			0.0077764
1828	GIGNYSCSYR	Q8N6C5	IGSF1	Immunoglobulin superfamily member 1	22.5592	23.2768	1.64444	19.9461	16.4233	16.7965	0.772068	17.9697	18.4334	1.37907		87883.2	0.0040767			0.00314749
4506	RAEDTAGQTALTVMRPDASLQVDTVVPNATVSEK	O75054	IGSF3	Immunoglobulin superfamily member 3	24.8499	24.9993	1.10911	16.82	19.4258	17.7444	3.20739	24.3558	25.7267	2.58632		704285	0.0326702			0.104786
3596	LTVLQASPQDTGNYSCHVEEWLPSPQK	O75054	IGSF3	Immunoglobulin superfamily member 3	16.2025	18.5167	4.97329	19.1726	17.8071	16.9036	1.8706	24.606	26.176	2.96905		229335	0.0106383			0.0199001
5889	VQGNSTLLHITDLQAR	O75054	IGSF3	Immunoglobulin superfamily member 3	25.0169	25.9158	1.86464	19.2665	19.7934	19.175	1.53517	24.5725	25.9572	2.61118		908672	0.0421512			0.0647093
3530	LSQAQGNLSVLETR	O75054	IGSF3	Immunoglobulin superfamily member 3	24.859	25.2244	1.28824	17.9871	18.0222	18.0677	0.968954	24.087	25.3676	2.4294		266209	0.0123488			0.0119654
4272	PDASLQVDTVVPNATVSEK	O75054	IGSF3	Immunoglobulin superfamily member 3	20.2154	21.2266	2.01559	17.8975	17.2894	19.7124	0.186468	18.9501	19.0829	1.09642		160187	0.00743072			0.00138559
2371	IGPGEPLELLCNVSGALPPAGR	Q969P0	IGSF8	Immunoglobulin superfamily member 8	23.6086	23.6791	1.05008	23.2336	22.8973	17.7045	36.5754	24.3687	25.4819	2.16325		7.81221e+06	0.362391			13.2546
1756	GETASLLCNISVR	Q969P0	IGSF8	Immunoglobulin superfamily member 8	23.72	23.4947	0.855417	23.3449	22.9316	22.8779	1.03792	24.3836	25.8472	2.75796		8.00017e+06	0.37111			0.385184
1713	GANVSWEPGFDGGYLQR	Q9P2J2	IGSF9	Protein turtle homolog A	20.1922	20.285	1.06644	19.5257	18.5996	18.0028	1.51236	20.093	21.8321	3.33827		397226	0.0184264			0.0278673
776	DLGQGQGQVQVQNGTLR	Q9P2J2	IGSF9	Protein turtle homolog A	19.407	19.9398	1.44673	17.7102	17.5065	17.38	1.09164	19.4553	21.1495	3.23597		186201	0.00863743			0.00942898
2634	ISNLTIVQAEIK	Q70UQ0	IKBIP	Inhibitor of nuclear factor kappa-B kinase-interacting protein	22.6947	23.4363	1.67203	24.9174	24.7672	24.4806	1.21976	18.4944	23.6556	35.7829		2.85542e+07	1.32456			1.61565
4334	QDILNNSLTTLSQDITK	Q70UQ0	IKBIP	Inhibitor of nuclear factor kappa-B kinase-interacting protein	21.5112	17.4894	0.0615627	25.8606	17.864	25.8621	0.0039114	22.1925	23.9277	3.32926		238561	0.0110663			4.32847e-05
562	CMNTTLTECDFSSLSK	Q08334	IL10RB	Interleukin-10 receptor subunit beta	21.6175	22.8398	2.33318	20.7457	20.6826	20.6364	1.03254	21.4382	22.4636	2.03552		1.683e+06	0.0780703			0.0806109
1918	GNLTFTAQYLSYR	Q08334	IL10RB	Interleukin-10 receptor subunit beta	16.8039	23.3382	92.6873	19.2351	17.916	18.3973	0.716332	18.5193	17.9629	0.679997		247317	0.0114725			0.00821808
4191	NTSPDTNYTLYYWHR	P78552	IL13RA1	Interleukin-13 receptor subunit alpha-1	20.8371	21.9164	2.11301	20.7355	20.6621	20.6657	0.997508	19.4208	20.6644	2.36789		1.65925e+06	0.0769688			0.076777
4880	SNVTLTLR	Q96F46	IL17RA	Interleukin-17 receptor A	21.1274	17.774	0.0978422	18.712	18.2874	16.8648	2.68068	18.3075	18.426	1.08561		319931	0.0148409			0.0397836
5978	VTTPCMSSGSLWDPNITVETLEAHQLR	Q96F46	IL17RA	Interleukin-17 receptor A	20.7024	17.4671	0.106189	20.3894	18.6536	18.6082	1.03197	16.3175	21.9036	48.0379		412376	0.0191292			0.0197407
4170	NSTCLDDSWIHPR	Q96F46	IL17RA	Interleukin-17 receptor A	22.0711	23.0051	1.91057	22.0675	21.6192	21.8804	0.834394	20.6462	22.2049	2.94588		3.22127e+06	0.149428			0.124681
305	ALVCSQPGLNCTVK	Q96F46	IL17RA	Interleukin-17 receptor A	22.5728	22.8958	1.25093	21.2095	16.4206	17.5144	0.468526	21.2843	22.3292	2.06322		87718.9	0.00406908			0.00190647
364	APGGDPCQPLVPPLSWENVTVDK	Q8NAC3	IL17RC	Interleukin-17 receptor C	19.1631	19.8635	1.62496	19.6782	17.2866	17.9359	0.63759	21.1618	21.8303	1.58942		159877	0.00741631			0.00472856
931	DVLWFRPTLLNDTGNYTCMLR	Q9NPH3	IL1RAP	Interleukin-1 receptor accessory protein	21.1231	19.0535	0.238226	23.0706	18.4422	18.1539	1.2212	22.2986	23.4643	2.24342		356168	0.0165218			0.0201765
5906	VSAVNATSWEPLTNLSLVCLDSASAPR	Q6UWB1	IL27RA	Interleukin-27 receptor subunit alpha	22.767	22.245	0.696406	19.8595	21.7437	17.0747	25.4395	22.1156	22.6633	1.46175		3.51161e+06	0.162895			4.14398
3415	LPPGNLSALLPGNFTVGVPYR	Q6UWB1	IL27RA	Interleukin-27 receptor subunit alpha	21.2873	21.4459	1.1162	20.9995	20.5184	20.6155	0.93491	21.3639	21.4628	1.07096		1.50194e+06	0.0696718			0.0651369
2727	IYNVTYLEPSLR	P24394	IL4R	Interleukin-4 receptor subunit alpha;Soluble interleukin-4 receptor subunit alpha	15.9283	21.4409	45.6518	17.8301	21.6439	21.3376	1.23653	18.9049	20.7808	3.67031		3.2769e+06	0.152008			0.187963
1284	ETHLETNFTLK	P40189	IL6ST	Interleukin-6 receptor subunit beta	19.4764	20.8666	2.62115	24.0075	24.0829	23.6716	1.32988	18.1385	21.7741	12.4287		1.77695e+07	0.824287			1.09621
4062	NLSCIVNEGK	P40189	IL6ST	Interleukin-6 receptor subunit beta	18.5964	19.7884	2.28469	22.5913	22.9267	22.6191	1.23765	21.6297	22.9818	2.55283		7.97305e+06	0.369851			0.457746
4265	NYTIFYR	P40189	IL6ST	Interleukin-6 receptor subunit beta	17.0695	19.2015	4.38325	17.4093	22.5209	22.3539	1.12272	21.1856	22.3312	2.21238		6.0182e+06	0.27917			0.313431
3597	LTVNLTNDR	P40189	IL6ST	Interleukin-6 receptor subunit beta	20.2044	21.0939	1.85253	23.8157	24.024	23.9137	1.07945	23.2401	24.4698	2.34518		1.70586e+07	0.791312			0.854183
4746	SHLQNYTVNATK	P40189	IL6ST	Interleukin-6 receptor subunit beta	18.4656	20.1466	3.2065	23.413	21.4825	23.7228	0.211642	21.7057	23.6497	3.84771		2.93006e+06	0.135919			0.0287662
4466	QVALQTFGNQTTIIPAGGAGYK	Q9NX62	IMPAD1	Inositol monophosphatase 3	25.4069	26.1453	1.66832	25.7872	24.7392	24.5006	1.17985	26.5676	28.4619	3.71742		2.80054e+07	1.2991			1.53275
1757	GETLEIGNYSFYALDNQNLR	P06213	INSR	Insulin receptor;Insulin receptor subunit alpha;Insulin receptor subunit beta	18.6608	21.0969	5.41177	18.5738	19.1534	17.6879	2.76159	17.9838	17.801	0.880991		583107	0.027049			0.0746982
1898	GLSPGNYSVR	P06213	INSR	Insulin receptor;Insulin receptor subunit alpha;Insulin receptor subunit beta	20.2594	20.6976	1.35491	21.5185	21.7888	21.3979	1.31121	18.9299	20.4633	2.89467		3.62312e+06	0.168068			0.220373
4689	SELGAVIFWGQNQTLDPNNMTILNR	Q8TB96	ITFG1	T-cell immunomodulatory protein	18.4348	25.0904	100.817	17.394	21.2163	18.096	8.69569	24.2366	24.9276	1.6144		2.43637e+06	0.113017			0.982765
3966	NHSALITSVVPGDYDGDSQMDVLLTYLPK	Q8TB96	ITFG1	T-cell immunomodulatory protein	14.4132	25.0808	1626.55	17.057	16.6694	21.1733	0.0440749	18.2657	24.5156	76.104		104229	0.00483495			0.0002131
4190	NTSGSNQQAFLLENVPCNNASCEEAR	Q8TB96	ITFG1	T-cell immunomodulatory protein	24.001	18.0703	0.0163939	18.3963	17.4296	22.6271	0.0272519	19.1286	19.5261	1.31722		176536	0.00818908			0.000223168
4274	PDTLAVAVENGTGTDR	Q9H0X4	ITFG3	Protein ITFG3	18.0763	20.5666	5.61895	17.8354	18.4853	17.3791	2.15278	19.0505	18.9246	0.916432		366969	0.0170229			0.0366465
6255	YKPDTLAVAVENGTGTDR	Q9H0X4	ITFG3	Protein ITFG3	25.6776	26.145	1.38262	22.2	17.9236	22.2123	0.051165	24.7959	25.6764	1.84101		248623	0.011533			0.000590088
4658	SDPHWESMLNATTR	Q9H0X4	ITFG3	Protein ITFG3	23.97	24.4548	1.39939	20.6439	16.0628	20.7709	0.0382579	23.477	24.1761	1.62349		68451.8	0.00317532			0.000121481
4694	SENASLVLSSSNQK	P56199	ITGA1	Integrin alpha-1	16.7739	18.6774	3.7412	21.6167	21.5134	21.1019	1.33007	18.6255	19.0072	1.30288		2.9935e+06	0.138861			0.184695
6314	YNHTGQVIIYR	P56199	ITGA1	Integrin alpha-1	18.2756	18.7973	1.43565	20.9974	21.2024	20.8365	1.28869	18.2262	16.5273	0.308021		2.41301e+06	0.111934			0.144247
6080	VYVYALNQTR	P56199	ITGA1	Integrin alpha-1	17.6476	18.1962	1.46267	21.6452	21.0057	20.6741	1.25841	18.5566	19.57	2.01866		2.10545e+06	0.0976672			0.122905
2939	LDLPVNTSIPNVTEVK	P56199	ITGA1	Integrin alpha-1	17.4104	17.4944	1.05995	23.101	22.9504	22.6385	1.24134	17.3451	17.7919	1.36301		8.10511e+06	0.375977			0.466716
5015	SYFSSLNLTIR	P56199	ITGA1	Integrin alpha-1	18.0191	17.0395	0.50712	21.2704	20.8557	20.748	1.07751	19.8589	18.3151	0.342981		1.89754e+06	0.0880226			0.0948452
1573	FNVSLTVK	P56199	ITGA1	Integrin alpha-1	17.0585	17.6009	1.45639	20.9954	20.2347	20.473	0.847744	17.1425	18.7445	3.03564		1.23382e+06	0.0572341			0.0485198
2119	HFFNVSDELALVTIVK	P56199	ITGA1	Integrin alpha-1	18.584	17.9208	0.631476	19.852	17.5004	18.2315	0.602444	17.3206	19.4119	4.26132		185415	0.00860099			0.00518162
5309	TNMSLGLILTR	P17301	ITGA2	Integrin alpha-2	23.4447	24.3872	1.92186	26.0871	26.2395	26.2206	1.01319	25.2569	26.5398	2.43328		7.92276e+07	3.67519			3.72365
1760	GEYFVNVTTR	P17301	ITGA2	Integrin alpha-2	23.0143	23.6704	1.57582	25.9474	25.9599	25.9538	1.00424	24.4802	25.7131	2.35039		6.52692e+07	3.02769			3.04052
5054	TASCSNVTCWLK	P17301	ITGA2	Integrin alpha-2	24.6507	25.0961	1.36169	26.3502	26.0764	26.1507	0.949803	25.7257	26.668	1.92159		7.07585e+07	3.28232			3.11756
4317	QAFDQILQDRNHSSYLGYSVAAISTGESTHFVAGAPR	P17301	ITGA2	Integrin alpha-2	17.7717	17.4236	0.785618	23.2687	21.5572	21.6371	0.946123	18.3443	23.1562	28.0884		3.08577e+06	0.143142			0.13543
355	ANYTGQIVLYSVNENGNITVIQAHR	P17301	ITGA2	Integrin alpha-2	24.1166	24.7803	1.58414	26.8783	26.3608	26.5999	0.847274	25.8279	26.8676	2.0558		8.6177e+07	3.99755			3.38702
6186	YFFNVSDEAALLEK	P17301	ITGA2	Integrin alpha-2	23.9673	24.9788	2.01601	26.2864	25.6255	25.8686	0.844928	25.1201	26.0006	1.84101		5.17659e+07	2.4013			2.02893
3969	NHSSYLGYSVAAISTGESTHFVAGAPR	P17301	ITGA2	Integrin alpha-2	21.8055	22.3965	1.50629	24.7995	24.259	24.8738	0.65302	23.7349	24.5478	1.75674		2.00764e+07	0.9313			0.608158
6048	VWNSTFIEDYR	P26006	ITGA3	Integrin alpha-3;Integrin alpha-3 heavy chain;Integrin alpha-3 light chain	24.5292	25.022	1.40717	28.0766	28.216	27.8178	1.31786	24.2699	24.5256	1.19391		3.1179e+08	14.4632			19.0606
6049	VWNSTFIEDYRDFDR	P26006	ITGA3	Integrin alpha-3;Integrin alpha-3 heavy chain;Integrin alpha-3 light chain	17.4052	23.2146	56.0794	28.2454	28.0396	27.6812	1.282	23.2241	25.3996	4.51742		2.75906e+08	12.7986			16.4079
4009	NITLAYTLEADR	P26006	ITGA3	Integrin alpha-3;Integrin alpha-3 heavy chain;Integrin alpha-3 light chain	20.7338	21.7128	1.9711	23.7798	23.6958	23.3839	1.24134	20.8516	20.4687	0.766894		1.35877e+07	0.630303			0.782421
4008	NITIVTGAPR	P26006	ITGA3	Integrin alpha-3;Integrin alpha-3 heavy chain;Integrin alpha-3 light chain	17.1263	25.468	324.416	27.8701	27.3566	27.2351	1.08787	18.9701	24.8313	58.1296		1.71853e+08	7.97187			8.67232
3489	LRPIIISMNYSLPLR	P26006	ITGA3	Integrin alpha-3;Integrin alpha-3 heavy chain;Integrin alpha-3 light chain	24.5411	25.0806	1.45347	28.0733	28.2071	28.0918	1.0832	24.9582	25.5524	1.50964		3.09873e+08	14.3743			15.5702
4562	RNITLAYTLEADR	P26006	ITGA3	Integrin alpha-3;Integrin alpha-3 heavy chain;Integrin alpha-3 light chain	21.1748	21.7272	1.46652	24.5658	23.8082	23.7087	1.0714	20.6781	21.5196	1.79191		1.46887e+07	0.681374			0.730025
4563	RNITLAYTLEADRDR	P26006	ITGA3	Integrin alpha-3;Integrin alpha-3 heavy chain;Integrin alpha-3 light chain	22.7669	16.3957	0.0120803	27.4909	26.2419	26.2198	1.01544	22.8926	17.9202	0.0318536		7.93595e+07	3.68131			3.73813
176	AHCVWLECPIPDAPVVTNVTVK	P26006	ITGA3	Integrin alpha-3;Integrin alpha-3 heavy chain;Integrin alpha-3 light chain	23.9631	24.8001	1.78633	28.0422	27.4805	27.4973	0.988423	24.4522	25.86	2.65332		1.87264e+08	8.68676			8.58619
4010	NITLAYTLEADRDR	P26006	ITGA3	Integrin alpha-3;Integrin alpha-3 heavy chain;Integrin alpha-3 light chain	22.881	23.7923	1.88074	27.4914	26.8877	26.9559	0.953827	23.3209	24.1167	1.73604		1.24166e+08	5.7598			5.49385
4288	PIIISMNYSLPLR	P26006	ITGA3	Integrin alpha-3;Integrin alpha-3 heavy chain;Integrin alpha-3 light chain	17.8976	18.9691	2.10162	20.9852	21.0332	21.3015	0.830297	18.4743	17.6693	0.572362		2.14597e+06	0.0995467			0.0826534
3276	LLLSINVTNTR	P26006	ITGA3	Integrin alpha-3;Integrin alpha-3 heavy chain;Integrin alpha-3 light chain	22.0607	23.2479	2.2771	26.1285	25.3413	25.8156	0.719816	23.6121	23.998	1.30667		4.251e+07	1.97194			1.41944
6050	VWNSTFIEDYRDFDRVR	P26006	ITGA3	Integrin alpha-3;Integrin alpha-3 heavy chain;Integrin alpha-3 light chain	18.1777	17.4704	0.612465	24.463	17.9151	23.8381	0.0164816	20.6083	19.9502	0.633712		247162	0.0114653			0.000188966
1238	EPLSDPVGTCYLSTDNFTR	P08648	ITGA5	Integrin alpha-5;Integrin alpha-5 heavy chain;Integrin alpha-5 light chain	23.3768	23.5721	1.14496	23.0059	22.9122	17.1036	56.0484	17.1838	21.5546	20.6891		7.89332e+06	0.366153			20.5223
5102	TEKEPLSDPVGTCYLSTDNFTR	P08648	ITGA5	Integrin alpha-5;Integrin alpha-5 heavy chain;Integrin alpha-5 light chain	25.1774	25.4564	1.21335	25.8816	25.745	25.5274	1.1628	24.2288	25.1232	1.85884		5.62364e+07	2.60868			3.03336
2723	IYLRNESEFR	P08648	ITGA5	Integrin alpha-5;Integrin alpha-5 heavy chain;Integrin alpha-5 light chain	20.7216	20.733	1.00793	22.4999	22.3392	22.2234	1.08358	20.1865	22.2631	4.21812		5.30602e+06	0.246134			0.266705
1919	GNLTYGYVTILNGSDIR	P08648	ITGA5	Integrin alpha-5;Integrin alpha-5 heavy chain;Integrin alpha-5 light chain	25.1846	25.8314	1.56569	26.005	25.4432	25.5452	0.93174	24.5817	25.0563	1.38953		4.56212e+07	2.11626			1.97181
2197	HPGNFSSLSCDYFAVNQSR	P08648	ITGA5	Integrin alpha-5;Integrin alpha-5 heavy chain;Integrin alpha-5 light chain	25.5281	26.0216	1.40786	26.1561	25.8904	26.0886	0.871637	24.7407	25.5334	1.73231		6.21995e+07	2.88529			2.51493
6355	YQTLNCSVNVNCVNIR	P23229	ITGA6	Integrin alpha-6;Integrin alpha-6 heavy chain;Integrin alpha-6 light chain;Processed integrin alpha-6	22.6984	23.858	2.23395	26.3438	26.3896	25.8002	1.50462	22.8723	24.088	2.32253		8.79146e+07	4.07816			6.13608
3692	LWNSTFLEEYSK	P23229	ITGA6	Integrin alpha-6;Integrin alpha-6 heavy chain;Integrin alpha-6 light chain;Processed integrin alpha-6	23.944	24.2714	1.25475	27.1848	27.0539	26.8601	1.14377	24.0508	25.0364	1.98014		1.39327e+08	6.46306			7.39227
4920	SRLWNSTFLEEYSK	P23229	ITGA6	Integrin alpha-6;Integrin alpha-6 heavy chain;Integrin alpha-6 light chain;Processed integrin alpha-6	15.7004	18.039	5.05812	20.3976	18.9489	20.1234	0.443037	17.469	17.6172	1.10819		506043	0.0234742			0.0103999
352	ANTTQPGIVEGGQVLK	P06756	ITGAV	Integrin alpha-V;Integrin alpha-V heavy chain;Integrin alpha-V light chain	24.0262	24.4002	1.29594	24.0706	22.949	22.8407	1.07796	23.6125	24.9126	2.46246		8.09725e+06	0.375613			0.404894
890	DTCTQECSYFNITK	P05556	ITGB1	Integrin beta-1	26.9993	27.7406	1.67168	29.0507	29.0832	28.9821	1.07259	27.2941	28.3659	2.10205		5.68742e+08	26.3827			28.2978
2759	KENSSEICSNNGECVCGQCVCR	P05556	ITGB1	Integrin beta-1	17.1843	18.4827	2.45956	27.053	26.8527	26.7792	1.05227	18.4483	18.4222	0.982072		1.2119e+08	5.62174			5.91557
2751	KDTCTQECSYFNITK	P05556	ITGB1	Integrin beta-1	18.3441	18.4425	1.07059	16.957	16.7449	17.5361	0.577863	17.3062	23.9526	100.176		109829	0.00509472			0.00294405
3353	LNFTGPGDPDSIR	P05107	ITGB2	Integrin beta-2	18.295	19.9682	3.18921	21.9484	22.5634	22.209	1.27845	17.5857	20.2006	6.12581		6.19812e+06	0.287517			0.367577
3929	NFSIQVR	P05106	ITGB3	Integrin beta-3	18.4053	17.7776	0.647207	17.1996	17.9435	18.5787	0.643852	18.5043	17.1169	0.382253		252076	0.0116932			0.00752871
564	CNGSGTYVCGLCECSPGYLGTR	P18084	ITGB5	Integrin beta-5	19.9363	17.466	0.180454	21.7421	21.696	17.5439	17.779	20.9144	22.0067	2.13214		3.3974e+06	0.157598			2.80192
4513	RDCVECLLLHSGKPDNQTCHSLCR	P18084	ITGB5	Integrin beta-5	16.8106	19.098	4.88176	16.6029	20.9095	17.152	13.5245	16.8747	22.9594	67.8699		1.96964e+06	0.0913671			1.23569
2718	IYGPFCECDNFSCAR	P18084	ITGB5	Integrin beta-5	19.1255	19.6806	1.46927	21.3365	21.4966	21.3973	1.07125	20.1851	21.5503	2.57612		2.95884e+06	0.137254			0.147034
4873	SNLTVLR	P18084	ITGB5	Integrin beta-5	17.7125	18.4325	1.64718	16.275	19.0751	19.0557	1.01354	19.2189	19.5803	1.28467		552303	0.0256201			0.0259669
634	DCVECLLLHSGKPDNQTCHSLCR	P18084	ITGB5	Integrin beta-5	22.9748	23.2876	1.24212	24.3812	24.2885	24.3522	0.956807	24.2617	25.4775	2.3227		2.04912e+07	0.950539			0.909483
3933	NFTALIPGTTVEILDGDSK	P18084	ITGB5	Integrin beta-5	21.0353	21.656	1.53762	24.0683	23.7458	23.8879	0.906199	23.309	24.7358	2.6885		1.40669e+07	0.652531			0.591323
4162	NSSDIVQIAPQSLILK	P18564	ITGB6	Integrin beta-6	16.4525	16.3731	0.946451	17.7271	17.7928	17.3233	1.38463	20.8992	21.953	2.07599		227074	0.0105334			0.0145849
582	CYVIPLNTSIVMPPR	Q9Y287	ITM2B	Integral membrane protein 2B;BRI2, membrane form;BRI2 intracellular domain;BRI2C, soluble form;Bri23 peptide	20.6739	21.7576	2.11946	21.6621	21.3187	17.6541	12.681	20.6092	21.6151	2.0082		2.61558e+06	0.121331			1.5386
1216	ENCSPTIPASNTADEEYEDGIER	Q14571	ITPR2	Inositol 1,4,5-trisphosphate receptor type 2	17.3867	19.0268	3.11687	19.0414	18.2563	17.253	2.00458	18.8535	20.5097	3.15185		313108	0.0145244			0.0291152
696	DGNSSLIAAVAEVR	P78504	JAG1	Protein jagged-1	17.78	17.725	0.962594	20.9666	20.4621	20.3806	1.05812	17.5476	19.766	4.65377		1.44446e+06	0.0670052			0.0708994
3951	NGSTEIYGECGVCPR	Q9P055	JKAMP	JNK1/MAPK8-associated membrane protein	19.7122	19.3506	0.778301	19.4157	19.3865	19.4089	0.984593	19.7228	20.498	1.71143		685359	0.0317922			0.0313024
1557	FNISIEPVIYVVQR	P23352	KAL1	Anosmin-1	17.0821	17.9673	1.84702	20.3744	17.7054	17.6077	1.07007	17.5951	18.3687	1.70953		213726	0.00991424			0.0106089
4872	SNLSDLLEK	Q6UW63	KDELC1	KDEL motif-containing protein 1	19.4603	19.8266	1.28904	19.0772	19.9613	19.5752	1.30686	20.8475	22.2578	2.65792		1.02082e+06	0.0473536			0.0618843
4565	RNLSDLLEK	Q7Z4H8	KDELC2	KDEL motif-containing protein 2	20.209	20.7642	1.46937	23.0755	23.1279	17.1204	64.3336	21.9849	19.6396	0.196786		9.16625e+06	0.425201			27.3547
2824	KVNGTPSPIPIISWCGSLDSR	Q7Z4H8	KDELC2	KDEL motif-containing protein 2	15.8593	17.8691	4.02726	20.9298	17.1828	15.8138	2.58291	18.7912	21.9762	9.09454		148778	0.00690146			0.0178259
4063	NLSDLLEK	Q7Z4H8	KDELC2	KDEL motif-containing protein 2	19.0688	20.2679	2.29596	22.1343	21.6977	21.5746	1.08907	21.2761	22.5702	2.45224		3.40141e+06	0.157783			0.171838
5831	VNGTPSPIPIISWCGSLDSR	Q7Z4H8	KDELC2	KDEL motif-containing protein 2	18.465	21.7425	9.69674	23.1806	19.2972	22.0683	0.146493	23.0346	23.3277	1.22527		644223	0.029884			0.00437779
613	DALSLQFEPVLLPTSTTNFTK	A2VDJ0	KIAA0922	Transmembrane protein 131-like	17.8415	21.2298	10.4708	19.7941	18.6598	17.3031	2.56099	20.0664	20.7898	1.65107		414152	0.0192116			0.0492005
5642	VGYQSQNISCFFR	Q6NSJ0	KIAA1161	Uncharacterized family 31 glucosidase KIAA1161	21.2783	18.7156	0.169258	19.2134	20.7993	17.9568	7.17262	23.6669	24.266	1.51477		1.82479e+06	0.0846479			0.607147
3119	LHHFNSSHLEIDDMYTPAYGDFDFDEVKFPNASDMFR	Q6NSJ0	KIAA1161	Uncharacterized family 31 glucosidase KIAA1161	16.4999	18.16	3.16038	18.5206	17.3067	16.3865	1.89238	19.4788	24.5163	32.8427		162120	0.00752036			0.0142314
5826	VNDSVPFHLGWNSTER	Q6NSJ0	KIAA1161	Uncharacterized family 31 glucosidase KIAA1161	20.0721	23.7834	13.0982	22.6582	18.6708	22.2985	0.0809009	25.4493	26.4184	1.95762		417322	0.0193586			0.00156613
2731	IYSINVTNVMNGVASYCR	Q6UXG2	KIAA1324	UPF0577 protein KIAA1324	22.6108	22.5574	0.963663	17.2885	19.1728	17.3638	3.50399	23.8044	23.1739	0.645953		591001	0.0274152			0.0960625
3830	MSVCTDNVTDLRIPEGESGFSK	Q6UXG2	KIAA1324	UPF0577 protein KIAA1324	20.909	17.3846	0.086906	18.1691	16.8362	16.2198	1.53304	21.8372	25.8736	16.4088		117004	0.00542755			0.00832068
3829	MSVCTDNVTDLR	Q6UXG2	KIAA1324	UPF0577 protein KIAA1324	25.4778	26.8684	2.62188	17.7311	17.4559	18.4032	0.518602	26.3527	27.5691	2.32366		179783	0.00833974			0.00432501
358	APDSNCSNLLITTR	A2RU67	KIAA1467	Uncharacterized protein KIAA1467	22.2838	22.9766	1.61642	22.3931	21.8004	21.6358	1.12086	18.6753	20.8746	4.59256		3.65237e+06	0.169425			0.189901
3795	MLSAFNATSGK	A2RU67	KIAA1467	Uncharacterized protein KIAA1467	15.7976	20.4689	25.4801	17.9013	17.6293	20.5396	0.133019	17.9134	18.4078	1.40873		202744	0.00940483			0.00125102
4965	STQGFLNGSEVSELLR	Q9HCM3	KIAA1549	UPF0606 protein KIAA1549	20.8118	21.3652	1.46754	17.4288	17.5809	18.4691	0.540288	20.5548	19.3281	0.427294		196055	0.00909455			0.00491367
2285	IDGGPVILLQAGTPHNLTCR	Q96J84	KIRREL	Kin of IRRE-like protein 1	18.2422	17.6378	0.657745	24.5399	24.2319	23.8846	1.27218	17.1098	23.2883	72.4292		1.97028e+07	0.913969			1.16273
5637	VGSTNVSTLVNVHFAPR	Q96J84	KIRREL	Kin of IRRE-like protein 1	16.2243	17.9108	3.21875	24.4407	23.8059	23.6816	1.08998	22.491	23.2295	1.66844		1.46653e+07	0.680288			0.7415
1624	FSNISEGLSNYSIIDK	P21583	KITLG	Kit ligand;Soluble KIT ligand	18.0547	17.9175	0.909282	19.339	17.2205	16.8291	1.31167	18.8448	21.4971	6.28669		152717	0.00708419			0.00929208
632	DCSANTTSCHILGWGK	Q92876	KLK6	Kallikrein-6	17.7593	23.7348	62.9223	17.7778	17.0966	16.6182	1.3932	18.1524	19.4386	2.43885		140149	0.00650118			0.00905743
715	DHVVVPANTTSVILSGLR	P32004	L1CAM	Neural cell adhesion molecule L1	17.1636	19.6178	5.48009	20.7859	20.9309	20.3348	1.51162	17.6987	19.0449	2.54242		1.99907e+06	0.0927324			0.140177
1440	FFPYANGTLGIR	P32004	L1CAM	Neural cell adhesion molecule L1	21.4991	21.8758	1.29837	18.1428	24.5766	24.1356	1.35754	20.8435	22.0404	2.29247		2.50204e+07	1.16064			1.57562
1748	GEGNETTNMVITWKPLR	P32004	L1CAM	Neural cell adhesion molecule L1	22.7538	20.5843	0.222288	22.2409	24.3838	24.1887	1.1448	19.5499	20.5869	2.05196		2.18905e+07	1.01545			1.16249
2505	ILTADNQTYMAVQGSTAYLLCK	P32004	L1CAM	Neural cell adhesion molecule L1	18.4157	21.7898	10.3682	23.6918	23.7291	23.5349	1.14409	20.9877	22.0481	2.08551		1.3905e+07	0.645021			0.737962
5178	THNLTDLSPHLR	P32004	L1CAM	Neural cell adhesion molecule L1	21.7806	21.67	0.926203	23.4428	23.6502	23.4896	1.11775	21.1999	22.3616	2.23721		1.3165e+07	0.610692			0.682603
3238	LLFPTNSSSHLVALQGQPLVLECIAEGFPTPTIK	P32004	L1CAM	Neural cell adhesion molecule L1	24.7879	15.2627	0.00135715	23.8876	24.8256	25.0161	0.876302	16.0812	17.2334	2.22253		2.97338e+07	1.37928			1.20867
1041	EELGVTVYQSPHSGSFTITGNNSNFAQR	P32004	L1CAM	Neural cell adhesion molecule L1	17.791	20.6063	7.03866	23.3735	22.5768	22.7983	0.857673	20.7816	19.5148	0.415581		6.25596e+06	0.2902			0.248897
2089	GYNVTYWR	P32004	L1CAM	Neural cell adhesion molecule L1	20.1948	20.2949	1.07185	22.7354	22.9252	23.1723	0.842588	19.4518	20.5038	2.0734		7.96476e+06	0.369467			0.311309
1985	GSGPASEFTFSTPEGVPGHPEALHLECQSNTSLLLR	P32004	L1CAM	Neural cell adhesion molecule L1	23.1493	18.2441	0.0333724	24.6008	16.5642	16.9918	0.743498	17.8863	18.121	1.17666		96899.4	0.00449494			0.00334198
3633	LVIHSLDYSDQGNYSCVASTELDVVESR	P32004	L1CAM	Neural cell adhesion molecule L1	20.8361	21.8387	2.00361	23.0924	17.9529	22.3725	0.046727	20.3625	21.5561	2.28723		253724	0.0117697			0.000549961
1559	FNISTPAFR	Q16787	LAMA3	Laminin subunit alpha-3	18.4677	18.7433	1.2105	20.3698	19.3242	17.3982	3.8	19.0496	20.1969	2.21499		656393	0.0304486			0.115705
1315	EVIDTNLTTLR	Q16787	LAMA3	Laminin subunit alpha-3	16.8487	20.8772	16.3192	21.2918	21.2227	20.8656	1.28085	19.5289	21.1982	3.1806		2.4472e+06	0.11352			0.145402
1091	EGSLPGNSTISIR	Q16787	LAMA3	Laminin subunit alpha-3	18.0262	18.6853	1.5791	20.3311	16.96	17.9919	0.489066	18.849	20.6152	3.40157		127488	0.00591387			0.00289227
4278	PGAMNFSYSPLLR	O15230	LAMA5	Laminin subunit alpha-5	22.3149	22.5846	1.20556	21.4969	21.7043	17.6295	16.8514	22.4441	23.4008	1.94087		3.417e+06	0.158507			2.67107
4552	RLNTTGVSAGCTADLLVGR	O15230	LAMA5	Laminin subunit alpha-5	17.6355	18.8293	2.28754	19.707	18.2977	16.2378	4.16957	18.406	22.5534	17.7211		322223	0.0149472			0.0623234
391	AQQLLANSTALEEAMLQEQQR	O15230	LAMA5	Laminin subunit alpha-5	23.2325	23.8072	1.48937	16.1506	18.0015	15.9885	4.03621	23.5186	24.5493	2.04302		262417	0.0121729			0.0491324
5264	TLSELMSQTGHLGLANASAPSGEQLLR	O15230	LAMA5	Laminin subunit alpha-5	23.4022	23.4156	1.00933	19.963	21.9912	20.8238	2.24607	24.1563	25.4059	2.37775		4.1688e+06	0.193381			0.434346
6051	VWQGHANASFCPHGYGCR	O15230	LAMA5	Laminin subunit alpha-5	17.8517	17.922	1.04993	19.5789	18.8393	17.9099	1.90448	17.9281	22.3124	20.8836		469023	0.0217569			0.0414357
1838	GINASSMAWAR	O15230	LAMA5	Laminin subunit alpha-5	19.8639	18.458	0.377383	18.4794	18.6029	18.0088	1.50953	17.7958	21.4503	12.5926		398136	0.0184686			0.0278789
3336	LNASIADLQSQLR	O15230	LAMA5	Laminin subunit alpha-5	24.0324	23.9749	0.960928	22.7898	22.3686	22.1046	1.2008	23.8751	25.0507	2.25887		5.41526e+06	0.251202			0.301644
828	DNATLQATLHAAR	O15230	LAMA5	Laminin subunit alpha-5	22.0756	22.5315	1.37164	21.6126	21.6458	21.4182	1.17089	22.2321	23.9358	3.25735		3.28122e+06	0.152208			0.178218
3388	LNTTGVSAGCTADLLVGR	O15230	LAMA5	Laminin subunit alpha-5	23.0771	23.2215	1.10527	22.1805	22.0093	21.807	1.15053	23.5266	24.196	1.59041		4.22143e+06	0.195822			0.2253
2042	GVHNASLALSASIGR	O15230	LAMA5	Laminin subunit alpha-5	20.1538	20.4245	1.20639	19.4576	18.1113	18.5827	0.721264	20.0051	21.7295	3.30443		283168	0.0131355			0.00947419
3627	LVGGPVAGGDPNQTIR	O15230	LAMA5	Laminin subunit alpha-5	17.4148	17.9339	1.43306	18.1604	17.6332	20.8399	0.108315	17.1113	23.3108	73.4912		203293	0.00943029			0.00102144
5824	VNASTTEPNSTVEQSALMR	P07942	LAMB1	Laminin subunit beta-1	17.6772	18.9811	2.46895	18.3216	21.3542	16.9232	21.5707	18.5624	24.4338	58.542		2.68074e+06	0.124353			2.68239
3751	MEMPSTPQQLQNLTEDIR	P07942	LAMB1	Laminin subunit beta-1	18.4616	17.1967	0.416128	19.615	19.003	19.2246	0.857614	21.8579	22.8368	1.97096		525379	0.0243711			0.020901
4189	NTSAASTAQLVEATEELRR	P55268	LAMB2	Laminin subunit beta-2	21.6329	22.5963	1.9499	22.6056	22.6397	22.2106	1.34639	18.4461	24.3691	60.6737		6.53475e+06	0.303132			0.408135
4509	RANTSALAVPSPVSNSASAR	P55268	LAMB2	Laminin subunit beta-2	17.7742	18.4453	1.59229	17.3942	17.6672	17.3319	1.26164	19.8439	22.6103	6.80408		208141	0.00965517			0.0121814
350	ANTSALAVPSPVSNSASAR	P55268	LAMB2	Laminin subunit beta-2	21.9459	21.9968	1.03591	19.9092	21.157	20.9778	1.13226	22.273	22.3145	1.02918		2.33825e+06	0.108466			0.122812
2877	LALNLTLR	P55268	LAMB2	Laminin subunit beta-2	22.2313	22.6735	1.35867	21.6268	21.7695	21.7935	0.983502	22.4321	22.5201	1.0629		3.57497e+06	0.165835			0.163099
4188	NTSAASTAQLVEATEELR	P55268	LAMB2	Laminin subunit beta-2	21.1238	21.9045	1.71796	17.4275	18.3828	19.0288	0.63905	19.4414	22.5872	8.85075		341802	0.0158554			0.0101324
3867	NATASLWSGPGLEDR	Q13751	LAMB3	Laminin subunit beta-3	17.4673	19.3905	3.79263	19.0287	23.4383	18.0073	43.1414	19.3815	18.4469	0.523188		1.13666e+07	0.527271			22.7472
3485	LRNATASLWSGPGLEDR	Q13751	LAMB3	Laminin subunit beta-3	17.7562	18.071	1.24384	20.3055	19.0266	17.5311	2.81962	19.4408	18.468	0.509516		534044	0.0247731			0.0698507
5053	TANDTSTEAYNLLLR	P11047	LAMC1	Laminin subunit gamma-1	20.829	17.7278	0.116532	24.956	24.8437	24.2119	1.5495	17.7622	21.0136	9.52289		3.01092e+07	1.3967			2.16418
5220	TLAGENQTAFEIEELNR	P11047	LAMC1	Laminin subunit gamma-1	23.574	24.2823	1.63388	24.0929	23.8974	23.3661	1.44523	22.6714	23.9415	2.41178		1.56255e+07	0.724832			1.04755
5221	TLAGENQTAFEIEELNRK	P11047	LAMC1	Laminin subunit gamma-1	20.0539	20.5354	1.39619	23.2548	23.0605	22.6448	1.33395	20.5202	18.6687	0.277104		8.74787e+06	0.405794			0.541307
5850	VNNTLSSQISR	P11047	LAMC1	Laminin subunit gamma-1	21.857	22.1784	1.24954	23.3081	23.1259	22.8104	1.24444	21.3815	22.3003	1.89054		9.15355e+06	0.424612			0.528406
5477	VAAANVSVTQPESTGDPNNMTLLAEEAR	P11047	LAMC1	Laminin subunit gamma-1	22.7234	17.4129	0.0251988	24.4314	24.8054	24.6542	1.11049	23.3738	24.3367	1.94922		2.93204e+07	1.3601			1.51039
4479	QVLSYGQNLSFSFR	P11047	LAMC1	Laminin subunit gamma-1	21.9933	22.3275	1.26068	23.309	22.4043	22.4139	0.993368	21.7284	21.6556	0.950791		5.55094e+06	0.257495			0.255788
2563	IPAINQTITEANEK	P11047	LAMC1	Laminin subunit gamma-1	22.7753	16.6175	0.0140061	22.6376	22.2274	22.244	0.98856	21.3608	20.963	0.759015		4.91037e+06	0.227781			0.225175
454	ATYGEYSTGYIDNVTLISAR	Q13753	LAMC2	Laminin subunit gamma-2	16.2429	20.9701	26.4868	21.7779	21.507	17.5758	15.2549	16.8449	18.6375	3.46439		2.98025e+06	0.138247			2.10894
1231	ENTSDPSLVIAFGR	P11279	LAMP1	Lysosome-associated membrane glycoprotein 1	27.6903	28.6256	1.91229	28.3347	28.1859	27.6748	1.42514	29.3376	29.6572	1.24798		3.05352e+08	14.1646			20.1865
4737	SGPKNMTFDLPSDATVVLNR	P11279	LAMP1	Lysosome-associated membrane glycoprotein 1	21.5518	19.9431	0.327894	17.8108	21.3474	21.1454	1.15029	22.6826	23.851	2.24762		2.66813e+06	0.123769			0.14237
6372	YSVQLMSFVYNLSDTHLFPNASSK	P11279	LAMP1	Lysosome-associated membrane glycoprotein 1	26.691	28.3551	3.16916	27.5729	27.0654	26.8983	1.1228	26.0389	26.8012	1.69619		1.40442e+08	6.51479			7.3148
4927	SSCGKENTSDPSLVIAFGR	P11279	LAMP1	Lysosome-associated membrane glycoprotein 1	25.9367	26.7789	1.79278	27.2966	27.2188	27.1123	1.07661	24.6717	26.2317	2.94854		1.56198e+08	7.24566			7.80078
4898	SPSVDKYNVSGTNGTCLLASMGLQLNLTYER	P11279	LAMP1	Lysosome-associated membrane glycoprotein 1	24.136	24.9205	1.7225	23.9675	23.7027	23.6416	1.04326	25.8414	26.8769	2.04982		1.36529e+07	0.633325			0.660723
1816	GHTLTLNFTR	P11279	LAMP1	Lysosome-associated membrane glycoprotein 1	23.7164	24.5261	1.75285	25.3922	25.0477	25.0547	0.99516	26.0446	27.3176	2.41664		3.46824e+07	1.60884			1.60105
6326	YNVSGTNGTCLLASMGLQLNLTYER	P11279	LAMP1	Lysosome-associated membrane glycoprotein 1	23.685	24.754	2.09798	23.6074	23.0968	23.2706	0.886505	25.4737	25.2556	0.859697		8.97077e+06	0.416133			0.368904
4103	NMTFDLPSDATVVLNR	P11279	LAMP1	Lysosome-associated membrane glycoprotein 1	28.6052	29.4868	1.84242	29.0115	28.947	29.2567	0.80681	30.769	31.8105	2.05837		5.17506e+08	24.0059			19.3682
5447	TVTISDHGTVTYNGSICGDDQNGPK	P13473	LAMP2	Lysosome-associated membrane glycoprotein 2	24.3846	24.5131	1.09316	25.6235	25.4024	24.7146	1.61083	24.834	25.2728	1.35548		4.43491e+07	2.05725			3.31387
5894	VQPFNVTQGK	P13473	LAMP2	Lysosome-associated membrane glycoprotein 2	27.4855	28.164	1.60047	27.1481	27.0258	26.7791	1.18649	26.9741	27.8595	1.84728		1.3664e+08	6.3384			7.52044
6114	WQMNFTVR	P13473	LAMP2	Lysosome-associated membrane glycoprotein 2	26.824	26.2464	0.670078	26.3612	26.4352	26.2147	1.16514	26.0457	27.1988	2.22391		9.07378e+07	4.20912			4.9042
2273	IAVQFGPGFSWIANFTK	P13473	LAMP2	Lysosome-associated membrane glycoprotein 2	23.4717	26.4741	8.01332	26.6875	23.707	25.059	0.391749	26.2116	26.8299	1.53507		1.36936e+07	0.635215			0.248845
5149	TGIYQVLNGSR	Q9UQV4	LAMP3	Lysosome-associated membrane glycoprotein 3	21.1373	22.2818	2.2107	20.8014	20.2766	20.0035	1.2084	23.5984	24.7197	2.17543		1.27018e+06	0.0589207			0.0711998
5018	SYNVTSVLFR	P80188	LCN2	Neutrophil gelatinase-associated lipocalin	17.6661	17.4586	0.866037	20.2706	21.8452	21.5416	1.23422	17.7525	19.3582	3.04343		3.76756e+06	0.174769			0.215703
823	DMSDEVGCVNVTLCEGPNK	P01130	LDLR	Low-density lipoprotein receptor	22.5486	24.6503	4.29215	25.3975	24.807	24.6437	1.11985	22.5078	24.486	3.94001		2.93529e+07	1.36161			1.5248
543	CIPVMEAQEYIANVTSSSSAK	Q8NC56	LEMD2	LEM domain-containing protein 2	19.1108	15.987	0.114721	22.6314	22.8745	22.6075	1.2033	17.4376	24.7012	153.66		7.68972e+06	0.356709			0.429229
576	CVGFGPEEELTNITDVQFLQSTR	Q9Y2U8	LEMD3	Inner nuclear membrane protein Man1	19.6667	20.6755	2.01224	19.6106	19.7721	19.5129	1.19681	21.2557	17.1976	0.060033		895355	0.0415335			0.0497079
5869	VPLQSAHLYYNVTEK	Q32P28	LEPRE1	Prolyl 3-hydroxylase 1	16.8105	18.3734	2.95447	27.2799	26.5899	26.6763	0.94187	19.1809	24.4871	39.5663		1.01008e+08	4.68555			4.41318
1029	EEAMLYHNQTAELR	Q92791	LEPREL4	Synaptonemal complex protein SC65	17.3662	19.9911	6.16842	17.8846	19.8997	19.8484	1.0362	21.915	22.9572	2.05937		978153	0.0453743			0.0470167
1237	EPGSNVTMSVDAECVPMVR	Q08380	LGALS3BP	Galectin-3-binding protein	24.1022	24.1947	1.06622	24.5065	24.4611	24.0454	1.33395	24.9569	26.5046	2.92351		2.30954e+07	1.07134			1.42911
259	ALGFENATQALGR	Q08380	LGALS3BP	Galectin-3-binding protein	27.1231	27.5231	1.31951	28.3716	28.5429	28.2121	1.25771	28.4281	28.9998	1.48627		3.91083e+08	18.1415			22.8167
1885	GLNLTEDTYKPR	Q08380	LGALS3BP	Galectin-3-binding protein	26.1676	26.5126	1.27015	27.3099	27.0119	26.6921	1.24816	27.3812	27.1276	0.838801		1.35329e+08	6.27762			7.83546
18	AAIPSALDTNSSK	Q08380	LGALS3BP	Galectin-3-binding protein	25.6171	25.9261	1.23885	26.8441	26.8756	26.7137	1.11876	27.0641	27.3541	1.22264		1.23129e+08	5.71169			6.39001
5421	TVIRPFYLTNSSGVD	Q08380	LGALS3BP	Galectin-3-binding protein	17.0961	21.9845	29.618	25.7566	26.0167	26.3146	0.813436	22.7568	25.1328	5.19096		6.78902e+07	3.14927			2.56173
6253	YKGLNLTEDTYKPR	Q08380	LGALS3BP	Galectin-3-binding protein	17.1122	17.0412	0.951978	17.8729	23.3295	24.1211	0.577703	19.0434	26.0568	129.194		1.05409e+07	0.48897			0.282479
794	DLNETIHYMYK	Q99538	LGMN	Legumain	21.0129	21.2154	1.15069	21.8863	21.9362	21.5702	1.28877	22.4266	23.7349	2.4765		4.01286e+06	0.186147			0.239902
3338	LNATADILR	P15018	LIF	Leukemia inhibitory factor	16.3615	17.834	2.77502	20.9694	20.7263	20.4008	1.2531	16.623	19.0304	5.30517		1.73475e+06	0.0804713			0.100838
4911	SQSTILVNITEK	P42702	LIFR	Leukemia inhibitory factor receptor	17.4895	18.5185	2.04061	21.7721	21.6278	21.5667	1.04326	17.0731	17.7397	1.58733		3.24053e+06	0.150321			0.156824
5871	VPSNSTETVIESDEFRPGIR	P42702	LIFR	Leukemia inhibitory factor receptor	18.5597	18.9897	1.34723	18.2862	20.6483	20.7195	0.951846	18.544	18.6728	1.09338		1.64345e+06	0.0762361			0.072565
4281	PGNLSRPPPVVVPHQPR	Q9BU23	LMF2	Lipase maturation factor 2	22.5381	19.1862	0.0979439	24.5261	24.809	20.2926	22.8861	23.2124	24.6339	2.67864		2.93936e+07	1.3635			31.2053
4625	SANSTLAQALHWTR	Q9BU23	LMF2	Lipase maturation factor 2	24.1769	24.716	1.45307	26.2745	26.0959	25.9061	1.14061	24.8732	26.0847	2.31578		7.17214e+07	3.32699			3.79478
877	DSLNSSHPISSSVQSSEQIEEMFDSLSYFK	Q9UIQ6	LNPEP	Leucyl-cystinyl aminopeptidase;Leucyl-cystinyl aminopeptidase, pregnancy serum form	22.5639	17.3879	0.0276611	24.548	24.4702	17.6008	116.922	25.1286	26.5197	2.62279		2.32415e+07	1.07812			126.056
6173	YELSLHPNLTSMTFR	Q9UIQ6	LNPEP	Leucyl-cystinyl aminopeptidase;Leucyl-cystinyl aminopeptidase, pregnancy serum form	20.8314	24.9251	17.0737	22.5443	24.9213	20.7275	18.3004	26.2843	26.4172	1.0965		3.1773e+07	1.47388			26.9725
1050	EETLLYDSNTSSMADRK	Q9UIQ6	LNPEP	Leucyl-cystinyl aminopeptidase;Leucyl-cystinyl aminopeptidase, pregnancy serum form	16.0204	17.0788	2.08262	17.9791	21.1446	20.4317	1.6391	19.9093	23.5455	12.4338		2.31824e+06	0.107538			0.176265
3006	LFDDWMASNGTQSLPTDVMTTVFK	Q9UIQ6	LNPEP	Leucyl-cystinyl aminopeptidase;Leucyl-cystinyl aminopeptidase, pregnancy serum form	19.2113	24.3416	35.0247	18.854	23.0389	22.585	1.36974	25.2556	26.2534	1.99695		8.61787e+06	0.399763			0.547571
1049	EETLLYDSNTSSMADR	Q9UIQ6	LNPEP	Leucyl-cystinyl aminopeptidase;Leucyl-cystinyl aminopeptidase, pregnancy serum form	24.508	25.2461	1.66798	24.9774	24.9465	24.8087	1.10023	26.1979	27.0812	1.84459		3.23329e+07	1.49985			1.65017
4143	NQSIGLIQPFATNGK	Q9UIQ6	LNPEP	Leucyl-cystinyl aminopeptidase;Leucyl-cystinyl aminopeptidase, pregnancy serum form	20.1831	20.4439	1.19814	24.1565	24.3416	24.2049	1.09939	24.3868	26.5093	4.35448		2.12594e+07	0.986177			1.08419
4073	NLSQDVNGTLVSIYAVPEK	Q9UIQ6	LNPEP	Leucyl-cystinyl aminopeptidase;Leucyl-cystinyl aminopeptidase, pregnancy serum form	17.4363	21.125	12.8946	25.2833	23.5074	23.8224	0.803851	25.4113	26.833	2.67901		1.19243e+07	0.55314			0.444643
4739	SGVINLTEEVLWVK	Q9UIQ6	LNPEP	Leucyl-cystinyl aminopeptidase;Leucyl-cystinyl aminopeptidase, pregnancy serum form	20.3069	24.9917	25.7197	19.3697	16.1267	19.9389	0.0711891	22.5824	23.1202	1.45176		71551.8	0.00331912			0.000236285
846	DPGAAVPGAANASAQQPR	P28300	LOX	Protein-lysine 6-oxidase	17.2226	16.2866	0.52268	22.1529	22.7106	22.309	1.32097	17.4112	19.3832	3.92312		6.86391e+06	0.318401			0.420599
98	AENQTAPGEVPALSNLRPPSR	P28300	LOX	Protein-lysine 6-oxidase	18.9364	17.8078	0.457359	23.9989	24.1614	24.2513	0.939588	19.1681	18.9838	0.880076		1.87632e+07	0.87038			0.817799
4516	RDPGAAVPGAANASAQQPR	P28300	LOX	Protein-lysine 6-oxidase	17.8928	17.7354	0.89664	20.2208	17.1604	20.6294	0.0903081	18.5422	16.7945	0.297776		146486	0.00679513			0.000613656
4231	NVTCENGLPAVVSCVPGQVFSPDGPSR	Q9Y4K0	LOXL2	Lysyl oxidase homolog 2	18.4448	18.5253	1.05738	23.2694	22.7342	16.7245	64.4318	19.4675	19.6057	1.10053		6.97712e+06	0.323653			20.8535
4808	SLGQFLSTENATIK	O95490	LPHN2	Latrophilin-2	17.0103	17.738	1.656	22.1131	18.0513	21.8043	0.074171	19.4235	18.5174	0.533626		271633	0.0126004			0.000934588
4830	SLNLSYNK	Q96JA1	LRIG1	Leucine-rich repeats and immunoglobulin-like domains protein 1	16.9439	18.1917	2.37479	17.8101	18.277	18.4396	0.893414	21.1719	21.4214	1.1888		317633	0.0147343			0.0131638
1168	ELILNTSSLLCDCHLK	O94898	LRIG2	Leucine-rich repeats and immunoglobulin-like domains protein 2	18.3006	19.1816	1.84165	21.0169	18.1368	19.9621	0.282182	17.6748	18.7941	2.17242		288218	0.0133698			0.00377271
3468	LQQLHLNTSSLLCDCQLK	Q6UXM1	LRIG3	Leucine-rich repeats and immunoglobulin-like domains protein 3	17.2947	19.0787	3.4438	18.4868	18.9501	17.0585	3.71047	18.208	22.7522	23.3314		506464	0.0234937			0.0871726
3357	LNGTDPIVAADSK	Q07954	LRP1	Prolow-density lipoprotein receptor-related protein 1;Low-density lipoprotein receptor-related protein 1 85 kDa subunit;Low-density lipoprotein receptor-related protein 1 515 kDa subunit;Low-density lipoprotein receptor-related protein 1 intracellular domain	21.3107	17.9766	0.0991599	20.4391	20.7893	16.2944	22.5476	16.391	21.4261	32.7881		1.81219e+06	0.0840632			1.89542
3721	LYWISSGNHTINR	Q07954	LRP1	Prolow-density lipoprotein receptor-related protein 1;Low-density lipoprotein receptor-related protein 1 85 kDa subunit;Low-density lipoprotein receptor-related protein 1 515 kDa subunit;Low-density lipoprotein receptor-related protein 1 intracellular domain	17.9128	17.0698	0.557483	20.4249	20.8881	18.3959	5.62635	17.9042	21.7777	14.6568		1.94064e+06	0.0900218			0.506494
6124	WTGHNVTVVQR	Q07954	LRP1	Prolow-density lipoprotein receptor-related protein 1;Low-density lipoprotein receptor-related protein 1 85 kDa subunit;Low-density lipoprotein receptor-related protein 1 515 kDa subunit;Low-density lipoprotein receptor-related protein 1 intracellular domain	17.716	18.8535	2.19999	17.9885	19.1725	17.8992	2.41714	20.0837	18.4323	0.318331		590878	0.0274095			0.0662525
3766	MHLNGSNVQVLHR	Q07954	LRP1	Prolow-density lipoprotein receptor-related protein 1;Low-density lipoprotein receptor-related protein 1 85 kDa subunit;Low-density lipoprotein receptor-related protein 1 515 kDa subunit;Low-density lipoprotein receptor-related protein 1 intracellular domain	20.4749	20.0192	0.729156	18.9734	19.2736	18.2187	2.07757	16.1722	20.1854	16.1471		633770	0.0293991			0.0610789
826	DNATDSVPLR	Q07954	LRP1	Prolow-density lipoprotein receptor-related protein 1;Low-density lipoprotein receptor-related protein 1 85 kDa subunit;Low-density lipoprotein receptor-related protein 1 515 kDa subunit;Low-density lipoprotein receptor-related protein 1 intracellular domain	22.0626	21.5223	0.687628	19.1772	20.8347	20.5175	1.24591	21.4568	21.9655	1.42277		1.87012e+06	0.0867506			0.108083
841	DNTTCYEFK	Q07954	LRP1	Prolow-density lipoprotein receptor-related protein 1;Low-density lipoprotein receptor-related protein 1 85 kDa subunit;Low-density lipoprotein receptor-related protein 1 515 kDa subunit;Low-density lipoprotein receptor-related protein 1 intracellular domain	20.7208	19.8031	0.529352	19.4634	19.41	19.1524	1.19549	19.715	19.9628	1.1874		696614	0.0323143			0.0386314
563	CNASSQFLCSSGR	Q07954	LRP1	Prolow-density lipoprotein receptor-related protein 1;Low-density lipoprotein receptor-related protein 1 85 kDa subunit;Low-density lipoprotein receptor-related protein 1 515 kDa subunit;Low-density lipoprotein receptor-related protein 1 intracellular domain	19.7753	19.3173	0.727995	18.3686	18.6699	18.4175	1.19119	19.1027	19.7621	1.57943		417061	0.0193465			0.0230453
2323	IETILLNGTDR	Q07954	LRP1	Prolow-density lipoprotein receptor-related protein 1;Low-density lipoprotein receptor-related protein 1 85 kDa subunit;Low-density lipoprotein receptor-related protein 1 515 kDa subunit;Low-density lipoprotein receptor-related protein 1 intracellular domain	23.2519	23.0644	0.878126	22.0133	22.2762	22.0531	1.16724	22.4295	23.0095	1.49485		5.07931e+06	0.235617			0.275022
1569	FNSTEYQVVTR	Q07954	LRP1	Prolow-density lipoprotein receptor-related protein 1;Low-density lipoprotein receptor-related protein 1 85 kDa subunit;Low-density lipoprotein receptor-related protein 1 515 kDa subunit;Low-density lipoprotein receptor-related protein 1 intracellular domain	22.2093	22.0927	0.922359	20.8629	20.936	20.772	1.12039	21.3767	22.2279	1.804		2.00615e+06	0.0930608			0.104264
5073	TCVSNCTASQFVCK	Q07954	LRP1	Prolow-density lipoprotein receptor-related protein 1;Low-density lipoprotein receptor-related protein 1 85 kDa subunit;Low-density lipoprotein receptor-related protein 1 515 kDa subunit;Low-density lipoprotein receptor-related protein 1 intracellular domain	17.0775	18.7553	3.1994	20.2229	19.8416	19.8699	0.980575	20.3934	21.1498	1.68927		939543	0.0435833			0.0427367
3588	LTSCATNASICGDEAR	Q07954	LRP1	Prolow-density lipoprotein receptor-related protein 1;Low-density lipoprotein receptor-related protein 1 85 kDa subunit;Low-density lipoprotein receptor-related protein 1 515 kDa subunit;Low-density lipoprotein receptor-related protein 1 intracellular domain	21.7128	17.7873	0.0658123	20.4122	20.3539	20.471	0.922039	20.7239	21.7636	2.0558		1.34009e+06	0.0621638			0.0573174
5530	VDIPQQPMGIIAVANDTNSCELSPCR	Q07954	LRP1	Prolow-density lipoprotein receptor-related protein 1;Low-density lipoprotein receptor-related protein 1 85 kDa subunit;Low-density lipoprotein receptor-related protein 1 515 kDa subunit;Low-density lipoprotein receptor-related protein 1 intracellular domain	22.0605	20.9093	0.450251	17.9097	18.2176	19.6486	0.370874	19.8608	21.9825	4.35206		304820	0.0141399			0.00524413
5370	TSPANCTWLILGSK	Q7Z4F1	LRP10	Low-density lipoprotein receptor-related protein 10	22.8033	23.1706	1.28994	23.7963	23.8925	23.5092	1.30432	22.1695	23.6871	2.86314		1.55725e+07	0.722374			0.942208
4928	SSDNVSVTVLR	Q86VZ4	LRP11	Low-density lipoprotein receptor-related protein 11	18.709	22.3351	12.3471	19.9436	17.9054	17.0298	1.83477	18.9592	19.4944	1.44914		245506	0.0113885			0.0208952
4571	RPAPPAAVLGCYLFNCTAR	Q86VZ4	LRP11	Low-density lipoprotein receptor-related protein 11	17.1603	21.5285	20.6519	19.8179	18.7231	19.2971	0.671752	21.1614	22.1862	2.03468		432728	0.0200732			0.0134842
2541	INCSWFIR	Q9Y561	LRP12	Low-density lipoprotein receptor-related protein 12	17.9446	17.5632	0.767692	19.5662	19.9329	20.0847	0.900127	18.3293	17.0191	0.403265		1.00092e+06	0.0464305			0.0417934
5666	VIDLWDLAQSANLTDKELEAFR	P30533	LRPAP1	Alpha-2-macroglobulin receptor-associated protein	21.6304	22.6363	2.0082	22.653	20.8753	17.989	7.39372	21.5358	23.7956	4.78925		1.9235e+06	0.0892266			0.659716
5665	VIDLWDLAQSANLTDK	P30533	LRPAP1	Alpha-2-macroglobulin receptor-associated protein	26.8563	28.1455	2.44392	26.1036	26.1693	25.6465	1.43674	26.2282	26.4871	1.19657		7.54648e+07	3.50064			5.02951
5667	VIDLWDLAQSANLTDKELEAFREELK	P30533	LRPAP1	Alpha-2-macroglobulin receptor-associated protein	21.1629	22.9156	3.36989	18.7337	18.2764	21.7603	0.0893803	22.4983	25.4946	7.97951		317501	0.0147281			0.0013164
2066	GWAAPGPEPTYPNSTILPTPDTGPTGIK	Q8IWT6	LRRC8A	Volume-regulated anion channel subunit LRRC8A	16.0057	23.4664	176.155	18.1807	19.4707	16.6492	7.06897	22.7024	19.3924	0.10083		726549	0.0337029			0.238245
1926	GNTTTLISENGHAADTLTATNFR	Q14766	LTBP1	Latent-transforming growth factor beta-binding protein 1	20.6582	17.6708	0.126096	17.8044	21.8279	17.3617	22.1035	17.87	23.7808	60.1628		3.72265e+06	0.172685			3.81694
6397	YVQDQVAAPFQLSNHTGR	Q14766	LTBP1	Latent-transforming growth factor beta-binding protein 1	20.6715	18.0246	0.159663	17.2576	18.5145	16.8937	3.07546	22.0765	23.7502	3.19032		374472	0.0173709			0.0534235
869	DSCQQGSNMTLIGENGHSTDTLTGSGFR	Q9NS15	LTBP3	Latent-transforming growth factor beta-binding protein 3	18.0645	20.281	4.64765	19.1803	17.1675	16.0392	2.18601	19.0198	22.8541	14.2639		147208	0.00682866			0.0149275
1723	GCFDGNVTLTAANVTVSLPVR	O95274	LYPD3	Ly6/PLAUR domain-containing protein 3	24.0893	25.7495	3.1606	17.792	18.3143	16.4849	3.55389	22.1105	23.2382	2.1851		325952	0.0151202			0.0537354
981	EACQGTSPPVVSCYNASDHVYK	O95274	LYPD3	Ly6/PLAUR domain-containing protein 3	25.2605	26.1767	1.88714	17.7167	17.724	17.0267	1.62147	18.5578	24.8532	78.5424		216499	0.0100429			0.0162842
240	ALDPAGNESAYPPNGVECYSCVGLSR	O95274	LYPD3	Ly6/PLAUR domain-containing protein 3	22.5446	24.9899	5.44639	17.7341	17.6538	18.9047	0.420186	21.494	23.3843	3.70712		206216	0.00956591			0.00401946
992	EAGNHTSGAGLVQINK	P20645	M6PR	Cation-dependent mannose-6-phosphate receptor	27.1995	24.4865	0.152513	26.2626	26.262	26.087	1.12896	25.6669	26.9496	2.43294		8.04729e+07	3.73295			4.21437
3350	LNETHIFNGSNWIMLIYK	P20645	M6PR	Cation-dependent mannose-6-phosphate receptor	27.012	27.9813	1.95789	26.2244	25.3706	25.5861	0.861248	26.0432	26.8851	1.79241		4.33822e+07	2.0124			1.73318
370	APPRNYSVIVMFTALQLHR	Q9H0U3	MAGT1	Magnesium transporter protein 1	16.6669	17.2486	1.49661	20.9364	18.4508	20.4101	0.257153	18.1999	19.1103	1.87957		358298	0.0166206			0.00427405
886	DSVINLSESVEDGPK	Q16706	MAN2A1	Alpha-mannosidase 2	24.3829	24.8178	1.35182	25.2577	25.0066	24.4778	1.44273	25.0725	26.3022	2.34518		3.37083e+07	1.56365			2.25592
342	ANLTSMLIQR	P49641	MAN2A2	Alpha-mannosidase 2x	20.4236	21.4368	2.01838	18.2891	17.9936	18.668	0.626593	21.5692	21.4179	0.900439		260984	0.0121064			0.0075858
2973	LEHQFAVGEDSGRNLSAPVTLNLR	O00754	MAN2B1	Lysosomal alpha-mannosidase;Lysosomal alpha-mannosidase A peptide;Lysosomal alpha-mannosidase B peptide;Lysosomal alpha-mannosidase C peptide;Lysosomal alpha-mannosidase D peptide;Lysosomal alpha-mannosidase E peptide	16.8236	18.7016	3.67565	18.2726	21.6954	16.6671	32.6339	17.8138	23.6264	56.204		3.39599e+06	0.157532			5.14089
5332	TPLVQEVHQNFSAWCSQVVR	O00754	MAN2B1	Lysosomal alpha-mannosidase;Lysosomal alpha-mannosidase A peptide;Lysosomal alpha-mannosidase B peptide;Lysosomal alpha-mannosidase C peptide;Lysosomal alpha-mannosidase D peptide;Lysosomal alpha-mannosidase E peptide	16.9464	22.8601	60.2839	22.9167	21.6961	16.962	26.6138	23.5824	24.902	2.49597		3.39764e+06	0.157609			4.19456
2055	GVSEPLMENGSGAWVR	O00754	MAN2B1	Lysosomal alpha-mannosidase;Lysosomal alpha-mannosidase A peptide;Lysosomal alpha-mannosidase B peptide;Lysosomal alpha-mannosidase C peptide;Lysosomal alpha-mannosidase D peptide;Lysosomal alpha-mannosidase E peptide	19.1039	19.7895	1.60837	18.6712	19.9492	17.8141	4.39268	17.9787	20.2792	4.92628		1.0123e+06	0.0469581			0.206272
344	ANLTWSVK	O00754	MAN2B1	Lysosomal alpha-mannosidase;Lysosomal alpha-mannosidase A peptide;Lysosomal alpha-mannosidase B peptide;Lysosomal alpha-mannosidase C peptide;Lysosomal alpha-mannosidase D peptide;Lysosomal alpha-mannosidase E peptide	22.1634	22.6407	1.39214	22.8613	22.6803	22.3845	1.22757	23.5007	24.543	2.05951		6.72126e+06	0.311784			0.382735
708	DHFTFCQQLNISICPLSQTAAR	O00754	MAN2B1	Lysosomal alpha-mannosidase;Lysosomal alpha-mannosidase A peptide;Lysosomal alpha-mannosidase B peptide;Lysosomal alpha-mannosidase C peptide;Lysosomal alpha-mannosidase D peptide;Lysosomal alpha-mannosidase E peptide	19.498	17.6132	0.270781	20.6605	18.9809	18.9871	0.995712	16.7793	21.3808	24.2767		517393	0.0240007			0.0238977
3382	LNQTEPVAGNYYPVNTR	O00754	MAN2B1	Lysosomal alpha-mannosidase;Lysosomal alpha-mannosidase A peptide;Lysosomal alpha-mannosidase B peptide;Lysosomal alpha-mannosidase C peptide;Lysosomal alpha-mannosidase D peptide;Lysosomal alpha-mannosidase E peptide	21.9186	24.2351	4.98122	23.8975	23.599	23.72	0.91955	23.3438	26.1081	6.79418		1.27059e+07	0.5894			0.541982
6129	WWHQQTNATQEVVR	O00754	MAN2B1	Lysosomal alpha-mannosidase;Lysosomal alpha-mannosidase A peptide;Lysosomal alpha-mannosidase B peptide;Lysosomal alpha-mannosidase C peptide;Lysosomal alpha-mannosidase D peptide;Lysosomal alpha-mannosidase E peptide	17.092	21.3317	18.892	22.0166	21.0996	21.6291	0.692795	22.9419	22.7953	0.903377		2.24705e+06	0.104235			0.0722138
4059	NLSAPVTLNLR	O00754	MAN2B1	Lysosomal alpha-mannosidase;Lysosomal alpha-mannosidase A peptide;Lysosomal alpha-mannosidase B peptide;Lysosomal alpha-mannosidase C peptide;Lysosomal alpha-mannosidase D peptide;Lysosomal alpha-mannosidase E peptide	21.4616	22.1036	1.56049	17.9097	18.7273	22.0538	0.0996836	23.0369	24.4936	2.7448		433989	0.0201318			0.00200681
4582	RPYVSYVNNSIAR	Q9Y2E5	MAN2B2	Epididymis-specific alpha-mannosidase	21.8096	22.1541	1.26971	21.8254	22.0294	21.0606	1.95721	22.6105	24.162	2.93122		4.28065e+06	0.19857			0.388643
263	ALHALNVTWR	Q9Y2E5	MAN2B2	Epididymis-specific alpha-mannosidase	17.9315	17.2539	0.625204	18.1238	17.543	17.0369	1.42021	18.4444	20.3135	3.65305		190972	0.00885874			0.0125812
4102	NMTAQNYTYAIR	Q9Y2E5	MAN2B2	Epididymis-specific alpha-mannosidase	22.0636	22.6874	1.54093	21.9873	21.896	21.7628	1.09672	23.3708	24.9833	3.05781		3.90259e+06	0.181032			0.198542
5946	VTDEAGHPVPSQIQNSTETPSAYDLLILTTIPGLSYR	Q9Y2E5	MAN2B2	Epididymis-specific alpha-mannosidase	17.6436	16.3285	0.401898	17.7586	18.211	18.7868	0.670914	23.3243	24.2362	1.88152		303429	0.0140754			0.00944337
6128	WVSLDNWTYSK	O00462	MANBA	Beta-mannosidase	21.112	21.5439	1.34901	19.4636	19.2106	18.9838	1.17024	23.1906	24.3539	2.23969		606690	0.028143			0.0329339
1929	GNWSICNGNGSLELPGAVPGCVHSALFQQGLIQDSYYR	O00462	MANBA	Beta-mannosidase	21.7287	15.9902	0.0187301	18.8853	17.4168	17.5756	0.89577	24.1373	25.4347	2.45786		174976	0.00811675			0.00727074
2676	IVELFVNISK	O00462	MANBA	Beta-mannosidase	20.6966	22.2626	2.96083	18.3357	17.7229	18.1252	0.756651	23.5622	23.9223	1.28351		216334	0.0100352			0.00759317
6136	YAESDPTVPCNETR	Q14703	MBTPS1	Membrane-bound transcription factor site-1 protease	18.273	18.1792	0.937051	19.0688	17.2915	17.548	0.837116	20.7784	22.0452	2.40627		160421	0.00744154			0.00622944
4302	PQPLNETAPSNLWK	Q14703	MBTPS1	Membrane-bound transcription factor site-1 protease	15.9478	23.486	185.876	21.1954	17.4977	18.5344	0.487441	16.8819	24.003	139.208		185069	0.0085849			0.00418464
538	CGLSQSQGNLSHVDWFSVHK	P43121	MCAM	Cell surface glycoprotein MUC18	16.7308	17.851	2.17377	23.6903	23.5242	17.9553	47.4685	21.1136	21.785	1.59262		1.2064e+07	0.559619			26.5643
1790	GGGDPWTNGSGLALCQR	Q9GZU1	MCOLN1	Mucolipin-1	21.6534	19.3074	0.196691	23.2809	22.2848	22.2622	1.01579	23.0473	25.0446	3.99252		5.10967e+06	0.237026			0.240768
281	ALLTNVSSVALGSR	Q7Z7M0	MEGF8	Multiple epidermal growth factor-like domains protein 8	20.5235	20.3829	0.907142	19.1206	19.9662	16.1757	13.8374	21.5365	22.4772	1.91946		1.0243e+06	0.0475147			0.65748
5855	VNSTELFHVDR	Q7Z7M0	MEGF8	Multiple epidermal growth factor-like domains protein 8	17.2404	19.3115	4.20207	19.0354	19.4362	17.182	4.7707	20.7498	18.4542	0.203683		709380	0.0329065			0.156987
1938	GPGTLGWCVHNESCLPRPEQAR	Q7Z7M0	MEGF8	Multiple epidermal growth factor-like domains protein 8	17.7596	19.0041	2.36936	17.4414	17.2827	18.1262	0.55729	20.0916	20.5214	1.34705		159445	0.00739629			0.00412188
1173	ELLEEVGQNGSR	Q12866	MERTK	Tyrosine-protein kinase Mer	19.0993	19.8208	1.6489	20.8178	20.4072	20.4047	1.00173	18.063	18.6553	1.50765		1.39053e+06	0.0645033			0.0646152
341	ANLSGGVWK	P08581	MET	Hepatocyte growth factor receptor	17.6998	19.5439	3.59029	22.0416	22.0711	21.9927	1.05585	19.1751	19.3453	1.12521		4.40619e+06	0.204393			0.215808
2124	HFNMSIIISNGHGTTQYSTFSYVDPVITSISPK	P08581	MET	Hepatocyte growth factor receptor	16.3948	16.5529	1.11582	18.1038	21.4505	21.5763	0.916496	19.1442	19.5055	1.28458		2.86579e+06	0.132937			0.121836
5512	VAYSNDSANWTEYQDPR	Q08431	MFGE8	Lactadherin;Lactadherin short form;Medin	20.5134	21.1246	1.52753	22.1538	21.7818	21.7687	1.00912	17.9582	18.8233	1.82147		3.60558e+06	0.167255			0.16878
5917	VSNVSAASLVPAVPQPEADNLTLR	Q10469	MGAT2	Alpha-1,6-mannosyl-glycoprotein 2-beta-N-acetylglucosaminyltransferase	17.7821	20.1273	5.08131	18.3	16.5715	18.6442	0.237714	17.1403	22.449	39.6349		97390.9	0.00451774			0.00107393
2577	IQAIAQNVSDIAVK	Q3V5L5	MGAT5B	Alpha-1,6-mannosylglycoprotein 6-beta-N-acetylglucosaminyltransferase B	17.7998	16.0369	0.294655	20.6944	20.8692	20.9685	0.933486	18.567	18.8547	1.22069		1.91538e+06	0.0888501			0.0829403
2594	IQQESLGSAPLMGDDHPNASR	Q5JRA6	MIA3	Melanoma inhibitory activity protein 3	17.9454	18.1128	1.12303	19.5578	19.3916	16.7275	6.33832	21.5676	21.984	1.33459		687786	0.0319048			0.202223
2595	IQQESLGSAPLMGDDHPNASRDSVEGDALVNGAK	Q5JRA6	MIA3	Melanoma inhibitory activity protein 3	15.7824	17.9486	4.4884	18.0878	18.3507	17.402	1.93013	17.8416	23.1253	38.954		334281	0.0155065			0.0299296
405	ASGFYPWNITLSWR	Q29983	MICA	MHC class I polypeptide-related sequence A	20.0188	20.7439	1.65302	18.0636	17.7032	17.2975	1.32473	18.7991	20.1124	2.48509		213400	0.00989913			0.0131137
4669	SEASEGNITVTCR	Q29983	MICA	MHC class I polypeptide-related sequence A	23.5898	24.0527	1.37831	23.7822	23.6651	23.5343	1.0949	21.1507	22.8578	3.26504		1.33016e+07	0.617032			0.675589
393	AQTLAMNVTNFWK	Q29980	MICB	MHC class I polypeptide-related sequence B	22.3282	22.5596	1.17397	17.7256	20.3004	17.3483	7.73875	24.2703	25.9967	3.30901		1.29131e+06	0.0599007			0.463557
4012	NITLTWR	Q29980	MICB	MHC class I polypeptide-related sequence B	21.1604	21.9317	1.70681	22.5083	22.0633	22.1225	0.959796	22.8978	24.2714	2.59116		4.38243e+06	0.203291			0.195118
5435	TVPPMVNVTCSEVSEGNITVTCR	Q29980	MICB	MHC class I polypeptide-related sequence B	17.3604	18.7318	2.58722	18.4418	17.3833	19.3306	0.259301	21.5545	23.0273	2.7756		170960	0.00793045			0.00205637
6157	YDREPAEFNLTK	Q7Z6M3	MILR1	Allergin-1	17.2525	17.6929	1.35698	22.7915	22.1771	21.9584	1.16368	20.1906	18.3707	0.283241		4.74212e+06	0.219976			0.255983
1753	GEPAIFNLSITEAHESGPYK	Q7Z6M3	MILR1	Allergin-1	16.9549	18.2343	2.42738	22.669	21.8877	21.7304	1.1152	16.4667	17.4004	1.91017		3.8802e+06	0.179994			0.200729
3866	NATALYHVEAFK	Q9UNW1	MINPP1	Multiple inositol polyphosphate phosphatase 1	19.6323	20.7793	2.21453	22.0507	21.4339	18.3232	8.63802	21.0834	22.3968	2.48527		2.833e+06	0.131416			1.13518
1111	EIFVANGTQGK	O95297	MPZL1	Myelin protein zero-like protein 1	23.0925	23.332	1.18058	25.4622	25.2878	25.0561	1.17422	24.3072	25.4262	2.17196		4.09625e+07	1.90016			2.2312
3434	LQFDDNGTYTCQVK	O60487	MPZL2	Myelin protein zero-like protein 2	17.9006	16.0207	0.271703	18.5777	19.4831	19.0647	1.33644	22.5356	24.3382	3.48848		732820	0.0339939			0.0454309
5738	VLEAVNGTDAR	O60487	MPZL2	Myelin protein zero-like protein 2	23.2971	23.8539	1.471	18.4078	17.6572	18.3668	0.61149	22.1276	22.1888	1.04333		206703	0.00958848			0.00586326
2015	GTDPSLSPSPAALPPAPGTELSYLNGTFR	Q9UBG0	MRC2	C-type mannose receptor 2	21.9227	22.1588	1.1778	18.5911	18.082	17.8402	1.18247	18.1749	18.4314	1.19458		277475	0.0128714			0.0152201
5969	VTPACNTSLPAQR	Q9UBG0	MRC2	C-type mannose receptor 2	21.8513	21.526	0.798132	21.5386	21.455	21.2311	1.16789	19.2985	18.4582	0.558527		2.87474e+06	0.133353			0.155741
850	DPQGWVAGNLSAR	Q04912	MST1R	Macrophage-stimulating protein receptor;Macrophage-stimulating protein receptor alpha chain;Macrophage-stimulating protein receptor beta chain	21.281	21.7367	1.37145	22.0126	22.522	21.936	1.50108	23.5329	24.9192	2.61407		6.02279e+06	0.279383			0.419376
483	AVLVNGTECLLAR	Q04912	MST1R	Macrophage-stimulating protein receptor;Macrophage-stimulating protein receptor alpha chain;Macrophage-stimulating protein receptor beta chain	22.0666	22.6489	1.49723	22.7902	22.6563	22.3484	1.2379	24.6087	26.1821	2.97605		6.61037e+06	0.30664			0.379591
3954	NGTQLQNFTLDR	Q8WXI7	MUC16	Mucin-16	20.8652	21.6903	1.77166	18.3578	18.4295	17.0904	2.52993	18.2717	18.5737	1.23285		353047	0.016377			0.0414328
4167	NSSVGPLYSGCR	Q8WXI7	MUC16	Mucin-16	17.404	20.3328	7.61477	17.438	18.5477	18.1436	1.32326	17.3008	18.7938	2.81474		383190	0.0177753			0.0235214
4192	NTSVGLLYSGCR	Q8WXI7	MUC16	Mucin-16	17.51	20.5257	8.08753	18.079	17.1988	17.0264	1.12693	17.5956	17.9339	1.26427		150437	0.00697843	#VALUE!	#VALUE!	0.00786421	#VALUE!
4193	NTSVGPLYSGCR	Q8WXI7	MUC16	Mucin-16	20.3516	21.7024	2.55054	18.6919	17.3899	17.7452	0.781707	18.2094	19.6339	2.68421		171744	0.00796681			0.0101916
4194	NTSVSSLYSGCR	Q8WXI7	MUC16	Mucin-16	17.713	19.3651	3.14291	17.8581	16.8312	17.372	0.68739	17.6306	18.9095	2.42654		116599	0.00540878			0.00786857
1981	GSATFNSTEGVLQHLLR	Q8WXI7	MUC16	Mucin-16	19.8551	17.5116	0.197032	17.6408	17.4932	18.7766	0.410826	18.5361	18.8842	1.27288		184492	0.00855817			0.0208316
939	DVTALNVSTLK	Q99102	MUC4	Mucin-4;Mucin-4 alpha chain;Mucin-4 beta chain	18.2412	17.7674	0.720065	19.159	19.482	19.0625	1.33746	19.0262	18.7452	0.82302		732262	0.0339679			0.0253973
2929	LDGPTEQCPDPLPLPAGNCTDEEGICHR	Q9HC84	MUC5B	Mucin-5B	16.2045	24.9677	434.496	19.0747	18.3888	17.5037	1.84689	18.5155	18.371	0.904693		343226	0.0159215			0.00862068
720	DIECQAESFPNWTLAQVGQK	Q9HC84	MUC5B	Mucin-5B	20.6953	23.6903	7.97232	17.8913	18.9557	18.1721	1.72142	18.1412	18.7289	1.50285		508434	0.0235851			0.0137009
4480	QVNETWTLENCTVAR	Q9HC84	MUC5B	Mucin-5B	22.2973	24.2399	3.84398	17.0661	17.2513	17.0628	1.13958	18.7487	18.227	0.696551		156012	0.00723705			0.00635064
383	AQGLVLEASNGSVLINGQR	Q9HC84	MUC5B	Mucin-5B	21.9526	24.0797	4.36838	18.559	17.6779	18.5106	0.561477	17.2747	18.0488	1.71012		209690	0.00972705			0.017324
6013	VVLLDPKPVANVTCVNK	Q9HC84	MUC5B	Mucin-5B	23.5232	24.6958	2.25418	19.1458	18.1556	19.3372	0.440862	18.3698	20.362	3.97843		291998	0.0135451			0.0307242
441	ATNSTATPSSTLGTTR	Q9HC84	MUC5B	Mucin-5B	20.5253	21.1318	1.52256	18.287	18.1617	19.507	0.393572	18.8128	17.9271	0.541225		293235	0.0136025			0.0345617
2980	LELSASAFDDGNFSLLIR	Q9BRK3	MXRA8	Matrix-remodeling-associated protein 8	17.5079	18.412	1.87138	20.0778	16.6164	16.9808	0.776792	21.3023	20.4284	0.54567		100470	0.00466056			0.00599975
862	DRDNDSDDVESNLLLPAGIALR	Q9NZM1	MYOF	Myoferlin	17.3057	16.6294	0.625768	16.8129	18.0136	16.2925	3.29688	17.7575	18.8435	2.12285		264627	0.0122754			0.00372335
1572	FNVSLDSVPELR	Q02083	NAAA	N-acylethanolamine-hydrolyzing acid amidase;N-acylethanolamine-hydrolyzing acid amidase subunit alpha;N-acylethanolamine-hydrolyzing acid amidase subunit beta	22.9297	17.8935	0.0304756	23.4539	23.6033	23.1033	1.41421	17.9274	27.1754	608.031		1.27439e+07	0.591159			0.418012
4238	NVTNQIALLK	Q58DX5	NAALADL2	Inactive N-acetylated-alpha-linked acidic dipeptidase-like protein 2	21.4404	22.3212	1.8414	18.4009	16.7963	17.9726	0.442485	22.3271	23.2733	1.92679		113813	0.0052795			0.0119315
4578	RPSLQMNTSIWYNR	P54802	NAGLU	Alpha-N-acetylglucosaminidase;Alpha-N-acetylglucosaminidase 82 kDa form;Alpha-N-acetylglucosaminidase 77 kDa form	22.7769	23.4055	1.54606	20.4455	20.7045	17.5168	9.11157	24.8574	25.9845	2.18419		1.70874e+06	0.0792645			0.00869932
5609	VFPQVNVTK	P54802	NAGLU	Alpha-N-acetylglucosaminidase;Alpha-N-acetylglucosaminidase 82 kDa form;Alpha-N-acetylglucosaminidase 77 kDa form	21.712	22.3349	1.53997	18.5195	17.5197	17.9098	0.763077	23.7916	24.6185	1.77387		187912	0.00871682			0.0114233
4013	NITQIVGHSGCEAK	P41271	NBL1	Neuroblastoma suppressor of tumorigenicity 1	14.7663	18.955	18.2358	20.0751	18.5273	19.9485	0.373402	21.3248	21.5201	1.14496		377810	0.0175257			0.0469353
3911	NETTYENGQVTLVCDAEGEPIPEITWK	O15394	NCAM2	Neural cell adhesion molecule 2	18.0607	15.8668	0.21856	18.3903	18.784	16.8217	3.89683	25.517	18.1116	0.00589865		451385	0.0209387			0.00537328
399	ARLNWTSLLPASFTK	Q6PIU2	NCEH1	Neutral cholesterol ester hydrolase 1	17.8257	17.815	0.992611	20.4089	18.6255	18.2443	1.30242	19.1177	19.5089	1.31148		404421	0.0187602			0.014404
3399	LNWTSLLPASFTK	Q6PIU2	NCEH1	Neutral cholesterol ester hydrolase 1	23.1666	23.8345	1.58876	27.1287	26.7493	26.6148	1.09771	24.8946	25.6946	1.7411		1.12808e+08	5.23293			4.76712
5707	VIYNLTEK	Q969V3	NCLN	Nicalin	22.8422	23.2139	1.29388	24.3243	24.5748	24.1944	1.3017	17.2726	24.6749	169.166		2.49892e+07	1.15919			0.890519
3385	LNSSQEDPGTVYQCVVR	Q68D85	NCR3LG1	Natural cytotoxicity triggering receptor 3 ligand 1	17.8563	18.4369	1.49547	18.9637	16.8476	15.2879	2.94793	22.0941	22.6721	1.49278		117932	0.00547061			0.00185575
4865	SNFTLTAAR	Q68D85	NCR3LG1	Natural cytotoxicity triggering receptor 3 ligand 1	17.4173	18.4857	2.09711	18.4575	17.7809	18.063	0.822393	21.0399	21.4814	1.35802		225208	0.0104469			0.012703
819	DLYEYSWVQGPLHSNETDR	Q92542	NCSTN	Nicastrin	24.8468	24.1302	0.60853	25.0268	25.0195	24.4727	1.46084	25.7097	25.8804	1.1256		3.4011e+07	1.57769			1.07999
820	DLYEYSWVQGPLHSNETDRLPR	Q92542	NCSTN	Nicastrin	18.8352	18.1285	0.61272	16.8489	22.8695	22.4972	1.29441	22.2365	25.76	11.4995		7.66312e+06	0.355474			0.274622
345	ANNSWFQSILR	Q92542	NCSTN	Nicastrin	23.5784	23.0407	0.688868	24.5943	24.6481	24.3296	1.24703	20.7104	25.8055	34.1805		2.62916e+07	1.21961			0.978008
3283	LLNATHQIGCQSSISGDTGVIHVVEK	Q92542	NCSTN	Nicastrin	16.8422	24.8655	260.168	25.1696	25.1312	24.952	1.13226	25.8555	25.7825	0.950659		3.6749e+07	1.7047			1.50558
3999	NISGVVLADHSGAFHNK	Q92542	NCSTN	Nicastrin	16.4084	16.8595	1.36708	23.9089	23.6944	23.534	1.1176	23.7216	24.8836	2.23767		1.35745e+07	0.629692			0.563434
4575	RPNQSQPLPPSSLQR	Q92542	NCSTN	Nicastrin	17.0518	19.3242	4.83126	20.8534	20.7622	20.7394	1.01593	20.8054	21.5951	1.72871		1.77846e+06	0.0824989			0.0812053
314	ALYELAGGTNFSDTVQADPQTVTR	Q92542	NCSTN	Nicastrin	18.5336	23.7262	36.5703	25.2492	22.5581	24.0044	0.366961	24.6787	25.6974	2.02609		6.1754e+06	0.286462			0.780634
2988	LEPGPLPGDDWTIFQSNHSTYEPVLLASLRPAEPAVPGPVLR	P52849	NDST2	Bifunctional heparan sulfate N-deacetylase/N-sulfotransferase 2;Heparan sulfate N-deacetylase 2;Heparan sulfate N-sulfotransferase 2	16.1154	20.1746	16.6702	18.9508	17.6926	17.5014	1.14171	22.166	23.4879	2.49995		211838	0.00982667			0.00860695
1516	FLGITPFLNYTR	P52849	NDST2	Bifunctional heparan sulfate N-deacetylase/N-sulfotransferase 2;Heparan sulfate N-deacetylase 2;Heparan sulfate N-sulfotransferase 2	17.2055	19.932	6.61848	19.1726	19.0289	19.3447	0.803405	21.3334	22.6405	2.47444		534896	0.0248126			0.0308843
177	AHGDPVALNYTFYQVISASSQTPLALR	P52849	NDST2	Bifunctional heparan sulfate N-deacetylase/N-sulfotransferase 2;Heparan sulfate N-deacetylase 2;Heparan sulfate N-sulfotransferase 2	16.3958	17.4931	2.13954	19.4812	18.6285	19.0238	0.760331	17.8181	22.2106	21.0027		405263	0.0187992			0.0247251
1575	FNVTGTPEQYVPYSTTR	Q9UI09	NDUFA12	NADH dehydrogenase [ubiquinone] 1 alpha subcomplex subunit 12	18.7671	18.4419	0.798188	21.1081	21.0005	20.3917	1.52499	19.4911	21.1677	3.19674		2.09788e+06	0.0973158			0.063814
4761	SILTVTNVTQEHFGNYTCVAANK	Q7Z3B1	NEGR1	Neuronal growth regulator 1	19.0546	18.5936	0.726483	22.566	22.0692	16.6653	42.3386	18.8928	17.9139	0.507366		4.40039e+06	0.204124			0.00482123
2004	GSSVILNCSAYSEPSPK	Q92859	NEO1	Neogenin	21.1141	22.7616	3.1329	18.1692	18.8336	17.8223	2.01573	21.3275	22.1218	1.73424		467174	0.0216711			0.010751
5261	TLSDVPSAAPQNLSLEVR	Q92859	NEO1	Neogenin	18.8316	22.9286	17.1128	18.8292	18.8863	18.26	1.5436	21.7418	22.8055	2.09029		484555	0.0224774			0.0145617
3417	LPSGMLVISNATEGDGGLYR	Q92859	NEO1	Neogenin	21.7104	22.9212	2.31466	18.5114	18.02	19.241	0.428985	19.2146	22.8089	12.0779		265803	0.01233			0.0287423
5325	TPASDPHGDNLTYSVFYTK	Q92859	NEO1	Neogenin	17.661	17.5038	0.896764	19.6839	18.1763	20.08	0.267257	17.3671	23.6445	77.5686		296218	0.0137409			0.0514145
4071	NLSLDIGTEVFAPGPGSGIQK	Q99519	NEU1	Sialidase-1	18.4597	21.5784	8.68605	22.7036	21.6849	17.7564	15.2264	23.5286	23.7706	1.18263		3.37136e+06	0.15639			0.010271
6120	WSFSNGTSWR	Q99519	NEU1	Sialidase-1	21.4828	21.5926	1.07908	23.1385	23.1361	23.0396	1.06918	23.4869	24.6312	2.21039		9.2185e+06	0.427625			0.399957
3531	LSQDFMILWLHGENGTGPAK	Q5JS37	NHLRC3	NHL repeat-containing protein 3	17.9128	17.6828	0.852635	19.0734	20.1111	19.6412	1.38501	17.5253	23.5837	66.6439		1.13252e+06	0.0525348			0.0379309
6287	YLIVAQLNLSR	Q5JS37	NHLRC3	NHL repeat-containing protein 3	19.6644	19.593	0.951714	18.1918	17.5687	18.6554	0.470837	20.5946	21.6118	2.02399		194404	0.00901797			0.019153
795	DLNETLLR	Q13253	NOG	Noggin	16.7853	19.2709	5.60067	20.0629	19.7934	19.4437	1.2743	18.1998	17.8567	0.788346		908672	0.0421512			0.033078
4666	SDVEINYSLIEIK	Q5JPE7	NOMO2;NOMO1;NOMO3	Nodal modulator 2;Nodal modulator 1;Nodal modulator 3	18.0461	21.0498	8.02054	17.2597	18.2743	16.8884	2.61335	18.2326	21.1555	7.58369		317039	0.0147067			0.00562753
2983	LENITTGTYTIHAQK	Q5JPE7	NOMO2;NOMO1;NOMO3	Nodal modulator 2;Nodal modulator 1;Nodal modulator 3	24.6134	25.45	1.78584	24.7517	25.1114	25.0412	1.04986	24.3783	25.9376	2.94711		3.6248e+07	1.68146			1.6016
4163	NSSFHFLR	P46531	NOTCH1	Neurogenic locus notch homolog protein 1;Notch 1 extracellular truncation;Notch 1 intracellular domain	19.3107	19.9721	1.58162	19.784	19.1635	17.4798	3.21251	16.3952	20.9268	23.1285		587203	0.027239			0.00847905
3889	NCTQSLQCWK	P46531	NOTCH1	Neurogenic locus notch homolog protein 1;Notch 1 extracellular truncation;Notch 1 intracellular domain	20.0795	20.2222	1.10397	21.0015	18.9947	19.9993	0.498408	19.8191	20.9682	2.21776		522365	0.0242313			0.0486174
556	CLHNGTCVDLVGGFR	Q9UM47	NOTCH3	Neurogenic locus notch homolog protein 3;Notch 3 extracellular truncation;Notch 3 intracellular domain	21.6431	22.6567	2.01894	18.2358	18.6886	17.2462	2.71773	21.5971	22.3413	1.67505		422502	0.0195989			0.00721151
585	DADACNATNWIEYMFNK	O15118	NPC1	Niemann-Pick C1 protein	23.0512	23.9735	1.89513	21.0668	23.0402	21.494	2.92047	20.8049	24.5986	13.8681		8.62564e+06	0.400124			0.137007
5534	VDNITDQFCNASVVDPACVR	O15118	NPC1	Niemann-Pick C1 protein	26.0282	26.8447	1.76113	26.9326	26.9663	26.6996	1.20305	24.4324	26.9247	5.62674		1.31119e+08	6.0823			5.05572
3142	LIASNVTETMGINGSAYR	O15118	NPC1	Niemann-Pick C1 protein	24.6961	26.1104	2.6653	25.5873	25.7764	25.7074	1.04899	24.1796	25.1957	2.02244		5.74738e+07	2.66608			2.54157
4446	QSQFLNVTATEDYVDPVTNQTK	O15118	NPC1	Niemann-Pick C1 protein	23.988	25.3397	2.55213	26.0667	24.9789	25.5669	0.665265	23.8813	25.8877	4.01778		3.30673e+07	1.53391			2.30572
1963	GQSYSVNVTFTSNIQSK	P61916	NPC2	Epididymal secretory protein E1	19.5648	20.2545	1.61295	23.2527	22.7306	22.5719	1.11628	23.341	23.7347	1.31376		6.95973e+06	0.322846			0.289216
882	DSPVLPVTLQCNLTSSSHTLTYSYWTK	Q9Y639	NPTN	Neuroplastin	26.6216	27.4194	1.73845	26.7288	25.9895	16.1451	919.305	26.1383	26.9885	1.80275		6.66222e+07	3.09045			0.00336173
5842	VNLSAAPAPVSAVPTGLHSK	O95502	NPTXR	Neuronal pentraxin receptor	17.1425	17.7543	1.52816	18.8359	18.5294	17.9896	1.45377	21.6281	22.6557	2.03863		378360	0.0175513			0.0120729
3811	MNSTLFSQVENHSVHSNFSEK	P25929	NPY1R	Neuropeptide Y receptor type 1	20.1635	18.1094	0.240799	19.713	16.5439	18.2049	0.31622	21.7444	22.8841	2.20335		95545.5	0.00443214			0.014016
1259	ERPPTFLTPEGNASNKEELR	Q92823	NRCAM	Neuronal cell adhesion molecule	20.2028	20.3397	1.09954	16.5991	18.3676	14.9388	10.7689	16.7487	18.8252	4.21783		338219	0.0156892			0.0014569
6353	YQPINSTHELGPLVDLK	Q92823	NRCAM	Neuronal cell adhesion molecule	26.7675	27.0683	1.23183	19.5847	19.6884	16.4201	9.6351	18.7277	19.7114	1.97753		844888	0.0391924			0.00406767
3529	LSPYVNYSFR	Q92823	NRCAM	Neuronal cell adhesion molecule	20.7446	21.134	1.30985	17.419	18.6864	16.538	4.43336	18.4237	18.3902	0.977047		421859	0.0195691			0.00441405
1258	ERPPTFLTPEGNASNK	Q92823	NRCAM	Neuronal cell adhesion molecule	23.9725	24.466	1.40786	19.6523	17.5061	16.9979	1.42227	17.3494	17.4648	1.08328		186149	0.00863504			0.00607129
685	DGDDEWTSVVVANVSK	Q92823	NRCAM	Neuronal cell adhesion molecule	24.645	25.3388	1.61754	17.9548	17.6908	17.9317	0.846217	17.2948	18.6187	2.50342		211574	0.00981441			0.011598
1980	GSALHEDIYVLHENGTLEIPVAQK	Q92823	NRCAM	Neuronal cell adhesion molecule	24.6579	24.3612	0.814112	17.5865	17.7719	18.2414	0.722215	17.8628	18.3334	1.38569		223808	0.0103819			0.0143751
1074	EGFSANYSVLQSSVSEDFK	O14786	NRP1	Neuropilin-1	20.6396	17.8546	0.145088	24.9177	24.2749	17.0063	154.194	16.935	18.8929	3.88496		2.02989e+07	0.941621			0.00610674
1934	GPECSQNYTTPSGVIK	O14786	NRP1	Neuropilin-1	19.4668	18.0692	0.37956	17.8397	23.038	22.7355	1.23328	18.0369	18.0414	1.00312		8.6125e+06	0.399514			0.323944
4530	RGPECSQNYTTPSGVIK	O14786	NRP1	Neuropilin-1	17.8608	17.4753	0.765514	16.3361	18.9358	23.2797	0.0492443	18.57	17.3264	0.422318		501469	0.023262			0.472379
2942	LDNYSTQELGK	P21589	NT5E	5-nucleotidase	21.3214	21.7058	1.30532	27.4217	27.4286	26.9566	1.38703	21.646	22.7001	2.07642		1.80647e+08	8.37981			6.04155
377	AQAGLEEALLAPGFGNASGNASER	P30989	NTSR1	Neurotensin receptor type 1	20.7078	18.9889	0.30378	18.1897	18.5644	18.4302	1.09748	16.8509	18.4591	3.04871		387651	0.0179823			0.016385
1773	GFLASGSMIGTSTIEVIAQEPFGANQTIIVAVK	Q8TEM1	NUP210	Nuclear pore membrane glycoprotein 210	24.0541	25.0358	1.97479	18.703	17.5648	16.5818	1.97657	25.4588	24.4865	0.509693		193879	0.00899362			0.00455011
4522	RFDNFSSLSIQWESTR	Q8TEM1	NUP210	Nuclear pore membrane glycoprotein 210	18.5174	18.6472	1.09414	19.8286	17.2315	16.332	1.86542	19.6568	19.6231	0.976912		153886	0.00713841			0.0038267
1404	FDNFSSLSIQWESTR	Q8TEM1	NUP210	Nuclear pore membrane glycoprotein 210	19.7147	20.8348	2.17362	16.2679	18.9533	18.2837	1.59063	20.2921	18.0602	0.212878		507589	0.0235459			0.0148028
5829	VNFTLEASEGCYR	Q8TEM1	NUP210	Nuclear pore membrane glycoprotein 210	25.0796	26.1934	2.16415	24.0703	24.228	23.9826	1.18542	25.9615	27.1595	2.29421		1.96496e+07	0.911502			0.768927
2326	IETVLPAEFFEVLSSSQNGSYHR	Q8TEM1	NUP210	Nuclear pore membrane glycoprotein 210	26.1115	26.9257	1.75832	24.8462	24.6841	24.4461	1.17936	27.0244	28.1594	2.19619		2.69559e+07	1.25042			1.06026
1090	EGSGYFFLNTSTADVVK	Q8TEM1	NUP210	Nuclear pore membrane glycoprotein 210	24.6797	25.6134	1.91017	23.4364	23.3357	23.13	1.15325	25.8317	27.0043	2.25418		1.05863e+07	0.491076			0.425821
3414	LPNSTIYVVEPGYLGFTVHPGDR	Q8TEM1	NUP210	Nuclear pore membrane glycoprotein 210	25.0388	25.4842	1.36169	24.0655	23.3772	23.8038	0.744013	25.9795	27.1273	2.21576		1.08953e+07	0.505407			0.679299
1442	FFQNVTAEDTDSIGLALFAPHSSR	Q8TEM1	NUP210	Nuclear pore membrane glycoprotein 210	17.779	16.8914	0.540513	17.5356	17.3751	18.219	0.557135	23.9896	26.1583	4.49618		169991	0.0078855			0.0141536
501	AWSWAWPTNHTGALAR	O95158	NXPH4	Neurexophilin-4	17.6087	17.9487	1.26576	17.2493	17.9797	18.2142	0.84998	21.136	22.0684	1.90845		258481	0.0119904			0.0141066
2194	HNSSSLGNLSVSIVPPSK	O95158	NXPH4	Neurexophilin-4	18.302	17.7548	0.684347	19.6063	19.1784	19.6713	0.710595	23.7275	24.3316	1.52003		593299	0.0275218			0.0387306
5657	VHYAYQTNASTYEYIDIPFQNK	Q99784	OLFM1	Noelin	20.0194	20.0374	1.01255	18.1106	17.9681	17.3489	1.53602	20.7683	22.2484	2.78968		256411	0.0118943			0.00774359
5893	VQNMSQSIEVLDR	Q99784	OLFM1	Noelin	17.2177	20.6194	10.5685	18.1781	17.1063	16.8507	1.19383	20.5768	21.4297	1.80613		141094	0.00654504			0.00548238
2948	LDPVSLQTLQTWNTSYPK	Q99784	OLFM1	Noelin	20.3672	20.8901	1.43684	17.931	17.432	17.9927	0.677973	20.9408	22.1504	2.31274		176830	0.00820272			0.0120989
2735	IYVLDGTQNDTAFVFPR	Q9NRN5	OLFML3	Olfactomedin-like protein 3	17.7178	17.322	0.760068	18.006	17.1495	18.4425	0.408102	24.3194	25.9099	3.01154		145383	0.00674399			0.0165253
3804	MMQYNVSIK	Q99650	OSMR	Oncostatin-M-specific receptor subunit beta	18.7663	16.3115	0.182403	18.5221	18.1735	16.7139	2.75032	18.2588	18.1376	0.919423		295644	0.0137142			0.00498641
6119	WSEWSGQNFTTLEAAPSEAPDVWR	Q99650	OSMR	Oncostatin-M-specific receptor subunit beta	18.0126	17.489	0.695634	22.2619	17.0784	17.2772	0.871275	18.0119	19.4482	2.70626		138392	0.00641968			0.00736815
3619	LVEEGTNVTICYVSR	Q99650	OSMR	Oncostatin-M-specific receptor subunit beta	18.2671	19.2346	1.95545	22.5414	18.8137	19.0375	0.856307	19.7979	21.4884	3.22769		460774	0.0213743			0.024961
101	AEPGTHLCIDVEDAMNITR	Q86WC4	OSTM1	Osteopetrosis-associated transmembrane protein 1	18.1434	24.6366	90.0841	23.4452	23.7467	23.5663	1.1332	24.3479	25.4649	2.16895		1.40757e+07	0.652938			0.576191
1176	ELLLDFANSSAELTGCLVR	Q86WC4	OSTM1	Osteopetrosis-associated transmembrane protein 1	23.5165	25.0886	2.97337	23.8646	22.8469	22.9288	0.944813	24.5836	24.594	1.00723		7.54401e+06	0.349949			0.37039
13	AAENFTLLVK	Q99571	P2RX4	P2X purinoceptor 4	23.4671	24.4011	1.91057	18.0428	21.8879	21.825	1.04456	25.8513	27.0934	2.36543		3.88074e+06	0.180019			0.172339
824	DMSDGFISNLTIQR	P13674	P4HA1	Prolyl 4-hydroxylase subunit alpha-1	27.4237	28.0637	1.55833	27.0142	27.4656	27.2726	1.14314	27.1472	28.5637	2.66937		1.8534e+08	8.5975			7.52097
5277	TLTNQTEAELATPEGIYER	O15460	P4HA2	Prolyl 4-hydroxylase subunit alpha-2	21.3364	22.0438	1.63286	17.8897	20.5787	20.0806	1.41235	21.0764	21.0092	0.954489		1.56605e+06	0.0726455			0.0514358
5278	TLTNQTEAELATPEGIYERPVDYLPER	O15460	P4HA2	Prolyl 4-hydroxylase subunit alpha-2	26.6487	27.2436	1.51037	26.305	26.0411	25.6393	1.32116	26.3141	27.7912	2.78389		6.90482e+07	3.20299			2.42438
3610	LVANESVPFETSCR	Q9NXG6	P4HTM	Transmembrane prolyl 4-hydroxylase	19.1805	24.4768	39.2957	22.5664	22.4772	22.2052	1.20748	22.6029	23.7259	2.17799		5.83864e+06	0.270841			0.224303
4287	PHFGDQEPVQGFVMNFSNGEIIDIFKPVR	P19021	PAM	Peptidyl-glycine alpha-amidating monooxygenase;Peptidylglycine alpha-hydroxylating monooxygenase;Peptidyl-alpha-hydroxyglycine alpha-amidating lyase	18.3536	21.1613	7.00167	19.2919	17.157	18.6527	0.354609	20.0531	19.9291	0.91764		146141	0.00677914			0.0191172
4731	SGILRNDSTVPDQFQCK	Q96RD7	PANX1	Pannexin-1	18.0757	20.4617	5.22706	22.1089	17.4748	21.1933	0.0759661	18.8341	23.5254	25.8358		182154	0.00844971			0.11123
328	ANDSDQGANAEIEYTFHQAPEVVR	Q08174	PCDH1	Protocadherin-1	21.4304	23.4233	3.98036	19.6136	21.6121	21.6909	0.946845	22.9674	23.6525	1.60781		3.20546e+06	0.148694			0.157042
6214	YGTALVHLYVNETLANR	Q08174	PCDH1	Protocadherin-1	21.7605	21.8315	1.05044	16.8092	16.6141	19.6555	0.121464	22.2086	22.9456	1.66671		100310	0.00465313			0.0383088
2296	IDNLTGELSTSER	O60245	PCDH7	Protocadherin-7	18.938	20.0939	2.22823	17.947	17.347	18.1148	0.587312	18.8079	18.804	0.9973		166712	0.0077334			0.0131674
4069	NLSIAESRPLDSR	Q9UN74	PCDHA4	Protocadherin alpha-4	18.9046	17.5835	0.40023	18.5341	18.1028	16.9408	2.23767	18.7623	20.1671	2.64781		281505	0.0130584			0.00583569
4699	SEYNITITVTDFGTPR	Q9Y5E7	PCDHB2	Protocadherin beta-2	18.6764	20.0614	2.61172	18.8659	18.1053	16.5233	2.99385	20.0654	20.1287	1.04485		281993	0.013081			0.0043693
113	AEYNVTITVTDLGTPR	Q9UN66	PCDHB8	Protocadherin beta-8	17.3069	19.0575	3.36498	18.0392	17.5299	16.7164	1.75747	21.2118	22.2591	2.06666		189246	0.00877867			0.00499506
112	AEYNITITVTDLGTPR	Q9Y5E1	PCDHB9;PCDHB10;PCDHB12;PCDHB6	Protocadherin beta-9;Protocadherin beta-10;Protocadherin beta-12;Protocadherin beta-6	17.8554	18.0381	1.13501	19.2929	16.7203	16.4771	1.18362	20.8598	20.0767	0.581117		107972	0.00500858			0.0042316
1289	ETLSLYNITLK	Q9Y5G6	PCDHGA7	Protocadherin gamma-A7	17.5293	18.3928	1.81945	18.5054	16.9476	18.2565	0.403629	21.1116	22.011	1.86529		126397	0.00586326			0.0145264
6377	YTIPEELANGSR	Q9Y5G3	PCDHGB1	Protocadherin gamma-B1	16.7002	19.9678	9.63043	17.1568	18.045	16.7329	2.48303	18.8941	19.3548	1.37621		270450	0.0125455			0.00505252
3673	LVTDGTLDREQTPEYNVTITATDR	Q9Y5G0	PCDHGB5	Protocadherin gamma-B5	17.7236	18.0439	1.24859	17.7753	18.3309	16.6192	3.27547	18.6811	22.2496	11.8638		329724	0.0152951			0.00466961
1252	EQTPEYNVTITATDR	Q9Y5G0	PCDHGB5	Protocadherin gamma-B5	21.2826	22.2871	2.00625	19.3589	16.4729	17.2196	0.595965	21.3041	21.8016	1.41177		90957.2	0.0042193			0.00707977
856	DQGSPALSANVSLR	Q9Y5G0	PCDHGB5;PCDHGB4;PCDHGB7;PCDHGB2;PCDHGB1	Protocadherin gamma-B5;Protocadherin gamma-B4;Protocadherin gamma-B7;Protocadherin gamma-B2;Protocadherin gamma-B1	22.7432	23.7779	2.04869	22.352	22.2178	22.2198	0.998615	23.3215	24.3131	1.98839		4.8778e+06	0.22627			0.226584
1299	ETVPEYNLSITAR	Q9UN70	PCDHGC3	Protocadherin gamma-C3	19.4703	20.844	2.59134	17.2922	18.7445	17.9466	1.73857	20.4117	18.535	0.272306		439194	0.0203732			0.0117184
5355	TSADLDRETVPEYNLSITAR	Q9UN70	PCDHGC3	Protocadherin gamma-C3	18.8366	19.3792	1.4566	17.0221	17.9971	17.3742	1.53997	17.3218	22.5348	37.0911		261618	0.0121358			0.00788058
738	DINVTGVWER	Q16549	PCSK7	Proprotein convertase subtilisin/kexin type 7	18.5241	19.3354	1.75479	17.9406	17.6703	17.7916	0.919359	19.8747	21.3804	2.83962		208588	0.00967594			0.0105247
4805	SLEVLWNVSR	Q16549	PCSK7	Proprotein convertase subtilisin/kexin type 7	18.4582	19.3277	1.82703	17.4236	17.1166	17.42	0.81034	19.771	20.7142	1.92279		142105	0.00659194			0.00813477
1751	GELNTSIFSSR	Q9UHG3	PCYOX1	Prenylcysteine oxidase 1	26.4579	26.8832	1.34285	25.9314	26.0925	25.9878	1.07527	26.1938	26.1569	0.974747		7.15526e+07	3.31916			3.08681
1752	GELNTSIFSSRPIDK	Q9UHG3	PCYOX1	Prenylcysteine oxidase 1	26.3489	24.9939	0.390935	26.8724	26.2408	26.7049	0.724923	26.4102	27.8188	2.65479		7.9299e+07	3.6785			5.07433
3826	MSNITFLNFDPPIEEFHQYYQHIVTTLVK	Q9UHG3	PCYOX1	Prenylcysteine oxidase 1	23.4086	17.7589	0.0199192	24.5389	17.4263	22.2346	0.0356909	25.8117	25.9035	1.0657		176132	0.00817037			0.22892
2433	IITVSTNGSIHSPR	Q9NRA1	PDGFC	Platelet-derived growth factor C;Platelet-derived growth factor C, latent form;Platelet-derived growth factor C, receptor-binding form	17.7436	16.7075	0.487644	21.4591	17.4566	17.3997	1.04023	17.8843	19.7382	3.61476		179871	0.00834379			0.00802111
4954	STGGAPTFNVTVTK	P07737	PFN1	Profilin-1	17.5168	17.6536	1.09946	22.1564	21.7399	21.7764	0.975017	18.0771	18.0151	0.957935		3.50237e+06	0.162467			0.16663
635	DCVLQCEEQNCSGGALNHFR	Q96FM1	PGAP3	Post-GPI attachment to proteins factor 3	21.0601	18.5122	0.171004	21.5538	17.7833	18.9263	0.452817	16.522	22.9133	83.9408		225583	0.0104643			0.0231093
1769	GFGVAIVGNYTAALPTEAALR	Q96PD5	PGLYRP2	N-acetylmuramoyl-L-alanine amidase	17.1499	17.836	1.60893	19.1634	17.6085	17.8002	0.875573	20.3522	21.0941	1.67238		199842	0.00927021			0.0105876
2184	HMLALAPNSTAR	Q92508	PIEZO1	Piezo-type mechanosensitive ion channel component 1	18.614	19.8555	2.36444	15.0969	18.2571	13.8173	21.7027	17.8994	15.3221	0.167554		313281	0.0145324			0.000669614
1208	ELYNGTADITLR	Q92508	PIEZO1	Piezo-type mechanosensitive ion channel component 1	24.133	25.0256	1.85652	22.3067	21.7971	21.8493	0.964464	22.7213	22.9319	1.15717		3.64402e+06	0.169038			0.175266
5469	TYNASVLPVR	Q96S52	PIGS	GPI transamidase component PIG-S	23.8208	24.0074	1.13808	24.5065	24.0547	24.0588	0.997162	24.6189	25.9265	2.47529		1.74255e+07	0.808331			0.810631
4291	PLGLANDTDHYFLR	Q969N2	PIGT	GPI transamidase component PIG-T	24.1665	24.519	1.27677	24.1907	24.0942	23.615	1.39397	24.8569	25.0065	1.10926		1.79092e+07	0.830768			0.595973
5460	TYAIYDLLDTAMINNSR	Q969N2	PIGT	GPI transamidase component PIG-T	21.5518	24.2867	6.65713	23.4764	23.1558	23.0211	1.09786	24.4025	25.3466	1.92399		9.34524e+06	0.433504			0.394861
4628	SAVSTSWLLPYNYTWSPEK	Q8NCC3	PLA2G15	Group XV phospholipase A2	22.4457	23.1885	1.67342	18.8711	21.7489	17.2423	22.7312	23.3801	24.8414	2.75356		3.52429e+06	0.163484			0.00719205
5618	VFVQTPTINYTLR	Q8NCC3	PLA2G15	Group XV phospholipase A2	23.7812	24.0985	1.246	23.3185	23.2989	22.9098	1.30958	25.282	26.045	1.69702		1.03197e+07	0.478708			0.365544
4341	QEHQVLLQELPGSEHIEMLANATTLAYLK	Q8NCC3	PLA2G15	Group XV phospholipase A2	18.9447	17.4145	0.346229	21.2235	20.5012	20.6944	0.874664	22.8967	19.1611	0.075071		1.48414e+06	0.0688461			0.0787115
1230	ENSTDYLYPEQLK	P00749	PLAU	Urokinase-type plasminogen activator;Urokinase-type plasminogen activator long chain A;Urokinase-type plasminogen activator short chain A;Urokinase-type plasminogen activator chain B	17.1331	17.803	1.59096	25.208	25.3094	25.1312	1.13147	19.4201	20.4558	2.05011		4.15804e+07	1.92882			1.7047
1923	GNSTHGCSSEETFLIDCR	Q03405	PLAUR	Urokinase plasminogen activator surface receptor	17.1246	17.4888	1.28717	24.9331	24.8581	24.4343	1.34146	17.8769	18.4615	1.49962		3.04112e+07	1.41071			1.05162
2728	IYNWSGYPLLVQK	Q6P4A8	PLBD1	Phospholipase B-like 1;Phospholipase B-like 1 chain A;Phospholipase B-like 1 chain B;Phospholipase B-like 1 chain C	20.8752	21.0369	1.1186	21.2636	21.2093	21.387	0.884111	22.1435	23.2143	2.1006		2.42457e+06	0.11247			0.127213
4145	NQSLVQDMDSMVR	Q8NHP8	PLBD2	Putative phospholipase B-like 2;Putative phospholipase B-like 2 32 kDa form;Putative phospholipase B-like 2 45 kDa form	20.8774	21.249	1.29379	19.6661	21.6906	19.5969	4.26841	22.7513	23.6024	1.80388		3.38471e+06	0.157009			0.0367839
2195	HPDAVAWANLTNAIR	Q8NHP8	PLBD2	Putative phospholipase B-like 2;Putative phospholipase B-like 2 32 kDa form;Putative phospholipase B-like 2 45 kDa form	24.2269	24.8578	1.54853	24.2693	23.6159	23.8415	0.855239	24.8463	25.9292	2.11829		1.28557e+07	0.596344			0.697284
1165	ELGVVMYNCSCLAR	Q8IV08	PLD3	Phospholipase D3	23.6673	20.7719	0.1344	23.8078	23.6407	23.6916	0.965334	19.5221	24.2798	27.0527		1.30786e+07	0.606684			0.628471
1519	FLGSGGFIGYAPNLSK	Q02809	PLOD1	Procollagen-lysine,2-oxoglutarate 5-dioxygenase 1	19.109	17.9146	0.436968	21.3891	18.9956	17.7828	2.31787	18.3341	17.952	0.76732		522691	0.0242465			0.0104607
4521	REQINITLDHR	Q02809	PLOD1	Procollagen-lysine,2-oxoglutarate 5-dioxygenase 1	16.5415	18.8087	4.81388	18.6086	23.9771	23.866	1.08005	23.8253	23.8614	1.02534		1.6513e+07	0.766001			0.709226
1245	EQINITLDHR	Q02809	PLOD1	Procollagen-lysine,2-oxoglutarate 5-dioxygenase 1	20.7754	21.0681	1.22493	24.1001	24.0519	24.1478	0.935688	20.803	23.0574	4.77136		1.73918e+07	0.806764			0.862214
4518	REAINITLDHK	O00469	PLOD2	Procollagen-lysine,2-oxoglutarate 5-dioxygenase 2	17.2012	16.7854	0.749604	23.1176	23.5554	23.0638	1.406	22.3248	24.6124	4.88243		1.23277e+07	0.571854			0.406723
995	EAINITLDHK	O00469	PLOD2	Procollagen-lysine,2-oxoglutarate 5-dioxygenase 2	22.5795	22.9971	1.3357	22.432	22.3489	22.0635	1.21875	22.4211	23.0314	1.52658		5.34182e+06	0.247795			0.203319
6191	YFNYTVK	O00469	PLOD2	Procollagen-lysine,2-oxoglutarate 5-dioxygenase 2	23.2309	23.5366	1.23602	23.8514	23.6414	23.4663	1.12904	23.3785	24.7774	2.637		1.30849e+07	0.606979			0.537605
4611	SAEFFNYTVR	O60568	PLOD3	Procollagen-lysine,2-oxoglutarate 5-dioxygenase 3	24.799	25.0765	1.21209	26.1307	26.1463	25.8808	1.20205	23.6486	24.4536	1.74715		7.42712e+07	3.44527			2.86616
4716	SFTDLLLDDGQDNNTQIEEDTDHNYYISR	Q6UX71	PLXDC2	Plexin domain-containing protein 2	22.0314	25.8644	14.2511	19.246	17.9103	18.3578	0.733312	20.778	18.6762	0.232967		246341	0.0114272			0.015583
2657	ITNISAVEMTPLPTCLQFNR	Q6UX71	PLXDC2	Plexin domain-containing protein 2	23.4048	23.8877	1.39755	18.4227	17.5486	18.814	0.415984	18.9431	18.8616	0.945075		191715	0.0088932			0.0213787
6328	YNYTEDPTILR	Q9UIW2	PLXNA1	Plexin-A1	22.5869	23.359	1.70775	24.3219	24.3947	24.1761	1.1636	22.5615	23.8581	2.45649		2.20565e+07	1.02315			0.879294
3506	LSGNLTLLR	Q9UIW2	PLXNA1	Plexin-A1	22.1502	22.655	1.41893	24.4762	24.221	24.0104	1.15717	22.5269	23.4491	1.895		1.95545e+07	0.90709			0.783887
5858	VNVSEDCPQILPSTQIYVPVGVVKPITLAAR	Q9UIW2	PLXNA1	Plexin-A1	18.3062	21.9055	12.1199	22.9683	17.0149	17.4504	0.739437	21.839	18.9826	0.138082		132433	0.00614325			0.00830801
3556	LTGNLTIQVAHK	O75051	PLXNA2	Plexin-A2	16.5978	16.5998	1.00139	20.057	19.2887	19.3037	0.989657	17.3347	18.1816	1.79863		640438	0.0297085			0.030019
338	ANISSPGLIYTYTQDPTVTR	P51805	PLXNA3	Plexin-A3	21.9154	23.1429	2.34161	20.0599	20.0729	20.0114	1.04355	20.2431	22.8306	6.01056		1.10292e+06	0.051162			0.0490269
2886	LAPNLTELR	P51805	PLXNA3	Plexin-A3	21.7244	21.9101	1.13737	20.9903	18.0326	20.6513	0.162814	20.6295	21.6563	2.0375		268135	0.0124382			0.0763948
6378	YTLDPNITSAGPTK	O43157	PLXNB1	Plexin-B1	22.0932	22.5265	1.35032	17.4962	18.9319	17.2736	3.15644	22.4477	23.4307	1.97657		500115	0.0231992			0.00734979
299	ALSNISLR	O15031	PLXNB2	Plexin-B2	22.8074	23.3207	1.42731	23.7357	23.6049	17.5422	66.8428	24.4404	25.5482	2.15517		1.2758e+07	0.591815			0.00885383
3509	LSHDANETLPLHLYVK	O15031	PLXNB2	Plexin-B2	17.1409	24.6039	176.436	25.4945	24.9477	22.7259	4.66475	25.9545	27.0649	2.15906		3.23598e+07	1.5011			0.321796
579	CVYEALCNTTSECPPPVITR	O15031	PLXNB2	Plexin-B2	21.0467	22.9908	3.84798	22.8844	22.9872	21.5522	2.70382	24.0293	25.1641	2.19588		8.31451e+06	0.385691			0.142647
4767	SINVTGQGFSLIQR	O15031	PLXNB2	Plexin-B2	23.2106	23.8011	1.50577	25.0583	25.1172	24.6991	1.33617	25.3064	26.4646	2.23179		3.63941e+07	1.68824			1.26349
988	EAESLQPMTVVGTDYVFHNDTK	O15031	PLXNB2	Plexin-B2	22.8356	24.6518	3.52152	24.7707	24.0095	23.7324	1.21176	25.828	27.5868	3.38417		1.68881e+07	0.783398			0.646498
5091	TEAGAFEYVPDPTFENFTGGVK	O15031	PLXNB2	Plexin-B2	17.6011	24.8468	151.765	26.068	25.7318	25.6085	1.08922	26.4961	27.5691	2.1038		5.57242e+07	2.58492			2.37317
1799	GGLNLTAVTVAAENNHTVAFLGTSDGR	O15031	PLXNB2	Plexin-B2	24.2102	24.7035	1.40766	24.9442	24.569	24.4783	1.06489	25.6746	26.838	2.23985		2.48889e+07	1.15454			1.08419
4635	SCVAVTSAQPQNMSR	O15031	PLXNB2	Plexin-B2	18.7648	19.0343	1.20539	18.8199	18.6747	18.8368	0.893723	22.4739	20.8283	0.319613		418451	0.019411			0.0217192
3133	LHVTLYNCSFGR	O15031	PLXNB2	Plexin-B2	21.3736	21.9641	1.50577	23.9272	23.1531	23.7747	0.64995	24.088	25.4738	2.61317		9.32776e+06	0.432694			0.665734
5995	VVFLSPAVPEEPEAYNLTVLIEMDGHR	O15031	PLXNB2	Plexin-B2	22.266	23.603	2.52625	17.3646	16.8536	17.7822	0.525368	24.8893	25.5165	1.54456		118424	0.00549341			0.0104563
1608	FSAPNTTLNHLALAPGR	Q9ULL4	PLXNB3	Plexin-B3	16.858	17.1811	1.25102	17.8727	16.3802	16.5373	0.896826	17.4926	22.6673	36.1193		85296.6	0.00395671			0.00441191
5774	VLNSTLITCPSPGALSNASAPVDFFINGR	Q9Y4D7	PLXND1	Plexin-D1	25.0497	25.9923	1.92199	18.9643	18.656	18.1318	1.43814	22.5827	25.4261	7.17709		413062	0.019161			0.0133235
3716	LYQLSGANLSLEAEAAVGPVPDSPLCHAPQLPQASCEHPR	Q9Y4D7	PLXND1	Plexin-D1	16.2979	22.7756	89.1214	17.4706	18.7498	18.254	1.4101	18.6221	19.3009	1.60081		440811	0.0204482			0.0145012
333	ANFTIYDCSR	Q9Y4D7	PLXND1	Plexin-D1	22.1871	22.5847	1.31731	17.6711	19.2143	19.8265	0.654198	20.6375	22.4383	3.48413		608248	0.0282152			0.0431295
6383	YTVSEEIVCVTGPAPGPLSGVVTVNASK	Q9Y4D7	PLXND1	Plexin-D1	17.5411	24.8688	160.641	20.1873	19.5136	20.1312	0.651754	18.4445	23.232	27.6173		748478	0.0347202			0.0532719
1466	FHMVQNVSMAVHHIGR	Q9Y4D7	PLXND1	Plexin-D1	16.4245	20.1215	12.969	18.8486	17.1425	17.779	0.643272	17.9621	18.8	1.78745		144679	0.00671135			0.0104331
4412	QLVLNLTGNTLCAGGASDEK	O00592	PODXL	Podocalyxin	22.197	23.6266	2.69372	27.5749	27.1928	27.0624	1.0946	22.5294	23.7645	2.35398		1.53408e+08	7.11625			6.50125
445	ATTLGVSSDSPGTTTLAQQVSGPVNTTVAR	O00592	PODXL	Podocalyxin	18.3549	20.2618	3.75002	22.6966	16.8866	17.2647	0.76945	17.8251	19.9637	4.40335		121164	0.00562051			0.00730458
4801	SLEEIGIQNYSTTSSCQAR	Q9NZ53	PODXL2	Podocalyxin-like protein 2	21.6026	23.6852	4.2357	18.5461	16.8268	19.018	0.218969	18.1292	20.5824	5.47629		116244	0.00539231			0.0246259
1886	GLNVSCLSVQGSASIVAPLLLR	Q9Y2G5	POFUT2	GDP-fucose protein O-fucosyltransferase 2	17.7601	18.1954	1.35219	17.0346	19.7051	20.602	0.537039	21.1671	18.9906	0.221212		854725	0.0396487			0.0738283
1541	FLSYNVTR	Q8NBL1	POGLUT1	Protein O-glucosyltransferase 1	21.231	21.9397	1.63433	22.0266	22.0646	21.5497	1.4289	22.312	23.8731	2.95079		4.38638e+06	0.203474			0.1424
3671	LVSNASMLVSMHGAQLVTTLFLPR	Q8NAT1	POMGNT2	Protein O-linked-mannose beta-1,4-N-acetylglucosaminyltransferase 2	17.6502	19.0161	2.57737	19.0296	18.6413	18.9401	0.812928	21.373	18.3755	0.125217		408875	0.0189668			0.0233314
3395	LNVSHTGVPLGEEYILVFSR	Q8NAT1	POMGNT2	Protein O-linked-mannose beta-1,4-N-acetylglucosaminyltransferase 2	17.6435	21.2163	11.8993	17.4581	16.346	17.706	0.389582	23.1125	23.6382	1.43963		83298.3	0.00386402			0.00991836
1661	FVHVNTSAVLK	Q9Y6A1	POMT1	Protein O-mannosyl-transferase 1	19.6885	20.215	1.44043	21.5794	21.2079	17.7348	11.1047	22.1688	23.1125	1.92345		2.42222e+06	0.112361			0.0101184
1615	FSGVNDTDFR	Q9UKY4	POMT2	Protein O-mannosyl-transferase 2	21.639	22.3535	1.64091	20.7204	20.6706	20.4024	1.2043	21.2946	22.3453	2.07153		1.66905e+06	0.0774236			0.0642891
2238	HYQVTGYGINGTGDSNDFWR	Q9UKY4	POMT2	Protein O-mannosyl-transferase 2	17.4957	16.3371	0.447947	21.1781	17.7268	20.8567	0.114237	21.8884	22.5407	1.57167		216919	0.0100624			0.0880836
2540	INCSDGYIEYYICR	O14494	PPAP2A	Lipid phosphate phosphohydrolase 1	18.0807	22.3805	19.6956	21.839	21.4838	21.3081	1.12951	19.5626	21.392	3.55389		2.9327e+06	0.136041			0.120443
5825	VNCSVYVQLEK	O43688	PPAP2C	Lipid phosphate phosphohydrolase 2	25.1617	25.4542	1.22476	24.3322	23.5896	23.613	0.983911	25.23	26.1626	1.90871		1.26234e+07	0.585572			0.595147
898	DTNGSQFFITTVK	P23284	PPIB	Peptidyl-prolyl cis-trans isomerase B	22.6361	22.8396	1.15149	22.9259	23.0647	22.6233	1.35792	22.4705	23.2475	1.71356		8.77337e+06	0.406977			0.299706
4295	PLTNCSIINSGK	P45877	PPIC	Peptidyl-prolyl cis-trans isomerase C	20.1858	20.6176	1.34892	18.9288	17.1098	16.7014	1.32721	20.0997	18.9672	0.456125		141437	0.00656094			0.00494339
5664	VIDGMTVVHSIELQATDGHDRPLTNCSIINSGK	P45877	PPIC	Peptidyl-prolyl cis-trans isomerase C	25.2783	26.5787	2.46297	22.3921	19.4998	19.9044	0.755446	25.6704	27.8743	4.60723		741352	0.0343896			0.0455223
1529	FLNDSIVDPVDSEWFGFYR	P50897	PPT1	Palmitoyl-protein thioesterase 1	21.8829	18.4286	0.091233	19.1605	24.0764	17.8532	74.7085	26.0157	26.9125	1.86193		1.76896e+07	0.820581			0.0109838
3968	NHSIFLADINQER	P50897	PPT1	Palmitoyl-protein thioesterase 1	24.4235	24.8633	1.35642	25.3519	25.0741	24.9272	1.10719	26.9727	28.1241	2.22129		3.53229e+07	1.63855			1.47992
1026	EDVYRNHSIFLADINQER	P50897	PPT1	Palmitoyl-protein thioesterase 1	17.4505	17.1292	0.800348	20.7848	18.9624	20.1104	0.45125	18.7678	25.6362	116.841		510800	0.0236949			0.0525093
4262	NYSVLYFQQK	P42785	PRCP	Lysosomal Pro-X carboxypeptidase	21.4887	22.0469	1.47243	23.1459	22.9379	22.6673	1.20631	24.3316	25.1836	1.805		8.03519e+06	0.372734			0.308987
4003	NISSHTNIVFSNGELDPWSGGGVTK	P42785	PRCP	Lysosomal Pro-X carboxypeptidase	17.5066	19.661	4.45183	23.0202	20.3386	22.5874	0.210399	25.5554	25.8526	1.22876		1.32595e+06	0.061508			0.29234
698	DGSDEPGTAACPNGSFHCTNTGYKPLYIPSNR	P14314	PRKCSH	Glucosidase 2 subunit beta	17.7722	18.6692	1.86219	18.5965	24.1909	24.6532	0.725828	24.7139	26.5026	3.45503		1.91508e+07	0.888361			1.22393
234	ALANFTATSSK	P16471	PRLR	Prolactin receptor	18.354	17.8712	0.715587	17.3243	17.4962	17.024	1.38722	19.5587	20.7146	2.22823		184876	0.00857598			0.00618212
4284	PGTDGGLPTNYSLTYHR	P16471	PRLR	Prolactin receptor	20.483	21.15	1.58777	17.2997	17.5186	17.2062	1.24177	24.1534	24.0728	0.945664		187769	0.00871018			0.00701431
1282	ETFTCWWRPGTDGGLPTNYSLTYHR	P16471	PRLR	Prolactin receptor	18.9761	17.8945	0.472505	16.2197	16.9409	17.4976	0.679855	23.0513	24.7124	3.16258		125811	0.00583609			0.00858431
4000	NISIHQAYQQCK	Q8N271	PROM2	Prominin-2	18.7051	19.2208	1.42969	18.0479	16.4663	17.2655	0.574668	18.5536	19.3242	1.70598		90542	0.00420004			0.00730864
4227	NVSECFLAR	Q8N271	PROM2	Prominin-2	20.2197	20.5982	1.29999	19.6531	17.51	19.1552	0.319702	21.2693	21.9613	1.61552		186653	0.00865841			0.0270827
4499	QYLSYETLYANGSR	O95084	PRSS23	Serine protease 23	21.9448	22.5578	1.52944	23.0667	22.5152	22.566	0.965401	18.524	18.6919	1.12342		5.99447e+06	0.27807			0.288035
827	DNATEEEILVYLEK	P07602	PSAP	Prosaposin;Saposin-A;Saposin-B-Val;Saposin-B;Saposin-C;Saposin-D	26.6017	28.0278	2.68719	26.5933	26.5898	25.7997	1.72919	26.6158	26.447	0.889582		1.01001e+08	4.68522			2.70948
945	DVVTAAGDMLKDNATEEEILVYLEK	P07602	PSAP	Prosaposin;Saposin-A;Saposin-B-Val;Saposin-B;Saposin-C;Saposin-D	28.2109	29.4668	2.38816	27.3266	28.1279	27.746	1.30306	27.6049	29.8282	4.6696		2.9332e+08	13.6064			10.4419
5313	TNSTFVQALVEHVK	P07602	PSAP	Prosaposin;Saposin-A;Saposin-B-Val;Saposin-B;Saposin-C;Saposin-D	24.6829	25.1984	1.42949	28.6789	28.0124	27.7496	1.19981	27.248	28.3522	2.1498		2.70753e+08	12.5596			10.468
5063	TCDWLPKPNMSASCK	P07602	PSAP	Prosaposin;Saposin-A;Saposin-B-Val;Saposin-B;Saposin-C;Saposin-D	25.6888	26.8551	2.24435	25.7037	25.5096	25.3932	1.08403	25.4945	26.6982	2.3033		4.77699e+07	2.21594			2.04417
5314	TNSTFVQALVEHVKEECDR	P07602	PSAP	Prosaposin;Saposin-A;Saposin-B-Val;Saposin-B;Saposin-C;Saposin-D	19.4615	17.4883	0.254687	17.6745	18.561	19.4907	0.524967	18.2734	21.581	9.90118		386739	0.0179399			0.0341734
928	DVLNFTCEPK	P11464	PSG1;PSG8	Pregnancy-specific beta-1-glycoprotein 1;Pregnancy-specific beta-1-glycoprotein 8	16.2677	18.6253	5.12517	17.813	19.238	18.679	1.47325	17.5944	18.2146	1.53709		618323	0.0286826			0.0194689
3358	LNHSYTGMWAPER	P43115	PTGER3	Prostaglandin E2 receptor EP3 subtype	18.5451	17.801	0.59704	17.5273	17.5292	17.8052	0.825878	21.5471	22.8605	2.48527		189154	0.00877441			0.0106243
2987	LENWTDASR	Q9P2B2	PTGFRN	Prostaglandin F2 receptor negative regulator	23.9416	24.284	1.26786	19.6019	19.6462	19.3466	1.2308	24.388	25.5844	2.29167		820532	0.0380626			0.030925
1147	ELDLTCNITTDR	Q9P2B2	PTGFRN	Prostaglandin F2 receptor negative regulator	25.3512	26.3761	2.03482	20.8833	20.8938	20.7599	1.09726	25.5268	26.6713	2.2107		1.94832e+06	0.0903782			0.0823674
6371	YSVLIMAEKPVGDLSSPNETK	Q9P2B2	PTGFRN	Prostaglandin F2 receptor negative regulator	25.8957	26.7362	1.79067	20.9843	17.3797	20.1202	0.149633	26.5682	27.5621	1.99156		170534	0.00791068			0.0528672
5146	TGFYGENCSTPEFLTR	P35354	PTGS2	Prostaglandin G/H synthase 2	17.3315	17.8507	1.43316	19.9683	20.8359	20.4961	1.26558	17.2034	17.5887	1.30613		1.87168e+06	0.0868228			0.0686031
447	ATVFANGSLLLTQVR	Q13308	PTK7	Inactive tyrosine-protein kinase 7	17.0257	18.4518	2.68719	21.2659	21.443	21.162	1.21504	22.7237	21.8633	0.5508		2.85093e+06	0.132248			0.108843
448	ATVFANGSLLLTQVRPR	Q13308	PTK7	Inactive tyrosine-protein kinase 7	17.7496	21.8103	16.6875	24.1715	23.6315	23.3768	1.19309	23.9755	25.3324	2.56134		1.29954e+07	0.602828			0.505267
4338	QDVNITVATVPSWLK	Q13308	PTK7	Inactive tyrosine-protein kinase 7	21.2586	21.1333	0.916813	21.0105	20.6175	20.4827	1.09794	24.0727	23.6229	0.732144		1.60874e+06	0.0746258			0.0679689
3765	MHIFQNGSLVIHDVAPEDSGR	Q13308	PTK7	Inactive tyrosine-protein kinase 7	20.8121	19.5568	0.418906	23.4837	24.1694	24.1303	1.02747	24.729	25.814	2.12138		1.88675e+07	0.87522			0.851818
637	DDAGNYTCIASNGPQGQIR	Q13308	PTK7	Inactive tyrosine-protein kinase 7	21.0158	20.6923	0.799129	22.7914	22.0791	22.6786	0.659983	23.7098	24.7677	2.0819		4.43069e+06	0.20553			0.311417
4584	RQDVNITVATVPSWLK	Q13308	PTK7	Inactive tyrosine-protein kinase 7	17.9805	17.3647	0.652568	21.6016	18.9394	21.282	0.197155	23.1632	25.3109	4.43121		502722	0.0233201			0.118283
5573	VEVEPLNSTAVHVYWK	P10586	PTPRF	Receptor-type tyrosine-protein phosphatase F	26.2054	26.4945	1.22188	24.3539	23.9413	24.3541	0.751164	26.3583	26.8829	1.43853		1.61083e+07	0.747227			0.994758
4644	SDFSQTMLFQANTTR	P23470	PTPRG	Receptor-type tyrosine-protein phosphatase gamma	21.8399	20.7428	0.467455	20.7554	18.0986	17.7535	1.27024	18.8893	17.922	0.511462		280686	0.0130204			0.0102504
5624	VGEEYQELQLDGFDNESSNK	P23470	PTPRG	Receptor-type tyrosine-protein phosphatase gamma	18.9102	24.1569	37.9677	18.2524	21.8987	22.2163	0.802404	18.6181	16.8012	0.28383		3.9099e+06	0.181371			0.226035
6309	YNATVYSQAANGTEGQPQAIEFR	Q12913	PTPRJ	Receptor-type tyrosine-protein phosphatase eta	23.2245	24.3756	2.22083	25.2543	25.3049	24.7919	1.42701	23.4767	24.681	2.30425		4.14509e+07	1.92281			1.34744
3475	LQVNISGLK	Q12913	PTPRJ	Receptor-type tyrosine-protein phosphatase eta	20.0767	21.318	2.36411	22.181	22.6495	22.2784	1.29334	20.3355	20.7074	1.29406		6.57929e+06	0.305198			0.235977
6170	YEIDVGNESTTLGYYNGK	Q12913	PTPRJ	Receptor-type tyrosine-protein phosphatase eta	18.1234	22.2971	18.0472	23.3076	23.269	23.0808	1.13934	21.069	21.8435	1.7106		1.0108e+07	0.468889			0.411544
52	ACVAGFTNITFHPQNK	Q12913	PTPRJ	Receptor-type tyrosine-protein phosphatase eta	17.8668	22.8803	32.3008	18.5347	24.0517	23.8975	1.1128	21.8373	22.8026	1.95247		1.73893e+07	0.806652			0.724882
5555	VEITTNQSIIIGGLFPGTK	Q12913	PTPRJ	Receptor-type tyrosine-protein phosphatase eta	22.4848	17.3379	0.0282247	24.1328	20.485	23.1524	0.15741	17.618	22.4289	28.0689		1.46757e+06	0.0680773			0.432484
2271	IAVDWESLGYNITR	Q15262	PTPRK	Receptor-type tyrosine-protein phosphatase kappa	24.9418	25.7963	1.80813	23.0116	22.6673	22.1928	1.38944	22.7243	23.3097	1.50045		6.66097e+06	0.308987			0.222383
1217	ENDTHCIDFSYLLYSQK	Q15262	PTPRK	Receptor-type tyrosine-protein phosphatase kappa	23.6635	25.0653	2.64231	18.0585	17.8161	21.0461	0.106579	20.9831	21.5601	1.49174		230771	0.0107049			0.100441
6087	WEPFGYNVTR	P28827	PTPRM	Receptor-type tyrosine-protein phosphatase mu	18.3064	17.4059	0.535701	22.7656	22.9892	22.7603	1.17194	16.9909	18.4023	2.65995		8.32605e+06	0.386226			0.329561
490	AVSSFDPEIDLSNQSGR	P28827	PTPRM	Receptor-type tyrosine-protein phosphatase mu	18.0856	16.6254	0.363443	22.0631	22.0231	22.0732	0.965869	18.3712	20.1207	3.36242		4.262e+06	0.197705			0.204691
5541	VEAEALNATAIR	Q13332	PTPRS	Receptor-type tyrosine-protein phosphatase S	21.7913	22.4847	1.61709	21.0784	21.0859	20.5981	1.4023	21.4234	22.5071	2.11946		2.22581e+06	0.10325			0.073629
1815	GHPQILEAAGNASAGTVLLR	Q13332	PTPRS	Receptor-type tyrosine-protein phosphatase S	23.3853	24.5368	2.22145	17.2273	17.9621	21.5089	0.0855671	23.0975	23.2057	1.07788		255347	0.011845			0.138429
4226	NVSCLWCNTNK	P53801	PTTG1IP	Pituitary tumor-transforming gene 1 protein-interacting protein	23.9968	25.1628	2.24389	26.8788	26.6473	26.7358	0.9405	24.0365	25.7237	3.22031		1.05108e+08	4.87573			5.18419
4309	PVDKPINTTLICNVTNALGAR	P15151	PVR	Poliovirus receptor	26.0038	26.2338	1.17283	27.1454	27.1836	27.5327	0.785074	26.3323	26.7699	1.35435		1.52433e+08	7.07102			9.00682
5542	VEDEGNYTCLFVTFPQGSR	P15151	PVR	Poliovirus receptor	23.357	24.0664	1.63512	25.1807	24.8194	25.3897	0.673477	23.6923	24.6734	1.97397		2.96063e+07	1.37337			2.03922
1273	ESQLNLTVMAK	Q15223	PVRL1	Nectin-1	23.8067	24.1223	1.24453	19.0472	17.2892	19.5355	0.210764	24.0017	24.9522	1.93254		160165	0.00742969			0.0352512
1933	GPDSLIDGGNETVAAICIAATGK	Q9NQS3	PVRL3	Nectin-3	19.3988	18.2422	0.448568	22.0223	16.503	17.7139	0.431999	18.4824	18.5117	1.02052		92874.8	0.00430825			0.00997282
4257	NYSLNDATITLHNIGFSDSGK	Q9NQS3	PVRL3	Nectin-3	16.9432	17.3339	1.31103	21.8824	16.3022	21.3941	0.0293214	19.1959	19.8819	1.60882		80807.4	0.00374847			0.127841
559	CLSEGQPPPSYNWTR	Q96NY8	PVRL4	Nectin-4;Processed poliovirus receptor-related protein 4	21.5476	17.5077	0.0607951	17.5794	17.777	18.4167	0.641846	22.1204	23.2946	2.25668		224600	0.0104187			0.0162324
6060	VYCNLSAAHTFEDLK	Q92626	PXDN	Peroxidasin homolog	24.1313	25.1124	1.97397	24.3033	17.7735	24.416	0.0100094	17.997	18.5552	1.47243		224056	0.0103934			1.03837
4899	SPTNTTPHVPAEGPEASRPPK	O00391	QSOX1	Sulfhydryl oxidase 1	17.5684	17.6285	1.04254	17.3803	19.823	18.8717	1.93361	18.1173	14.9064	0.108		927508	0.043025			0.0222511
3947	NGSGAVFPVAGADVQTLR	O00391	QSOX1	Sulfhydryl oxidase 1	19.528	20.0595	1.44543	21.8889	21.7509	21.3509	1.31951	20.2986	20.8323	1.44764		3.52918e+06	0.16371			0.124069
4461	QTMIDFLQNHTEGSRPPACPR	Q6ZRP7	QSOX2	Sulfhydryl oxidase 2	22.7089	23.9894	2.42923	23.756	23.5492	23.574	0.982957	23.6772	24.7057	2.0399		1.22748e+07	0.569401			0.579274
3110	LGVSSVPSCYLIYPNGSHGLINVVKPLR	Q6ZRP7	QSOX2	Sulfhydryl oxidase 2	23.4381	23.6941	1.19416	24.8922	24.284	24.7693	0.714349	24.5097	25.1078	1.51372		2.04274e+07	0.947579			1.32649
1988	GSHYVAIVFESNSSYLGR	Q6ZRP7	QSOX2	Sulfhydryl oxidase 2	21.1406	20.4503	0.619725	21.8505	17.046	21.6479	0.0411804	21.3153	24.7209	10.5971		135319	0.00627712			0.15243
4351	QFFSNCTVDR	O60896	RAMP3	Receptor activity-modifying protein 3	23.8657	24.3798	1.4281	18.1519	18.2803	17.1238	2.22916	18.2773	19.1496	1.83058		318360	0.014768			0.00662492
6029	VVRPDSELGERPPEDNQSFQYDHEAFLGK	Q15293	RCN1	Reticulocalbin-1	21.376	16.568	0.0356983	29.0744	29.1763	27.0928	4.23834	28.2191	29.1339	1.88531		6.06655e+08	28.1413			6.6397
3871	NATYGHYAPGEEFHDVEDAETYK	Q96D15	RCN3	Reticulocalbin-3	17.7288	18.5275	1.73953	22.3649	18.3247	17.8596	1.38041	17.9638	19.1061	2.20733		328310	0.0152296			0.0110326
3293	LLPVQFLCPNISVAYR	P07949	RET	Proto-oncogene tyrosine-protein kinase receptor Ret;Soluble RET kinase fragment;Extracellular cell-membrane anchored RET cadherin 120 kDa fragment	20.8743	21.6368	1.69643	18.4276	18.8335	16.7883	4.1273	19.6125	20.6356	2.03228		467141	0.0216696			0.00525031
6064	VYFSFFNTSFPACSSLKPR	P07949	RET	Proto-oncogene tyrosine-protein kinase receptor Ret;Soluble RET kinase fragment;Extracellular cell-membrane anchored RET cadherin 120 kDa fragment	19.9433	20.3385	1.31513	17.884	18.0638	18.9225	0.551449	17.2015	19.9815	6.86852		273997	0.0127101			0.0230485
5553	VEHWPNETSVQANGSFVR	P07949	RET	Proto-oncogene tyrosine-protein kinase receptor Ret;Soluble RET kinase fragment;Extracellular cell-membrane anchored RET cadherin 120 kDa fragment	21.8455	22.4019	1.4706	17.7644	17.2037	18.7702	0.337626	17.7488	16.4177	0.397465		150949	0.00700217			0.0207394
838	DNSSGTFIVLIR	O43567	RNF13	E3 ubiquitin-protein ligase RNF13	23.5327	24.2112	1.60047	24.3342	23.8257	22.8593	1.95396	23.1062	24.1279	2.03031		1.48679e+07	0.689689			0.35297
3862	NASAVVLYNEER	Q8NC42	RNF149	E3 ubiquitin-protein ligase RNF149	21.6194	22.2438	1.54157	23.2536	22.9466	22.9905	0.970029	20.4199	21.6343	2.32044		8.08379e+06	0.374988			0.386574
4556	RNASAVVLYNEER	Q8NC42	RNF149	E3 ubiquitin-protein ligase RNF149	19.9973	20.2421	1.18493	21.1679	21.227	21.2804	0.963663	18.4584	20.2749	3.52226		2.4545e+06	0.113859			0.118152
6040	VWCLGNETR	Q9Y6N7	ROBO1	Roundabout homolog 1	20.0251	20.4965	1.38645	17.5579	18.5442	16.4993	4.12645	20.3562	22.0555	3.24743		382261	0.0177322			0.00429722
2708	IWCLGNETR	Q9HCK4	ROBO2	Roundabout homolog 2	16.0037	16.8254	1.76749	17.4109	16.8932	17.7725	0.543631	19.851	21.1741	2.50203		121719	0.00564629			0.0103862
3865	NASLEVALLR	Q9HCK4	ROBO2	Roundabout homolog 2	15.502	17.4581	3.88012	18.6373	16.9858	18.4271	0.368235	19.3541	20.5469	2.28596		129788	0.00602058			0.0163498
4237	NVTLPAVFK	P36578	RPL4	60S ribosomal protein L4	16.0496	15.8884	0.894281	19.0035	17.8628	17.1997	1.58348	17.1794	20.1353	7.75916		238363	0.0110571			0.00698278
3492	LRQIFNGTFVK	P18124	RPL7	60S ribosomal protein L7	19.2642	17.7257	0.344243	20.3606	19.9156	19.1603	1.68798	19.9714	19.8621	0.927038		988992	0.0458771			0.0271787
657	DEIGNVSTSHLLILDDSVEMEIRPR	P04843	RPN1	Dolichyl-diphosphooligosaccharide--protein glycosyltransferase subunit 1	25.0253	26.472	2.72584	27.4554	27.1353	27.0768	1.04138	25.3643	27.9124	5.84864		1.47414e+08	6.83821			6.56647
5198	TILPAAAQDVYYRDEIGNVSTSHLLILDDSVEMEIRPR	P04843	RPN1	Dolichyl-diphosphooligosaccharide--protein glycosyltransferase subunit 1	17.3964	24.737	162.084	25.1471	17.349	24.6327	0.00641782	25.2114	27.5234	4.96571		166943	0.00774412			1.20666
2564	IPDHDPAPNVTVLLR	Q9P2E9	RRBP1	Ribosome-binding protein 1	19.0959	16.8881	0.216464	17.529	22.3864	22.1218	1.2013	17.7916	18.0374	1.18575		5.48249e+06	0.25432			0.211704
3753	MESGLLRPAPVSEVIVLHYNYTGK	Q9H228	S1PR5	Sphingosine 1-phosphate receptor 5	19.3593	18.6392	0.607055	19.0946	19.1728	17.5222	3.13964	18.6724	22.6531	15.7874		591001	0.0274152			0.00873194
3331	LMLLHPSPNCSLR	Q12770	SCAP	Sterol regulatory element-binding protein cleavage-activating protein	19.3221	19.6001	1.21251	17.6607	19.4166	18.1812	2.35447	17.675	20.4634	6.90863		699808	0.0324625			0.0137876
2698	IVTDWQNYTR	Q6AZY7	SCARA3	Scavenger receptor class A member 3	16.9351	17.7863	1.804	18.8498	17.2022	17.6314	0.742673	21.0092	22.0459	2.05153		150792	0.00699489			0.00941853
41	AAVHQINFTVGQTSEWIHGIQR	Q6AZY7	SCARA3	Scavenger receptor class A member 3	18.2066	18.3603	1.11242	17.1112	17.555	18.3686	0.56896	17.2945	21.989	25.8932		192567	0.00893274			0.0157001
5229	TLFANGSIYPPNEGFCPCLESGIQNVSTCR	Q8WTV0	SCARB1	Scavenger receptor class B member 1	25.7114	26.3875	1.59781	24.5465	24.6371	19.8741	27.1523	26.6705	27.5098	1.78918		2.60919e+07	1.21034			0.0445762
4868	SNITFNNNDTVSFLEYR	Q8WTV0	SCARB1	Scavenger receptor class B member 1	24.7998	25.9544	2.22623	24.6717	24.6837	24.2081	1.3905	26.2672	27.3317	2.09144		2.69485e+07	1.25008			0.899015
5292	TMVFPVMYLNESVHIDK	Q14108	SCARB2	Lysosome membrane protein 2	27.0919	26.5233	0.674271	25.3353	25.0238	25.2303	0.866637	27.3709	28.7068	2.52433		3.41126e+07	1.5824			1.82591
5293	TMVFPVMYLNESVHIDKETASR	Q14108	SCARB2	Lysosome membrane protein 2	17.199	18.3064	2.15457	19.6213	18.8308	19.0506	0.858684	19.9117	25.0675	35.6493		466268	0.0216291			0.0251887
3953	NGTNDGDYVFLTGEDSYLNFTK	Q14108	SCARB2	Lysosome membrane protein 2	26.1709	28.3644	4.57414	26.182	25.0297	25.4116	0.767426	27.5464	28.3074	1.69466		3.42524e+07	1.58889			2.07041
6258	YKVPAEILANTSDNAGFCIPEGNCLGSGVLNVSICK	Q14108	SCARB2	Lysosome membrane protein 2	17.547	27.2059	808.386	17.7243	24.6855	25.1505	0.724471	26.5505	28.7042	4.44968		2.69821e+07	1.25164			1.72766
5863	VPAEILANTSDNAGFCIPEGNCLGSGVLNVSICK	Q14108	SCARB2	Lysosome membrane protein 2	27.0422	28.667	3.08399	18.2997	23.1968	24.6143	0.37436	27.3614	27.4321	1.05023		9.61463e+06	0.446001			1.19137
2447	ILAPELSHANATR	P51168	SCNN1B	Amiloride-sensitive sodium channel subunit beta	17.9681	17.3953	0.672311	19.0102	18.1187	16.2796	3.57787	20.1245	20.9333	1.75175		284624	0.0132031			0.00369021
1023	EDTVLEVTESNTTSVVDGDKR	Q9NQ36	SCUBE2	Signal peptide, CUB and EGF-like domain-containing protein 2	19.953	22.5373	5.99725	17.5063	18.3782	16.3096	4.19479	22.2428	23.5565	2.48578		340714	0.0158049			0.00376775
5883	VQCSPGHFYNTTTHR	Q9NQ36	SCUBE2	Signal peptide, CUB and EGF-like domain-containing protein 2	19.9439	20.2255	1.21554	18.827	18.4043	18.9133	0.702709	21.278	19.8734	0.377723		346934	0.0160935			0.022902
1022	EDTVLEVTESNTTSVVDGDK	Q9NQ36	SCUBE2	Signal peptide, CUB and EGF-like domain-containing protein 2	15.44	21.4347	63.7653	18.2254	17.0234	17.6272	0.658018	20.9661	18.3472	0.162792		133215	0.00617955			0.00939115
4631	SCLEREDTVLEVTESNTTSVVDGDKR	Q9NQ36	SCUBE2	Signal peptide, CUB and EGF-like domain-containing protein 2	17.7423	17.5995	0.90576	18.1103	17.8372	18.6834	0.556248	18.2688	21.1661	7.45031		234171	0.0108626			0.0195284
5210	TITYGPELQANITAGPAEGSPGSPR	Q7Z5N4	SDK1	Protein sidekick-1	22.7372	23.0292	1.22434	18.3186	19.9247	19.8926	1.0225	16.2	18.4232	4.66928		995250	0.0461674			0.0451515
1916	GNHTQSALLAGLR	Q7Z5N4	SDK1	Protein sidekick-1	19.9813	20.5636	1.49723	18.7124	17.8706	18.2263	0.78149	19.378	18.2016	0.442454		239655	0.0111171			0.0142254
205	AINLTWTKPFDGNSPLIR	Q58EX2	SDK2	Protein sidekick-2	20.761	19.8578	0.534699	17.8504	18.0297	17.1705	1.81403	19.8195	16.3483	0.0901705		267597	0.0124132			0.00684287
3389	LNTTTANTATVEVLAPSAR	Q58EX2	SDK2	Protein sidekick-2	19.8877	19.7131	0.886013	19.2913	19.7145	18.8658	1.80088	17.6117	18.8561	2.3692		860312	0.0399079			0.0221602
1680	FWLVEGNSSR	Q58EX2	SDK2	Protein sidekick-2	19.3985	19.699	1.23157	18.2623	18.2348	17.5328	1.62676	17.4437	18.8457	2.64268		308476	0.0143095			0.00879633
1964	GQTALGFLYASGLGVNSSQAK	Q9UBV2	SEL1L	Protein sel-1 homolog 1	24.1262	23.9681	0.896205	23.4889	23.1717	17.8689	39.4732	25.2216	25.9758	1.6867		9.4488e+06	0.438308	0.747681	0.603689	0.011104	0.104693
3854	MYSEGSDIVPQSNETALHYFK	Q9UBV2	SEL1L	Protein sel-1 homolog 1	26.146	26.5658	1.33774	25.813	26.3331	25.7883	1.45882	27.292	28.6475	2.55886		8.45382e+07	3.92153			2.68816
1003	EASIVGENETYPR	Q9UBV2	SEL1L	Protein sel-1 homolog 1	25.0334	25.188	1.11311	24.9778	25.117	24.7702	1.27174	25.9922	27.1769	2.27316		3.6389e+07	1.688			1.32732
4125	NNTTFLECAPK	Q99985	SEMA3C	Semaphorin-3C	21.17	24.0078	7.14929	20.1144	19.0427	19.4165	0.771747	22.4092	23.8256	2.66919		540037	0.0250511			0.0324602
1883	GLLYAASHSGVVQVPMANCSLYR	Q9NPR2	SEMA4B	Semaphorin-4B	17.4447	22.2556	28.0689	19.7227	18.4256	17.0702	2.55868	21.1416	17.9959	0.112993		352094	0.0163328			0.0063833
2770	KINSSLQLPDR	Q9NPR2	SEMA4B	Semaphorin-4B	20.0756	19.9737	0.931805	18.1548	18.591	17.9835	1.52362	18.4714	19.8017	2.51455		394865	0.0183169			0.012022
2555	INSSLQLPDR	Q9NPR2	SEMA4B	Semaphorin-4B	23.5946	23.9974	1.32207	21.6628	21.8408	21.4351	1.32473	21.2953	22.08	1.72273		3.75609e+06	0.174236			0.131526
1413	FEAEHISNYTALLLSR	Q9NPR2	SEMA4B	Semaphorin-4B	22.6688	23.5754	1.87462	22.3574	22.1595	22.1165	1.03025	22.3693	22.784	1.33302		4.68462e+06	0.217309			0.210927
2024	GTNFTHLVADR	Q9C0C4	SEMA4C	Semaphorin-4C	21.2671	23.4201	4.44752	20.5368	18.7328	18.327	1.32482	19.3086	17.7307	0.334969		435647	0.0202087			0.0152539
853	DPYCAWSVNTSR	Q9C0C4	SEMA4C	Semaphorin-4C	24.0103	24.4133	1.32225	20.8681	21.0394	20.9344	1.07549	19.1962	21.5733	5.19491		2.15521e+06	0.0999755			0.0929577
4014	NITVVAGTDLVLPCHLSSNLAHAR	Q9C0C4	SEMA4C	Semaphorin-4C	20.6693	20.5432	0.916305	19.4708	17.7808	17.916	0.910544	19.0382	19.5919	1.46785		225193	0.0104462			0.0114725
1314	EVHLVQFHEPDIYNYSALLLSEDK	Q92854	SEMA4D	Semaphorin-4D	20.8131	22.6223	3.50448	21.0035	17.9955	16.9241	2.10147	21.425	18.7655	0.158274		261328	0.0121224			0.00576852
935	DVNYTQIVVDR	Q92854	SEMA4D	Semaphorin-4D	19.6767	21.2046	2.88366	18.9978	19.8386	19.4806	1.28165	19.2334	19.4902	1.19483		937592	0.0434927			0.033935
2754	KDVNYTQIVVDR	Q92854	SEMA4D	Semaphorin-4D	19.6966	20.486	1.72836	19.7459	20.271	20.0107	1.19773	19.6835	20.695	2.01601		1.26526e+06	0.0586924			0.0490031
25	AANYTSSLNLPDK	Q92854	SEMA4D	Semaphorin-4D	21.6902	22.9327	2.36608	21.3619	21.1238	21.1856	0.958068	21.1909	21.548	1.28085		2.28506e+06	0.105999			0.110638
4904	SQGYNSSQDLPSLVLDFVK	Q9NTN9	SEMA4G	Semaphorin-4G	18.5874	18.4181	0.889274	18.4338	19.4872	17.9094	2.98514	16.2927	21.383	34.0669		734906	0.0340906			0.0114201
1950	GQAQNYSTLLLEEASAR	Q9NTN9	SEMA4G	Semaphorin-4G	15.9686	17.6037	3.10609	18.8981	17.1278	17.1185	1.00647	20.338	20.7708	1.34985		143213	0.00664331			0.00660062
2645	ITAPTLAPGNSTAVVPTPTPPSK	Q13530	SERINC3	Serine incorporator 3	18.6632	19.648	1.97904	21.4376	16.9844	17.257	0.827826	17.435	21.2325	13.9047		129662	0.00601474			0.0072657
4235	NVTICVPDFGQDLYR	Q86VE9	SERINC5	Serine incorporator 5	22.5874	23.4039	1.76113	19.3435	19.0085	19.5241	0.699502	17.6808	18.6728	1.98894		527386	0.0244642			0.0349738
6282	YLGNATAIFFLPDEGK	P01009	SERPINA1	Alpha-1-antitrypsin;Short peptide from AAT	21.8629	22.9023	2.05537	22.8375	22.574	16.9592	49.0031	26.7542	26.994	1.18083		6.24383e+06	0.289637			0.00591059
1561	FNLTETSEAEIHQSFQHLLR	P01011	SERPINA3	Alpha-1-antichymotrypsin;Alpha-1-antichymotrypsin His-Pro-less	23.9506	23.4131	0.688964	18.2121	17.9777	16.2554	3.29962	18.4969	21.6816	9.09264		258123	0.0119737			0.00362882
6376	YTGNASALFILPDQDK	P01011	SERPINA3	Alpha-1-antichymotrypsin;Alpha-1-antichymotrypsin His-Pro-less	24.9015	25.0059	1.07505	20.5549	21.0423	20.433	1.52552	19.1653	22.3929	9.36708		2.15955e+06	0.100177			0.0656673
6001	VVGVPYQGNATALFILPSEGK	P05154	SERPINA5	Plasma serine protease inhibitor	20.66	17.0234	0.0804034	20.2488	17.0432	17.8099	0.58776	17.9353	17.755	0.882519		135056	0.00626495			0.010659
389	AQLLQGLGFNLTER	P08185	SERPINA6	Corticosteroid-binding globulin	17.3338	19.4025	4.19508	18.8962	18.7394	17.7715	1.95599	27.7294	28.4872	1.69091		437645	0.0203013			0.010379
3863	NASEIEVPFVTR	P07093	SERPINE2	Glia-derived nexin	17.316	17.852	1.44995	20.3871	20.0539	19.954	1.0717	17.785	17.6946	0.939262		1.08849e+06	0.0504927			0.0471146
615	DANLTGLSDNKEIFLSK	Q99574	SERPINI1	Neuroserpin	17.3011	17.0677	0.850628	17.1161	18.1467	18.7871	0.641535	21.9014	21.6475	0.838626		290202	0.0134618			0.0209838
614	DANLTGLSDNK	Q99574	SERPINI1	Neuroserpin	16.7369	16.4868	0.840838	17.2961	16.632	18.324	0.309498	20.5554	21.8909	2.52363		101562	0.00471122			0.0152222
1323	EVPRNDTCPELPPPEWGWR	Q6UXD5	SEZ6L2	Seizure 6-like protein 2	23.8331	23.6967	0.909787	17.0588	20.2012	15.5594	24.9644	23.1886	23.9751	1.72488		1.2055e+06	0.0559204			0.00224001
3202	LLANSSMLGEGQVLR	Q6UXD5	SEZ6L2	Seizure 6-like protein 2	25.6187	25.8591	1.18132	22.0432	22.4421	22.3712	1.05037	25.3669	25.8912	1.43824		5.6983e+06	0.264331			0.251655
2693	IVSPEPGGAVGPNLTCR	Q6UXD5	SEZ6L2	Seizure 6-like protein 2	26.0306	25.901	0.914085	23.0712	22.6273	22.815	0.878004	25.7541	26.3155	1.4757		6.47882e+06	0.300538			0.342296
236	ALAYGEKNLTFEGPLPEKIELLAHK	Q9HAT2	SIAE	Sialate O-acetylesterase	19.7146	20.2395	1.43883	17.3998	17.6928	17.0007	1.61563	22.6764	22.2243	0.730978		211867	0.00982803			0.00608308
4080	NLTFEGPLPEK	Q9HAT2	SIAE	Sialate O-acetylesterase	20.7448	21.5062	1.69513	21.8166	21.357	20.9366	1.3383	23.9274	25.4943	2.96267		2.68595e+06	0.124595			0.0930995
1880	GLLNLTYYQQIQVQK	Q9HAT2	SIAE	Sialate O-acetylesterase	17.2884	17.8642	1.4905	19.1184	17.5058	18.7653	0.417689	24.1048	18.8244	0.0257301		186111	0.00863324			0.0206691
1695	GADFDHVYSGVVNLSTENIYSFNYTSQPDQVTAVR	Q9NXL6	SIDT1	SID1 transmembrane family member 1	22.5972	18.2333	0.0485663	17.6538	17.6859	16.1038	2.99405	23.4751	18.9942	0.0447832		210856	0.00978114			0.00326685
6078	VYVNSSSENLNYPVLVVVR	Q9NXL6	SIDT1	SID1 transmembrane family member 1	23.5574	24.2646	1.63263	17.7079	18.0163	17.276	1.67052	24.1783	24.9779	1.74062		265123	0.0122984			0.00736202
1229	ENQTWNLQR	Q9NXL6	SIDT1	SID1 transmembrane family member 1	22.576	22.6918	1.08358	18.2229	17.4965	17.7605	0.832776	22.7298	23.2711	1.45528		184915	0.00857777			0.0103002
2366	IGNITPADAGTYYCVK	P78324	SIRPA	Tyrosine-protein phosphatase non-receptor type substrate 1	18.2116	18.8646	1.57243	17.6036	19.1753	18.3064	1.82627	18.368	21.8768	11.3829		592026	0.0274627			0.0150376
2014	GTANLSETIR	P78324	SIRPA;SIRPB1	Tyrosine-protein phosphatase non-receptor type substrate 1;Signal-regulatory protein beta-1 isoform 3	19.8485	20.0907	1.18279	19.0122	19.0246	19.0479	0.983979	20.4748	21.1702	1.61933		533305	0.0247388			0.0251416
261	ALGQAANESHNGSILPISWR	Q9NQ25	SLAMF7	SLAM family member 7	18.378	18.1235	0.838278	23.2225	23.5199	23.2977	1.16651	19.6676	17.9711	0.308534		1.20281e+07	0.557954			0.47831
3931	NFSSPILAR	Q9NQ25	SLAMF7	SLAM family member 7	17.1489	16.4962	0.636089	19.9665	20.0604	20.0515	1.00619	18.8089	18.6814	0.915416		1.09341e+06	0.0507207			0.0504087
839	DNSTLAVDIYK	P49281	SLC11A2	Natural resistance-associated macrophage protein 2	23.7572	24.1431	1.30667	22.9536	17.8142	22.7465	0.0327514	24.6886	25.3263	1.55585		230467	0.0106908			0.326424
1528	FLNATCDEYFTR	Q9H2X9	SLC12A5	Solute carrier family 12 member 5	21.3818	22.3229	1.91999	16.1317	18.4926	18.0738	1.33682	17.8207	20.8046	7.91122		368831	0.0171092			0.0127985
1453	FGHFTGFNSSTLK	Q9BXP2	SLC12A9	Solute carrier family 12 member 9	23.7956	24.3129	1.43127	23.6018	22.8737	23.0976	0.856248	22.1267	23.2474	2.17452		7.68546e+06	0.356511			0.416364
3284	LLNCTAPGPDAAAR	Q8N697	SLC15A4	Solute carrier family 15 member 4	23.0581	23.5122	1.36993	23.0747	22.4617	17.9769	22.3903	24.164	25.4434	2.42738		5.77624e+06	0.267947			0.0119671
5022	SYSTTYEERNITGTR	Q15758	SLC1A5	Neutral amino acid transporter B(0)	20.6102	20.7961	1.13753	23.465	23.9882	23.8338	1.11296	21.6663	25.0849	10.693		1.66406e+07	0.771917			0.693572
2900	LATIANFSALGLEPGR	Q9H015	SLC22A4;SLC22A5	Solute carrier family 22 member 4;Solute carrier family 22 member 5	23.8665	24.6657	1.74014	23.6001	22.8613	22.7333	1.09278	24.7664	26.069	2.46673		7.61969e+06	0.35346			0.323451
5865	VPDAANLSSAWR	Q9H015	SLC22A4;SLC22A5	Solute carrier family 22 member 4;Solute carrier family 22 member 5	23.3507	23.9551	1.52035	22.7173	22.3001	22.4808	0.882275	23.9391	24.7688	1.77732		5.16415e+06	0.239553			0.271518
568	CNTTDVSVANGTAELLHTEHIWYPR	Q9UGH3	SLC23A2	Solute carrier family 23 member 2	18.9057	19.8912	1.98	19.9845	18.9648	19.2687	0.81006	20.2488	20.9618	1.63921		511651	0.0237343			0.0292995
3886	NCTEPALHEFPNDIFTNEDRR	Q9HC58	SLC24A3	Sodium/potassium/calcium exchanger 3	17.0301	16.1647	0.548894	17.5805	19.2956	17.7679	2.88326	18.8766	22.1182	9.45843		643509	0.0298509			0.0103532
2940	LDMSQNVSLVTAELSK	Q99808	SLC29A1	Equilibrative nucleoside transporter 1	24.3962	24.8388	1.35905	25.0002	24.9644	25.0518	0.941217	24.7501	24.8004	1.03548		3.27366e+07	1.51857			1.61342
5669	VIEEFYNQTWVHR	P11166	SLC2A1	Solute carrier family 2, facilitated glucose transporter member 1	27.6351	28.7433	2.15577	29.7867	29.5674	29.5762	0.993919	26.7809	27.9449	2.24078		7.95562e+08	36.9043			37.1301
2650	ITFKPIAPSGQNATCTR	Q96QE2	SLC2A13	Proton myo-inositol cotransporter	18.693	18.1706	0.696213	18.5256	16.8216	19.6913	0.136815	22.2578	23.0783	1.76602		115826	0.0053729			0.0392713
5672	VIEQSYNETWLGR	P14672	SLC2A4	Solute carrier family 2, facilitated glucose transporter member 4	20.7345	20.8688	1.09756	20.4721	19.8187	20.2511	0.741028	21.0335	21.9921	1.94342		924748	0.0428969			0.0578884
4075	NLSTCFSSGDLFTAHNFSEQSR	Q15043	SLC39A14	Zinc transporter ZIP14	22.208	23.7413	2.89447	25.1234	24.2236	24.6095	0.765301	23.3401	24.6851	2.5403		1.95898e+07	0.908726			1.18741
3314	LLTSHGMGIQVPLNATEFNYLCPAIINQIDAR	Q13433	SLC39A6	Zinc transporter ZIP6	18.3287	25.0359	104.488	18.3398	17.7049	20.7223	0.123501	22.1084	21.7889	0.801348		213652	0.0099108			0.0802485
6200	YGENNSLSVEGFR	Q13433	SLC39A6	Zinc transporter ZIP6	25.7566	25.919	1.11915	23.7265	17.769	23.4432	0.0195837	23.3934	24.4447	2.0724		223358	0.0103611			0.529065
3248	LLIAGTNSSDLQQILSLLESNK	P08195	SLC3A2	4F2 cell-surface antigen heavy chain	26.1197	27.8473	3.31176	28.2396	27.7993	27.3479	1.36737	28.5534	28.7567	1.15133		2.33573e+08	10.8349			7.92394
620	DASSFLAEWQNITK	P08195	SLC3A2	4F2 cell-surface antigen heavy chain	27.8407	28.9317	2.13022	29.3642	29.0886	29.1703	0.944944	29.5815	30.7568	2.2584		5.70875e+08	26.4816			28.0245
4853	SLVTQYLNATGNR	P08195	SLC3A2	4F2 cell-surface antigen heavy chain	28.5629	29.0088	1.36216	30.1575	30.0588	30.148	0.940044	29.914	30.962	2.06766		1.11841e+09	51.8804			55.1893
759	DLCGPDAGPIGNATGQADCK	Q8NBI5	SLC43A3	Solute carrier family 43 member 3	17.1378	18.061	1.89632	28.0699	27.1781	27.8165	0.642425	23.6926	24.279	1.5015		1.51853e+08	7.04411			10.9649
517	CAPVNISCYAK	Q8WWI5	SLC44A1	Choline transporter-like protein 1	21.0012	21.5634	1.47652	20.1467	20.1023	19.4348	1.58832	20.9193	22.1025	2.2708		1.12563e+06	0.0522154			0.0328746
1355	FAEINGSALCSYNLKPSEYTTSPK	Q8WWI5	SLC44A1	Choline transporter-like protein 1	24.2917	25.176	1.84587	24.1978	24.1528	24.0353	1.08485	24.8209	26.3836	2.95406		1.86517e+07	0.865207			0.797534
2050	GVLMVGNETTYEDGHGSR	Q8IWA5	SLC44A2	Choline transporter-like protein 2	26.9587	27.6682	1.63524	25.3881	25.5858	24.6298	1.93992	27.0899	27.8968	1.74945		5.03609e+07	2.33613			1.20424
2789	KNITDLVEGAK	Q8IWA5	SLC44A2	Choline transporter-like protein 2	24.4746	24.2997	0.885829	23.6869	23.7069	23.6025	1.07505	24.4174	25.2272	1.75297		1.36927e+07	0.635171			0.590831
2051	GVLMVGNETTYEDGHGSRK	Q8IWA5	SLC44A2	Choline transporter-like protein 2	17.3033	16.3472	0.515448	17.8618	17.8848	17.9731	0.94063	17.7868	22.8147	32.6249		242026	0.011227			0.0119356
4006	NITDLVEGAK	Q8IWA5	SLC44A2	Choline transporter-like protein 2	26.9677	27.5756	1.52404	25.9266	25.648	25.7524	0.930192	27.119	28.1192	2.00028		5.25796e+07	2.43905			2.62209
1607	FSADLGYNGTR	Q96NT5	SLC46A1	Proton-coupled folate transporter	22.8377	23.0755	1.17919	23.4825	23.1409	18.1177	32.5188	23.934	24.8473	1.88335		9.24922e+06	0.42905			0.0131939
2747	KDNITAHNISWR	Q9Y6M7	SLC4A7	Sodium bicarbonate cotransporter 3	19.147	17.8114	0.396227	20.4397	19.8629	20.5607	0.616512	21.031	23.2751	4.73741		953518	0.0442315			0.0717448
4896	SPIVTHCNVSTVNK	Q9UN76	SLC6A14	Sodium- and chloride-dependent neutral and basic amino acid transporter B(0+)	26.1694	26.3334	1.12039	16.1315	18.5401	16.499	4.11559	18.5946	19.6478	2.07513		381177	0.0176819			0.00429632
1846	GISYYIGAQSNFTK	Q9UN76	SLC6A14	Sodium- and chloride-dependent neutral and basic amino acid transporter B(0+)	26.257	26.9622	1.63037	18.0606	16.9444	18.2384	0.407819	18.9821	18.4941	0.713013		126117	0.00585027			0.0143453
2110	HEDCANASLANLTCDQLADR	P48029	SLC6A8	Sodium- and chloride-dependent creatine transporter 1	21.2915	21.3896	1.07036	18.8528	19.4237	18.9909	1.34985	21.0046	21.9057	1.86749		703261	0.0326227			0.0241676
4266	PAALPSNLSHLLNHSLQR	P48067	SLC6A9	Sodium- and chloride-dependent glycine transporter 1	19.8141	20.7834	1.95789	21.3838	21.2626	21.7792	0.699017	20.9809	21.1939	1.1591		2.51582e+06	0.116703			0.166953
2003	GSSTGAHISPQFPASGVNQTPVVDCR	Q6J4K2	SLC8B1	Sodium/potassium/calcium exchanger 6, mitochondrial	17.9819	18.4614	1.39426	20.8474	20.7287	16.81	15.1233	18.224	19.0932	1.82665		1.73764e+06	0.0806053			0.00532988
5514	VCGLNVSDR	Q6J4K2	SLC8B1	Sodium/potassium/calcium exchanger 6, mitochondrial	20.2715	20.9368	1.5859	20.3771	17.6691	19.9421	0.206899	20.9369	20.0608	0.544838		208415	0.0096679			0.0467276
140	AFSTLLVNVSGK	Q96T83	SLC9A7	Sodium/hydrogen exchanger 7	25.5643	26.0096	1.3616	25.7159	25.0646	25.0087	1.03951	24.7211	25.7763	2.07801		3.50911e+07	1.62779			1.56593
904	DVCAANGSGGDEGPDPDLICR	Q9UIG8	SLCO3A1	Solute carrier organic anion transporter family member 3A1	21.678	18.0399	0.0803198	18.9394	20.6307	16.7864	14.3631	18.2051	18.2372	1.0225		1.62353e+06	0.0753117			0.0052434
633	DCSCIPQNLSSGFGHATAGK	Q96BD0	SLCO4A1	Solute carrier organic anion transporter family member 4A1	23.1481	23.3276	1.13249	18.2628	17.5178	15.9579	2.94833	18.5609	17.1635	0.379613		187665	0.00870535			0.00295263
1742	GDVFHNLTNLR	Q8IW52	SLITRK4	SLIT and NTRK-like protein 4	20.1426	18.8084	0.396612	20.3166	17.5053	18.0914	0.666141	23.0072	23.1844	1.13069		186046	0.00863025			0.0129556
2330	IEVLEEGSFMNLTR	Q9H5Y7	SLITRK6	SLIT and NTRK-like protein 6	16.9867	21.195	18.4852	19.8765	16.5631	16.8652	0.811071	17.8768	18.8579	1.97397		96825.5	0.00449152			0.00553776
1568	FNSSGQCEVPLVR	Q99835	SMO	Smoothened homolog	17.6081	17.4245	0.880503	18.2583	18.4504	18.2475	1.15101	20.7087	21.6742	1.95274		358199	0.016616			0.014436
919	DVFGWGNLTCPICK	P17405	SMPD1	Sphingomyelin phosphodiesterase	19.2014	17.5838	0.325877	22.0974	21.6851	21.6709	1.00989	19.7535	20.1658	1.33081		3.37183e+06	0.156411			0.154879
6067	VYIIAHVPVGYLPSSQNITAMR	Q92484	SMPDL3A	Acid sphingomyelinase-like phosphodiesterase 3a	21.291	17.8849	0.0943326	16.7826	19.4573	16.9173	5.81589	18.0098	18.153	1.10435		719832	0.0333913			0.0057414
825	DMVTYFMNLSQANAQGTPR	Q92485	SMPDL3B	Acid sphingomyelinase-like phosphodiesterase 3b	21.7814	21.5042	0.825191	19.2086	16.6614	17.6791	0.493903	25.1291	26.3602	2.34746		103653	0.00480822			0.00973514
4314	PWLSNESIALFK	Q92485	SMPDL3B	Acid sphingomyelinase-like phosphodiesterase 3b	16.7839	21.9137	35.0125	18.1792	17.3622	18.4456	0.471915	23.3211	23.0421	0.824162		168478	0.0078153			0.0165608
2920	LDAFFALEGFPTEPNSSSR	P08294	SOD3	Extracellular superoxide dismutase [Cu-Zn]	17.4947	17.2602	0.84998	21.9723	21.6983	21.4234	1.20991	24.3813	25.7049	2.5029		3.40282e+06	0.157849			0.130463
324	AMYVNLTLTGEPIR	Q96PQ0	SORCS2	VPS10 domain-containing receptor SorCS2	17.1166	21.2254	17.2533	23.1457	23.3035	23.1982	1.07572	18.6397	17.8381	0.573713		1.03527e+07	0.480237			0.446434
4642	SDEYNCSSGMCIR	Q92673	SORL1	Sortilin-related receptor	18.353	19.6622	2.47804	18.6757	18.0795	17.1748	1.87216	20.2449	20.7875	1.4566		276995	0.0128492			0.0068633
207	AINQTAVECTWTGPR	Q92673	SORL1	Sortilin-related receptor	17.1125	18.1584	2.06465	21.5223	17.338	16.9274	1.32924	24.8834	22.3923	0.177871		165675	0.0076853			0.00578173
5633	VGNLTAHTSYEISAWAK	Q92673	SORL1	Sortilin-related receptor	15.8664	18.0335	4.4912	17.4997	18.0849	17.7366	1.27306	17.0621	23.3325	77.1931		278034	0.0128973			0.010131
3565	LTIVNSSVLDRPR	Q92673	SORL1	Sortilin-related receptor	21.1375	21.1909	1.03771	21.5725	21.2583	21.2558	1.00173	25.081	26.0418	1.94639		2.50834e+06	0.116356			0.116155
33	AASNFTEIK	Q92673	SORL1	Sortilin-related receptor	16.433	18.7351	4.93175	17.006	16.6186	16.6375	0.986985	20.8573	19.4066	0.365844		100623	0.00466767			0.00472922
6066	VYGQVSLNDSHNQMVVHWAGEK	Q92673	SORL1	Sortilin-related receptor	18.649	19.1305	1.39619	19.592	19.1883	19.6479	0.727188	23.4077	24.9873	2.98887		597384	0.0277113			0.0381075
2079	GYEIHMFDSAMNITAYLGNTTDNFFK	Q92673	SORL1	Sortilin-related receptor	19.4314	20.6633	2.34876	19.8469	19.5394	20.0003	0.726533	24.1341	25.4073	2.41697		761983	0.0353467			0.0486512
6221	YHIIVQLGNMSK	Q92673	SORL1	Sortilin-related receptor	17.1307	18.1645	2.04741	19.2168	17.1483	17.7345	0.666095	23.088	24.3574	2.41061		145262	0.00673838			0.0101162
5552	VEGLQGVYIATLINGSMNEENMR	Q92673	SORL1	Sortilin-related receptor	15.9241	16.6679	1.67458	19.0122	16.0923	17.499	0.377173	16.9063	24.997	272.611		69865.9	0.00324092			0.00859264
3761	MGHNYTFTVQAR	Q92673	SORL1	Sortilin-related receptor	18.5336	17.9515	0.667991	19.3351	15.8264	18.027	0.217547	23.1669	24.4511	2.43547		58106	0.00269541			0.01239
2183	HLYTTTGGETDFTNVTSLR	Q99523	SORT1	Sortilin	26.3971	27.4212	2.03369	26.0383	25.6592	25.4091	1.18929	26.5482	28.1313	2.99613		5.29894e+07	2.45806			2.06683
744	DITDLINNTFIR	Q99523	SORT1	Sortilin	27.7102	28.3596	1.56852	26.1118	25.4981	25.3336	1.12078	27.7153	28.8246	2.15741		4.73907e+07	2.19835			1.96145
2883	LANNTHQHVFDDLR	Q99523	SORT1	Sortilin	25.8632	26.1511	1.22086	24.4672	23.8886	23.8905	0.998684	25.7993	26.8225	2.03242		1.55305e+07	0.720424			0.721373
519	CATVTENATGDLATSR	O43291	SPINT2	Kunitz-type protease inhibitor 2	24.1688	24.5274	1.28218	22.7184	23.3902	23.1333	1.19491	23.143	24.2596	2.16835		1.09939e+07	0.509982			0.426796
822	DMNQTLGDNITVK	Q8TCT8	SPPL2A	Signal peptide peptidase-like 2A	27.0165	27.1891	1.12709	24.7267	24.7762	24.6308	1.10604	25.643	26.5432	1.86632		2.87329e+07	1.33285			1.20507
1789	GGAEAMLVVNNSVLFPPSGNRSEFPDVK	Q8TCT8	SPPL2A	Signal peptide peptidase-like 2A	17.0649	17.2937	1.17186	21.1441	21.3987	21.4342	0.975694	17.1705	23.8188	100.308		2.76472e+06	0.128249			0.131444
1788	GGAEAMLVVNNSVLFPPSGNR	Q8TCT8	SPPL2A	Signal peptide peptidase-like 2A	24.7062	25.5967	1.85382	22.793	22.525	22.6981	0.886935	22.7929	23.963	2.25027		6.03532e+06	0.279965			0.315654
4245	NWTASLLCSAADLPAR	Q8TCT7	SPPL2B	Signal peptide peptidase-like 2B	21.5567	22.7598	2.30234	20.6261	20.2013	18.9753	2.33918	21.2214	22.5093	2.44172		1.20558e+06	0.0559243			0.0239077
1316	EVLDYSTPTTNGTPEAALSEDINLIR	P08240	SRPR	Signal recognition particle receptor subunit alpha	20.1888	16.5322	0.0792964	21.4918	19.1558	19.1377	1.01262	20.5273	19.9339	0.662779		584077	0.027094			0.0267562
6334	YPQDYQFYIQNFTALPLNTVVPPQR	P43307	SSR1	Translocon-associated protein subunit alpha	27.4523	27.8041	1.27615	29.5106	27.4143	29.3327	0.264548	28.5183	29.636	2.17001		1.78866e+08	8.29716			31.3636
2261	IAPASNVSHTVVLR	P43308	SSR2	Translocon-associated protein subunit beta	22.4478	23.1395	1.61519	23.6098	23.8601	23.3199	1.45417	22.8465	23.3307	1.39881		1.52267e+07	0.706332			0.485727
2262	IAPASNVSHTVVLRPLK	P43308	SSR2	Translocon-associated protein subunit beta	27.4842	26.6248	0.551182	28.2255	28.0063	27.8079	1.14743	21.5955	27.9317	80.7953		2.6961e+08	12.5066			10.8997
175	AGYFNFTSATITYLAQEDGPVVIGSTSAPGQGGILAQR	P43308	SSR2	Translocon-associated protein subunit beta	24.166	26.8094	6.24802	27.3809	26.8028	26.8847	0.944813	26.8542	27.5533	1.62349		1.1707e+08	5.43062			5.74783
5689	VINQTTCENLLPQQITPR	Q9Y5Y6	ST14	Suppressor of tumorigenicity 14 protein	23.948	25.2728	2.50498	16.833	17.8641	17.7736	1.06474	26.8109	27.8639	2.07484		238578	0.0110671			0.0103942
1566	FNQTMQPLLTAQNALLEDDTYR	Q11201	ST3GAL1	CMP-N-acetylneuraminate-beta-galactosamide-alpha-2,3-sialyltransferase 1	21.5433	23.9972	5.47895	20.6071	21.6902	20.669	2.02961	22.5183	23.6486	2.18904		3.38377e+06	0.156965			0.0773378
5164	TGVHDADFESNVTATLASINK	Q11201	ST3GAL1	CMP-N-acetylneuraminate-beta-galactosamide-alpha-2,3-sialyltransferase 1	24.7452	24.6652	0.946058	23.3617	23.2751	22.7238	1.46541	23.8083	25.1551	2.54347		1.01509e+07	0.470876			0.321328
1156	ELGDNVSMILVPFK	Q11201	ST3GAL1	CMP-N-acetylneuraminate-beta-galactosamide-alpha-2,3-sialyltransferase 1	22.4143	23.379	1.95166	21.3307	22.0775	22.1225	0.96929	22.9982	24.0339	2.05011		4.42578e+06	0.205302			0.211806
3487	LRNSSLGDAINK	Q11206	ST3GAL4	CMP-N-acetylneuraminate-beta-galactosamide-alpha-2,3-sialyltransferase 4	18.3292	18.7527	1.34118	18.5436	17.9752	18.2046	0.85299	19.8711	20.602	1.65967		257676	0.011953			0.0140131
3016	LFGNYSR	Q11206	ST3GAL4	CMP-N-acetylneuraminate-beta-galactosamide-alpha-2,3-sialyltransferase 4	19.9922	20.546	1.46795	17.9315	16.5347	17.677	0.453037	21.6506	20.2942	0.390556		94938.1	0.00440396			0.00972098
714	DHVNVSMVEVTDFPFNTSEWEGYLPK	P15907	ST6GAL1	Beta-galactoside alpha-2,6-sialyltransferase 1	18.6368	17.8971	0.598864	17.932	17.5857	17.6173	0.978335	15.7608	25.0357	619.474		196709	0.00912486			0.00932693
1895	GLSHQVIASTLSLLNGSESAK	Q9UJ37	ST6GALNAC2	Alpha-N-acetylgalactosaminide alpha-2,6-sialyltransferase 2	21.8234	18.1588	0.0788579	18.2172	18.6338	16.458	4.51836	22.2317	18.8401	0.0952855		406755	0.0188684			0.00417594
2556	INSSLVLEIR	Q92187	ST8SIA4	CMP-N-acetylneuraminate-poly-alpha-2,8-sialyltransferase	18.749	20.5683	3.5291	18.4803	18.3392	18.5936	0.838336	18.3457	18.8562	1.42454		331627	0.0153834			0.0183499
2907	LAVTNTTMTGTVLK	Q13586	STIM1	Stromal interaction molecule 1	17.9515	23.6104	50.5241	25.2579	25.8088	22.9574	7.217	21.4476	24.3514	7.48395		5.87791e+07	2.72663			0.377806
5201	TILVDNNTWNNTHISR	P46977	STT3A	Dolichyl-diphosphooligosaccharide--protein glycosyltransferase subunit STT3A	28.0013	28.3289	1.25492	28.0534	28.1242	28.0003	1.08968	28.3033	29.5042	2.29883		2.92569e+08	13.5716			12.4547
5395	TTLVDNNTWNNSHIALVGK	Q8TCJ2	STT3B	Dolichyl-diphosphooligosaccharide--protein glycosyltransferase subunit STT3B	27.8028	28.6839	1.84178	28.608	26.155	28.4084	0.209729	28.2306	29.2448	2.01978		7.47205e+07	3.46611			16.5266
256	ALEVNMSLSGR	Q9UBS9	SUCO	SUN domain-containing ossification factor	21.6602	22.615	1.93831	17.8273	20.4695	20.071	1.31814	20.7282	23.0836	5.11736		1.45189e+06	0.0673498			0.0510947
1688	FYNYTVCR	Q8IWU6	SULF1	Extracellular sulfatase Sulf-1	20.3644	21.4292	2.09188	18.7872	18.4142	16.2965	4.34001	19.871	20.7553	1.84587		349322	0.0162043			0.00373369
5112	TFAVYLNNTGYR	Q8IWU6	SULF1	Extracellular sulfatase Sulf-1	21.65	22.9472	2.45751	18.1189	17.9308	18.6842	0.593204	21.3155	21.7367	1.33904		249867	0.0115908			0.0195392
5113	TFAVYLNSTGYR	Q8IWU5	SULF2	Extracellular sulfatase Sulf-2	24.6643	25.5341	1.82741	17.7734	18.0917	17.1457	1.92652	18.6147	19.6637	2.0691		279347	0.0129583			0.00672625
1687	FYNYTLCR	Q8IWU5	SULF2	Extracellular sulfatase Sulf-2	23.9237	24.6549	1.66002	18.6091	17.99	17.4786	1.42543	17.8487	19.0478	2.29596		260333	0.0120763			0.008472
580	CYILENDTVQCDLDLYK	Q8IWU5	SULF2	Extracellular sulfatase Sulf-2	20.7351	22.4773	3.34545	18.3547	17.2774	17.0083	1.20506	17.5472	18.5872	2.05623		158860	0.00736917			0.00611521
1665	FVNSTGYLTEAEK	Q8NBK3	SUMF1	Sulfatase-modifying factor 1	22.3079	22.5412	1.17552	23.3006	23.4034	23.2761	1.09225	24.9566	26.2782	2.49943		1.1095e+07	0.514669			0.471202
5268	TLSPTGNISSAPK	O94901	SUN1	SUN domain-containing protein 1	21.7048	22.2523	1.46155	23.3147	23.5133	23.2208	1.22476	22.3288	23.5601	2.34778		1.19732e+07	0.555407			0.453482
300	ALSPNSTISSAPK	Q9UH99	SUN2	SUN domain-containing protein 2	21.1812	21.8128	1.54928	24.4363	25.0514	24.6379	1.33191	24.2495	25.288	2.05409		3.47715e+07	1.61297			1.21102
4330	QCNQTSVCWCVNSVGVR	P09758	TACSTD2	Tumor-associated calcium signal transducer 2	18.7553	22.2207	11.0456	22.6966	22.7838	21.9554	1.77571	23.8315	25.5887	3.38041		7.22116e+06	0.334973			0.188641
2209	HRPTAGAFNHSDLDAELRR	P09758	TACSTD2	Tumor-associated calcium signal transducer 2	22.7157	23.8615	2.21269	22.9885	23.103	22.3051	1.73857	25.1154	26.7655	3.13855		9.0094e+06	0.417926			0.240385
2208	HRPTAGAFNHSDLDAELR	P09758	TACSTD2	Tumor-associated calcium signal transducer 2	26.2167	24.0223	0.218484	25.7853	25.4219	25.339	1.05914	24.2047	27.9339	13.2618		4.49526e+07	2.08525			1.9688
4307	PTAGAFNHSDLDAELR	P09758	TACSTD2	Tumor-associated calcium signal transducer 2	17.9012	23.4616	47.1897	21.2745	21.0964	21.1484	0.964598	23.5091	23.5431	1.02385		2.24207e+06	0.104005			0.107822
2691	IVNVTANLISSSFPEANSGNER	Q2MV58	TCTN1	Tectonic-1	19.475	20.1653	1.61362	18.7425	18.941	19.9462	0.498201	19.6414	22.9087	9.62843		503279	0.023346			0.0468606
1591	FQINYTEYDCNR	Q96GX1	TCTN2	Tectonic-2	18.5465	19.7593	2.31787	19.7663	20.0451	20.0469	0.998753	19.9419	20.9364	1.99239		1.08187e+06	0.0501856			0.0502483
5931	VSVSLGQTNLTVEPGASLQQHFILR	Q6NUS6	TCTN3	Tectonic-3	16.1266	20.0691	15.3748	20.8445	19.5315	18.8715	1.58008	19.3697	23.1993	14.2175		757822	0.0351536			0.022248
3074	LGGFTQENNTIDSGELDIGRR	Q9P273	TENM3	Teneurin-3	17.3789	17.6843	1.23576	18.8386	18.8394	17.5168	2.50116	21.6601	24.4791	7.05673		469056	0.0217584			0.00869932
4567	RNMTLPGENGQNLVEWR	Q9P273	TENM3	Teneurin-3	19.285	17.897	0.382094	17.7029	18.5974	17.5804	2.02371	18.7194	22.502	13.7618		396621	0.0183983			0.0090914
1558	FNISLQK	Q9P273	TENM3	Teneurin-3	18.221	17.591	0.646176	19.113	18.3856	17.7083	1.59914	18.8937	23.935	32.9293		342466	0.0158862			0.00993419
1971	GQVLTADGTPLIGVNVSFFHYPEYGYTITR	Q9P273	TENM3	Teneurin-3	17.936	18.4639	1.44183	18.0698	17.8787	17.3706	1.42218	17.2556	22.6059	40.7944		241004	0.0111796			0.00786094
4105	NMTLPGENGQNLVEWR	Q9P273	TENM3	Teneurin-3	17.4507	18.7905	2.53116	17.2902	17.3098	18.1263	0.567818	22.3293	23.9282	3.02912		162468	0.00753654			0.0132728
2370	IGPFANTTK	Q9P273	TENM3	Teneurin-3	17.2003	17.2133	1.00905	16.9279	16.605	17.425	0.566442	22.8704	23.8711	2.00097		99678.9	0.00462387			0.00816302
3329	LMAVNVTYSSTGQIASIQR	Q9P273	TENM3	Teneurin-3	16.3198	16.6323	1.24186	16.4507	17.0456	17.9757	0.524822	22.0435	23.04	1.99515		135281	0.00627538			0.0119572
3073	LGGFTQENNTIDSGELDIGR	Q9P273	TENM3	Teneurin-3	17.9969	17.8491	0.902626	17.4333	16.8083	17.8527	0.484847	24.4532	25.6444	2.28343		114763	0.0053236			0.01098
3581	LTNVTFPTGVVTNLHGDMDK	Q9P273	TENM3	Teneurin-3	17.1541	16.6841	0.721965	19.3052	16.8728	18.6822	0.28531	25.4661	26.6983	2.34925		120010	0.00556701			0.0195122
653	DEGLCSANVTR	P48307	TFPI2	Tissue factor pathway inhibitor 2	18.9542	18.5778	0.770357	17.0906	20.4804	15.8634	24.5389	19.4787	19.077	0.756966		1.4629e+06	0.0678606			0.00276543
6185	YFFNLSSMTCEK	P48307	TFPI2	Tissue factor pathway inhibitor 2	18.7447	20.1505	2.64965	20.7834	20.9569	20.9488	1.00563	17.3592	19.4825	4.35689		2.03543e+06	0.0944188			0.0938902
670	DFEDLYTPVNGSIVIVR	P02786	TFRC	Transferrin receptor protein 1;Transferrin receptor protein 1, serum form	29.3997	30.4359	2.05082	28.9169	28.6888	28.3861	1.23345	31.268	31.8691	1.51687		4.32702e+08	20.0721			16.2731
2744	KDFEDLYTPVNGSIVIVR	P02786	TFRC	Transferrin receptor protein 1;Transferrin receptor protein 1, serum form	26.2403	26.8941	1.57331	27.0566	26.238	26.3154	0.947764	28.6473	27.7	0.518602		7.91453e+07	3.67137			3.87372
2893	LASPPSQGEVPPGPLPEAVLALYNSTR	P01137	TGFB1	Transforming growth factor beta-1;Latency-associated peptide	17.8274	23.1763	40.7549	24.7346	24.1868	24.0705	1.08395	19.6701	20.0185	1.27315		1.90964e+07	0.88584			0.817232
4448	QSTHSIYMFFNTSELR	P01137	TGFB1	Transforming growth factor beta-1;Latency-associated peptide	18.7428	18.9702	1.17072	21.6015	18.7833	20.4101	0.323806	18.5928	18.5688	0.983502		451166	0.0209286			0.0646331
3590	LTSPPEDYPEPEEVPPEVISIYNSTR	P61812	TGFB2	Transforming growth factor beta-2;Latency-associated peptide	18.1443	19.3508	2.30777	24.6438	18.7843	18.2474	1.45085	18.3011	17.7525	0.683683		451479	0.0209431			0.014435
1574	FNVSSVEK	P10600	TGFB3	Transforming growth factor beta-3;Latency-associated peptide	17.1703	17.9838	1.75747	18.3929	16.7678	15.6967	2.10103	22.8871	24.4849	3.02681		111586	0.00517623			0.00246366
3591	LTSPPEPTVMTHVPYQVLALYNSTR	P10600	TGFB3	Transforming growth factor beta-3;Latency-associated peptide	17.1283	19.4445	4.98019	18.184	16.6573	16.5981	1.04189	25.0345	26.8143	3.43379		103359	0.00479457			0.00460181
830	DNFTCVTDGLCFVSVTETTDK	P36897	TGFBR1	TGF-beta receptor type-1	19.8137	22.1219	4.95265	21.6999	17.6096	21.9034	0.0509844	20.2281	22.2745	4.13074		199994	0.00927728			0.181963
4633	SCMSNCSITSICEKPQEVCVAVWR	P37173	TGFBR2	TGF-beta receptor type-2	19.7914	20.8663	2.10658	22.2903	17.6837	16.3128	2.58632	18.1347	18.7382	1.5194		210535	0.00976623			0.00377611
1778	GFQWVTGDNNTSYSR	P07204	THBD	Thrombomodulin	21.8346	23.2301	2.6308	23.8344	24.1345	23.7402	1.3143	17.8512	19.134	2.43311		1.84166e+07	0.854302			0.650003
3069	LGFLGNQSQGCLPAR	P49746	THBS3	Thrombospondin-3	16.582	18.343	3.38933	17.6376	17.4279	18.0577	0.646266	20.1891	20.6305	1.35792		176328	0.00817944			0.0126565
2546	INITEMYK	Q6ZMP0	THSD4	Thrombospondin type-1 domain-containing protein 4	17.305	17.4328	1.09263	18.2634	18.619	18.2558	1.28628	16.9336	20.5647	12.39		402603	0.0186759			0.0145193
1660	FVGTPEVNQTTLYQR	P01033	TIMP1	Metalloproteinase inhibitor 1	25.0623	25.7923	1.65864	26.3941	26.6014	26.2244	1.29864	23.743	24.6567	1.88387		1.01817e+08	4.72305			3.63692
4759	SIINATDP	P35625	TIMP3	Metalloproteinase inhibitor 3	19.3561	19.391	1.02449	22.7428	21.9294	21.9258	1.0025	19.1008	18.6837	0.748929		3.99399e+06	0.185272			0.18481
6298	YLNLSSTR	O60603	TLR2	Toll-like receptor 2	19.4001	19.7859	1.30658	20.8801	21.2545	20.7172	1.45125	17.6494	19.2006	2.93061		2.50174e+06	0.11605			0.0799653
4085	NLTNIDISK	O60603	TLR2	Toll-like receptor 2	19.2673	21.7835	5.72073	21.5916	21.252	21.2037	1.03405	17.5553	17.7817	1.16991		2.49741e+06	0.115849			0.112035
2913	LCLELANTSIR	O15455	TLR3	Toll-like receptor 3	18.0625	17.2783	0.580674	21.8108	21.692	21.3708	1.24937	19.6888	19.985	1.22791		3.38799e+06	0.157161			0.125793
4675	SEELDIFANSSLK	O15455	TLR3	Toll-like receptor 3	16.8457	18.7447	3.72955	17.8181	21.7016	21.4039	1.22918	20.5103	20.7673	1.19499		3.41061e+06	0.158211			0.128712
3586	LTQVPDDLPTNITVLNLTHNQLR	O15455	TLR3	Toll-like receptor 3	17.3153	17.3553	1.02811	23.6593	17.4348	23.3846	0.0161783	21.496	22.0413	1.45932		177173	0.00821865			0.508006
2549	INLTANLIHLSENR	O60602	TLR5	Toll-like receptor 5	18.4948	18.6981	1.15133	17.9409	18.8619	19.3575	0.709267	20.049	20.6041	1.46927		476428	0.0221004			0.0311595
1387	FCNLTQVPQVLNTTER	O60602	TLR5	Toll-like receptor 5	19.4691	18.7701	0.615999	18.9861	16.6635	17.7564	0.468818	20.5617	20.873	1.24083		103804	0.00481522			0.010271
883	DSSGNETHFTGNEVGFFKPISCR	Q9BX74	TM2D1	TM2 domain-containing protein 1	18.2896	17.3503	0.521486	17.5899	22.9444	17.8225	34.8213	23.9623	25.446	2.79665		8.07147e+06	0.374417			0.0107525
3514	LSITNETFR	Q9BX74	TM2D1	TM2 domain-containing protein 1	21.1655	21.6201	1.3704	22.1881	22.1326	21.9659	1.12249	22.6865	23.8047	2.17076		4.59808e+06	0.213294			0.190019
3402	LPADCIDCTTNFSCTYGK	Q9BRN9	TM2D3	TM2 domain-containing protein 3	21.6334	24.5767	7.69169	22.2382	20.4918	20.1168	1.29684	23.3817	23.3247	0.961261		1.47451e+06	0.0683989			0.0527428
2404	IIFANVSVR	O15321	TM9SF1	Transmembrane 9 superfamily member 1	25.3503	26.0194	1.59008	23.9522	23.8007	23.8667	0.955283	25.5702	25.8374	1.20347		1.46125e+07	0.677841	1.46129	1.62284	0.70957	0.281436
2673	IVDVNLTSEGKVK	Q9HD45	TM9SF3	Transmembrane 9 superfamily member 3	20.637	17.4053	0.106454	19.0414	20.4323	19.2974	2.19603	22.8399	18.8265	0.0619222		1.41493e+06	0.0656354			0.0298882
2672	IVDVNLTSEGK	Q9HD45	TM9SF3	Transmembrane 9 superfamily member 3	27.4639	27.9251	1.37669	27.3038	26.8935	26.7256	1.12342	29.1002	30.2619	2.23721		1.24667e+08	5.783			5.14766
1182	ELNESENSVFQAVYGLQR	Q6UWJ1	TMCO3	Transmembrane and coiled-coil domain-containing protein 3	20.1395	22.4054	4.80954	20.295	19.4916	20.5658	0.474934	22.9083	22.628	0.82342		737151	0.0341947			0.0719989
1644	FTFTSHTPGDHQICLHSNSTR	Q7Z7H5	TMED4	Transmembrane emp24 domain-containing protein 4	25.288	25.4969	1.15581	27.39	26.0951	26.3898	0.815242	25.688	28.2537	5.92042		7.16816e+07	3.32515			4.07872
1645	FTFTSHTPGEHQICLHSNSTK	Q9BVK6	TMED9	Transmembrane emp24 domain-containing protein 9	25.5608	25.5199	0.972048	28.1411	27.0692	26.9729	1.06903	26.8021	26.8893	1.06231		1.40812e+08	6.53197			6.11019
4696	SEQLVNFTGK	Q9BVX2	TMEM106C	Transmembrane protein 106C	21.7628	21.7313	0.978403	21.8391	21.9697	21.8443	1.09081	22.4465	23.2498	1.74509		4.10713e+06	0.19052			0.17466
2493	ILPGGNTSFDVVFLAR	Q92545	TMEM131	Transmembrane protein 131	20.7103	21.8586	2.21653	22.9361	21.5883	22.081	0.710694	22.1563	22.8699	1.63989		3.15301e+06	0.146261			0.2058
2188	HNFTASLLTLR	Q24JP5	TMEM132A	Transmembrane protein 132A	21.3428	21.5313	1.13958	20.5201	20.1443	18.1578	3.96274	22.1513	23.0344	1.84433		1.15888e+06	0.0537578			0.0135658
5895	VQQVGHYPPANSSLSSR	Q24JP5	TMEM132A	Transmembrane protein 132A	16.6678	20.2447	11.9331	18.8708	17.8291	18.6554	0.563974	20.9316	22.3492	2.67141		232859	0.0108018			0.019153
4081	NLTFNITK	H3BS89	TMEM178B	Transmembrane protein 178B	20.8618	21.073	1.15765	17.359	17.6557	18.3663	0.611066	19.1667	19.6237	1.37268		206488	0.00957852			0.0156751
569	CPLYGVATLNGSSLALSR	Q7Z7N9	TMEM179B	Transmembrane protein 179B	21.9331	22.1151	1.13446	20.5049	20.1762	19.8275	1.27341	22.9433	21.6736	0.414746		1.18479e+06	0.0549597			0.0431594
5694	VIQTSAANFSLNNSK	Q9P2C4	TMEM181	Transmembrane protein 181	24.0723	24.4364	1.28708	24.7478	24.4554	23.0626	2.62588	24.2664	25.5241	2.39114		2.30043e+07	1.06712			0.406385
3346	LNDTYVNVGLYSTK	O14524	TMEM194A	Transmembrane protein 194A	23.9174	24.562	1.56331	23.6645	23.4827	23.2838	1.14782	23.64	24.8567	2.32414		1.17219e+07	0.543751			0.473724
1131	EKLNDTYVNVGLYSTK	O14524	TMEM194A	Transmembrane protein 194A	18.7998	18.1697	0.646132	19.3193	18.784	18.986	0.869345	19.0217	21.4639	5.4347		451385	0.0209387			0.0240857
4325	QAWALVGVIDGGSTSCNESVR	Q9UHN6	TMEM2	Transmembrane protein 2	19.8627	20.8792	2.02301	20.7357	20.2188	17.0731	8.85014	18.1556	19.7039	2.92472		1.2203e+06	0.0566067			0.00639614
3935	NFTSVHLSYVELK	Q9UHN6	TMEM2	Transmembrane protein 2	21.0803	17.9661	0.115487	21.8304	18.6072	20.8402	0.212716	18.5341	17.9099	0.648779		399324	0.0185237			0.087082
1740	GDPSVISVNGTDFTFR	Q9UHN6	TMEM2	Transmembrane protein 2	23.2846	23.9585	1.59538	23.8206	18.0804	23.8078	0.0188747	21.8261	23.5087	3.21006		277168	0.0128572			0.681185
5253	TLNSSGLPFGSYTFEK	Q9UHN6	TMEM2	Transmembrane protein 2	23.5826	17.0407	0.0107323	23.9264	17.7047	23.6434	0.0163032	22.4086	23.9222	2.85522		213622	0.00990943			0.607821
2153	HHYEVIPPLTSPGQPGDMNCTTQR	Q9H813	TMEM206	Transmembrane protein 206	18.6397	18.9694	1.25675	18.1553	18.1384	16.8167	2.4996	20.9769	25.4811	22.6934		288538	0.0133846			0.00535469
2561	INYTDPFSNQTVK	Q9H813	TMEM206	Transmembrane protein 206	22.1777	22.7727	1.51047	25.2259	24.9652	24.9772	0.991717	25.6723	26.7761	2.1492		3.27547e+07	1.51942			1.53211
5043	TAGTCLYFSAVPGILPSSQPPISCSEEGAGNATLSPR	Q86XT9	TMEM219	Insulin-like growth factor-binding protein 3 receptor	16.9953	18.8716	3.67132	18.1461	16.8416	18.0215	0.441382	18.383	22.9217	23.2426		117443	0.00544791			0.0123428
6317	YNISVINGTSPFAYDYDLTHIVAAYQER	Q9H6L2	TMEM231	Transmembrane protein 231	17.4475	16.8493	0.660578	18.658	18.1253	22.5163	0.0476626	22.8794	23.5819	1.62732		285930	0.0132636			0.278282
2465	ILGDKVNNTAVIEK	Q9H330	TMEM245	Transmembrane protein 245	17.5448	17.1201	0.744994	17.8014	18.0791	22.3497	0.0518109	17.7869	23.9438	71.3529		276918	0.0128456			0.247932
4234	NVTHLYSTILGHQIGLSGR	Q9NWD8	TMEM248	Transmembrane protein 248	21.6291	18.3705	0.104487	22.8446	21.4475	18.7309	6.57322	19.0284	23.058	16.3317		2.85983e+06	0.132661			0.0201821
5597	VFKPPSSTEALNDSQEFPFPETPTK	Q4ZIN3	TMEM259	Membralin	18.4675	18.346	0.919231	23.9767	18.0256	22.6712	0.0399517	18.3384	25.4523	138.515		266837	0.012378			0.309823
4780	SIYNWTEEYGR	Q9NX78	TMEM260	Transmembrane protein 260	16.3131	18.1272	3.5164	18.5281	17.8362	17.4226	1.33201	19.1379	20.5792	2.71565		234008	0.0108551			0.00814945
6365	YSLNVTYNYPVHYFDGR	Q9NV96	TMEM30A	Cell cycle control protein 50A	23.3868	23.725	1.26418	25.838	25.8135	25.9511	0.90903	22.9413	24.3958	2.74062		5.89709e+07	2.73553			3.00928
560	CLSPDVTPCFCTINFTLEK	Q9NV96	TMEM30A	Cell cycle control protein 50A	21.8125	18.3241	0.0891019	24.3665	23.2833	24.0058	0.606046	18.8612	18.6092	0.839731		1.02087e+07	0.47356			0.781392
4363	QGNYSAGLPR	Q3MIR4	TMEM30B	Cell cycle control protein 50B	21.7501	22.0662	1.24496	17.1545	17.8792	15.9868	3.71252	20.6966	20.765	1.04855		241088	0.0111835			0.00301238
5838	VNITYNYPVR	Q3MIR4	TMEM30B	Cell cycle control protein 50B	22.3962	22.7837	1.30812	18.5904	18.2825	17.094	2.27916	21.7333	22.5563	1.76908		318846	0.0147905			0.00648948
4581	RPVYELSPDPNNTGFINQDFVVWMR	Q3MIR4	TMEM30B	Cell cycle control protein 50B	23.9294	24.9861	2.08017	17.2196	18.2423	18.2533	0.992404	18.767	17.9387	0.563192		310084	0.0143841			0.0144942
1152	ELEYDYTGDPGTGNCSVCAAAGQGR	Q3MIR4	TMEM30B	Cell cycle control protein 50B	16.6954	23.7849	136.192	16.866	16.9342	17.2791	0.787363	22.0558	23.1883	2.19238		125228	0.00580905			0.00737786
1104	EHWQPQETNESLK	Q9Y2B1	TMEM5	Transmembrane protein 5	17.9363	17.7725	0.892671	19.2067	17.7573	19.0711	0.40226	17.9931	21.5126	11.4677		221554	0.0102774			0.0255491
4261	NYSSGTHNIEVIVQDSAGR	Q0P6H9	TMEM62	Transmembrane protein 62	17.3779	15.679	0.308021	18.1285	19.883	20.1336	0.840547	21.643	22.4054	1.69631		966895	0.0448521			0.0533606
4866	SNHTIWFGHFTTSTILSPSPGIR	Q0P6H9	TMEM62	Transmembrane protein 62	17.5835	17.6198	1.02548	18.8081	17.4358	18.6391	0.434281	16.6404	21.799	35.7185		177296	0.00822435			0.0189379
3461	LQNMTVDECFQSR	Q9P1W3	TMEM63C	Calcium permeable stress-gated cation channel 1	20.2019	20.085	0.922167	18.1529	17.8227	16.3318	2.81064	20.1435	21.1149	1.96074		231829	0.010754			0.00382617
735	DINGTLLSQATCELCDGNENSFMVVNALGDR	Q5HYA8	TMEM67	Meckelin	18.8199	17.3354	0.357372	16.4506	16.7121	18.2182	0.352062	17.166	23.7358	94.9963		107360	0.00498019			0.0141458
1396	FDGEPCDLSLNITWYLK	Q8NBN3	TMEM87A	Transmembrane protein 87A	20.5634	23.4292	7.2894	21.2005	19.9294	18.7415	2.27821	18.1846	22.4015	18.5957		998498	0.046318			0.0203309
4198	NTTIFLK	Q8NBN3	TMEM87A	Transmembrane protein 87A	24.2785	24.5153	1.17838	22.8111	22.6981	22.5008	1.14655	24.0937	25.167	2.10424		6.8047e+06	0.315654			0.275308
3038	LFQNCSELFK	Q8NBN3	TMEM87A	Transmembrane protein 87A	26.8457	27.3844	1.45266	26.2841	25.9116	25.762	1.10926	27.0529	28.2316	2.26373		6.31203e+07	2.928			2.6396
1219	ENGTNLTFIGDK	Q8NBN3	TMEM87A	Transmembrane protein 87A	25.8019	26.3734	1.48607	25.0817	24.9243	24.9636	0.973127	26.0305	26.2136	1.13532		3.18392e+07	1.47695			1.51773
4339	QEAKENGTNLTFIGDK	Q8NBN3	TMEM87A	Transmembrane protein 87A	17.7475	17.2315	0.699308	23.7547	16.3641	19.6813	0.100328	18.1408	25.5849	174.14		84350	0.0039128			0.039
2071	GWSCTDNSTAQTVAQQR	Q9HCN3	TMEM8A	Transmembrane protein 8A	16.9664	17.69	1.6513	18.4352	17.9343	17.4296	1.41883	19.1762	20.1381	1.94787		250474	0.0116189			0.00818908
636	DCVSNGSLGCPVR	Q9HCN3	TMEM8A	Transmembrane protein 8A	22.6684	23.0615	1.31321	19.5451	19.1793	19.1663	1.00905	21.8568	19.4187	0.184527		593669	0.027539			0.0272919
4863	SNASVNVSHPAPGDWFVAAHLPPSSQK	Q9HCN3	TMEM8A	Transmembrane protein 8A	18.248	21.869	12.3035	18.7917	18.7729	19.2229	0.732043	16.7512	22.1062	40.9275		447926	0.0207782			0.0283839
4996	SVTIQPLLQSSQNQSFNASSGLLSPSPDHQDLGR	Q9HCN3	TMEM8A	Transmembrane protein 8A	21.4027	22.4748	2.10249	17.3069	17.6425	18.6531	0.49634	17.6888	18.5273	1.78819		204608	0.00949128			0.0191225
3998	NISGHIYNQNVSQK	Q9P0T7	TMEM9	Transmembrane protein 9	21.7216	17.9329	0.0723582	18.5352	22.657	22.455	1.15029	22.287	18.291	0.0626735		6.61358e+06	0.306789			0.266705
2286	IDGPVISESTPIAETIMASSNESLVVNR	P42167	TMPO	Lamina-associated polypeptide 2, isoforms beta/gamma;Thymopoietin;Thymopentin	18.942	20.2361	2.45224	21.7876	16.3806	21.4306	0.0301855	17.3344	22.3486	32.3165		85320.2	0.00395781			0.131116
6325	YNSTIQESLHR	Q9BYE2	TMPRSS13	Transmembrane protease serine 13	18.6308	18.6453	1.0101	18.8552	17.4801	16.1131	2.57934	21.0467	22.6251	2.98638		182825	0.00848081			0.00328798
3387	LNTSAGNVDIYK	O15393	TMPRSS2	Transmembrane protease serine 2;Transmembrane protease serine 2 non-catalytic chain;Transmembrane protease serine 2 catalytic chain	20.6196	20.798	1.13163	17.2004	17.5473	17.3824	1.12109	19.9644	20.544	1.49443		191542	0.00888519			0.0079255
332	ANESRLEEADQLYR	Q6ZXV5	TMTC3	Transmembrane and TPR repeat-containing protein 3	18.0214	17.5829	0.737901	17.4668	16.5825	17.8379	0.418877	18.6136	20.1685	2.93813		98136.4	0.00455232			0.0108679
3607	LVALAVIDEKNTSVEHTR	Q96JJ7	TMX3	Protein disulfide-isomerase TMX3	19.3064	19.0694	0.848508	21.4552	20.6601	21.277	0.652071	19.0498	19.9442	1.85884		1.65695e+06	0.0768622			0.117874
5540	VEAAQNLTLPGSLR	P24821	TNC	Tenascin	16.5183	16.3655	0.899503	20.8469	20.1196	19.7284	1.31148	16.6321	17.8038	2.25277		1.13921e+06	0.0528453			0.0402943
3233	LLETVEYNISGAER	P24821	TNC	Tenascin	17.4749	18.5206	2.06437	20.3763	19.2146	19.0132	1.14981	18.9462	18.5375	0.753302		608374	0.0282211			0.0245441
571	CTEGVGYTNASNNLFACLPCTACK	O00220	TNFRSF10A	Tumor necrosis factor receptor superfamily member 10A	18.3889	18.9529	1.47836	16.9138	21.7534	17.807	15.4165	19.2518	20.7281	2.78234		3.5353e+06	0.163994			0.0106376
303	ALVAVVAGNSTTPR	Q9Y6Q6	TNFRSF11A	Tumor necrosis factor receptor superfamily member 11A	17.1859	17.6804	1.40883	19.3301	20.12	19.452	1.58887	17.6793	18.1947	1.42939		1.13952e+06	0.0528599			0.0332689
5794	VLSSIQEGTVPDNTSSAR	O75509	TNFRSF21	Tumor necrosis factor receptor superfamily member 21	19.2606	19.5997	1.26497	20.5906	20.6043	20.3564	1.18748	18.9488	17.7607	0.43888		1.59409e+06	0.0739461			0.0622716
4945	SSSQYIESFWQSSQSQNFTAHDK	Q5JTV8	TOR1AIP1	Torsin-1A-interacting protein 1	16.9889	23.7889	111.43	19.0047	23.8776	16.0118	233.261	23.4879	19.0442	0.0459529		1.54125e+07	0.714952			0.00306503
1047	EERPLNASALK	O14657	TOR1B	Torsin-1B	17.2994	22.476	36.1669	22.4968	16.964	21.9818	0.0308668	23.3233	24.2999	1.96782		127842	0.00593029			0.192125
5009	SWVQGNLTACGR	Q8N2E6	TOR2A	Prosalusin;Salusin-alpha;Salusin-beta;Torsin-2A	22.6769	23.1835	1.4207	21.9704	21.5189	21.4157	1.07415	24.332	25.6676	2.5238		3.00493e+06	0.139392			0.129769
1664	FVLQNASR	Q9NXH8	TOR4A	Torsin-4A	17.6965	17.2255	0.721464	23.2246	21.4167	21.9946	0.669938	16.7072	18.9891	4.86318		2.79943e+06	0.129859			0.193837
5757	VLHNGTLAELQGLPHIR	Q13641	TPBG	Trophoblast glycoprotein	27.5184	28.349	1.77842	25.6735	25.0244	24.6458	1.30008	26.6798	27.9607	2.42991		3.41268e+07	1.58306			1.21767
4576	RPPLAELAALNLSGSR	Q13641	TPBG	Trophoblast glycoprotein	27.2013	27.6626	1.37678	25.5572	25.1334	24.843	1.22298	26.2347	27.205	1.95925		3.6805e+07	1.7073			1.39602
4082	NLTHLESLHLEDNALK	Q13641	TPBG	Trophoblast glycoprotein	27.0509	28.5087	2.74689	25.9328	25.6967	25.5922	1.07512	26.7161	28.2967	2.99094		5.43848e+07	2.52279			2.34651
4079	NLTEVPTDLPAYVR	Q13641	TPBG	Trophoblast glycoprotein	28.3103	29.263	1.93549	25.9161	25.7002	25.806	0.929289	27.1904	28.3864	2.29104		5.45169e+07	2.52891			2.72134
2168	HLDLSNNSLVSLTYVSFR	Q13641	TPBG	Trophoblast glycoprotein	24.2832	24.9957	1.63864	22.9169	21.7684	22.2173	0.732601	23.7906	24.6526	1.81756		3.57225e+06	0.165708			0.226192
4299	PPLAELAALNLSGSR	Q13641	TPBG	Trophoblast glycoprotein	17.1888	20.894	13.043	19.593	17.8396	19.0479	0.432778	19.5001	16.9741	0.173619		234560	0.0108807			0.0251416
151	AGIEASLDVQYLMSAGANISTWVYSSPGR	O14773	TPP1	Tripeptidyl-peptidase 1	18.1292	18.3741	1.18501	17.7348	18.9692	18.5992	1.29235	25.1981	24.9673	0.852162		513214	0.0238068			0.0184213
1540	FLSSSPHLPPSSYFNASGR	O14773	TPP1	Tripeptidyl-peptidase 1	24.4392	24.7787	1.26532	24.7997	24.7219	24.4083	1.24281	25.857	26.9679	2.1598		2.76715e+07	1.28362			1.03284
6320	YNLTSQDVGSGTSNNSQACAQFLEQYFHDSDLAQFMR	O14773	TPP1	Tripeptidyl-peptidase 1	25.2192	18.7764	0.0114954	25.6522	25.037	25.3579	0.80057	16.9851	28.9549	4011.15		3.44261e+07	1.59695			1.99476
1477	FILCNLTVEAVGADSASVR	Q7L0X0	TRIL	TLR4 interactor with leucine rich repeats	17.212	18.6019	2.62061	17.4415	17.7652	15.8662	3.72955	17.0717	21.5054	21.6111		222771	0.0103338			0.0027708
1533	FLNLSANELQPSLR	Q7L0X0	TRIL	TLR4 interactor with leucine rich repeats	17.3417	17.797	1.37107	17.7009	17.9939	17.7222	1.20723	21.0739	22.7692	3.23844		261038	0.012109			0.0100304
1725	GCLSNFSSYLTK	O60858	TRIM13	E3 ubiquitin-protein ligase TRIM13	17.038	19.0729	4.09794	18.3332	18.2008	18.3997	0.871215	18.9461	20.3902	2.72093		301291	0.0139762			0.0160422
958	DYGSQEDFTQVWNTTMK	O60635	TSPAN1	Tetraspanin-1	17.2014	21.8833	25.668	18.9092	19.7284	18.9175	1.75431	20.7297	21.3599	1.54778		868641	0.0402943			0.0229688
522	CCGFTNYTDFEDSPYFK	O60635	TSPAN1	Tetraspanin-1	21.3087	21.958	1.56841	19.7899	19.7446	19.3816	1.2861	21.0616	18.5344	0.173475		878450	0.0407493			0.0316844
4197	NTTEVVNTMCGYK	O95858	TSPAN15	Tetraspanin-15	16.898	23.2721	82.946	19.8316	18.9861	19.6006	0.653156	18.8463	23.0547	18.4865		519261	0.0240873			0.0368783
4146	NQSVPLSCCR	O60637	TSPAN3	Tetraspanin-3	15.8936	21.3178	42.9385	21.6457	20.233	18.8446	2.61788	20.7533	20.8005	1.03326		1.23237e+06	0.0571667			0.021837
4394	QLHCCGIHNYSDWENTDWFK	O60637	TSPAN3	Tetraspanin-3	20.6565	21.7304	2.10512	18.623	16.964	17.6094	0.639316	17.9226	23.3663	43.5228		127842	0.00593029			0.009276
4456	QTDVINASWWVMSNK	Q12999	TSPAN31	Tetraspanin-31	24.0479	24.787	1.66913	21.8053	17.3837	21.9342	0.042674	24.4	25.4539	2.07613		171007	0.00793265			0.18589
523	CCGVSNYTDWFEVYNATR	O14817	TSPAN4	Tetraspanin-4	21.2285	21.7598	1.44523	23.683	23.1666	23.2128	0.968484	22.7076	22.9186	1.15749		9.41546e+06	0.436762			0.450975
2688	IVNETLYENTK	P19075	TSPAN8	Tetraspanin-8	18.6295	17.0281	0.329557	23.9237	23.5688	23.3151	1.19226	17.9344	19.0895	2.227		1.24427e+07	0.57719			0.484114
3869	NATTPLWR	O75954	TSPAN9	Tetraspanin-9	20.7691	20.699	0.952572	22.7431	22.3113	22.6225	0.805971	20.4209	21.6712	2.37891		5.2044e+06	0.24142			0.299539
471	AVGNSTFAIACLQR	Q96AE7	TTC17	Tetratricopeptide repeat protein 17	21.9525	17.9183	0.0610358	23.1616	22.3291	22.077	1.19094	23.837	25.3735	2.9009		5.26901e+06	0.244417			0.205231
5843	VNLSAPLLPK	Q96AE7	TTC17	Tetratricopeptide repeat protein 17	21.4636	22.045	1.4963	22.7215	22.3804	22.1722	1.15525	23.513	25.3874	3.66649		5.45974e+06	0.253265			0.21923
3997	NISGALEAFR	Q96AE7	TTC17	Tetratricopeptide repeat protein 17	20.5251	20.6663	1.10282	22.0832	21.1677	21.2368	0.953232	21.9661	23.3147	2.54665		2.35566e+06	0.109274			0.114635
6044	VWDTAVGLNHTAEPSLQTLER	Q9C0H2	TTYH3	Protein tweety homolog 3	24.6169	15.897	0.00237164	24.2238	23.7195	23.7448	0.982616	19.4026	23.5374	17.567		1.38128e+07	0.640743			0.652079
5885	VQEVLNGTEVNLQHLTALVDCR	Q9C0H2	TTYH3	Protein tweety homolog 3	22.8074	23.7195	1.88178	22.7024	21.8978	21.9756	0.947501	18.7049	21.9984	9.80488		3.90746e+06	0.181258			0.191301
459	AVCMLSNTTAIAEAWAR	P68363	TUBA1B;TUBA4A;TUBA1A;TUBA3C;TUBA3E	Tubulin alpha-1B chain;Tubulin alpha-4A chain;Tubulin alpha-1A chain;Tubulin alpha-3C/D chain;Tubulin alpha-3E chain	25.3698	18.4594	0.00831309	24.7668	23.7409	24.7217	0.506699	25.9968	23.6695	0.199257		1.40192e+07	0.650318			1.28344
460	AVCMLSNTTAVAEAWAR	Q9BQE3	TUBA1C	Tubulin alpha-1C chain	22.8685	19.8896	0.126842	23.4322	22.7195	23.3115	0.663423	23.3374	19.6291	0.0765051		6.90639e+06	0.320372			0.482907
3738	MAVTFIGNSTAIQELFKR	P07437	TUBB	Tubulin beta chain	22.6796	16.9846	0.0193034	23.6649	22.5743	22.8283	0.838568	20.9974	18.1647	0.140369		6.24513e+06	0.289697			0.345467
4169	NSSYFVEWIPNNVK	P07437	TUBB;TUBB6;TUBB4B;TUBB2B;TUBB4A;TUBB2A;TUBB3	Tubulin beta chain;Tubulin beta-6 chain;Tubulin beta-4B chain;Tubulin beta-2B chain;Tubulin beta-4A chain;Tubulin beta-2A chain;Tubulin beta-3 chain	23.1277	20.4858	0.160217	23.1328	22.4688	22.6785	0.864717	22.7412	21.334	0.377043		5.80474e+06	0.269269			0.311395
4258	NYSMIVMFTALQPQR	Q13454	TUSC3	Tumor suppressor candidate 3	20.6376	20.3188	0.801736	18.769	20.1087	19.863	1.18567	21.218	22.9167	3.24608		1.13063e+06	0.0524475			0.0442346
6278	YLFPEVDMTSTNFTGLSCR	Q6PKC3	TXNDC11	Thioredoxin domain-containing protein 11	20.105	16.4761	0.0808337	18.5518	18.7408	18.2397	1.41529	20.4091	20.7229	1.24298		438069	0.020321			0.0143582
1317	EVLNYTAENICK	Q6PKC3	TXNDC11	Thioredoxin domain-containing protein 11	22.1307	17.3574	0.0365674	18.2335	17.7216	17.5004	1.1657	18.3489	22.9968	25.0702		216139	0.0100262			0.00860099
2125	HFNTSLVFPR	Q6PKC3	TXNDC11	Thioredoxin domain-containing protein 11	20.976	21.2812	1.23559	19.1715	18.5931	18.8161	0.856782	21.0083	21.976	1.95572		395440	0.0183436			0.0214098
2338	IFIFNQTGIEAK	Q96J42	TXNDC15	Thioredoxin domain-containing protein 15	23.635	24.0866	1.36756	24.7965	24.5475	24.0812	1.38156	23.8404	25.4533	3.05866		2.45208e+07	1.13746			0.823316
4007	NITGLENFTLK	Q96J42	TXNDC15	Thioredoxin domain-containing protein 15	23.92	24.4446	1.43853	24.9761	24.2834	24.2429	1.02847	24.1882	25.462	2.41798		2.04189e+07	0.947185			0.920965
4428	QNVTEFPIIK	Q9P2K2	TXNDC16	Thioredoxin domain-containing protein 16	19.5051	20.2952	1.72919	20.7412	20.416	20.2715	1.10535	22.5796	24.0794	2.82804		1.39903e+06	0.064898			0.0587128
816	DLVPATNYSLR	Q06418	TYRO3	Tyrosine-protein kinase receptor TYRO3	19.9662	20.6969	1.65944	20.2767	20.1755	19.791	1.30541	18.2851	22.0684	13.7685		1.18422e+06	0.054933			0.0420811
2019	GTEVNTTVIGENDPIDEVQGFLFGK	Q9NYU2	UGGT1	UDP-glucose:glycoprotein glucosyltransferase 1	23.5142	26.0049	5.62051	19.0044	22.9903	17.8581	35.0708	18.2577	18.5891	1.25823		8.3324e+06	0.386521			0.0110211
2355	IGFIFVVNDSEDVDGMQDAGVAVLR	Q9NYU2	UGGT1	UDP-glucose:glycoprotein glucosyltransferase 1	17.1862	23.8299	99.9892	17.3427	19.4999	18.6753	1.77104	17.5715	18.6641	2.13258		741404	0.034392			0.0194191
833	DNLTAFQK	Q9NYU1	UGGT2	UDP-glucose:glycoprotein glucosyltransferase 2	16.388	18.5598	4.50585	16.5366	16.8832	18.5236	0.320768	19.0864	20.0626	1.96728		120879	0.00560728			0.0174808
3396	LNVTTAWK	Q9BZM5	ULBP2;RAET1G	NKG2D ligand 2;Retinoic acid early transcript 1G protein	22.7156	22.7246	1.00626	22.6369	22.6588	22.4604	1.14743	20.4465	21.0601	1.53007		6.62184e+06	0.307172			0.267705
4004	NISTAEQPYLFTR	Q9Y2C2	UST	Uronyl 2-sulfotransferase	18.8522	19.5443	1.61563	18.2297	16.6985	19.0532	0.195508	21.6488	22.6277	1.97096		106353	0.00493347			0.0252341
3115	LHEITNETFR	Q6EMK4	VASN	Vasorin	18.9588	18.879	0.946189	17.4523	18.443	18.1434	1.2308	18.5853	19.3713	1.72429		356366	0.016531			0.0134311
4677	SEGTNSTLTLSPVSFENEHSYLCTVTCGHK	P19320	VCAM1	Vascular cell adhesion protein 1	17.3697	18.1733	1.74545	21.4617	20.2548	18.6427	3.05696	17.3747	19.0753	3.25036		1.25113e+06	0.058037			0.0189852
4328	QCLEEAQLENETIGCSK	P32241	VIPR1	Vasoactive intestinal polypeptide receptor 1	19.1792	16.5745	0.164402	20.7501	19.6262	19.2371	1.30958	20.1946	21.777	2.99468		809235	0.0375386			0.0286647
3847	MWDNLTCWPATPR	P32241	VIPR1	Vasoactive intestinal polypeptide receptor 1	20.4118	20.7739	1.2853	21.2133	20.685	20.4988	1.13776	21.6307	22.6333	2.00361		1.6858e+06	0.0782003			0.0687316
5064	TCFTGGNVTLTCQVSGAYPPAK	Q8N0Z9	VSIG10	V-set and immunoglobulin domain-containing protein 10	17.5236	18.1005	1.49164	19.7014	17.7997	17.0925	1.63263	17.2497	22.2145	31.2287		228162	0.0105839			0.00648273
4122	NNSEPVFLLSSNSSLRPAEPR	Q8N0Z9	VSIG10	V-set and immunoglobulin domain-containing protein 10	24.4111	24.8854	1.38924	23.8713	17.8637	17.2642	1.51519	24.0535	25.6881	3.10501		238512	0.011064			0.00730205
4121	NNSEPVFLLSSNSSLR	Q8N0Z9	VSIG10	V-set and immunoglobulin domain-containing protein 10	18.2397	21.642	10.5729	19.3892	19.3857	19.1473	1.17968	20.6894	19.7629	0.526133		684979	0.0317746			0.0269349
4088	NLTQPEVIIQPSSR	Q8N0Z9	VSIG10	V-set and immunoglobulin domain-containing protein 10	23.8079	24.6827	1.83375	21.9905	21.8863	21.8435	1.03011	23.3717	24.527	2.22731		3.87644e+06	0.179819			0.174563
2175	HLITQDGQNSTLTIHNCSQDLDEGYYICR	Q8N0Z9	VSIG10	V-set and immunoglobulin domain-containing protein 10	24.0611	25.43	2.58274	23.2754	22.8816	23.2718	0.763024	24.1606	25.0241	1.81945		7.72766e+06	0.358468			0.4698
1668	FVTAGSNVTLR	Q86VR7	VSIG10L	V-set and immunoglobulin domain-containing protein 10-like	17.6606	17.5269	0.911491	17.535	17.4136	17.7425	0.796143	22.2146	23.0484	1.78237		174589	0.00809877			0.0101725
5061	TAVFADQVIVGNASLR	Q7Z7D3	VTCN1	V-set domain-containing T-cell activation inhibitor 1	17.7378	19.3501	3.05739	17.9684	16.5932	18.1593	0.33772	22.4334	23.9964	2.95468		98866.9	0.00458621			0.0135799
420	ASSGNGSEEAWGALR	Q96G27	WBP1	WW domain-binding protein 1	18.0285	19.7221	3.23463	17.1701	18.1449	17.1609	1.97794	17.2327	19.969	6.66359		289841	0.013445			0.00679749
3169	LILISTNGSFIR	Q6UXN9	WDR82	WD repeat-containing protein 82	19.5742	18.2526	0.400091	20.0181	18.2043	20.0934	0.269975	19.9299	18.2829	0.319303		302023	0.0140102			0.0518942
561	CLYGEAYPACSPGNTSTAEEELCR	O76024	WFS1	Wolframin	21.8304	22.547	1.6433	21.9587	21.7978	18.9258	7.32079	23.0317	24.5785	2.92168		3.64579e+06	0.16912			0.0231013
6069	VYNSTLTWQQYGALCGPR	O76024	WFS1	Wolframin	24.2075	24.5209	1.24263	23.1024	23.5753	23.6273	0.964598	23.4674	26.1129	6.25713		1.24989e+07	0.579796			0.601075
6322	YNQSISLR	Q9UBH6	XPR1	Xenotropic and polytropic retrovirus receptor 1	17.4577	17.6183	1.11775	17.2153	19.4335	19.2188	1.16046	18.5279	18.3055	0.857138		708054	0.032845			0.0283034
3421	LPTTVLNATAK	Q9GZM5	YIPF3	Protein YIPF3;Protein YIPF3, 36 kDa form III	18.8249	19.6585	1.78213	20.9065	20.6217	18.3527	4.81989	19.2998	20.4019	2.14667		1.61343e+06	0.0748433			0.015528
213	AITDGQAGFGNDTLSK	Q7Z739	YTHDF3	YTH domain-containing family protein 3	16.9698	20.1924	9.33468	19.0186	16.0624	15.6358	1.34406	18.1112	18.4203	1.23893		68432.8	0.00317444			0.00236183
1521	FLIPNASQAESK	P63104	YWHAZ	14-3-3 protein zeta/delta	24.798	18.048	0.00929068	24.4166	23.7842	24.4618	0.625204	24.3643	21.5751	0.144666		1.44463e+07	0.670132			1.07186
4086	NLTNLASNVK	Q96DT7	ZBTB10	Zinc finger and BTB domain-containing protein 10	19.1117	19.7561	1.56309	18.4774	18.15	18.8429	0.618609	19.2054	18.6036	0.658931		290867	0.0134927	0.413507	0.419872	0.0218113	0.0728149
																#VALUE!			#VALUE!

## Sheet: significanct_peptide
* "O" means that over 2 or under 0.5 fold change ratio ^ "↑" or "↓" means deamidation peptides were up or down regulate after treatment of analog in three cell lines consistently
id	Sequence	Accession	Gene name	Protein name	Fold change ratio MCF N/C	Fold change ratio MDA N/C	Fold change ratio T47D N/C	* significance MCF	significance MDA	significance T47D	^ Up/down
13	AAENFTLLVK	Q99571	P2RX4	P2X purinoceptor 4	1.91057	14.0612	2.36543	-	O	O	↑
18	AAIPSALDTNSSK	Q08380	LGALS3BP	Galectin-3-binding protein	1.23885	0.966305	1.22264	-	-	-	-
21	AALSNASLLAEACHQIFEGK	Q8N0V5	GCNT2	N-acetyllactosaminide beta-1,6-N-acetylglucosaminyl-transferase, isoform A	2.10716	4.29259	1.58942	O	O	-	↑
25	AANYTSSLNLPDK	Q92854	SEMA4D	Semaphorin-4D	2.36608	0.866217	1.28085	O	-	-	-
26	AAPAPQEATATFNSTADR	P13598	ICAM2	Intercellular adhesion molecule 2	0.818015	1.07155	4.29929	-	-	O	-
27	AAPAPQEATATFNSTADREDGHR	P13598	ICAM2	Intercellular adhesion molecule 2	9.52355	5.17318	1.08035	O	O	-	↑
33	AASNFTEIK	Q92673	SORL1	Sortilin-related receptor	4.93175	0.76953	0.365844	O	-	O	-
41	AAVHQINFTVGQTSEWIHGIQR	Q6AZY7	SCARA3	Scavenger receptor class A member 3	1.11242	1.80325	25.8932	-	-	O	↑
52	ACVAGFTNITFHPQNK	Q12913	PTPRJ	Receptor-type tyrosine-protein phosphatase eta	32.3008	43.4083	1.95247	O	O	-	↑
83	AEAVGETLTLPGLVSADNGTYTCEASNK	Q8NFZ8	CADM4	Cell adhesion molecule 4	1.43883	14.7256	78.7659	-	O	O	↑
90	AEKENTSSWYEVDSFTPFR	P17181	IFNAR1	Interferon alpha/beta receptor 1	0.207992	0.590251	10.883	O	-	O	-
98	AENQTAPGEVPALSNLRPPSR	P28300	LOX	Protein-lysine 6-oxidase	0.457359	1.15465	0.880076	O	-	-	-
101	AEPGTHLCIDVEDAMNITR	Q86WC4	OSTM1	Osteopetrosis-associated transmembrane protein 1	90.0841	1.15773	2.16895	O	-	O	↑
102	AEPPLNASASDQGEK	Q9Y4L1	HYOU1	Hypoxia up-regulated protein 1	1.62203	1.18995	2.28232	-	-	O	↑
112	AEYNITITVTDLGTPR	Q9Y5E1	PCDHB9;PCDHB10;PCDHB12;PCDHB6	Protocadherin beta-9;Protocadherin beta-10;Protocadherin beta-12;Protocadherin beta-6	1.13501	0.154513	0.581117	-	O	-	-
113	AEYNVTITVTDLGTPR	Q9UN66	PCDHB8	Protocadherin beta-8	3.36498	0.529958	2.06666	O	-	O	-
114	AFALNCSWR	F2Z333	C1orf233	Fibronectin type-III domain-containing transmembrane protein C1orf233	1.40815	1.76247	1.41098	-	-	-	↑
135	AFNSTLPTMAQMEK	P16070	CD44	CD44 antigen	1.52436	1.13375	7.85548	-	-	O	↑
140	AFSTLLVNVSGK	Q96T83	SLC9A7	Sodium/hydrogen exchanger 7	1.3616	0.62449	2.07801	-	-	O	-
149	AGFEAVENGTVCR	P29323	EPHB2	Ephrin type-B receptor 2	1.15333	0.8631	2.04429	-	-	O	-
151	AGIEASLDVQYLMSAGANISTWVYSSPGR	O14773	TPP1	Tripeptidyl-peptidase 1	1.18501	2.06967	0.852162	-	O	-	-
155	AGKPSAAAASVSTQHGSILQLNDTLEEK	Q68CP4	HGSNAT	Heparan-alpha-glucosaminide N-acetyltransferase	2.49009	0.769877	5.32839	O	-	O	-
163	AGPNGTLFVADAYK	Q9HDC9	APMAP	Adipocyte plasma membrane-associated protein	1.47703	0.977047	2.12653	-	-	O	-
175	AGYFNFTSATITYLAQEDGPVVIGSTSAPGQGGILAQR	P43308	SSR2	Translocon-associated protein subunit beta	6.24802	0.689131	1.62349	O	-	-	-
176	AHCVWLECPIPDAPVVTNVTVK	P26006	ITGA3	Integrin alpha-3;Integrin alpha-3 heavy chain;Integrin alpha-3 light chain	1.78633	0.68146	2.65332	-	-	O	-
177	AHGDPVALNYTFYQVISASSQTPLALR	P52849	NDST2	Bifunctional heparan sulfate N-deacetylase/N-sulfotransferase 2;Heparan sulfate N-deacetylase 2;Heparan sulfate N-sulfotransferase 2	2.13954	0.635053	21.0027	O	-	O	-
205	AINLTWTKPFDGNSPLIR	Q58EX2	SDK2	Protein sidekick-2	0.534699	0.840722	0.0901705	-	-	O	↓
207	AINQTAVECTWTGPR	Q92673	SORL1	Sortilin-related receptor	2.06465	0.0477088	0.177871	O	O	O	-
213	AITDGQAGFGNDTLSK	Q7Z739	YTHDF3	YTH domain-containing family protein 3	9.33468	0.111144	1.23893	O	O	-	-
233	ALAGLVYNASGSEHCYDIYR	Q9UHL4	DPP7	Dipeptidyl peptidase 2	1.90951	0.64986	2.26891	-	-	O	-
234	ALANFTATSSK	P16471	PRLR	Prolactin receptor	0.715587	0.956476	2.22823	-	-	O	-
236	ALAYGEKNLTFEGPLPEKIELLAHK	Q9HAT2	SIAE	Sialate O-acetylesterase	1.43883	0.963896	0.730978	-	-	-	-
240	ALDPAGNESAYPPNGVECYSCVGLSR	O95274	LYPD3	Ly6/PLAUR domain-containing protein 3	5.44639	1.45917	3.70712	O	-	O	↑
241	ALDRDEVGNSSHVSFQGPLGPDANFTVQDNR	Q86UP0	CDH24	Cadherin-24	11.2161	0.477658	1.2479	O	O	-	-
256	ALEVNMSLSGR	Q9UBS9	SUCO	SUN domain-containing ossification factor	1.93831	5.43752	5.11736	-	O	O	↑
259	ALGFENATQALGR	Q08380	LGALS3BP	Galectin-3-binding protein	1.31951	1.0041	1.48627	-	-	-	↑
261	ALGQAANESHNGSILPISWR	Q9NQ25	SLAMF7	SLAM family member 7	0.838278	1.13784	0.308534	-	-	O	-
263	ALHALNVTWR	Q9Y2E5	MAN2B2	Epididymis-specific alpha-mannosidase	0.625204	0.56103	3.65305	-	-	O	-
281	ALLTNVSSVALGSR	Q7Z7M0	MEGF8	Multiple epidermal growth factor-like domains protein 8	0.907142	0.483085	1.91946	-	O	-	-
286	ALMVLTEEPLLYIPPPPCQPLINTTESLR	P18850	ATF6	Cyclic AMP-dependent transcription factor ATF-6 alpha;Processed cyclic AMP-dependent transcription factor ATF-6 alpha	3.11666	0.736777	43.6164	O	-	O	-
299	ALSNISLR	O15031	PLXNB2	Plexin-B2	1.42731	0.111712	2.15517	-	O	O	-
300	ALSPNSTISSAPK	Q9UH99	SUN2	SUN domain-containing protein 2	1.54928	1.32717	2.05409	-	-	O	↑
303	ALVAVVAGNSTTPR	Q9Y6Q6	TNFRSF11A	Tumor necrosis factor receptor superfamily member 11A	1.40883	1.37164	1.42939	-	-	-	↑
305	ALVCSQPGLNCTVK	Q96F46	IL17RA	Interleukin-17 receptor A	1.25093	0.0528483	2.06322	-	O	O	-
314	ALYELAGGTNFSDTVQADPQTVTR	Q92542	NCSTN	Nicastrin	36.5703	0.255616	2.02609	O	O	O	-
321	AMNTSQVEALGIQMLPGYR	Q8NBJ5	COLGALT1	Procollagen galactosyltransferase 1	0.879893	1.3339	2.36362	-	-	O	-
324	AMYVNLTLTGEPIR	Q96PQ0	SORCS2	VPS10 domain-containing receptor SorCS2	17.2533	1.07561	0.573713	O	-	-	-
328	ANDSDQGANAEIEYTFHQAPEVVR	Q08174	PCDH1	Protocadherin-1	3.98036	4.10647	1.60781	O	O	-	↑
332	ANESRLEEADQLYR	Q6ZXV5	TMTC3	Transmembrane and TPR repeat-containing protein 3	0.737901	0.837058	2.93813	-	-	O	-
333	ANFTIYDCSR	Q9Y4D7	PLXND1	Plexin-D1	1.31731	3.60325	3.48413	-	O	O	↑
334	ANGTGYFYVLAPK	Q8TE58	ADAMTS15	A disintegrin and metalloproteinase with thrombospondin motifs 15	1.17911	1.33362	5.9678	-	-	O	↑
335	ANHSLDVSFYFR	P78357	CNTNAP1	Contactin-associated protein 1	0.398486	0.436378	1.39891	O	O	-	-
338	ANISSPGLIYTYTQDPTVTR	P51805	PLXNA3	Plexin-A3	2.34161	0.987772	6.01056	O	-	O	-
341	ANLSGGVWK	P08581	MET	Hepatocyte growth factor receptor	3.59029	0.993299	1.12521	O	-	-	-
342	ANLTSMLIQR	P49641	MAN2A2	Alpha-mannosidase 2x	2.01838	1.02933	0.900439	O	-	-	-
343	ANLTVVLLR	P05362	ICAM1	Intercellular adhesion molecule 1	1.38578	0.873906	1.1042	-	-	-	-
344	ANLTWSVK	O00754	MAN2B1	Lysosomal alpha-mannosidase;Lysosomal alpha-mannosidase A peptide;Lysosomal alpha-mannosidase B peptide;Lysosomal alpha-mannosidase C peptide;Lysosomal alpha-mannosidase D peptide;Lysosomal alpha-mannosidase E peptide	1.39214	0.796143	2.05951	-	-	O	-
345	ANNSWFQSILR	Q92542	NCSTN	Nicastrin	0.688868	0.929515	34.1805	-	-	O	-
347	ANQSWEDSNTDLVPAPAVR	Q99988	GDF15	Growth/differentiation factor 15	0.930063	2.52345	0.409888	-	O	O	-
349	ANSTSDSVFTETPSPVLK	Q9UKI2	CDC42EP3	Cdc42 effector protein 3	0.813266	0.482935	5.27328	-	O	O	-
350	ANTSALAVPSPVSNSASAR	P55268	LAMB2	Laminin subunit beta-2	1.03591	2.23179	1.02918	-	O	-	↑
351	ANTSLPFPK	Q7Z7M9	GALNT5	Polypeptide N-acetylgalactosaminyltransferase 5	0.922167	0.837377	1.39194	-	-	-	-
352	ANTTQPGIVEGGQVLK	P06756	ITGAV	Integrin alpha-V;Integrin alpha-V heavy chain;Integrin alpha-V light chain	1.29594	0.442654	2.46246	-	O	O	-
355	ANYTGQIVLYSVNENGNITVIQAHR	P17301	ITGA2	Integrin alpha-2	1.58414	0.758936	2.0558	-	-	O	-
358	APDSNCSNLLITTR	A2RU67	KIAA1467	Uncharacterized protein KIAA1467	1.61642	0.626332	4.59256	-	-	O	-
359	APDTANLTTAALFR	Q9NS84	CHST7	Carbohydrate sulfotransferase 7	1.1805	1.06201	2.11741	-	-	O	↑
364	APGGDPCQPLVPPLSWENVTVDK	Q8NAC3	IL17RC	Interleukin-17 receptor C	1.62496	0.238664	1.58942	-	O	-	-
370	APPRNYSVIVMFTALQLHR	Q9H0U3	MAGT1	Magnesium transporter protein 1	1.49661	0.352098	1.87957	-	O	-	-
377	AQAGLEEALLAPGFGNASGNASER	P30989	NTSR1	Neurotensin receptor type 1	0.30378	1.23765	3.04871	O	-	O	-
383	AQGLVLEASNGSVLINGQR	Q9HC84	MUC5B	Mucin-5B	4.36838	0.724597	1.71012	O	-	-	-
389	AQLLQGLGFNLTER	P08185	SERPINA6	Corticosteroid-binding globulin	4.19508	0.641379	1.69091	O	-	-	-
391	AQQLLANSTALEEAMLQEQQR	O15230	LAMA5	Laminin subunit alpha-5	1.48937	1.79552	2.04302	-	-	O	↑
393	AQTLAMNVTNFWK	Q29980	MICB	MHC class I polypeptide-related sequence B	1.17397	2.14169	3.30901	-	O	O	↑
399	ARLNWTSLLPASFTK	Q6PIU2	NCEH1	Neutral cholesterol ester hydrolase 1	0.992611	0.254546	1.31148	-	O	-	-
405	ASGFYPWNITLSWR	Q29983	MICA	MHC class I polypeptide-related sequence A	1.65302	0.676776	2.48509	-	-	O	-
420	ASSGNGSEEAWGALR	Q96G27	WBP1	WW domain-binding protein 1	3.23463	1.39745	6.66359	O	-	O	↑
441	ATNSTATPSSTLGTTR	Q9HC84	MUC5B	Mucin-5B	1.52256	1.4614	0.541225	-	-	-	-
445	ATTLGVSSDSPGTTTLAQQVSGPVNTTVAR	O00592	PODXL	Podocalyxin	3.75002	0.0203201	4.40335	O	O	O	-
447	ATVFANGSLLLTQVR	Q13308	PTK7	Inactive tyrosine-protein kinase 7	2.68719	1.02569	0.5508	O	-	-	-
448	ATVFANGSLLLTQVRPR	Q13308	PTK7	Inactive tyrosine-protein kinase 7	16.6875	0.629662	2.56134	O	-	O	-
452	ATVSINDSVSDLPK	Q5SZK8	FREM2	FRAS1-related extracellular matrix protein 2	1.93536	0.903252	2.64524	-	-	O	-
454	ATYGEYSTGYIDNVTLISAR	Q13753	LAMC2	Laminin subunit gamma-2	26.4868	0.212201	3.46439	O	O	O	-
459	AVCMLSNTTAIAEAWAR	P68363	TUBA1B;TUBA4A;TUBA1A;TUBA3C;TUBA3E	Tubulin alpha-1B chain;Tubulin alpha-4A chain;Tubulin alpha-1A chain;Tubulin alpha-3C/D chain;Tubulin alpha-3E chain	0.00831309	0.68992	0.199257	O	-	O	↓
460	AVCMLSNTTAVAEAWAR	Q9BQE3	TUBA1C	Tubulin alpha-1C chain	0.126842	0.749136	0.0765051	O	-	O	↓
471	AVGNSTFAIACLQR	Q96AE7	TTC17	Tetratricopeptide repeat protein 17	0.0610358	0.514574	2.9009	O	-	O	-
483	AVLVNGTECLLAR	Q04912	MST1R	Macrophage-stimulating protein receptor;Macrophage-stimulating protein receptor alpha chain;Macrophage-stimulating protein receptor beta chain	1.49723	0.819122	2.97605	-	-	O	-
490	AVSSFDPEIDLSNQSGR	P28827	PTPRM	Receptor-type tyrosine-protein phosphatase mu	0.363443	0.989691	3.36242	O	-	O	-
501	AWSWAWPTNHTGALAR	O95158	NXPH4	Neurexophilin-4	1.26576	1.79957	1.90845	-	-	-	↑
508	AYLLPAPPAPGNASESEEDR	P17936	IGFBP3	Insulin-like growth factor-binding protein 3	1.36443	2.3651	5.29012	-	O	O	↑
517	CAPVNISCYAK	Q8WWI5	SLC44A1	Choline transporter-like protein 1	1.47652	0.769424	2.2708	-	-	O	-
518	CAQLTVNLTR	P54760	EPHB4	Ephrin type-B receptor 4	1.4209	0.720465	0.757491	-	-	-	-
519	CATVTENATGDLATSR	O43291	SPINT2	Kunitz-type protease inhibitor 2	1.28218	1.45735	2.16835	-	-	O	↑
521	CCGAANYTDWEK	P08962	CD63	CD63 antigen	1.18148	0.52239	1.48566	-	-	-	-
522	CCGFTNYTDFEDSPYFK	O60635	TSPAN1	Tetraspanin-1	1.56841	0.854528	0.173475	-	-	O	-
523	CCGVSNYTDWFEVYNATR	O14817	TSPAN4	Tetraspanin-4	1.44523	0.710398	1.15749	-	-	-	-
524	CCGWVSFYNWTDNAELMNRPEVTYPCSCEVK	P27701	CD82	CD82 antigen	0.844811	6.10546	3.36359	-	O	O	-
537	CGALQGLYTTVDFGTGSNITDAFLSQR	P16278	GLB1	Beta-galactosidase	33.3081	0.0294059	1.46917	O	O	-	-
538	CGLSQSQGNLSHVDWFSVHK	P43121	MCAM	Cell surface glycoprotein MUC18	2.17377	0.129359	1.59262	O	O	-	-
543	CIPVMEAQEYIANVTSSSSAK	Q8NC56	LEMD2	LEM domain-containing protein 2	0.114721	1.07893	153.66	O	-	O	-
544	CISIENTTVILEDCDGSK	Q7Z7M9	GALNT5	Polypeptide N-acetylgalactosaminyltransferase 5	0.677832	0.562997	3.25668	-	-	O	-
547	CLALNVSLR	Q9H9S5	FKRP	Fukutin-related protein	4.21403	0.800765	3.18479	O	-	O	-
556	CLHNGTCVDLVGGFR	Q9UM47	NOTCH3	Neurogenic locus notch homolog protein 3;Notch 3 extracellular truncation;Notch 3 intracellular domain	2.01894	0.83024	1.67505	O	-	-	-
559	CLSEGQPPPSYNWTR	Q96NY8	PVRL4	Nectin-4;Processed poliovirus receptor-related protein 4	0.0607951	1.43142	2.25668	O	-	O	-
560	CLSPDVTPCFCTINFTLEK	Q9NV96	TMEM30A	Cell cycle control protein 50A	0.0891019	0.606277	0.839731	O	-	-	↓
561	CLYGEAYPACSPGNTSTAEEELCR	O76024	WFS1	Wolframin	1.6433	0.330587	2.92168	-	O	O	-
562	CMNTTLTECDFSSLSK	Q08334	IL10RB	Interleukin-10 receptor subunit beta	2.33318	0.942001	2.03552	O	-	O	-
563	CNASSQFLCSSGR	Q07954	LRP1	Prolow-density lipoprotein receptor-related protein 1;Low-density lipoprotein receptor-related protein 1 85 kDa subunit;Low-density lipoprotein receptor-related protein 1 515 kDa subunit;Low-density lipoprotein receptor-related protein 1 intracellular domain	0.727995	1.12904	1.57943	-	-	-	-
564	CNGSGTYVCGLCECSPGYLGTR	P18084	ITGB5	Integrin beta-5	0.180454	0.229704	2.13214	O	O	O	-
568	CNTTDVSVANGTAELLHTEHIWYPR	Q9UGH3	SLC23A2	Solute carrier family 23 member 2	1.98	0.548001	1.63921	-	-	-	-
569	CPLYGVATLNGSSLALSR	Q7Z7N9	TMEM179B	Transmembrane protein 179B	1.13446	0.705613	0.414746	-	-	O	-
570	CRNYSLLIDQPDK	Q9NY97	B3GNT2	N-acetyllactosaminide beta-1,3-N-acetylglucosaminyltransferase 2	0.684727	0.557078	1.36197	-	-	-	-
571	CTEGVGYTNASNNLFACLPCTACK	O00220	TNFRSF10A	Tumor necrosis factor receptor superfamily member 10A	1.47836	7.29243	2.78234	-	O	O	↑
573	CTLIDALNVTR	P15848	ARSB	Arylsulfatase B	2.04344	0.825992	3.52739	O	-	O	-
574	CTNLSEGVLSVR	Q93063	EXT2	Exostosin-2	1.91123	0.928259	8.19078	-	-	O	-
576	CVGFGPEEELTNITDVQFLQSTR	Q9Y2U8	LEMD3	Inner nuclear membrane protein Man1	2.01224	1.02236	0.060033	O	-	O	-
579	CVYEALCNTTSECPPPVITR	O15031	PLXNB2	Plexin-B2	3.84798	0.653066	2.19588	O	-	O	-
580	CYILENDTVQCDLDLYK	Q8IWU5	SULF2	Extracellular sulfatase Sulf-2	3.34545	0.431715	2.05623	O	O	O	-
582	CYVIPLNTSIVMPPR	Q9Y287	ITM2B	Integral membrane protein 2B;BRI2, membrane form;BRI2 intracellular domain;BRI2C, soluble form;Bri23 peptide	2.11946	0.221334	2.0082	O	O	O	-
585	DADACNATNWIEYMFNK	O15118	NPC1	Niemann-Pick C1 protein	1.89513	2.29787	13.8681	-	O	O	↑
605	DAGVGFPEYQEEDNSTYNFR	P11717	IGF2R	Cation-independent mannose-6-phosphate receptor	0.026404	0.0807721	1.99806	O	O	-	-
613	DALSLQFEPVLLPTSTTNFTK	A2VDJ0	KIAA0922	Transmembrane protein 131-like	10.4708	0.284668	1.65107	O	O	-	-
614	DANLTGLSDNK	Q99574	SERPINI1	Neuroserpin	0.840838	1.13438	2.52363	-	-	O	-
615	DANLTGLSDNKEIFLSK	Q99574	SERPINI1	Neuroserpin	0.850628	2.55054	0.838626	-	O	-	-
620	DASSFLAEWQNITK	P08195	SLC3A2	4F2 cell-surface antigen heavy chain	2.13022	0.849832	2.2584	O	-	O	-
622	DAVAFTCEPEAQNTTYLWWVNGQSLPVSPR	P06731	CEACAM5	Carcinoembryonic antigen-related cell adhesion molecule 5	2.57202	1.51703	0.684869	O	-	-	-
627	DAYENLTAK	Q96L58	B3GALT6	Beta-1,3-galactosyltransferase 6	1.1607	2.10607	1.12943	-	O	-	↑
632	DCSANTTSCHILGWGK	Q92876	KLK6	Kallikrein-6	62.9223	0.528363	2.43885	O	-	O	-
633	DCSCIPQNLSSGFGHATAGK	Q96BD0	SLCO4A1	Solute carrier organic anion transporter family member 4A1	1.13249	0.347492	0.379613	-	O	O	-
634	DCVECLLLHSGKPDNQTCHSLCR	P18084	ITGB5	Integrin beta-5	1.24212	0.958699	2.3227	-	-	O	-
635	DCVLQCEEQNCSGGALNHFR	Q96FM1	PGAP3	Post-GPI attachment to proteins factor 3	0.171004	0.108894	83.9408	O	O	O	-
636	DCVSNGSLGCPVR	Q9HCN3	TMEM8A	Transmembrane protein 8A	1.31321	0.77255	0.184527	-	-	O	-
637	DDAGNYTCIASNGPQGQIR	Q13308	PTK7	Inactive tyrosine-protein kinase 7	0.799129	0.751294	2.0819	-	-	O	-
639	DDDIAALVVDNGSGMCK	P60709	ACTB	Actin, cytoplasmic 1;Actin, cytoplasmic 1, N-terminally processed	1.17121	1.26186	1.4873	-	-	-	↑
647	DDSSLPEYSAFNTSVHAAIR	P15848	ARSB	Arylsulfatase B	5.67295	0.824019	1.99308	O	-	-	-
653	DEGLCSANVTR	P48307	TFPI2	Tissue factor pathway inhibitor 2	0.770357	2.11594	0.756966	-	O	-	-
657	DEIGNVSTSHLLILDDSVEMEIRPR	P04843	RPN1	Dolichyl-diphosphooligosaccharide--protein glycosyltransferase subunit 1	2.72584	0.784938	5.84864	O	-	O	-
670	DFEDLYTPVNGSIVIVR	P02786	TFRC	Transferrin receptor protein 1;Transferrin receptor protein 1, serum form	2.05082	0.768731	1.51687	O	-	-	-
673	DFNETQLAR	Q9H6X2	ANTXR1	Anthrax toxin receptor 1	1.71416	0.674271	1.465	-	-	-	-
676	DFQDPDGIEGSENVTLCR	A1A5B4	ANO9	Anoctamin-9	1.59494	0.287055	5.05111	-	O	O	-
680	DFYQATISESAANLTQVLR	Q6V0I7	FAT4	Protocadherin Fat 4	0.738413	0.0816389	0.427768	-	O	O	↓
685	DGDDEWTSVVVANVSK	Q92823	NRCAM	Neuronal cell adhesion molecule	1.61754	0.905289	2.50342	-	-	O	-
696	DGNSSLIAAVAEVR	P78504	JAG1	Protein jagged-1	0.962594	0.685273	4.65377	-	-	O	-
698	DGSDEPGTAACPNGSFHCTNTGYKPLYIPSNR	P14314	PRKCSH	Glucosidase 2 subunit beta	1.86219	56.7107	3.45503	-	O	O	↑
705	DGYMVVNVSSLSLNEPEDK	Q5VW38	GPR107	Protein GPR107	2.17226	2.29636	0.0817861	O	O	O	-
706	DGYMVVNVSSLSLNEPEDKDVTIGFSLDR	Q5VW38	GPR107	Protein GPR107	1.68086	0.215446	2.17679	-	O	O	-
708	DHFTFCQQLNISICPLSQTAAR	O00754	MAN2B1	Lysosomal alpha-mannosidase;Lysosomal alpha-mannosidase A peptide;Lysosomal alpha-mannosidase B peptide;Lysosomal alpha-mannosidase C peptide;Lysosomal alpha-mannosidase D peptide;Lysosomal alpha-mannosidase E peptide	0.270781	0.312841	24.2767	O	O	O	-
714	DHVNVSMVEVTDFPFNTSEWEGYLPK	P15907	ST6GAL1	Beta-galactoside alpha-2,6-sialyltransferase 1	0.598864	0.795261	619.474	-	-	O	-
715	DHVVVPANTTSVILSGLR	P32004	L1CAM	Neural cell adhesion molecule L1	5.48009	0.899347	2.54242	O	-	O	-
716	DIAINISR	Q6QNY1	BLOC1S2	Biogenesis of lysosome-related organelles complex 1 subunit 2	1.11644	1.41475	5.8022	-	-	O	↑
720	DIECQAESFPNWTLAQVGQK	Q9HC84	MUC5B	Mucin-5B	7.97232	1.59394	1.50285	O	-	-	↑
726	DIGNYSCAAQGTQTGSK	Q9NYQ6	CELSR1	Cadherin EGF LAG seven-pass G-type receptor 1	1.23954	0.376834	18.8592	-	O	O	-
735	DINGTLLSQATCELCDGNENSFMVVNALGDR	Q5HYA8	TMEM67	Meckelin	0.357372	2.02027	94.9963	O	O	O	-
737	DINTTAQNIMFYDMGSGSTVCTIVTYQMVK	Q9Y4L1	HYOU1	Hypoxia up-regulated protein 1	153.65	1.39407	3.69994	O	-	O	↑
738	DINVTGVWER	Q16549	PCSK7	Proprotein convertase subtilisin/kexin type 7	1.75479	0.864747	2.83962	-	-	O	-
744	DITDLINNTFIR	Q99523	SORT1	Sortilin	1.56852	0.617303	2.15741	-	-	O	-
748	DIVEYYNDSNGSHVLQGR	P25311	AZGP1	Zinc-alpha-2-glycoprotein	1.53421	0.347793	2.14221	-	O	O	-
751	DIVSSDFLSNMSMDFQNHLGSCQK	P00533	EGFR	Epidermal growth factor receptor	2.08855	1.74418	1.47274	O	-	-	↑
759	DLCGPDAGPIGNATGQADCK	Q8NBI5	SLC43A3	Solute carrier family 43 member 3	1.89632	0.672404	1.5015	-	-	-	-
760	DLDMFINASK	O75882	ATRN	Attractin	4.77632	1.45372	1.99336	O	-	-	↑
765	DLEITNATLQSEEDSR	Q6P179	ERAP2	Endoplasmic reticulum aminopeptidase 2	1.18444	0.0507113	1.54917	-	O	-	-
770	DLFNLSAPLAR	Q9H9S5	FKRP	Fukutin-related protein	1.50932	0.773005	1.69549	-	-	-	-
774	DLGPNTTIK	Q96BA8	CREB3L1	Cyclic AMP-responsive element-binding protein 3-like protein 1;Processed cyclic AMP-responsive element-binding protein 3-like protein 1	3.76252	1.28976	0.275495	O	-	O	-
775	DLGPTLANSTHHNVR	P04062	GBA	Glucosylceramidase	1.61228	0.899472	2.63499	-	-	O	-
776	DLGQGQGQVQVQNGTLR	Q9P2J2	IGSF9	Protein turtle homolog A	1.44673	0.831075	3.23597	-	-	O	-
787	DLLGSGYTETYTAANGSEVTEQPR	P78325	ADAM8	Disintegrin and metalloproteinase domain-containing protein 8	0.398292	1.37731	0.317494	O	-	O	-
794	DLNETIHYMYK	Q99538	LGMN	Legumain	1.15069	0.91187	2.4765	-	-	O	-
795	DLNETLLR	Q13253	NOG	Noggin	5.60067	0.734915	0.788346	O	-	-	-
797	DLPIMFDVLIHDPSHFLNYSTINYK	Q14956	GPNMB	Transmembrane glycoprotein NMB	0.195034	0.357881	1.08809	O	O	-	-
800	DLQAPLGQSFSCSNSSIILSPAVHLDLLSLR	P34810	CD68	Macrosialin	0.375973	0.253332	73.6187	O	O	O	-
816	DLVPATNYSLR	Q06418	TYRO3	Tyrosine-protein kinase receptor TYRO3	1.65944	0.815948	13.7685	-	-	O	-
817	DLVVQQLVNVSR	Q6P4Q7	CNNM4	Metal transporter CNNM4	1.41049	1.03419	2.50116	-	-	O	↑
819	DLYEYSWVQGPLHSNETDR	Q92542	NCSTN	Nicastrin	0.60853	0.823192	1.1256	-	-	-	-
820	DLYEYSWVQGPLHSNETDRLPR	Q92542	NCSTN	Nicastrin	0.61272	57.0617	11.4995	-	O	O	-
821	DLYVVEYGSNMTIECK	Q9NZQ7	CD274	Programmed cell death 1 ligand 1	3.84904	1.8335	2.37759	O	-	O	↑
822	DMNQTLGDNITVK	Q8TCT8	SPPL2A	Signal peptide peptidase-like 2A	1.12709	0.984048	1.86632	-	-	-	-
823	DMSDEVGCVNVTLCEGPNK	P01130	LDLR	Low-density lipoprotein receptor	4.29215	0.627571	3.94001	O	-	O	-
824	DMSDGFISNLTIQR	P13674	P4HA1	Prolyl 4-hydroxylase subunit alpha-1	1.55833	1.2789	2.66937	-	-	O	↑
825	DMVTYFMNLSQANAQGTPR	Q92485	SMPDL3B	Acid sphingomyelinase-like phosphodiesterase 3b	0.825191	0.243442	2.34746	-	O	O	-
826	DNATDSVPLR	Q07954	LRP1	Prolow-density lipoprotein receptor-related protein 1;Low-density lipoprotein receptor-related protein 1 85 kDa subunit;Low-density lipoprotein receptor-related protein 1 515 kDa subunit;Low-density lipoprotein receptor-related protein 1 intracellular domain	0.687628	2.82627	1.42277	-	O	-	-
827	DNATEEEILVYLEK	P07602	PSAP	Prosaposin;Saposin-A;Saposin-B-Val;Saposin-B;Saposin-C;Saposin-D	2.68719	0.75862	0.889582	O	-	-	-
828	DNATLQATLHAAR	O15230	LAMA5	Laminin subunit alpha-5	1.37164	0.945664	3.25735	-	-	O	-
830	DNFTCVTDGLCFVSVTETTDK	P36897	TGFBR1	TGF-beta receptor type-1	4.95265	0.260003	4.13074	O	O	O	-
833	DNLTAFQK	Q9NYU1	UGGT2	UDP-glucose:glycoprotein glucosyltransferase 2	4.50585	2.24513	1.96728	O	O	-	↑
838	DNSSGTFIVLIR	O43567	RNF13	E3 ubiquitin-protein ligase RNF13	1.60047	0.502885	2.03031	-	-	O	-
839	DNSTLAVDIYK	P49281	SLC11A2	Natural resistance-associated macrophage protein 2	1.30667	0.156773	1.55585	-	O	-	-
841	DNTTCYEFK	Q07954	LRP1	Prolow-density lipoprotein receptor-related protein 1;Low-density lipoprotein receptor-related protein 1 85 kDa subunit;Low-density lipoprotein receptor-related protein 1 515 kDa subunit;Low-density lipoprotein receptor-related protein 1 intracellular domain	0.529352	0.881358	1.1874	-	-	-	-
846	DPGAAVPGAANASAQQPR	P28300	LOX	Protein-lysine 6-oxidase	0.52268	1.28067	3.92312	-	-	O	-
850	DPQGWVAGNLSAR	Q04912	MST1R	Macrophage-stimulating protein receptor;Macrophage-stimulating protein receptor alpha chain;Macrophage-stimulating protein receptor beta chain	1.37145	1.16183	2.61407	-	-	O	↑
853	DPYCAWSVNTSR	Q9C0C4	SEMA4C	Semaphorin-4C	1.32225	1.08583	5.19491	-	-	O	↑
856	DQGSPALSANVSLR	Q9Y5G0	PCDHGB5;PCDHGB4;PCDHGB7;PCDHGB2;PCDHGB1	Protocadherin gamma-B5;Protocadherin gamma-B4;Protocadherin gamma-B7;Protocadherin gamma-B2;Protocadherin gamma-B1	2.04869	0.911807	1.98839	O	-	-	-
862	DRDNDSDDVESNLLLPAGIALR	Q9NZM1	MYOF	Myoferlin	0.625768	1.26589	2.12285	-	-	O	-
863	DRLNLSENYTLSISNAR	Q13740	ALCAM	CD166 antigen	0.582649	0.159497	4.98986	-	O	O	-
869	DSCQQGSNMTLIGENGHSTDTLTGSGFR	Q9NS15	LTBP3	Latent-transforming growth factor beta-binding protein 3	4.64765	0.167595	14.2639	O	O	O	-
873	DSITGSGLENATISVAGINHNITTGR	O75976	CPD	Carboxypeptidase D	1.51488	0.797607	2.37825	-	-	O	-
874	DSLACFNQTYTINLYLVETGR	Q8N766	EMC1	ER membrane protein complex subunit 1	2.64891	0.061503	0.296232	O	O	O	-
877	DSLNSSHPISSSVQSSEQIEEMFDSLSYFK	Q9UIQ6	LNPEP	Leucyl-cystinyl aminopeptidase;Leucyl-cystinyl aminopeptidase, pregnancy serum form	0.0276611	0.0876258	2.62279	O	O	O	-
878	DSLNSSRPISKPAETPTQIQEMFDEVSYNK	Q6P179	ERAP2	Endoplasmic reticulum aminopeptidase 2	1.86723	0.785918	102.701	-	-	O	-
879	DSLSINATNIK	P00533	EGFR	Epidermal growth factor receptor	0.376651	0.951318	20.2367	O	-	O	-
882	DSPVLPVTLQCNLTSSSHTLTYSYWTK	Q9Y639	NPTN	Neuroplastin	1.73845	0.0197569	1.80275	-	O	-	-
883	DSSGNETHFTGNEVGFFKPISCR	Q9BX74	TM2D1	TM2 domain-containing protein 1	0.521486	6.93334	2.79665	-	O	O	-
886	DSVINLSESVEDGPK	Q16706	MAN2A1	Alpha-mannosidase 2	1.35182	0.69955	2.34518	-	-	O	-
888	DTAVEGEEIEVNCTAMASK	Q9BY67	CADM1	Cell adhesion molecule 1	2.56881	3.87837	2.67048	O	O	O	↑
889	DTAVEGEEIEVNCTAMASKPATTIR	Q9BY67	CADM1	Cell adhesion molecule 1	8.13927	0.413483	219.184	O	O	O	-
890	DTCTQECSYFNITK	P05556	ITGB1	Integrin beta-1	1.67168	0.987567	2.10205	-	-	O	-
892	DTFFNLSLK	Q9NY97	B3GNT2	N-acetyllactosaminide beta-1,3-N-acetylglucosaminyltransferase 2	1.35257	1.12451	2.37759	-	-	O	↑
897	DTGELNVTSILDR	Q14126	DSG2	Desmoglein-2	1.49309	0.93423	0.931611	-	-	-	-
898	DTNGSQFFITTVK	P23284	PPIB	Peptidyl-prolyl cis-trans isomerase B	1.15149	0.944813	1.71356	-	-	-	-
903	DTWGLSDEHFQPRPEAVQFFNVTTLQK	O75718	CRTAP	Cartilage-associated protein	73.3081	0.565559	0.883131	O	-	-	-
904	DVCAANGSGGDEGPDPDLICR	Q9UIG8	SLCO3A1	Solute carrier organic anion transporter family member 3A1	0.0803198	0.852133	1.0225	O	-	-	-
919	DVFGWGNLTCPICK	P17405	SMPD1	Sphingomyelin phosphodiesterase	0.325877	0.747736	1.33081	O	-	-	-
928	DVLNFTCEPK	P11464	PSG1;PSG8	Pregnancy-specific beta-1-glycoprotein 1;Pregnancy-specific beta-1-glycoprotein 8	5.12517	2.21223	1.53709	O	O	-	↑
931	DVLWFRPTLLNDTGNYTCMLR	Q9NPH3	IL1RAP	Interleukin-1 receptor accessory protein	0.238226	0.0365864	2.24342	O	O	O	-
933	DVNCSVMGPQEK	P53634	CTSC	Dipeptidyl peptidase 1;Dipeptidyl peptidase 1 exclusion domain chain;Dipeptidyl peptidase 1 heavy chain;Dipeptidyl peptidase 1 light chain	1.20164	6.95114	4.31931	-	O	O	↑
934	DVNFTLDGYVQR	P78357	CNTNAP1	Contactin-associated protein 1	1.00139	0.950396	1.44303	-	-	-	-
935	DVNYTQIVVDR	Q92854	SEMA4D	Semaphorin-4D	2.88366	1.58206	1.19483	O	-	-	↑
937	DVQIIVFPEDGIHGFNFTR	P43251	BTD	Biotinidase	2.86592	0.671542	2.5617	O	-	O	-
939	DVTALNVSTLK	Q99102	MUC4	Mucin-4;Mucin-4 alpha chain;Mucin-4 beta chain	0.720065	1.08166	0.82302	-	-	-	-
945	DVVTAAGDMLKDNATEEEILVYLEK	P07602	PSAP	Prosaposin;Saposin-A;Saposin-B-Val;Saposin-B;Saposin-C;Saposin-D	2.38816	1.52663	4.6696	O	-	O	↑
948	DVYSNLSHLPGAPGGPPAPQGLPYCPER	O60512	B4GALT3	Beta-1,4-galactosyltransferase 3;N-acetyllactosamine synthase;Beta-N-acetylglucosaminylglycopeptide beta-1,4-galactosyltransferase;Beta-N-acetylglucosaminyl-glycolipid beta-1,4-galactosyltransferase	1.81077	0.657152	52.8049	-	-	O	-
958	DYGSQEDFTQVWNTTMK	O60635	TSPAN1	Tetraspanin-1	25.668	1.33214	1.54778	O	-	-	↑
966	DYNSSREDSLQDAWDYVQAQVK	P27701	CD82	CD82 antigen	0.109979	0.668245	0.395486	O	-	O	↓
976	DYYIISTSNGSLEGLDNQEGGVCQTR	P52799	EFNB2	Ephrin-B2	0.0413979	0.0337364	5.78654	O	O	O	-
978	DYYPINESLASLPLR	O96005	CLPTM1	Cleft lip and palate transmembrane protein 1	1.81026	1.24255	2.35169	-	-	O	↑
981	EACQGTSPPVVSCYNASDHVYK	O95274	LYPD3	Ly6/PLAUR domain-containing protein 3	1.88714	0.789302	78.5424	-	-	O	-
988	EAESLQPMTVVGTDYVFHNDTK	O15031	PLXNB2	Plexin-B2	3.52152	0.53598	3.38417	O	-	O	-
990	EAFNETNQAIR	O95477	ABCA1	ATP-binding cassette sub-family A member 1	0.253718	1.15257	1.90105	O	-	-	-
992	EAGNHTSGAGLVQINK	P20645	M6PR	Cation-dependent mannose-6-phosphate receptor	0.152513	0.940761	2.43294	O	-	O	-
993	EAGNITTDGYEILGK	Q99715	COL12A1	Collagen alpha-1(XII) chain	1.36547	0.79899	3.66802	-	-	O	-
995	EAINITLDHK	O00469	PLOD2	Procollagen-lysine,2-oxoglutarate 5-dioxygenase 2	1.3357	0.855121	1.52658	-	-	-	-
1003	EASIVGENETYPR	Q9UBV2	SEL1L	Protein sel-1 homolog 1	1.11311	0.976573	2.27316	-	-	O	-
1022	EDTVLEVTESNTTSVVDGDK	Q9NQ36	SCUBE2	Signal peptide, CUB and EGF-like domain-containing protein 2	63.7653	0.53585	0.162792	O	-	O	-
1023	EDTVLEVTESNTTSVVDGDKR	Q9NQ36	SCUBE2	Signal peptide, CUB and EGF-like domain-containing protein 2	5.99725	0.893537	2.48578	O	-	O	-
1025	EDVQALNISVPYGPIPVDFQR	P22304	IDS	Iduronate 2-sulfatase;Iduronate 2-sulfatase 42 kDa chain;Iduronate 2-sulfatase 14 kDa chain	2.48458	3.85719	1.85523	O	O	-	↑
1026	EDVYRNHSIFLADINQER	P50897	PPT1	Palmitoyl-protein thioesterase 1	0.800348	0.420915	116.841	-	O	O	-
1029	EEAMLYHNQTAELR	Q92791	LEPREL4	Synaptonemal complex protein SC65	6.16842	3.97086	2.05937	O	O	O	↑
1033	EEEAIQLDGLNASQIR	P14625	HSP90B1	Endoplasmin	1.89015	0.822963	1.17887	-	-	-	-
1036	EEEIAALVIDNGSGMCK	P63261	ACTG1	Actin, cytoplasmic 2;Actin, cytoplasmic 2, N-terminally processed	0.979285	0.947239	1.49713	-	-	-	-
1041	EELGVTVYQSPHSGSFTITGNNSNFAQR	P32004	L1CAM	Neural cell adhesion molecule L1	7.03866	0.621596	0.415581	O	-	O	-
1047	EERPLNASALK	O14657	TOR1B	Torsin-1B	36.1669	0.122946	1.96782	O	O	-	-
1049	EETLLYDSNTSSMADR	Q9UIQ6	LNPEP	Leucyl-cystinyl aminopeptidase;Leucyl-cystinyl aminopeptidase, pregnancy serum form	1.66798	0.933162	1.84459	-	-	-	-
1050	EETLLYDSNTSSMADRK	Q9UIQ6	LNPEP	Leucyl-cystinyl aminopeptidase;Leucyl-cystinyl aminopeptidase, pregnancy serum form	2.08262	7.00823	12.4338	O	O	O	↑
1055	EFCNLSLSER	Q86UK0	ABCA12	ATP-binding cassette sub-family A member 12	0.869224	1.15069	1.81391	-	-	-	-
1056	EFENGSICVECDPQCEK	Q15303	ERBB4	Receptor tyrosine-protein kinase erbB-4;ERBB4 intracellular domain	1.89658	0.802487	1.97602	-	-	-	-
1058	EFGFAWPESLNCSK	Q9ULV1	FZD4	Frizzled-4	25.8573	0.372846	1.67006	O	O	-	-
1074	EGFSANYSVLQSSVSEDFK	O14786	NRP1	Neuropilin-1	0.145088	0.051578	3.88496	O	O	O	-
1090	EGSGYFFLNTSTADVVK	Q8TEM1	NUP210	Nuclear pore membrane glycoprotein 210	1.91017	0.868411	2.25418	-	-	O	-
1091	EGSLPGNSTISIR	Q16787	LAMA3	Laminin subunit alpha-3	1.5791	0.138202	3.40157	-	O	O	-
1104	EHWQPQETNESLK	Q9Y2B1	TMEM5	Transmembrane protein 5	0.892671	0.577343	11.4677	-	-	O	-
1111	EIFVANGTQGK	O95297	MPZL1	Myelin protein zero-like protein 1	1.18058	0.81776	2.17196	-	-	O	-
1131	EKLNDTYVNVGLYSTK	O14524	TMEM194A	Transmembrane protein 194A	0.646132	0.740053	5.4347	-	-	O	-
1140	ELASQIVLNISAR	Q6V0I7	FAT4	Protocadherin Fat 4	0.882458	0.338505	1.31221	-	O	-	-
1147	ELDLTCNITTDR	Q9P2B2	PTGFRN	Prostaglandin F2 receptor negative regulator	2.03482	0.961627	2.2107	O	-	O	-
1152	ELEYDYTGDPGTGNCSVCAAAGQGR	Q3MIR4	TMEM30B	Cell cycle control protein 50B	136.192	1.18152	2.19238	O	-	O	↑
1153	ELFNFSSCQGQEDCAFDGVYQPPLR	Q5MY95	ENTPD8	Ectonucleoside triphosphate diphosphohydrolase 8	3.6258	2.62215	20.702	O	O	O	↑
1154	ELFYGHGDHLIDQGLDVGNLTQQR	Q7Z7M9	GALNT5	Polypeptide N-acetylgalactosaminyltransferase 5	1.12054	0.136967	4.09738	-	O	O	-
1156	ELGDNVSMILVPFK	Q11201	ST3GAL1	CMP-N-acetylneuraminate-beta-galactosamide-alpha-2,3-sialyltransferase 1	1.95166	1.70444	2.05011	-	-	O	↑
1157	ELGGAIDFGAAYVLEQASSHIGNSTQATVR	Q6DD88	ATL3	Atlastin-3	0.150695	3.43355	13.7723	O	O	O	-
1161	ELGPLYTNITADIGTDPR	O60512	B4GALT3	Beta-1,4-galactosyltransferase 3;N-acetyllactosamine synthase;Beta-N-acetylglucosaminylglycopeptide beta-1,4-galactosyltransferase;Beta-N-acetylglucosaminyl-glycolipid beta-1,4-galactosyltransferase	32.6928	0.179387	83.9757	O	O	O	-
1165	ELGVVMYNCSCLAR	Q8IV08	PLD3	Phospholipase D3	0.1344	0.906482	27.0527	O	-	O	-
1168	ELILNTSSLLCDCHLK	O94898	LRIG2	Leucine-rich repeats and immunoglobulin-like domains protein 2	1.84165	0.255705	2.17242	-	O	O	-
1169	ELISNASDALDK	P08238	HSP90AB1;HSP90B1	Heat shock protein HSP 90-beta;Endoplasmin	0.170637	0.730573	0.295494	O	-	O	↓
1172	ELISNSSDALDK	P07900	HSP90AA1;HSP90AA2P	Heat shock protein HSP 90-alpha;Heat shock protein HSP 90-alpha A2	0.0152494	0.807817	0.014354	O	-	O	↓
1173	ELLEEVGQNGSR	Q12866	MERTK	Tyrosine-protein kinase Mer	1.6489	0.751659	1.50765	-	-	-	-
1175	ELLESNFTLVGDDGTNK	Q96A33	CCDC47	Coiled-coil domain-containing protein 47	1.28138	1.16284	1.69678	-	-	-	↑
1176	ELLLDFANSSAELTGCLVR	Q86WC4	OSTM1	Osteopetrosis-associated transmembrane protein 1	2.97337	0.508123	1.00723	O	-	-	-
1177	ELLLNTSEVTVR	Q8N8Z6	DCBLD1	Discoidin, CUB and LCCL domain-containing protein 1	2.35822	0.43712	1.92519	O	O	-	-
1182	ELNESENSVFQAVYGLQR	Q6UWJ1	TMCO3	Transmembrane and coiled-coil domain-containing protein 3	4.80954	0.831449	0.82342	O	-	-	-
1184	ELPGVCNETMMALWEECKPCLK	P10909	CLU	Clusterin;Clusterin beta chain;Clusterin alpha chain	1.46703	0.953332	1.64855	-	-	-	-
1186	ELQQFNYTWLR	Q7Z7M9	GALNT5	Polypeptide N-acetylgalactosaminyltransferase 5	0.412739	0.626137	1.52341	O	-	-	-
1192	ELSEYNATAIK	P29323	EPHB2	Ephrin type-B receptor 2	1.09028	0.964364	1.68962	-	-	-	-
1205	ELYEPIWQNFTDPQLR	P12821	ACE	Angiotensin-converting enzyme;Angiotensin-converting enzyme, soluble form	10.2767	0.537021	1.08433	O	-	-	-
1208	ELYNGTADITLR	Q92508	PIEZO1	Piezo-type mechanosensitive ion channel component 1	1.85652	0.71524	1.15717	-	-	-	-
1213	EMLHNATFCLVPR	Q16394	EXT1	Exostosin-1	0.37488	0.831536	2.4321	O	-	O	-
1215	ENATTDLLTK	P28799	GRN	Granulins;Acrogranin;Paragranulin;Granulin-1;Granulin-2;Granulin-3;Granulin-4;Granulin-5;Granulin-6;Granulin-7	1.47478	0.891002	2.15278	-	-	O	-
1216	ENCSPTIPASNTADEEYEDGIER	Q14571	ITPR2	Inositol 1,4,5-trisphosphate receptor type 2	3.11687	0.409873	3.15185	O	O	O	-
1217	ENDTHCIDFSYLLYSQK	Q15262	PTPRK	Receptor-type tyrosine-protein phosphatase kappa	2.64231	2.58937	1.49174	O	O	-	↑
1218	ENGTDTVQEEEESPAEGSK	Q9Y4L1	HYOU1	Hypoxia up-regulated protein 1	356.411	0.0516281	1.75723	O	O	-	-
1219	ENGTNLTFIGDK	Q8NBN3	TMEM87A	Transmembrane protein 87A	1.48607	0.908936	1.13532	-	-	-	-
1229	ENQTWNLQR	Q9NXL6	SIDT1	SID1 transmembrane family member 1	1.08358	0.66232	1.45528	-	-	-	-
1230	ENSTDYLYPEQLK	P00749	PLAU	Urokinase-type plasminogen activator;Urokinase-type plasminogen activator long chain A;Urokinase-type plasminogen activator short chain A;Urokinase-type plasminogen activator chain B	1.59096	1.00856	2.05011	-	-	O	↑
1231	ENTSDPSLVIAFGR	P11279	LAMP1	Lysosome-associated membrane glycoprotein 1	1.91229	0.755577	1.24798	-	-	-	-
1232	ENTSSWYEVDSFTPFR	P17181	IFNAR1	Interferon alpha/beta receptor 1	1.76761	0.364932	1.10343	-	O	-	-
1237	EPGSNVTMSVDAECVPMVR	Q08380	LGALS3BP	Galectin-3-binding protein	1.06622	0.839004	2.92351	-	-	O	-
1238	EPLSDPVGTCYLSTDNFTR	P08648	ITGA5	Integrin alpha-5;Integrin alpha-5 heavy chain;Integrin alpha-5 light chain	1.14496	0.125173	20.6891	-	O	O	-
1245	EQINITLDHR	Q02809	PLOD1	Procollagen-lysine,2-oxoglutarate 5-dioxygenase 1	1.22493	0.999827	4.77136	-	-	O	-
1249	EQNYSDDVLANMISEPR	P05067	APP	Amyloid beta A4 protein;N-APP;Soluble APP-alpha;Soluble APP-beta;C99;Beta-amyloid protein 42;Beta-amyloid protein 40;C83;P3(42);P3(40);C80;Gamma-secretase C-terminal fragment 59;Gamma-secretase C-terminal fragment 57;Gamma-secretase C-terminal fragment 50;C31	1.62259	1.13847	11.877	-	-	O	↑
1252	EQTPEYNVTITATDR	Q9Y5G0	PCDHGB5	Protocadherin gamma-B5	2.00625	0.175233	1.41177	O	O	-	-
1256	ERFDNETFR	P18075	BMP7	Bone morphogenetic protein 7	1.05863	2.7862	1.45025	-	O	-	↑
1258	ERPPTFLTPEGNASNK	Q92823	NRCAM	Neuronal cell adhesion molecule	1.40786	0.189425	1.08328	-	O	-	-
1259	ERPPTFLTPEGNASNKEELR	Q92823	NRCAM	Neuronal cell adhesion molecule	1.09954	1.03821	4.21783	-	-	O	↑
1270	ESNITVLIK	Q9H5V8	CDCP1	CUB domain-containing protein 1	0.628986	1.08651	1.17756	-	-	-	-
1273	ESQLNLTVMAK	Q15223	PVRL1	Nectin-1	1.24453	0.644008	1.93254	-	-	-	-
1282	ETFTCWWRPGTDGGLPTNYSLTYHR	P16471	PRLR	Prolactin receptor	0.472505	1.99938	3.16258	O	-	O	-
1284	ETHLETNFTLK	P40189	IL6ST	Interleukin-6 receptor subunit beta	2.62115	0.913673	12.4287	O	-	O	-
1286	ETIGDYTWTNGSQPCVHLQAQIQIR	P34810	CD68	Macrosialin	0.419633	0.0434666	1.81479	O	O	-	-
1289	ETLSLYNITLK	Q9Y5G6	PCDHGA7	Protocadherin gamma-A7	1.81945	0.534644	1.86529	-	-	-	-
1292	ETNFSLASGLEAK	P56159	GFRA1	GDNF family receptor alpha-1	3.13117	1.54478	2.33545	O	-	O	↑
1299	ETVPEYNLSITAR	Q9UN70	PCDHGC3	Protocadherin gamma-C3	2.59134	2.07534	0.272306	O	O	O	-
1314	EVHLVQFHEPDIYNYSALLLSEDK	Q92854	SEMA4D	Semaphorin-4D	3.50448	0.0857512	0.158274	O	O	O	-
1315	EVIDTNLTTLR	Q16787	LAMA3	Laminin subunit alpha-3	16.3192	0.842267	3.1806	O	-	O	-
1316	EVLDYSTPTTNGTPEAALSEDINLIR	P08240	SRPR	Signal recognition particle receptor subunit alpha	0.0792964	0.19682	0.662779	O	O	-	↓
1317	EVLNYTAENICK	Q6PKC3	TXNDC11	Thioredoxin domain-containing protein 11	0.0365674	0.649544	25.0702	O	-	O	-
1318	EVLSSNVSWR	Q8IZF2	GPR116	Probable G-protein coupled receptor 116	2.46673	0.791796	1.28432	O	-	-	-
1323	EVPRNDTCPELPPPEWGWR	Q6UXD5	SEZ6L2	Seizure 6-like protein 2	0.909787	1.76724	1.72488	-	-	-	-
1333	EWNGTYHCIFR	Q8IZF2	GPR116	Probable G-protein coupled receptor 116	0.685629	0.828027	2.62369	-	-	O	-
1338	EYLEQISTLINTTDR	P42892	ECE1	Endothelin-converting enzyme 1	1.48473	0.179854	1.61608	-	O	-	-
1355	FAEINGSALCSYNLKPSEYTTSPK	Q8WWI5	SLC44A1	Choline transporter-like protein 1	1.84587	0.930611	2.95406	-	-	O	-
1387	FCNLTQVPQVLNTTER	O60602	TLR5	Toll-like receptor 5	0.615999	0.291961	1.24083	-	O	-	-
1393	FDEVYEALTHAHPNLTVYK	Q9UJA9	ENPP5	Ectonucleotide pyrophosphatase/phosphodiesterase family member 5	2.15278	0.685296	0.0336815	O	-	O	-
1396	FDGEPCDLSLNITWYLK	Q8NBN3	TMEM87A	Transmembrane protein 87A	7.2894	0.274514	18.5957	O	O	O	-
1399	FDINDTIR	Q96F81	DISP1	Protein dispatched homolog 1	0.657471	0.640447	1.96496	-	-	-	-
1402	FDLNTSYYIFLADGAANDGR	Q6ZNA5	FRRS1	Ferric-chelate reductase 1	3.56252	1.24418	0.744065	O	-	-	-
1404	FDNFSSLSIQWESTR	Q8TEM1	NUP210	Nuclear pore membrane glycoprotein 210	2.17362	5.10036	0.212878	O	O	O	-
1413	FEAEHISNYTALLLSR	Q9NPR2	SEMA4B	Semaphorin-4B	1.87462	0.858923	1.33302	-	-	-	-
1437	FFNFSWR	P42892	ECE1	Endothelin-converting enzyme 1	1.35952	0.638939	2.15696	-	-	O	-
1440	FFPYANGTLGIR	P32004	L1CAM	Neural cell adhesion molecule L1	1.29837	74.1976	2.29247	-	O	O	↑
1442	FFQNVTAEDTDSIGLALFAPHSSR	Q8TEM1	NUP210	Nuclear pore membrane glycoprotein 210	0.540513	1.19868	4.49618	-	-	O	-
1447	FGEFGNYSLLVK	Q68CP4	HGSNAT	Heparan-alpha-glucosaminide N-acetyltransferase	0.100663	0.884265	2.91723	O	-	O	-
1453	FGHFTGFNSSTLK	Q9BXP2	SLC12A9	Solute carrier family 12 member 9	1.43127	0.65241	2.17452	-	-	O	-
1455	FGNETFIIHLDNGR	Q8IXL6	FAM20C	Extracellular serine/threonine protein kinase FAM20C	1.53581	0.439383	3.71098	-	O	O	-
1456	FGNLTDLNLTK	Q5R3F8	ELFN2	Protein phosphatase 1 regulatory subunit 29	0.935364	1.32308	0.958002	-	-	-	-
1457	FGNLTYLNLTK	P0C7U0	ELFN1	Protein ELFN1	0.0406557	1.56727	2.2931	O	-	O	-
1466	FHMVQNVSMAVHHIGR	Q9Y4D7	PLXND1	Plexin-D1	12.969	0.382134	1.78745	O	O	-	-
1477	FILCNLTVEAVGADSASVR	Q7L0X0	TRIL	TLR4 interactor with leucine rich repeats	2.62061	0.64806	21.6111	O	-	O	-
1511	FLEYSTSECHFFNGTER	Q9GIY3	HLA-DRB1	HLA class II histocompatibility antigen, DRB1-14 beta chain;HLA class II histocompatibility antigen, DRB1-13 beta chain;HLA class II histocompatibility antigen, DRB1-11 beta chain;HLA class II histocompatibility antigen, DRB1-3 chain	0.127821	0.745045	1.29846	O	-	-	-
1516	FLGITPFLNYTR	P52849	NDST2	Bifunctional heparan sulfate N-deacetylase/N-sulfotransferase 2;Heparan sulfate N-deacetylase 2;Heparan sulfate N-sulfotransferase 2	6.61848	1.00989	2.47444	O	-	O	↑
1519	FLGSGGFIGYAPNLSK	Q02809	PLOD1	Procollagen-lysine,2-oxoglutarate 5-dioxygenase 1	0.436968	0.125009	0.76732	O	O	-	↓
1521	FLIPNASQAESK	P63104	YWHAZ	14-3-3 protein zeta/delta	0.00929068	0.815864	0.144666	O	-	O	↓
1528	FLNATCDEYFTR	Q9H2X9	SLC12A5	Solute carrier family 12 member 5	1.91999	4.44289	7.91122	-	O	O	↑
1529	FLNDSIVDPVDSEWFGFYR	P50897	PPT1	Palmitoyl-protein thioesterase 1	0.091233	3.4926	1.86193	O	O	-	-
1532	FLNESYK	P15309	ACPP	Prostatic acid phosphatase;PAPf39	9.29722	0.486327	5.08659	O	O	O	-
1533	FLNLSANELQPSLR	Q7L0X0	TRIL	TLR4 interactor with leucine rich repeats	1.37107	1.11508	3.23844	-	-	O	↑
1537	FLSNDTVQLNVK	P20273	CD22	B-cell receptor CD22	5.33541	1.11319	0.575425	O	-	-	-
1540	FLSSSPHLPPSSYFNASGR	O14773	TPP1	Tripeptidyl-peptidase 1	1.26532	0.849921	2.1598	-	-	O	-
1541	FLSYNVTR	Q8NBL1	POGLUT1	Protein O-glucosyltransferase 1	1.63433	0.858893	2.95079	-	-	O	-
1542	FLTQNLSLPNSTAQALLAAR	Q9BZC7	ABCA2	ATP-binding cassette sub-family A member 2	155.74	0.189688	1.81491	O	O	-	-
1556	FNDTEVLQR	P43251	BTD	Biotinidase	1.42672	0.23063	2.48199	-	O	O	-
1557	FNISIEPVIYVVQR	P23352	KAL1	Anosmin-1	1.84702	0.152001	1.70953	-	O	-	-
1558	FNISLQK	Q9P273	TENM3	Teneurin-3	0.646176	0.477625	32.9293	-	O	O	-
1559	FNISTPAFR	Q16787	LAMA3	Laminin subunit alpha-3	1.2105	0.248514	2.21499	-	O	O	-
1561	FNLTETSEAEIHQSFQHLLR	P01011	SERPINA3	Alpha-1-antichymotrypsin;Alpha-1-antichymotrypsin His-Pro-less	0.688964	0.467958	9.09264	-	O	O	-
1566	FNQTMQPLLTAQNALLEDDTYR	Q11201	ST3GAL1	CMP-N-acetylneuraminate-beta-galactosamide-alpha-2,3-sialyltransferase 1	5.47895	1.4871	2.18904	O	-	O	↑
1568	FNSSGQCEVPLVR	Q99835	SMO	Smoothened homolog	0.880503	1.06485	1.95274	-	-	-	-
1569	FNSTEYQVVTR	Q07954	LRP1	Prolow-density lipoprotein receptor-related protein 1;Low-density lipoprotein receptor-related protein 1 85 kDa subunit;Low-density lipoprotein receptor-related protein 1 515 kDa subunit;Low-density lipoprotein receptor-related protein 1 intracellular domain	0.922359	0.99385	1.804	-	-	-	-
1570	FNSTQIAAMAPEHEEPR	Q4G148	GXYLT1	Glucoside xylosyltransferase 1	1.87839	3.38264	4.6149	-	O	O	↑
1572	FNVSLDSVPELR	Q02083	NAAA	N-acylethanolamine-hydrolyzing acid amidase;N-acylethanolamine-hydrolyzing acid amidase subunit alpha;N-acylethanolamine-hydrolyzing acid amidase subunit beta	0.0304756	0.932645	608.031	O	-	O	-
1573	FNVSLTVK	P56199	ITGA1	Integrin alpha-1	1.45639	0.641024	3.03564	-	-	O	-
1574	FNVSSVEK	P10600	TGFB3	Transforming growth factor beta-3;Latency-associated peptide	1.75747	0.223655	3.02681	-	O	O	-
1575	FNVTGTPEQYVPYSTTR	Q9UI09	NDUFA12	NADH dehydrogenase [ubiquinone] 1 alpha subcomplex subunit 12	0.798188	0.751581	3.19674	-	-	O	-
1579	FPDEEGACQPCPINCTHSCVDLDDK	P04626	ERBB2	Receptor tyrosine-protein kinase erbB-2	33.5328	0.836623	2.0433	O	-	O	-
1584	FPSNLSGAVGEAVSR	Q9NS84	CHST7	Carbohydrate sulfotransferase 7	1.05592	0.282124	2.4693	-	O	O	-
1585	FPTHYMPYNESVSFEDR	Q9UJA9	ENPP5	Ectonucleotide pyrophosphatase/phosphodiesterase family member 5	13.662	2.13243	2.15338	O	O	O	↑
1591	FQINYTEYDCNR	Q96GX1	TCTN2	Tectonic-2	2.31787	1.21394	1.99239	O	-	-	↑
1594	FQLLNFSSSELK	Q9BY67	CADM1	Cell adhesion molecule 1	1002.79	0.65556	0.00142957	O	-	O	-
1600	FQVNNTRPPHVQLLR	P35475	IDUA	Alpha-L-iduronidase	1.05746	0.99072	3.62907	-	-	O	-
1607	FSADLGYNGTR	Q96NT5	SLC46A1	Proton-coupled folate transporter	1.17919	0.138389	1.88335	-	O	-	-
1608	FSAPNTTLNHLALAPGR	Q9ULL4	PLXNB3	Plexin-B3	1.25102	0.375283	36.1193	-	O	O	-
1615	FSGVNDTDFR	Q9UKY4	POMT2	Protein O-mannosyl-transferase 2	1.64091	0.88032	2.07153	-	-	O	-
1624	FSNISEGLSNYSIIDK	P21583	KITLG	Kit ligand;Soluble KIT ligand	0.909282	0.201074	6.28669	-	O	O	-
1644	FTFTSHTPGDHQICLHSNSTR	Q7Z7H5	TMED4	Transmembrane emp24 domain-containing protein 4	1.15581	0.451391	5.92042	-	O	O	-
1645	FTFTSHTPGEHQICLHSNSTK	Q9BVK6	TMED9	Transmembrane emp24 domain-containing protein 9	0.972048	0.460078	1.06231	-	O	-	-
1652	FTPPVVNVTWLR	P01903	HLA-DRA	HLA class II histocompatibility antigen, DR alpha chain	1.03807	0.668616	0.862203	-	-	-	-
1659	FVEQNETAINITTYPDQENNK	Q12841	FSTL1	Follistatin-related protein 1	0.859339	0.0786015	6.29759	-	O	O	-
1660	FVGTPEVNQTTLYQR	P01033	TIMP1	Metalloproteinase inhibitor 1	1.65864	1.01312	1.88387	-	-	-	↑
1661	FVHVNTSAVLK	Q9Y6A1	POMT1	Protein O-mannosyl-transferase 1	1.44043	0.23196	1.92345	-	O	-	-
1664	FVLQNASR	Q9NXH8	TOR4A	Torsin-4A	0.721464	0.34894	4.86318	-	O	O	-
1665	FVNSTGYLTEAEK	Q8NBK3	SUMF1	Sulfatase-modifying factor 1	1.17552	1.02751	2.49943	-	-	O	↑
1668	FVTAGSNVTLR	Q86VR7	VSIG10L	V-set and immunoglobulin domain-containing protein 10-like	0.911491	1.03029	1.78237	-	-	-	-
1676	FWLPENVSWADLEGPADGYGYPR	Q8N5B7	CERS5	Ceramide synthase 5	1.35238	0.0721528	3.26413	-	O	O	-
1677	FWLPHNVTWADLK	Q6ZMG9	CERS6	Ceramide synthase 6	1.00424	0.486108	46.3533	-	O	O	-
1678	FWLPPNVTWTELEDR	Q9HA82	CERS4	Ceramide synthase 4	1.43873	0.664573	1.07691	-	-	-	-
1679	FWLPPNVTWTELEDRDGR	Q9HA82	CERS4	Ceramide synthase 4	0.792345	0.404441	7.11074	-	O	O	-
1680	FWLVEGNSSR	Q58EX2	SDK2	Protein sidekick-2	1.23157	0.769237	2.64268	-	-	O	-
1682	FYATNDTEVAQSNFEALQDFFR	P10619	CTSA	Lysosomal protective protein;Lysosomal protective protein 32 kDa chain;Lysosomal protective protein 20 kDa chain	2.47478	0.437984	0.536705	O	O	-	-
1687	FYNYTLCR	Q8IWU5	SULF2	Extracellular sulfatase Sulf-2	1.66002	0.545329	2.29596	-	-	O	-
1688	FYNYTVCR	Q8IWU6	SULF1	Extracellular sulfatase Sulf-1	2.09188	0.370655	1.84587	O	O	-	-
1695	GADFDHVYSGVVNLSTENIYSFNYTSQPDQVTAVR	Q9NXL6	SIDT1	SID1 transmembrane family member 1	0.0485663	0.590926	0.0447832	O	-	O	↓
1698	GAEYVISPLPNASAPAAQR	Q8TE58	ADAMTS15	A disintegrin and metalloproteinase with thrombospondin motifs 15	3.80738	1.98798	0.892361	O	-	-	-
1713	GANVSWEPGFDGGYLQR	Q9P2J2	IGSF9	Protein turtle homolog A	1.06644	0.427946	3.33827	-	O	O	-
1717	GASNLTWR	P15586	GNS	N-acetylglucosamine-6-sulfatase	1.54285	0.456014	0.0568814	-	O	O	-
1723	GCFDGNVTLTAANVTVSLPVR	O95274	LYPD3	Ly6/PLAUR domain-containing protein 3	3.1606	0.761861	2.1851	O	-	O	-
1725	GCLSNFSSYLTK	O60858	TRIM13	E3 ubiquitin-protein ligase TRIM13	4.09794	0.97742	2.72093	O	-	O	-
1731	GDDIPEMNETVTLSLDR	Q8WXG9	GPR98	G-protein coupled receptor 98	1.03987	0.491155	5.67413	-	O	O	-
1740	GDPSVISVNGTDFTFR	Q9UHN6	TMEM2	Transmembrane protein 2	1.59538	0.136172	3.21006	-	O	O	-
1742	GDVFHNLTNLR	Q8IW52	SLITRK4	SLIT and NTRK-like protein 4	0.396612	0.174555	1.13069	O	O	-	-
1748	GEGNETTNMVITWKPLR	P32004	L1CAM	Neural cell adhesion molecule L1	0.222288	4.12773	2.05196	O	O	O	-
1751	GELNTSIFSSR	Q9UHG3	PCYOX1	Prenylcysteine oxidase 1	1.34285	1.07829	0.974747	-	-	-	-
1752	GELNTSIFSSRPIDK	Q9UHG3	PCYOX1	Prenylcysteine oxidase 1	0.390935	0.758095	2.65479	O	-	O	-
1753	GEPAIFNLSITEAHESGPYK	Q7Z6M3	MILR1	Allergin-1	2.42738	0.550972	1.91017	O	-	-	-
1756	GETASLLCNISVR	Q969P0	IGSF8	Immunoglobulin superfamily member 8	0.855417	0.737058	2.75796	-	-	O	-
1757	GETLEIGNYSFYALDNQNLR	P06213	INSR	Insulin receptor;Insulin receptor subunit alpha;Insulin receptor subunit beta	5.41177	0.899285	0.880991	O	-	-	-
1760	GEYFVNVTTR	P17301	ITGA2	Integrin alpha-2	1.57582	1.00657	2.35039	-	-	O	↑
1762	GFCANSSLAFPTK	Q9NRB3	CHST12	Carbohydrate sulfotransferase 12	16.6517	2.16557	4.99644	O	O	O	↑
1769	GFGVAIVGNYTAALPTEAALR	Q96PD5	PGLYRP2	N-acetylmuramoyl-L-alanine amidase	1.60893	0.363733	1.67238	-	O	-	-
1773	GFLASGSMIGTSTIEVIAQEPFGANQTIIVAVK	Q8TEM1	NUP210	Nuclear pore membrane glycoprotein 210	1.97479	0.323155	0.509693	-	O	-	-
1774	GFNASYIR	Q86SQ4	GPR126	G-protein coupled receptor 126	1.36424	0.977928	2.5463	-	-	O	-
1775	GFNLTLAK	Q9BY21	GPR87	G-protein coupled receptor 87	1.38223	0.679314	0.641313	-	-	-	-
1776	GFQDVEAQAATCNHTVMALMASLDAEK	Q10589	BST2	Bone marrow stromal antigen 2	25.886	119.159	7.7109	O	O	O	↑
1778	GFQWVTGDNNTSYSR	P07204	THBD	Thrombomodulin	2.6308	1.07397	2.43311	O	-	O	↑
1787	GFYLDGSDTIVCDSNSTWDPPVPK	P15529	CD46	Membrane cofactor protein	0.565893	1.13859	1.84318	-	-	-	-
1788	GGAEAMLVVNNSVLFPPSGNR	Q8TCT8	SPPL2A	Signal peptide peptidase-like 2A	1.85382	0.881816	2.25027	-	-	O	-
1789	GGAEAMLVVNNSVLFPPSGNRSEFPDVK	Q8TCT8	SPPL2A	Signal peptide peptidase-like 2A	1.17186	1.20777	100.308	-	-	O	↑
1790	GGGDPWTNGSGLALCQR	Q9GZU1	MCOLN1	Mucolipin-1	0.196691	0.497442	3.99252	O	O	O	-
1799	GGLNLTAVTVAAENNHTVAFLGTSDGR	O15031	PLXNB2	Plexin-B2	1.40766	0.74714	2.23985	-	-	O	-
1806	GHCWGPGPTQCVNCSQFLR	P04626	ERBB2	Receptor tyrosine-protein kinase erbB-2	0.016436	0.936078	2.7353	O	-	O	-
1809	GHEVEDVDLELFNTSVQLQPPTTAPGPETAAFIER	Q5UCC4	EMC10	ER membrane protein complex subunit 10	2.34941	0.866667	4.11502	O	-	O	-
1810	GHHNCSESLELEDPSSGLGVTK	P04233	CD74	HLA class II histocompatibility antigen gamma chain	1.36197	0.755472	1.15934	-	-	-	-
1811	GHHVSQEPWNSSITLTSQAGAVFQSFAK	O00115	DNASE2	Deoxyribonuclease-2-alpha	2.10497	0.658703	1.71285	O	-	-	-
1813	GHNSTFFGNVNESAVVR	P78357	CNTNAP1	Contactin-associated protein 1	0.691739	0.135517	3.78213	-	O	O	-
1815	GHPQILEAAGNASAGTVLLR	Q13332	PTPRS	Receptor-type tyrosine-protein phosphatase S	2.22145	5.6891	1.07788	O	O	-	↑
1816	GHTLTLNFTR	P11279	LAMP1	Lysosome-associated membrane glycoprotein 1	1.75285	0.789494	2.41664	-	-	O	-
1828	GIGNYSCSYR	Q8N6C5	IGSF1	Immunoglobulin superfamily member 1	1.64444	0.0990156	1.37907	-	O	-	-
1835	GILNATISVAEINHPVTTYK	O75976	CPD	Carboxypeptidase D	1.72656	0.607266	2.06108	-	-	O	-
1838	GINASSMAWAR	O15230	LAMA5	Laminin subunit alpha-5	0.377383	0.886658	12.5926	O	-	O	-
1846	GISYYIGAQSNFTK	Q9UN76	SLC6A14	Sodium- and chloride-dependent neutral and basic amino acid transporter B(0+)	1.63037	0.722365	0.713013	-	-	-	-
1856	GLCVNASAVSR	P17936	IGFBP3	Insulin-like growth factor-binding protein 3	2.23395	1.79048	6.22857	O	-	O	↑
1878	GLLHLENASYGIEPLQNSSHFEHIIYR	Q13443	ADAM9	Disintegrin and metalloproteinase domain-containing protein 9	2.22931	0.340576	1.24574	O	O	-	-
1880	GLLNLTYYQQIQVQK	Q9HAT2	SIAE	Sialate O-acetylesterase	1.4905	0.505979	0.0257301	-	-	O	-
1883	GLLYAASHSGVVQVPMANCSLYR	Q9NPR2	SEMA4B	Semaphorin-4B	28.0689	0.254405	0.112993	O	O	O	-
1885	GLNLTEDTYKPR	Q08380	LGALS3BP	Galectin-3-binding protein	1.27015	0.728045	0.838801	-	-	-	-
1886	GLNVSCLSVQGSASIVAPLLLR	Q9Y2G5	POFUT2	GDP-fucose protein O-fucosyltransferase 2	1.35219	8.68755	0.221212	-	O	O	-
1887	GLPGGNASLPR	Q9NPC4	A4GALT	Lactosylceramide 4-alpha-galactosyltransferase	1.77399	0.491274	1.66347	-	O	-	-
1888	GLPSLTSVSWNISVPR	Q9H5V8	CDCP1	CUB domain-containing protein 1	0.677879	0.72676	1.33265	-	-	-	-
1895	GLSHQVIASTLSLLNGSESAK	Q9UJ37	ST6GALNAC2	Alpha-N-acetylgalactosaminide alpha-2,6-sialyltransferase 2	0.0788579	0.627941	0.0952855	O	-	O	↓
1898	GLSPGNYSVR	P06213	INSR	Insulin receptor;Insulin receptor subunit alpha;Insulin receptor subunit beta	1.35491	1.05325	2.89467	-	-	O	↑
1900	GLSYNFTHLDGYLDLLR	P35475	IDUA	Alpha-L-iduronidase	92.373	0.96845	21.9219	O	-	O	-
1905	GLVSGGLYESHVGCRPYSIPPCEHHVNGSRPPCTGEGDTPK	P07858	CTSB	Cathepsin B;Cathepsin B light chain;Cathepsin B heavy chain	1.58601	0.394023	74.2079	-	O	O	-
1911	GNATLLLNLR	Q8WTR4	GDPD5	Glycerophosphodiester phosphodiesterase domain-containing protein 5	1.28967	1.36779	0.928324	-	-	-	-
1915	GNETIVNLIHSTR	P16870	CPE	Carboxypeptidase E	1.65875	0.550723	2.89929	-	-	O	-
1916	GNHTQSALLAGLR	Q7Z5N4	SDK1	Protein sidekick-1	1.49723	0.631148	0.442454	-	-	O	-
1917	GNITEYQCHQYITK	Q92896	GLG1	Golgi apparatus protein 1	0.818356	0.0708396	169.213	-	O	O	-
1918	GNLTFTAQYLSYR	Q08334	IL10RB	Interleukin-10 receptor subunit beta	92.6873	0.473537	0.679997	O	O	-	-
1919	GNLTYGYVTILNGSDIR	P08648	ITGA5	Integrin alpha-5;Integrin alpha-5 heavy chain;Integrin alpha-5 light chain	1.56569	0.701833	1.38953	-	-	-	-
1923	GNSTHGCSSEETFLIDCR	Q03405	PLAUR	Urokinase plasminogen activator surface receptor	1.28717	0.819661	1.49962	-	-	-	-
1925	GNTSGVLVVLTK	Q6P4Q7	CNNM4	Metal transporter CNNM4	1.84843	4.12087	2.14132	-	O	O	↑
1926	GNTTTLISENGHAADTLTATNFR	Q14766	LTBP1	Latent-transforming growth factor beta-binding protein 1	0.126096	3.45911	60.1628	O	O	O	-
1929	GNWSICNGNGSLELPGAVPGCVHSALFQQGLIQDSYYR	O00462	MANBA	Beta-mannosidase	0.0187301	0.381803	2.45786	O	O	O	-
1931	GNYTCIVENEYGSINHTYQLDVVER	P11362	FGFR1	Fibroblast growth factor receptor 1	10.4933	0.477228	1.3724	O	O	-	-
1932	GNYTCVVENEYGSINHTYHLDVVER	P21802	FGFR2	Fibroblast growth factor receptor 2	6.03268	0.698533	1.60492	O	-	-	-
1933	GPDSLIDGGNETVAAICIAATGK	Q9NQS3	PVRL3	Nectin-3	0.448568	0.0331729	1.02052	O	O	-	-
1934	GPECSQNYTTPSGVIK	O14786	NRP1	Neuropilin-1	0.37956	33.0608	1.00312	O	O	-	-
1938	GPGTLGWCVHNESCLPRPEQAR	Q7Z7M0	MEGF8	Multiple epidermal growth factor-like domains protein 8	2.36936	1.20001	1.34705	O	-	-	↑
1939	GPILPLQANLTR	O43889	CREB3	Cyclic AMP-responsive element-binding protein 3;Processed cyclic AMP-responsive element-binding protein 3	1.56233	1.62057	2.85166	-	-	O	↑
1942	GPNVTDSLTNR	Q13003	GRIK3	Glutamate receptor ionotropic, kainate 3	1.14385	0.189826	5.1202	-	O	O	-
1944	GPTFAPLPPVAPLHCAQTPYGCCQDNITAAR	O00468	AGRN	Agrin;Agrin N-terminal 110 kDa subunit;Agrin C-terminal 110 kDa subunit;Agrin C-terminal 90 kDa fragment;Agrin C-terminal 22 kDa fragment	5.71875	0.873331	2.86493	O	-	O	-
1947	GPYTLQGLLGCELGPDNTSVPTAK	P55899	FCGRT	IgG receptor FcRn large subunit p51	0.711236	0.29329	11.7216	-	O	O	-
1950	GQAQNYSTLLLEEASAR	Q9NTN9	SEMA4G	Semaphorin-4G	3.10609	0.292204	1.34985	O	O	-	-
1963	GQSYSVNVTFTSNIQSK	P61916	NPC2	Epididymal secretory protein E1	1.61295	0.659091	1.31376	-	-	-	-
1964	GQTALGFLYASGLGVNSSQAK	Q9UBV2	SEL1L	Protein sel-1 homolog 1	0.896205	0.12775	1.6867	-	O	-	-
1971	GQVLTADGTPLIGVNVSFFHYPEYGYTITR	Q9P273	TENM3	Teneurin-3	1.44183	0.734508	40.7944	-	-	O	-
1978	GRGPNVTDSLTNR	Q13003	GRIK3	Glutamate receptor ionotropic, kainate 3	3.14225	0.623863	4.84837	O	-	O	-
1980	GSALHEDIYVLHENGTLEIPVAQK	Q92823	NRCAM	Neuronal cell adhesion molecule	0.814112	1.33807	1.38569	-	-	-	-
1981	GSATFNSTEGVLQHLLR	Q8WXI7	MUC16	Mucin-16	0.197032	1.40844	1.27288	O	-	-	-
1985	GSGPASEFTFSTPEGVPGHPEALHLECQSNTSLLLR	P32004	L1CAM	Neural cell adhesion molecule L1	0.0333724	0.00441675	1.17666	O	O	-	-
1988	GSHYVAIVFESNSSYLGR	Q6ZRP7	QSOX2	Sulfhydryl oxidase 2	0.619725	0.176342	10.5971	-	O	O	-
1991	GSIVVEWTNNTLPLEPCPK	Q14118	DAG1	Dystroglycan;Alpha-dystroglycan;Beta-dystroglycan	2.55708	5.17766	10.6214	O	O	O	↑
1992	GSLEVNCSTTCNQPEVGGLETSLDK	P13598	ICAM2	Intercellular adhesion molecule 2	1.72393	0.866097	1.92292	-	-	-	-
1995	GSLSLTNLSSSMAGVYVCK	Q96AP7	ESAM	Endothelial cell-selective adhesion molecule	0.901688	0.479034	1.97137	-	O	-	-
1996	GSLSYLNVTR	P07339	CTSD	Cathepsin D;Cathepsin D light chain;Cathepsin D heavy chain	1.06984	0.867599	2.13007	-	-	O	-
1997	GSLSYLNVTRK	P07339	CTSD	Cathepsin D;Cathepsin D light chain;Cathepsin D heavy chain	1.3064	0.650378	10.3596	-	-	O	-
2000	GSNYSEILDK	Q12841	FSTL1	Follistatin-related protein 1	0.548096	0.4341	19.3076	-	O	O	-
2003	GSSTGAHISPQFPASGVNQTPVVDCR	Q6J4K2	SLC8B1	Sodium/potassium/calcium exchanger 6, mitochondrial	1.39426	0.236834	1.82665	-	O	-	-
2004	GSSVILNCSAYSEPSPK	Q92859	NEO1	Neogenin	3.1329	1.11632	1.73424	O	-	-	↑
2006	GSTLSQWSLGNGTPVTSK	Q7Z2K6	ERMP1	Endoplasmic reticulum metallopeptidase 1	1.46683	1.33719	1.74146	-	-	-	↑
2010	GSVALVIHNITAQENGTYR	Q7KYR7	BTN2A1	Butyrophilin subfamily 2 member A1	1.89303	0.912439	2.48837	-	-	O	-
2014	GTANLSETIR	P78324	SIRPA;SIRPB1	Tyrosine-protein phosphatase non-receptor type substrate 1;Signal-regulatory protein beta-1 isoform 3	1.18279	1.01681	1.61933	-	-	-	↑
2015	GTDPSLSPSPAALPPAPGTELSYLNGTFR	Q9UBG0	MRC2	C-type mannose receptor 2	1.1778	0.646176	1.19458	-	-	-	-
2019	GTEVNTTVIGENDPIDEVQGFLFGK	Q9NYU2	UGGT1	UDP-glucose:glycoprotein glucosyltransferase 1	5.62051	2.67548	1.25823	O	O	-	↑
2024	GTNFTHLVADR	Q9C0C4	SEMA4C	Semaphorin-4C	4.44752	0.248807	0.334969	O	O	O	-
2040	GVFITNETGQPLIGK	P10253	GAA	Lysosomal alpha-glucosidase;76 kDa lysosomal alpha-glucosidase;70 kDa lysosomal alpha-glucosidase	1.44043	0.170312	2.04443	-	O	O	-
2042	GVHNASLALSASIGR	O15230	LAMA5	Laminin subunit alpha-5	1.20639	0.463101	3.30443	-	O	O	-
2050	GVLMVGNETTYEDGHGSR	Q8IWA5	SLC44A2	Choline transporter-like protein 2	1.63524	0.82342	1.74945	-	-	-	-
2051	GVLMVGNETTYEDGHGSRK	Q8IWA5	SLC44A2	Choline transporter-like protein 2	0.515448	1.04765	32.6249	-	-	O	-
2052	GVNASAVVNVTVR	Q6UVK1	CSPG4	Chondroitin sulfate proteoglycan 4	0.564678	4.56701	1.17048	-	O	-	-
2055	GVSEPLMENGSGAWVR	O00754	MAN2B1	Lysosomal alpha-mannosidase;Lysosomal alpha-mannosidase A peptide;Lysosomal alpha-mannosidase B peptide;Lysosomal alpha-mannosidase C peptide;Lysosomal alpha-mannosidase D peptide;Lysosomal alpha-mannosidase E peptide	1.60837	1.15705	4.92628	-	-	O	↑
2057	GVTFNLSGGSSK	A8MVS5	HIDE1	Protein HIDE1	0.29185	1.22446	1.24859	O	-	-	-
2058	GVTFNVTTVDTK	O00299	CLIC1	Chloride intracellular channel protein 1	0.0931888	0.590803	0.394118	O	-	O	↓
2063	GVVDSDDLPLNVSR	P14625	HSP90B1	Endoplasmin	24.6224	1.23268	2.14355	O	-	O	↑
2066	GWAAPGPEPTYPNSTILPTPDTGPTGIK	Q8IWT6	LRRC8A	Volume-regulated anion channel subunit LRRC8A	176.155	0.919709	0.10083	O	-	O	-
2069	GWNWTSGFNK	P15328	FOLR1	Folate receptor alpha	0.899004	1.33404	2.06322	-	-	O	-
2070	GWQAEEGPLFHNQTSVTVDGR	Q8IZJ3	CPAMD8	C3 and PZP-like alpha-2-macroglobulin domain-containing protein 8	0.682973	0.325663	2.19801	-	O	O	-
2071	GWSCTDNSTAQTVAQQR	Q9HCN3	TMEM8A	Transmembrane protein 8A	1.6513	0.593266	1.94787	-	-	-	-
2074	GYAFNHSADFETVR	P61160	ACTR2	Actin-related protein 2	0.0204041	0.655174	1.69314	O	-	-	-
2079	GYEIHMFDSAMNITAYLGNTTDNFFK	Q92673	SORL1	Sortilin-related receptor	2.34876	0.947994	2.41697	O	-	O	-
2081	GYFYIPPLATHTICDRNHTWLPVSDDACYR	P15529	CD46	Membrane cofactor protein	0.978606	0.0242865	3.95232	-	O	O	-
2088	GYNISWELGNEPNSFLK	Q9Y251	HPSE	Heparanase;Heparanase 8 kDa subunit;Heparanase 50 kDa subunit	0.297343	0.847391	3.26911	O	-	O	-
2089	GYNVTYWR	P32004	L1CAM	Neural cell adhesion molecule L1	1.07185	1.24259	2.0734	-	-	O	↑
2090	GYPEAEVFWQDGQGVPLTGNVTTSQMANEQGLFDVHSVLR	Q5ZPR3	CD276	CD276 antigen	2.08118	6.81328	26.8491	O	O	O	↑
2095	GYVEGVHNSSIALSDCFGLR	Q13443	ADAM9	Disintegrin and metalloproteinase domain-containing protein 9	1.52182	0.694429	1.36737	-	-	-	-
2098	GYYNQSEAGSHTLQSMYGCDVGPDGR	Q31610	HLA-B	HLA class I histocompatibility antigen, B-81 alpha chain;HLA class I histocompatibility antigen, B-40 alpha chain;HLA class I histocompatibility antigen, B-48 alpha chain;HLA class I histocompatibility antigen, B-42 alpha chain;HLA class I histocompatibility antigen, B-8 alpha chain;HLA class I histocompatibility antigen, B-7 alpha chain	3.22545	1.4103	1.98453	O	-	-	↑
2099	GYYNQSEAGSHTLQWMYGCDVGPDGR	P30462	HLA-B	HLA class I histocompatibility antigen, B-14 alpha chain	0.449502	2.13391	2.64781	O	O	O	-
2100	GYYNQSEAGSHTVQR	P01892	HLA-A	HLA class I histocompatibility antigen, A-2 alpha chain;HLA class I histocompatibility antigen, A-69 alpha chain	1.13108	0.683825	1.43575	-	-	-	-
2101	GYYNQSEAGSHTWQR	P30488	HLA-B	HLA class I histocompatibility antigen, B-50 alpha chain;HLA class I histocompatibility antigen, B-45 alpha chain;HLA class I histocompatibility antigen, B-41 alpha chain	0.44916	1.25571	2.22484	O	-	O	-
2104	HAVYWNSSNQHLR	P52797	EFNA3	Ephrin-A3	1.03879	0.356062	3.49938	-	O	O	-
2110	HEDCANASLANLTCDQLADR	P48029	SLC6A8	Sodium- and chloride-dependent creatine transporter 1	1.07036	1.27854	1.86749	-	-	-	↑
2111	HEEGHMLNCTCFGQGR	P02751	FN1	Fibronectin;Anastellin;Ugl-Y1;Ugl-Y2;Ugl-Y3	1.25275	2.3651	0.824676	-	O	-	-
2119	HFFNVSDELALVTIVK	P56199	ITGA1	Integrin alpha-1	0.631476	0.252429	4.26132	-	O	O	-
2124	HFNMSIIISNGHGTTQYSTFSYVDPVITSISPK	P08581	MET	Hepatocyte growth factor receptor	1.11582	10.6265	1.28458	-	O	-	↑
2125	HFNTSLVFPR	Q6PKC3	TXNDC11	Thioredoxin domain-containing protein 11	1.23559	0.723518	1.95572	-	-	-	-
2126	HFNYTSLIAFHCK	P11717	IGF2R	Cation-independent mannose-6-phosphate receptor	0.994608	0.769904	3.13508	-	-	O	-
2131	HGAVVNESHHDALVEDIFDK	Q9NWM8	FKBP14	Peptidyl-prolyl cis-trans isomerase FKBP14	0.514877	0.739617	0.539502	-	-	-	↓
2132	HGAVVNESHHDALVEDIFDKEDEDKDGFISAR	Q9NWM8	FKBP14	Peptidyl-prolyl cis-trans isomerase FKBP14	1.55132	0.577983	2.75261	-	-	O	-
2153	HHYEVIPPLTSPGQPGDMNCTTQR	Q9H813	TMEM206	Transmembrane protein 206	1.25675	0.625139	22.6934	-	-	O	-
2163	HIVINGSSFGADGFPYVQVLK	P22455	FGFR4	Fibroblast growth factor receptor 4	1.09013	0.867809	2.03835	-	-	O	-
2168	HLDLSNNSLVSLTYVSFR	Q13641	TPBG	Trophoblast glycoprotein	1.63864	0.527027	1.81756	-	-	-	-
2175	HLITQDGQNSTLTIHNCSQDLDEGYYICR	Q8N0Z9	VSIG10	V-set and immunoglobulin domain-containing protein 10	2.58274	0.871335	1.81945	O	-	-	-
2176	HLLENSTASVSEAER	P42892	ECE1	Endothelin-converting enzyme 1	1.42346	0.724496	2.13081	-	-	O	-
2177	HLLENSTASVSEAERK	P42892	ECE1	Endothelin-converting enzyme 1	0.539352	0.629597	24.8711	-	-	O	-
2183	HLYTTTGGETDFTNVTSLR	Q99523	SORT1	Sortilin	2.03369	0.705076	2.99613	O	-	O	-
2184	HMLALAPNSTAR	Q92508	PIEZO1	Piezo-type mechanosensitive ion channel component 1	2.36444	1.91893	0.167554	O	-	O	-
2188	HNFTASLLTLR	Q24JP5	TMEM132A	Transmembrane protein 132A	1.13958	0.387146	1.84433	-	O	-	-
2194	HNSSSLGNLSVSIVPPSK	O95158	NXPH4	Neurexophilin-4	0.684347	0.881816	1.52003	-	-	-	-
2195	HPDAVAWANLTNAIR	Q8NHP8	PLBD2	Putative phospholipase B-like 2;Putative phospholipase B-like 2 32 kDa form;Putative phospholipase B-like 2 45 kDa form	1.54853	0.687485	2.11829	-	-	O	-
2196	HPEDVQSSNGSVYTWR	O95477	ABCA1	ATP-binding cassette sub-family A member 1	1.0629	1.16151	2.39065	-	-	O	↑
2197	HPGNFSSLSCDYFAVNQSR	P08648	ITGA5	Integrin alpha-5;Integrin alpha-5 heavy chain;Integrin alpha-5 light chain	1.40786	0.89094	1.73231	-	-	-	-
2208	HRPTAGAFNHSDLDAELR	P09758	TACSTD2	Tumor-associated calcium signal transducer 2	0.218484	0.755315	13.2618	O	-	O	-
2209	HRPTAGAFNHSDLDAELRR	P09758	TACSTD2	Tumor-associated calcium signal transducer 2	2.21269	0.821055	3.13855	O	-	O	-
2238	HYQVTGYGINGTGDSNDFWR	Q9UKY4	POMT2	Protein O-mannosyl-transferase 2	0.447947	0.270491	1.57167	O	O	-	-
2245	IADDKYNDTFWK	P14625	HSP90B1	Endoplasmin	0.986985	0.844869	0.0469412	-	-	O	↓
2247	IAENYTAVVSPDIASIDLNTFEFNKPSPYGSNHNR	Q14435	GALNT3	Polypeptide N-acetylgalactosaminyltransferase 3	195.754	0.079456	186.962	O	O	O	-
2261	IAPASNVSHTVVLR	P43308	SSR2	Translocon-associated protein subunit beta	1.61519	0.986369	1.39881	-	-	-	-
2262	IAPASNVSHTVVLRPLK	P43308	SSR2	Translocon-associated protein subunit beta	0.551182	0.801959	80.7953	-	-	O	-
2271	IAVDWESLGYNITR	Q15262	PTPRK	Receptor-type tyrosine-protein phosphatase kappa	1.80813	0.668245	1.50045	-	-	-	-
2273	IAVQFGPGFSWIANFTK	P13473	LAMP2	Lysosome-associated membrane glycoprotein 2	8.01332	0.202431	1.53507	O	O	-	-
2285	IDGGPVILLQAGTPHNLTCR	Q96J84	KIRREL	Kin of IRRE-like protein 1	0.657745	0.716158	72.4292	-	-	O	-
2286	IDGPVISESTPIAETIMASSNESLVVNR	P42167	TMPO	Lamina-associated polypeptide 2, isoforms beta/gamma;Thymopoietin;Thymopentin	2.45224	0.135654	32.3165	O	O	O	-
2294	IDLNSTSHVNITTR	Q86SQ4	GPR126	G-protein coupled receptor 126	1.22357	0.815383	2.32785	-	-	O	-
2296	IDNLTGELSTSER	O60245	PCDH7	Protocadherin-7	2.22823	0.86089	0.9973	O	-	-	-
2300	IDSTGNVTNELR	O75882	ATRN	Attractin	49.8044	1.03025	2.64268	O	-	O	↑
2323	IETILLNGTDR	Q07954	LRP1	Prolow-density lipoprotein receptor-related protein 1;Low-density lipoprotein receptor-related protein 1 85 kDa subunit;Low-density lipoprotein receptor-related protein 1 515 kDa subunit;Low-density lipoprotein receptor-related protein 1 intracellular domain	0.878126	1.11061	1.49485	-	-	-	-
2326	IETVLPAEFFEVLSSSQNGSYHR	Q8TEM1	NUP210	Nuclear pore membrane glycoprotein 210	1.75832	0.822963	2.19619	-	-	O	-
2330	IEVLEEGSFMNLTR	Q9H5Y7	SLITRK6	SLIT and NTRK-like protein 6	18.4852	0.111696	1.97397	O	O	-	-
2338	IFIFNQTGIEAK	Q96J42	TXNDC15	Thioredoxin domain-containing protein 15	1.36756	0.71591	3.05866	-	-	O	-
2341	IFLYSGEPTYLGNETSVFGPTGNK	O75503	CLN5	Ceroid-lipofuscinosis neuronal protein 5	1.35107	0.400438	1.9414	-	O	-	-
2355	IGFIFVVNDSEDVDGMQDAGVAVLR	Q9NYU2	UGGT1	UDP-glucose:glycoprotein glucosyltransferase 1	99.9892	3.35172	2.13258	O	O	O	↑
2366	IGNITPADAGTYYCVK	P78324	SIRPA	Tyrosine-protein phosphatase non-receptor type substrate 1	1.57243	2.19961	11.3829	-	O	O	↑
2370	IGPFANTTK	Q9P273	TENM3	Teneurin-3	1.00905	1.06223	2.00097	-	-	O	↑
2371	IGPGEPLELLCNVSGALPPAGR	Q969P0	IGSF8	Immunoglobulin superfamily member 8	1.05008	0.130969	2.16325	-	O	O	-
2377	IGTFCSNGTVSR	Q9H5V8	CDCP1	CUB domain-containing protein 1	1.12506	0.840751	1.61787	-	-	-	-
2385	IHELPLSLQDLTGLEHMLINCSK	Q3T906	GNPTAB	N-acetylglucosamine-1-phosphotransferase subunits alpha/beta;N-acetylglucosamine-1-phosphotransferase subunit alpha;N-acetylglucosamine-1-phosphotransferase subunit beta	0.0471826	0.847156	1.46013	O	-	-	-
2404	IIFANVSVR	O15321	TM9SF1	Transmembrane 9 superfamily member 1	1.59008	0.921145	1.20347	-	-	-	-
2411	IIISPEENVTLTCTAENQLER	Q13740	ALCAM	CD166 antigen	2.02272	0.766098	2.76983	O	-	O	-
2416	IILNFTSLDLYR	P13497	BMP1	Bone morphogenetic protein 1	1.50285	1.04026	0.681507	-	-	-	-
2433	IITVSTNGSIHSPR	Q9NRA1	PDGFC	Platelet-derived growth factor C;Platelet-derived growth factor C, latent form;Platelet-derived growth factor C, receptor-binding form	0.487644	0.0611735	3.61476	O	O	O	-
2446	ILAPAYFILGGNQSGEGCVITR	Q13510	ASAH1	Acid ceramidase;Acid ceramidase subunit alpha;Acid ceramidase subunit beta	2.25324	0.208823	1.24393	O	O	-	-
2447	ILAPELSHANATR	P51168	SCNN1B	Amiloride-sensitive sodium channel subunit beta	0.672311	0.284983	1.75175	-	O	-	-
2462	ILFWAQNFSVAYK	Q15904	ATP6AP1	V-type proton ATPase subunit S1	1.35886	0.260499	1.9877	-	O	-	-
2465	ILGDKVNNTAVIEK	Q9H330	TMEM245	Transmembrane protein 245	0.744994	5.32581	71.3529	-	O	O	-
2482	ILLQDLSSSAPHLANATLETEWFHGLR	Q5T848	GPR158	Probable G-protein coupled receptor 158	2.13051	1.10213	1.97247	O	-	-	↑
2483	ILLTCSLNDSATEVTGHR	P35613	BSG	Basigin	32.927	0.782656	1.67133	O	-	-	-
2492	ILNQTADMLQLASK	Q9UKU9	ANGPTL2	Angiopoietin-related protein 2	1.68518	1.84382	0.866457	-	-	-	-
2493	ILPGGNTSFDVVFLAR	Q92545	TMEM131	Transmembrane protein 131	2.21653	0.466048	1.63989	O	O	-	-
2496	ILQDFSSDPSSNLSSHSLEK	Q8IXL6	FAM20C	Extracellular serine/threonine protein kinase FAM20C	6.89285	0.31916	3.44834	O	O	O	-
2505	ILTADNQTYMAVQGSTAYLLCK	P32004	L1CAM	Neural cell adhesion molecule L1	10.3682	0.959397	2.08551	O	-	O	-
2513	ILTNNSQTPILSPQEVVSCSQYAQGCEGGFPYLIAGK	P53634	CTSC	Dipeptidyl peptidase 1;Dipeptidyl peptidase 1 exclusion domain chain;Dipeptidyl peptidase 1 heavy chain;Dipeptidyl peptidase 1 light chain	278.204	2.0543	1.67876	O	O	-	↑
2539	INATDADEPNTLNSK	Q14126	DSG2	Desmoglein-2	1.4963	0.150449	0.174343	-	O	O	-
2540	INCSDGYIEYYICR	O14494	PPAP2A	Lipid phosphate phosphohydrolase 1	19.6956	0.735578	3.55389	O	-	O	-
2541	INCSWFIR	Q9Y561	LRP12	Low-density lipoprotein receptor-related protein 12	0.767692	1.35905	0.403265	-	-	O	-
2542	INDSVTLNEKPFSVEDTYLLCPAPILK	Q9H6X2	ANTXR1	Anthrax toxin receptor 1	0.100551	0.604306	16.8853	O	-	O	-
2546	INITEMYK	Q6ZMP0	THSD4	Thrombospondin type-1 domain-containing protein 4	1.09263	1.12818	12.39	-	-	O	↑
2549	INLTANLIHLSENR	O60602	TLR5	Toll-like receptor 5	1.15133	2.24825	1.46927	-	O	-	↑
2555	INSSLQLPDR	Q9NPR2	SEMA4B	Semaphorin-4B	1.32207	0.982923	1.72273	-	-	-	-
2556	INSSLVLEIR	Q92187	ST8SIA4	CMP-N-acetylneuraminate-poly-alpha-2,8-sialyltransferase	3.5291	0.990412	1.42454	O	-	-	-
2557	INSSVTDIEEIIGVR	Q14517	FAT1	Protocadherin Fat 1;Protocadherin Fat 1, nuclear form	2.52485	0.575704	2.63043	O	-	O	-
2560	INTTTNEIFYCTFR	Q9NZQ7	CD274	Programmed cell death 1 ligand 1	0.584105	17.6091	0.953497	-	O	-	-
2561	INYTDPFSNQTVK	Q9H813	TMEM206	Transmembrane protein 206	1.51047	0.838161	2.1492	-	-	O	-
2562	INYTVPQSGTFK	Q6YHK3	CD109	CD109 antigen	3.34406	0.512136	1.33811	O	-	-	-
2563	IPAINQTITEANEK	P11047	LAMC1	Laminin subunit gamma-1	0.0140061	0.756861	0.759015	O	-	-	↓
2564	IPDHDPAPNVTVLLR	Q9P2E9	RRBP1	Ribosome-binding protein 1	0.216464	26.4482	1.18575	O	O	-	-
2568	IPGVPGSMPNASWTGNLR	Q8N0V5	GCNT2	N-acetyllactosaminide beta-1,6-N-acetylglucosaminyl-transferase, isoform A	0.860174	0.739156	0.762918	-	-	-	↓
2575	IPLVNISLLPK	Q3T906	GNPTAB	N-acetylglucosamine-1-phosphotransferase subunits alpha/beta;N-acetylglucosamine-1-phosphotransferase subunit alpha;N-acetylglucosamine-1-phosphotransferase subunit beta	1.44313	1.18132	2.31434	-	-	O	↑
2577	IQAIAQNVSDIAVK	Q3V5L5	MGAT5B	Alpha-1,6-mannosylglycoprotein 6-beta-N-acetylglucosaminyltransferase B	0.294655	1.16833	1.22069	O	-	-	-
2578	IQATSLSGNGSWTDPVFFYVQAK	P08069	IGF1R	Insulin-like growth factor 1 receptor;Insulin-like growth factor 1 receptor alpha chain;Insulin-like growth factor 1 receptor beta chain	2.12461	0.374231	1.93469	O	O	-	-
2590	IQILPNSSLLIR	Q8TD84	DSCAML1	Down syndrome cell adhesion molecule-like protein 1	0.952176	0.937149	2.3743	-	-	O	-
2594	IQQESLGSAPLMGDDHPNASR	Q5JRA6	MIA3	Melanoma inhibitory activity protein 3	1.12303	0.353983	1.33459	-	O	-	-
2595	IQQESLGSAPLMGDDHPNASRDSVEGDALVNGAK	Q5JRA6	MIA3	Melanoma inhibitory activity protein 3	4.4884	0.863669	38.954	O	-	O	-
2613	ISDNNTEFLLNFNEFIDR	P54289	CACNA2D1	Voltage-dependent calcium channel subunit alpha-2/delta-1;Voltage-dependent calcium channel subunit alpha-2-1;Voltage-dependent calcium channel subunit delta-1	3.57118	0.107176	0.522825	O	O	-	-
2634	ISNLTIVQAEIK	Q70UQ0	IKBIP	Inhibitor of nuclear factor kappa-B kinase-interacting protein	1.67203	0.81592	35.7829	-	-	O	-
2645	ITAPTLAPGNSTAVVPTPTPPSK	Q13530	SERINC3	Serine incorporator 3	1.97904	0.0501746	13.9047	-	O	O	-
2650	ITFKPIAPSGQNATCTR	Q96QE2	SLC2A13	Proton myo-inositol cotransporter	0.696213	0.829808	1.76602	-	-	-	-
2651	ITIAINNTLTPTTLPPGTIQYLTDTSK	P08236	GUSB	Beta-glucuronidase	1.16127	1.53013	1.2028	-	-	-	↑
2657	ITNISAVEMTPLPTCLQFNR	Q6UX71	PLXDC2	Plexin domain-containing protein 2	1.39755	0.845924	0.945075	-	-	-	-
2672	IVDVNLTSEGK	Q9HD45	TM9SF3	Transmembrane 9 superfamily member 3	1.37669	0.709931	2.23721	-	-	O	-
2673	IVDVNLTSEGKVK	Q9HD45	TM9SF3	Transmembrane 9 superfamily member 3	0.106454	1.76963	0.0619222	O	-	O	-
2676	IVELFVNISK	O00462	MANBA	Beta-mannosidase	2.96083	0.751763	1.28351	O	-	-	-
2688	IVNETLYENTK	P19075	TSPAN8	Tetraspanin-8	0.329557	0.716108	2.227	O	-	O	-
2691	IVNVTANLISSSFPEANSGNER	Q2MV58	TCTN1	Tectonic-1	1.61362	1.62574	9.62843	-	-	O	↑
2693	IVSPEPGGAVGPNLTCR	Q6UXD5	SEZ6L2	Seizure 6-like protein 2	0.914085	0.784557	1.4757	-	-	-	-
2698	IVTDWQNYTR	Q6AZY7	SCARA3	Scavenger receptor class A member 3	1.804	0.37036	2.05153	-	O	O	-
2699	IVTPEEYYNVTVQ	O75629	CREG1	Protein CREG1	316.421	0.113834	0.0149253	O	O	O	-
2708	IWCLGNETR	Q9HCK4	ROBO2	Roundabout homolog 2	1.76749	0.947337	2.50203	-	-	O	-
2718	IYGPFCECDNFSCAR	P18084	ITGB5	Integrin beta-5	1.46927	1.07956	2.57612	-	-	O	↑
2723	IYLRNESEFR	P08648	ITGA5	Integrin alpha-5;Integrin alpha-5 heavy chain;Integrin alpha-5 light chain	1.00793	0.859399	4.21812	-	-	O	-
2727	IYNVTYLEPSLR	P24394	IL4R	Interleukin-4 receptor subunit alpha;Soluble interleukin-4 receptor subunit alpha	45.6518	12.6464	3.67031	O	O	O	↑
2728	IYNWSGYPLLVQK	Q6P4A8	PLBD1	Phospholipase B-like 1;Phospholipase B-like 1 chain A;Phospholipase B-like 1 chain B;Phospholipase B-like 1 chain C	1.1186	1.02424	2.1006	-	-	O	↑
2731	IYSINVTNVMNGVASYCR	Q6UXG2	KIAA1324	UPF0577 protein KIAA1324	0.963663	1.97219	0.645953	-	-	-	-
2735	IYVLDGTQNDTAFVFPR	Q9NRN5	OLFML3	Olfactomedin-like protein 3	0.760068	0.864537	3.01154	-	-	O	-
2744	KDFEDLYTPVNGSIVIVR	P02786	TFRC	Transferrin receptor protein 1;Transferrin receptor protein 1, serum form	1.57331	0.582407	0.518602	-	-	-	-
2747	KDNITAHNISWR	Q9Y6M7	SLC4A7	Sodium bicarbonate cotransporter 3	0.396227	0.853877	4.73741	O	-	O	-
2751	KDTCTQECSYFNITK	P05556	ITGB1	Integrin beta-1	1.07059	1.13564	100.176	-	-	O	↑
2754	KDVNYTQIVVDR	Q92854	SEMA4D	Semaphorin-4D	1.72836	1.3149	2.01601	-	-	O	↑
2759	KENSSEICSNNGECVCGQCVCR	P05556	ITGB1	Integrin beta-1	2.45956	0.848478	0.982072	O	-	-	-
2764	KFNSTQIAAMAPEHEEPR	Q4G148	GXYLT1	Glucoside xylosyltransferase 1	0.843406	0.979454	23.1237	-	-	O	-
2770	KINSSLQLPDR	Q9NPR2	SEMA4B	Semaphorin-4B	0.931805	1.09615	2.51455	-	-	O	-
2789	KNITDLVEGAK	Q8IWA5	SLC44A2	Choline transporter-like protein 2	0.885829	0.977928	1.75297	-	-	-	-
2790	KNLTLMATTSQLPK	P11117	ACP2	Lysosomal acid phosphatase	0.118044	0.539296	0.835204	O	-	-	↓
2799	KPQDQGLNHTCNYYLQPEEDVTIGVWHTVPAVWWK	Q8N2K0	ABHD12	Monoacylglycerol lipase ABHD12	0.0694106	0.0263501	9.17686	O	O	O	-
2824	KVNGTPSPIPIISWCGSLDSR	Q7Z4H8	KDELC2	KDEL motif-containing protein 2	4.02726	0.0463432	9.09454	O	O	O	-
2837	KYPSCGGLLQSPIDLHSDILQYDASLTPLEFQGYNLSANK	O43570	CA12	Carbonic anhydrase 12	0.719217	0.12012	1.6591	-	O	-	-
2858	LAFAFGDRNCSTITLQNITR	Q14118	DAG1	Dystroglycan;Alpha-dystroglycan;Beta-dystroglycan	1.74279	0.535311	2.87249	-	-	O	-
2859	LAFATMFNSSEQSQK	P19440	GGT1	Gamma-glutamyltranspeptidase 1;Gamma-glutamyltranspeptidase 1 heavy chain;Gamma-glutamyltranspeptidase 1 light chain	0.231952	1.83267	2.06838	O	-	O	-
2877	LALNLTLR	P55268	LAMB2	Laminin subunit beta-2	1.35867	1.11319	1.0629	-	-	-	↑
2882	LANLTQGEDQYYLR	P10909	CLU	Clusterin;Clusterin beta chain;Clusterin alpha chain	1.26997	0.899347	1.82982	-	-	-	-
2883	LANNTHQHVFDDLR	Q99523	SORT1	Sortilin	1.22086	0.670054	2.03242	-	-	O	-
2886	LAPNLTELR	P51805	PLXNA3	Plexin-A3	1.13737	0.319005	2.0375	-	O	O	-
2893	LASPPSQGEVPPGPLPEAVLALYNSTR	P01137	TGFB1	Transforming growth factor beta-1;Latency-associated peptide	40.7549	0.657039	1.27315	O	-	-	-
2900	LATIANFSALGLEPGR	Q9H015	SLC22A4;SLC22A5	Solute carrier family 22 member 4;Solute carrier family 22 member 5	1.74014	0.573236	2.46673	-	-	O	-
2907	LAVTNTTMTGTVLK	Q13586	STIM1	Stromal interaction molecule 1	50.5241	0.545329	7.48395	O	-	O	-
2910	LCDEGHGLEVEINCTR	P25445	FAS	Tumor necrosis factor receptor superfamily member 6	2.06866	0.124085	1.82614	O	O	-	-
2911	LCHTHGWNETSEFMPQGAVFSCLYR	Q92896	GLG1	Golgi apparatus protein 1	1.07482	0.0673233	2.76044	-	O	O	-
2913	LCLELANTSIR	O15455	TLR3	Toll-like receptor 3	0.580674	0.823934	1.22791	-	-	-	-
2920	LDAFFALEGFPTEPNSSSR	P08294	SOD3	Extracellular superoxide dismutase [Cu-Zn]	0.84998	0.751867	2.5029	-	-	O	-
2925	LDFIILNETK	P27487	DPP4	Dipeptidyl peptidase 4;Dipeptidyl peptidase 4 membrane form;Dipeptidyl peptidase 4 soluble form	1.20455	0.464613	3.15163	-	O	O	-
2926	LDFLMFNYSVPSYLK	Q9NPF2	CHST11	Carbohydrate sulfotransferase 11	0.679055	5.30242	8.39541	-	O	O	-
2929	LDGPTEQCPDPLPLPAGNCTDEEGICHR	Q9HC84	MUC5B	Mucin-5B	434.496	0.457407	0.904693	O	O	-	-
2933	LDIGQYLLNVSVTDGK	Q14517	FAT1	Protocadherin Fat 1;Protocadherin Fat 1, nuclear form	0.287593	0.615764	1.13879	O	-	-	-
2939	LDLPVNTSIPNVTEVK	P56199	ITGA1	Integrin alpha-1	1.05995	0.808573	1.36301	-	-	-	-
2940	LDMSQNVSLVTAELSK	Q99808	SLC29A1	Equilibrative nucleoside transporter 1	1.35905	1.00549	1.03548	-	-	-	↑
2942	LDNYSTQELGK	P21589	NT5E	5-nucleotidase	1.30532	0.853167	2.07642	-	-	O	-
2943	LDPEENHTAELVIPELPLAHPPNER	Q9NZQ7	CD274	Programmed cell death 1 ligand 1	0.44016	0.052416	3.34313	O	O	O	-
2948	LDPVSLQTLQTWNTSYPK	Q99784	OLFM1	Noelin	1.43684	0.859369	2.31274	-	-	O	-
2970	LEGMNETVSNLTQR	O75071	EFCAB14	EF-hand calcium-binding domain-containing protein 14	1.40318	2.25097	2.32479	-	O	O	↑
2973	LEHQFAVGEDSGRNLSAPVTLNLR	O00754	MAN2B1	Lysosomal alpha-mannosidase;Lysosomal alpha-mannosidase A peptide;Lysosomal alpha-mannosidase B peptide;Lysosomal alpha-mannosidase C peptide;Lysosomal alpha-mannosidase D peptide;Lysosomal alpha-mannosidase E peptide	3.67565	1.87729	56.204	O	-	O	↑
2980	LELSASAFDDGNFSLLIR	Q9BRK3	MXRA8	Matrix-remodeling-associated protein 8	1.87138	0.103006	0.54567	-	O	-	-
2983	LENITTGTYTIHAQK	Q5JPE7	NOMO2;NOMO1;NOMO3	Nodal modulator 2;Nodal modulator 1;Nodal modulator 3	1.78584	1.25232	2.94711	-	-	O	↑
2985	LENLSSSEMGYTATLTR	P10253	GAA	Lysosomal alpha-glucosidase;76 kDa lysosomal alpha-glucosidase;70 kDa lysosomal alpha-glucosidase	2.41563	1.18103	2.87627	O	-	O	↑
2987	LENWTDASR	Q9P2B2	PTGFRN	Prostaglandin F2 receptor negative regulator	1.26786	0.929483	2.29167	-	-	O	-
2988	LEPGPLPGDDWTIFQSNHSTYEPVLLASLRPAEPAVPGPVLR	P52849	NDST2	Bifunctional heparan sulfate N-deacetylase/N-sulfotransferase 2;Heparan sulfate N-deacetylase 2;Heparan sulfate N-sulfotransferase 2	16.6702	0.39126	2.49995	O	O	O	-
3000	LEVHSNGSVAYFNASQVTGPSIYSFHCEYVSSLSK	Q15904	ATP6AP1	V-type proton ATPase subunit S1	3.17422	0.0577955	29.1253	O	O	O	-
3002	LEWLGNCSGLNDETYGYK	P05026	ATP1B1	Sodium/potassium-transporting ATPase subunit beta-1	1.45872	0.686033	2.3421	-	-	O	-
3006	LFDDWMASNGTQSLPTDVMTTVFK	Q9UIQ6	LNPEP	Leucyl-cystinyl aminopeptidase;Leucyl-cystinyl aminopeptidase, pregnancy serum form	35.0247	15.5404	1.99695	O	O	-	↑
3016	LFGNYSR	Q11206	ST3GAL4	CMP-N-acetylneuraminate-beta-galactosamide-alpha-2,3-sialyltransferase 4	1.46795	0.564228	0.390556	-	-	O	-
3017	LFGPGFANSSWSWVAPEGAGCR	Q8NE01	CNNM3	Metal transporter CNNM3	2.95898	0.0493776	19.0603	O	O	O	-
3030	LFNLTSTFSR	Q495W5	FUT11	Alpha-(1,3)-fucosyltransferase 11	1.73821	0.706837	2.90271	-	-	O	-
3032	LFNVTPQDEQK	O75144	ICOSLG	ICOS ligand	1.13265	0.88304	2.12771	-	-	O	-
3033	LFNVTSTLR	Q9NZQ7	CD274	Programmed cell death 1 ligand 1	1.76614	1.0056	2.06795	-	-	O	↑
3034	LFPATGNSTNLADDGK	Q8IWK6	GPR125	Probable G-protein coupled receptor 125	0.479333	1.6111	3.25261	O	-	O	-
3038	LFQNCSELFK	Q8NBN3	TMEM87A	Transmembrane protein 87A	1.45266	0.733414	2.26373	-	-	O	-
3050	LGAINSTLSNQSK	Q86YB8	ERO1LB	ERO1-like protein beta	1.19524	1.23443	2.66364	-	-	O	↑
3052	LGANGSHIPQTSSVFSIEVYPEDHSELQSVR	Q14118	DAG1	Dystroglycan;Alpha-dystroglycan;Beta-dystroglycan	47.8352	14.1497	139.662	O	O	O	↑
3058	LGDCISEDSYPDGNITWYR	Q13740	ALCAM	CD166 antigen	2.26326	0.7409	3.94739	O	-	O	-
3069	LGFLGNQSQGCLPAR	P49746	THBS3	Thrombospondin-3	3.38933	1.07564	1.35792	O	-	-	↑
3073	LGGFTQENNTIDSGELDIGR	Q9P273	TENM3	Teneurin-3	0.902626	0.931224	2.28343	-	-	O	-
3074	LGGFTQENNTIDSGELDIGRR	Q9P273	TENM3	Teneurin-3	1.23576	0.632659	7.05673	-	-	O	-
3080	LGGWNITGPWAK	P42892	ECE1	Endothelin-converting enzyme 1	1.10504	0.591931	1.82033	-	-	-	-
3110	LGVSSVPSCYLIYPNGSHGLINVVKPLR	Q6ZRP7	QSOX2	Sulfhydryl oxidase 2	1.19416	0.776173	1.51372	-	-	-	-
3115	LHEITNETFR	Q6EMK4	VASN	Vasorin	0.946189	1.79117	1.72429	-	-	-	-
3118	LHGLHLSNITVGGIPGPAGGVAR	Q9HCU4	CELSR2	Cadherin EGF LAG seven-pass G-type receptor 2	1.32079	0.653315	2.31691	-	-	O	-
3119	LHHFNSSHLEIDDMYTPAYGDFDFDEVKFPNASDMFR	Q6NSJ0	KIAA1161	Uncharacterized family 31 glucosidase KIAA1161	3.16038	0.313383	32.8427	O	O	O	-
3126	LHPEALNLSLDELPPALR	Q9BZC7	ABCA2	ATP-binding cassette sub-family A member 2	1.65944	2.59278	1.21167	-	O	-	↑
3131	LHVGYLQPLVAVQVSFAPNNTGK	P54709	ATP1B3	Sodium/potassium-transporting ATPase subunit beta-3	1.81756	0.511675	1.8483	-	-	-	-
3133	LHVTLYNCSFGR	O15031	PLXNB2	Plexin-B2	1.50577	0.725325	2.61317	-	-	O	-
3142	LIASNVTETMGINGSAYR	O15118	NPC1	Niemann-Pick C1 protein	2.6653	1.11311	2.02244	O	-	O	↑
3169	LILISTNGSFIR	Q6UXN9	WDR82	WD repeat-containing protein 82	0.400091	0.547431	0.319303	O	-	O	↓
3202	LLANSSMLGEGQVLR	Q6UXD5	SEZ6L2	Seizure 6-like protein 2	1.18132	1.2865	1.43824	-	-	-	↑
3210	LLDGDLTSDPSYFQNVTGCSNYYNFLR	Q9H3G5	CPVL	Probable serine carboxypeptidase CPVL	1.78658	7.74331	0.060438	-	O	O	-
3219	LLEFDSTNVSDTAAK	Q8WWB7	GLMP	Glycosylated lysosomal membrane protein	1.65565	0.82863	1.57211	-	-	-	-
3220	LLEFDSTNVSDTAAKPLGR	Q8WWB7	GLMP	Glycosylated lysosomal membrane protein	1.76088	0.665334	1.6591	-	-	-	-
3233	LLETVEYNISGAER	P24821	TNC	Tenascin	2.06437	0.41685	0.753302	O	O	-	-
3238	LLFPTNSSSHLVALQGQPLVLECIAEGFPTPTIK	P32004	L1CAM	Neural cell adhesion molecule L1	0.00135715	2.04663	2.22253	O	O	O	-
3242	LLGGGDEEAIRPQMQQILDFETALANITIPQEK	P42892	ECE1	Endothelin-converting enzyme 1	1.64217	0.245127	0.0641903	-	O	O	-
3248	LLIAGTNSSDLQQILSLLESNK	P08195	SLC3A2	4F2 cell-surface antigen heavy chain	3.31176	0.630252	1.15133	O	-	-	-
3276	LLLSINVTNTR	P26006	ITGA3	Integrin alpha-3;Integrin alpha-3 heavy chain;Integrin alpha-3 light chain	2.2771	0.682996	1.30667	O	-	-	-
3283	LLNATHQIGCQSSISGDTGVIHVVEK	Q92542	NCSTN	Nicastrin	260.168	0.915099	0.950659	O	-	-	-
3284	LLNCTAPGPDAAAR	Q8N697	SLC15A4	Solute carrier family 15 member 4	1.36993	0.138178	2.42738	-	O	O	-
3286	LLNETVDVTINVSNFTVSR	Q86SJ2	AMIGO2	Amphoterin-induced protein 2	22.0606	1.11038	2.83196	O	-	O	↑
3292	LLPAFNTTSGLPYPR	Q9BZQ6	EDEM3	ER degradation-enhancing alpha-mannosidase-like protein 3	1.87579	0.824219	2.247	-	-	O	-
3293	LLPVQFLCPNISVAYR	P07949	RET	Proto-oncogene tyrosine-protein kinase receptor Ret;Soluble RET kinase fragment;Extracellular cell-membrane anchored RET cadherin 120 kDa fragment	1.69643	0.652161	2.03228	-	-	O	-
3314	LLTSHGMGIQVPLNATEFNYLCPAIINQIDAR	Q13433	SLC39A6	Zinc transporter ZIP6	104.488	1.83248	0.801348	O	-	-	-
3329	LMAVNVTYSSTGQIASIQR	Q9P273	TENM3	Teneurin-3	1.24186	2.08486	1.99515	-	O	-	↑
3331	LMLLHPSPNCSLR	Q12770	SCAP	Sterol regulatory element-binding protein cleavage-activating protein	1.21251	2.20106	6.90863	-	O	O	↑
3336	LNASIADLQSQLR	O15230	LAMA5	Laminin subunit alpha-5	0.960928	0.681507	2.25887	-	-	O	-
3337	LNASLPALLLIR	Q15904	ATP6AP1	V-type proton ATPase subunit S1	1.35839	1.03969	1.99834	-	-	-	↑
3338	LNATADILR	P15018	LIF	Leukemia inhibitory factor	2.77502	0.754791	5.30517	O	-	O	-
3346	LNDTYVNVGLYSTK	O14524	TMEM194A	Transmembrane protein 194A	1.56331	0.822878	2.32414	-	-	O	-
3350	LNETHIFNGSNWIMLIYK	P20645	M6PR	Cation-dependent mannose-6-phosphate receptor	1.95789	0.596234	1.79241	-	-	-	-
3352	LNFSESHLVIITK	Q7Z7M9	GALNT5	Polypeptide N-acetylgalactosaminyltransferase 5	0.515234	0.68475	1.246	-	-	-	-
3353	LNFTGPGDPDSIR	P05107	ITGB2	Integrin beta-2	3.18921	1.35454	6.12581	O	-	O	↑
3354	LNGSITSPGWPK	P13497	BMP1	Bone morphogenetic protein 1	4.40151	0.977081	6.31289	O	-	O	-
3355	LNGSLATFSTDQELR	P98153	DGCR2	Integral membrane protein DGCR2/IDD	1.67087	0.946484	2.32334	-	-	O	-
3356	LNGSSLHLEWSAPLESGGR	P54760	EPHB4	Ephrin type-B receptor 4	1.45186	9.22725	1.60982	-	O	-	↑
3357	LNGTDPIVAADSK	Q07954	LRP1	Prolow-density lipoprotein receptor-related protein 1;Low-density lipoprotein receptor-related protein 1 85 kDa subunit;Low-density lipoprotein receptor-related protein 1 515 kDa subunit;Low-density lipoprotein receptor-related protein 1 intracellular domain	0.0991599	0.268455	32.7881	O	O	O	-
3358	LNHSYTGMWAPER	P43115	PTGER3	Prostaglandin E2 receptor EP3 subtype	0.59704	1.10183	2.48527	-	-	O	-
3362	LNITQEGPK	Q5NDL2	EOGT	EGF domain-specific O-linked N-acetylglucosamine transferase	1.19036	0.801764	1.9855	-	-	-	-
3372	LNLSENYTLSISNAR	Q13740	ALCAM	CD166 antigen	1.57582	0.56552	1.27952	-	-	-	-
3382	LNQTEPVAGNYYPVNTR	O00754	MAN2B1	Lysosomal alpha-mannosidase;Lysosomal alpha-mannosidase A peptide;Lysosomal alpha-mannosidase B peptide;Lysosomal alpha-mannosidase C peptide;Lysosomal alpha-mannosidase D peptide;Lysosomal alpha-mannosidase E peptide	4.98122	0.84792	6.79418	O	-	O	-
3385	LNSSQEDPGTVYQCVVR	Q68D85	NCR3LG1	Natural cytotoxicity triggering receptor 3 ligand 1	1.49547	0.134348	1.49278	-	O	-	-
3387	LNTSAGNVDIYK	O15393	TMPRSS2	Transmembrane protease serine 2;Transmembrane protease serine 2 non-catalytic chain;Transmembrane protease serine 2 catalytic chain	1.13163	1.20118	1.49443	-	-	-	↑
3388	LNTTGVSAGCTADLLVGR	O15230	LAMA5	Laminin subunit alpha-5	1.10527	0.82797	1.59041	-	-	-	-
3389	LNTTTANTATVEVLAPSAR	Q58EX2	SDK2	Protein sidekick-2	0.886013	0.999203	2.3692	-	-	O	-
3395	LNVSHTGVPLGEEYILVFSR	Q8NAT1	POMGNT2	Protein O-linked-mannose beta-1,4-N-acetylglucosaminyltransferase 2	11.8993	0.741182	1.43963	O	-	-	-
3396	LNVTTAWK	Q9BZM5	ULBP2;RAET1G	NKG2D ligand 2;Retinoic acid early transcript 1G protein	1.00626	0.94783	1.53007	-	-	-	-
3399	LNWTSLLPASFTK	Q6PIU2	NCEH1	Neutral cholesterol ester hydrolase 1	1.58876	0.733745	1.7411	-	-	-	-
3402	LPADCIDCTTNFSCTYGK	Q9BRN9	TM2D3	TM2 domain-containing protein 3	7.69169	0.261721	0.961261	O	O	-	-
3410	LPLNFTHQTPPWR	Q76KP1	B4GALNT4	N-acetyl-beta-glucosaminyl-glycoprotein 4-beta-N-acetylgalactosaminyltransferase 1	1.29621	0.522916	0.855595	-	-	-	-
3414	LPNSTIYVVEPGYLGFTVHPGDR	Q8TEM1	NUP210	Nuclear pore membrane glycoprotein 210	1.36169	0.719467	2.21576	-	-	O	-
3415	LPPGNLSALLPGNFTVGVPYR	Q6UWB1	IL27RA	Interleukin-27 receptor subunit alpha	1.1162	0.740951	1.07096	-	-	-	-
3417	LPSGMLVISNATEGDGGLYR	Q92859	NEO1	Neogenin	2.31466	1.08606	12.0779	O	-	O	↑
3421	LPTTVLNATAK	Q9GZM5	YIPF3	Protein YIPF3;Protein YIPF3, 36 kDa form III	1.78213	0.373894	2.14667	-	O	O	-
3430	LQDFLVDNETFSGFLYHNLSLPK	O95477	ABCA1	ATP-binding cassette sub-family A member 1	7.6116	0.70794	0.969693	O	-	-	-
3434	LQFDDNGTYTCQVK	O60487	MPZL2	Myelin protein zero-like protein 2	0.271703	1.62023	3.48848	O	-	O	-
3436	LQFQVLVQHPQNESNK	Q9H5V8	CDCP1	CUB domain-containing protein 1	2.71848	0.519376	1.70114	O	-	-	-
3441	LQGVPHVGANVTLSCQSPR	Q96AP7	ESAM	Endothelial cell-selective adhesion molecule	2.82373	0.693732	1.61418	O	-	-	-
3452	LQLQALQQNGSSVLSEDK	Q9BYF1	ACE2	Angiotensin-converting enzyme 2;Processed angiotensin-converting enzyme 2	0.681979	0.581943	0.586417	-	-	-	↓
3460	LQNETAANEVLESIQSYFK	O75355	ENTPD3	Ectonucleoside triphosphate diphosphohydrolase 3	1.29307	0.0958851	1.84178	-	O	-	-
3461	LQNMTVDECFQSR	Q9P1W3	TMEM63C	Calcium permeable stress-gated cation channel 1	0.922167	0.474457	1.96074	-	O	-	-
3465	LQQDVLQFQKNQTNLER	Q8NBJ4	GOLM1	Golgi membrane protein 1	2.30601	0.801014	1.16716	O	-	-	-
3466	LQQHTHEKPCNTSFSYLVASAIPSQDLYFGSFCPGGSIK	Q9H5V8	CDCP1	CUB domain-containing protein 1	4.22017	0.291597	3.19718	O	O	O	-
3468	LQQLHLNTSSLLCDCQLK	Q6UXM1	LRIG3	Leucine-rich repeats and immunoglobulin-like domains protein 3	3.4438	0.715736	23.3314	O	-	O	-
3475	LQVNISGLK	Q12913	PTPRJ	Receptor-type tyrosine-protein phosphatase eta	2.36411	1.21668	1.29406	O	-	-	↑
3480	LRANQSWEDSNTDLVPAPAVR	Q99988	GDF15	Growth/differentiation factor 15	8.38145	1.90541	1.59704	O	-	-	↑
3485	LRNATASLWSGPGLEDR	Q13751	LAMB3	Laminin subunit beta-3	1.24384	0.245424	0.509516	-	O	-	-
3487	LRNSSLGDAINK	Q11206	ST3GAL4	CMP-N-acetylneuraminate-beta-galactosamide-alpha-2,3-sialyltransferase 4	1.34118	0.730168	1.65967	-	-	-	-
3489	LRPIIISMNYSLPLR	P26006	ITGA3	Integrin alpha-3;Integrin alpha-3 heavy chain;Integrin alpha-3 light chain	1.45347	1.0542	1.50964	-	-	-	↑
3492	LRQIFNGTFVK	P18124	RPL7	60S ribosomal protein L7	0.344243	0.565402	0.927038	O	-	-	↓
3502	LSESHALFAINSSTGALYTTSTIDR	Q6V0I7	FAT4	Protocadherin Fat 4	0.469534	8.57151	0.277604	O	O	O	-
3505	LSFGSNSSDFK	Q6UWU2	GLB1L	Beta-galactosidase-1-like protein	0.706764	2.93437	1.58052	-	O	-	-
3506	LSGNLTLLR	Q9UIW2	PLXNA1	Plexin-A1	1.41893	0.778895	1.895	-	-	-	-
3509	LSHDANETLPLHLYVK	O15031	PLXNB2	Plexin-B2	176.436	0.316944	2.15906	O	O	O	-
3514	LSITNETFR	Q9BX74	TM2D1	TM2 domain-containing protein 1	1.3704	0.908243	2.17076	-	-	O	-
3523	LSNISHLNYCEPDLR	Q9NY97	B3GNT2	N-acetyllactosaminide beta-1,3-N-acetylglucosaminyltransferase 2	145.603	0.70966	0.104916	O	-	O	-
3524	LSNLTEGMLR	Q5R3F8	ELFN2	Protein phosphatase 1 regulatory subunit 29	1.62417	0.954753	1.6689	-	-	-	-
3527	LSPPSSSAASSYSFSDLNSTR	P50402	EMD	Emerin	25.4254	9.49916	5.98479	O	O	O	↑
3529	LSPYVNYSFR	Q92823	NRCAM	Neuronal cell adhesion molecule	1.30985	1.1433	0.977047	-	-	-	-
3530	LSQAQGNLSVLETR	O75054	IGSF3	Immunoglobulin superfamily member 3	1.28824	1.04091	2.4294	-	-	O	↑
3531	LSQDFMILWLHGENGTGPAK	Q5JS37	NHLRC3	NHL repeat-containing protein 3	0.852635	1.74442	66.6439	-	-	O	-
3550	LTDVETQVLNQTSR	Q15389	ANGPT1	Angiopoietin-1	3.57911	0.925753	2.9233	O	-	O	-
3556	LTGNLTIQVAHK	O75051	PLXNA2	Plexin-A2	1.00139	0.590169	1.79863	-	-	-	-
3562	LTIHNITPGDAGEYVCK	Q8IZF2	GPR116	Probable G-protein coupled receptor 116	0.907016	0.818101	1.4208	-	-	-	-
3565	LTIVNSSVLDRPR	Q92673	SORL1	Sortilin-related receptor	1.03771	0.8036	1.94639	-	-	-	-
3573	LTLQPVDNSTISLQMGTNK	Q15417	CNN3	Calponin-3	8.38203	0.126285	4.66604	O	O	O	-
3581	LTNVTFPTGVVTNLHGDMDK	Q9P273	TENM3	Teneurin-3	0.721965	0.34683	2.34925	-	O	O	-
3586	LTQVPDDLPTNITVLNLTHNQLR	O15455	TLR3	Toll-like receptor 3	1.02811	0.105141	1.45932	-	O	-	-
3588	LTSCATNASICGDEAR	Q07954	LRP1	Prolow-density lipoprotein receptor-related protein 1;Low-density lipoprotein receptor-related protein 1 85 kDa subunit;Low-density lipoprotein receptor-related protein 1 515 kDa subunit;Low-density lipoprotein receptor-related protein 1 intracellular domain	0.0658123	1.00017	2.0558	O	-	O	-
3590	LTSPPEDYPEPEEVPPEVISIYNSTR	P61812	TGFB2	Transforming growth factor beta-2;Latency-associated peptide	2.30777	0.0142989	0.683683	O	O	-	-
3591	LTSPPEPTVMTHVPYQVLALYNSTR	P10600	TGFB3	Transforming growth factor beta-3;Latency-associated peptide	4.98019	0.340022	3.43379	O	O	O	-
3596	LTVLQASPQDTGNYSCHVEEWLPSPQK	O75054	IGSF3	Immunoglobulin superfamily member 3	4.97329	0.283761	2.96905	O	O	O	-
3597	LTVNLTNDR	P40189	IL6ST	Interleukin-6 receptor subunit beta	1.85253	1.11199	2.34518	-	-	O	↑
3607	LVALAVIDEKNTSVEHTR	Q96JJ7	TMX3	Protein disulfide-isomerase TMX3	0.848508	0.71368	1.85884	-	-	-	-
3610	LVANESVPFETSCR	Q9NXG6	P4HTM	Transmembrane prolyl 4-hydroxylase	39.2957	0.855476	2.17799	O	-	O	-
3619	LVEEGTNVTICYVSR	Q99650	OSMR	Oncostatin-M-specific receptor subunit beta	1.95545	0.081571	3.22769	-	O	O	-
3627	LVGGPVAGGDPNQTIR	O15230	LAMA5	Laminin subunit alpha-5	1.43306	2.1084	73.4912	-	O	O	↑
3633	LVIHSLDYSDQGNYSCVASTELDVVESR	P32004	L1CAM	Neural cell adhesion molecule L1	2.00361	0.131242	2.28723	O	O	O	-
3660	LVQLFPNDTSLK	Q12797	ASPH	Aspartyl/asparaginyl beta-hydroxylase	1.72273	0.990686	2.65038	-	-	O	-
3671	LVSNASMLVSMHGAQLVTTLFLPR	Q8NAT1	POMGNT2	Protein O-linked-mannose beta-1,4-N-acetylglucosaminyltransferase 2	2.57737	0.847391	0.125217	O	-	O	-
3673	LVTDGTLDREQTPEYNVTITATDR	Q9Y5G0	PCDHGB5	Protocadherin gamma-B5	1.24859	0.812112	11.8638	-	-	O	-
3690	LWLPVNLTWADLEDR	Q96G23	CERS2	Ceramide synthase 2	7.18108	21.4135	264.111	O	O	O	↑
3691	LWLPVNLTWADLEDRDGR	Q96G23	CERS2	Ceramide synthase 2	1.92652	0.51853	3.81399	-	-	O	-
3692	LWNSTFLEEYSK	P23229	ITGA6	Integrin alpha-6;Integrin alpha-6 heavy chain;Integrin alpha-6 light chain;Processed integrin alpha-6	1.25475	0.853936	1.98014	-	-	-	-
3695	LYANHTSLPASAR	Q9NRB3	CHST12	Carbohydrate sulfotransferase 12	1.25475	1.19305	2.61843	-	-	O	↑
3705	LYGYSLGNISSNLISFTEVDDAETLHK	Q6P4Q7	CNNM4	Metal transporter CNNM4	1.54542	6.9331	311.373	-	O	O	↑
3716	LYQLSGANLSLEAEAAVGPVPDSPLCHAPQLPQASCEHPR	Q9Y4D7	PLXND1	Plexin-D1	89.1214	2.04387	1.60081	O	O	-	↑
3721	LYWISSGNHTINR	Q07954	LRP1	Prolow-density lipoprotein receptor-related protein 1;Low-density lipoprotein receptor-related protein 1 85 kDa subunit;Low-density lipoprotein receptor-related protein 1 515 kDa subunit;Low-density lipoprotein receptor-related protein 1 intracellular domain	0.557483	0.581197	14.6568	-	-	O	-
3735	MATPLLMQALPMGALPQGPMQNATK	P04233	CD74	HLA class II histocompatibility antigen gamma chain	1.21403	34.2849	1.35792	-	O	-	↑
3738	MAVTFIGNSTAIQELFKR	P07437	TUBB	Tubulin beta chain	0.0193034	0.512776	0.140369	O	-	O	↓
3743	MDGCTLTDEQLLYSFNLSSLSTSTFK	P11717	IGF2R	Cation-independent mannose-6-phosphate receptor	33.7871	28.2162	1.77215	O	O	-	↑
3750	MELSMGPIQANHTGTGLLLTLQPEQK	P04062	GBA	Glucosylceramidase	1.80188	3.60838	2.39629	-	O	O	↑
3751	MEMPSTPQQLQNLTEDIR	P07942	LAMB1	Laminin subunit beta-1	0.416128	0.706519	1.97096	O	-	-	-
3753	MESGLLRPAPVSEVIVLHYNYTGK	Q9H228	S1PR5	Sphingosine 1-phosphate receptor 5	0.607055	0.5958	15.7874	-	-	O	-
3761	MGHNYTFTVQAR	Q92673	SORL1	Sortilin-related receptor	0.667991	0.188365	2.43547	-	O	O	-
3765	MHIFQNGSLVIHDVAPEDSGR	Q13308	PTK7	Inactive tyrosine-protein kinase 7	0.418906	1.58683	2.12138	O	-	O	-
3766	MHLNGSNVQVLHR	Q07954	LRP1	Prolow-density lipoprotein receptor-related protein 1;Low-density lipoprotein receptor-related protein 1 85 kDa subunit;Low-density lipoprotein receptor-related protein 1 515 kDa subunit;Low-density lipoprotein receptor-related protein 1 intracellular domain	0.729156	0.854262	16.1471	-	-	O	-
3782	MLEAYNLTEK	Q99715	COL12A1	Collagen alpha-1(XII) chain	1.80876	1.16437	3.79763	-	-	O	↑
3792	MLNTSSLLEQLNEQFNWVSR	P10909	CLU	Clusterin;Clusterin beta chain;Clusterin alpha chain	0.287433	1.13257	0.0662608	O	-	O	-
3795	MLSAFNATSGK	A2RU67	KIAA1467	Uncharacterized protein KIAA1467	25.4801	2.27072	1.40873	O	O	-	↑
3804	MMQYNVSIK	Q99650	OSMR	Oncostatin-M-specific receptor subunit beta	0.182403	0.473554	0.919423	O	O	-	↓
3805	MNASFSLK	P22413	ENPP1	Ectonucleotide pyrophosphatase/phosphodiesterase family member 1;Alkaline phosphodiesterase I;Nucleotide pyrophosphatase	1.55973	0.754582	2.2304	-	-	O	-
3806	MNITSIAPLLEK	Q96PB1	CASD1	CAS1 domain-containing protein 1	10.9321	0.686247	15.583	O	-	O	-
3807	MNMSVLTLQEYEFEK	Q9H5J4	ELOVL6	Elongation of very long chain fatty acids protein 6	3.42547	2.24156	0.926588	O	O	-	-
3811	MNSTLFSQVENHSVHSNFSEK	P25929	NPY1R	Neuropeptide Y receptor type 1	0.240799	0.197702	2.20335	O	O	O	-
3824	MSLVMPAMAPNETLSGR	Q99941	ATF6B	Cyclic AMP-dependent transcription factor ATF-6 beta;Processed cyclic AMP-dependent transcription factor ATF-6 beta	0.450063	1.02041	3.44141	O	-	O	-
3826	MSNITFLNFDPPIEEFHQYYQHIVTTLVK	Q9UHG3	PCYOX1	Prenylcysteine oxidase 1	0.0199192	0.0382486	1.0657	O	O	-	-
3829	MSVCTDNVTDLR	Q6UXG2	KIAA1324	UPF0577 protein KIAA1324	2.62188	1.14746	2.32366	O	-	O	↑
3830	MSVCTDNVTDLRIPEGESGFSK	Q6UXG2	KIAA1324	UPF0577 protein KIAA1324	0.086906	0.320612	16.4088	O	O	O	-
3839	MTLTQPWDPLDIPQNSTFEDQYSIGGPQEQITVQEWSDR	Q9UM22	EPDR1	Mammalian ependymin-related protein 1	2.25934	14.8965	0.708972	O	O	-	-
3842	MVLWNDSVVR	Q9Y487	ATP6V0A2	V-type proton ATPase 116 kDa subunit a isoform 2	1.5174	1.12693	2.62369	-	-	O	↑
3847	MWDNLTCWPATPR	P32241	VIPR1	Vasoactive intestinal polypeptide receptor 1	1.2853	0.65004	2.00361	-	-	O	-
3853	MYNGSVPFEER	P22413	ENPP1	Ectonucleotide pyrophosphatase/phosphodiesterase family member 1;Alkaline phosphodiesterase I;Nucleotide pyrophosphatase	1.65004	1.04409	2.5149	-	-	O	↑
3854	MYSEGSDIVPQSNETALHYFK	Q9UBV2	SEL1L	Protein sel-1 homolog 1	1.33774	1.18731	2.55886	-	-	O	↑
3862	NASAVVLYNEER	Q8NC42	RNF149	E3 ubiquitin-protein ligase RNF149	1.54157	0.820713	2.32044	-	-	O	-
3863	NASEIEVPFVTR	P07093	SERPINE2	Glia-derived nexin	1.44995	0.766762	0.939262	-	-	-	-
3864	NASHLVCSACFGPCAR	Q96HD1	CRELD1	Cysteine-rich with EGF-like domain protein 1	0.973734	3.50132	1.82235	-	O	-	-
3865	NASLEVALLR	Q9HCK4	ROBO2	Roundabout homolog 2	3.88012	0.524549	2.28596	O	-	O	-
3866	NATALYHVEAFK	Q9UNW1	MINPP1	Multiple inositol polyphosphate phosphatase 1	2.21453	0.22188	2.48527	O	O	O	-
3867	NATASLWSGPGLEDR	Q13751	LAMB3	Laminin subunit beta-3	3.79263	3.23575	0.523188	O	O	-	-
3869	NATTPLWR	O75954	TSPAN9	Tetraspanin-9	0.952572	0.825763	2.37891	-	-	O	-
3870	NATVVWMK	Q13740	ALCAM	CD166 antigen	1.65164	0.901938	1.43117	-	-	-	-
3871	NATYGHYAPGEEFHDVEDAETYK	Q96D15	RCN3	Reticulocalbin-3	1.73953	0.0517338	2.20733	-	O	O	-
3872	NATYGYVLDDPDPDDGFNYK	O43852	CALU	Calumenin	1.41962	0.871788	2.94466	-	-	O	-
3883	NCSAAPQPEPAAGLASYPELR	O75718	CRTAP	Cartilage-associated protein	1.84191	0.780029	2.47289	-	-	O	-
3884	NCSFEDDNIR	Q4G148	GXYLT1	Glucoside xylosyltransferase 1	6.413	1.01227	24.0106	O	-	O	↑
3885	NCSTITLQNITR	Q14118	DAG1	Dystroglycan;Alpha-dystroglycan;Beta-dystroglycan	1.90422	1.20957	0.973127	-	-	-	-
3886	NCTEPALHEFPNDIFTNEDRR	Q9HC58	SLC24A3	Sodium/potassium/calcium exchanger 3	0.548894	1.93355	9.45843	-	-	O	-
3887	NCTLSIHPVHLNDSGQLGLR	P20273	CD22	B-cell receptor CD22	1.8954	0.823934	0.8461	-	-	-	-
3888	NCTNISCSDSLSYASEDALK	P54849	EMP1	Epithelial membrane protein 1	0.483404	16.1998	0.567818	O	O	-	-
3889	NCTQSLQCWK	P46531	NOTCH1	Neurogenic locus notch homolog protein 1;Notch 1 extracellular truncation;Notch 1 intracellular domain	1.10397	0.352452	2.21776	-	O	O	-
3890	NCTSISGDLHILPVAFR	P00533	EGFR	Epidermal growth factor receptor	0.273517	0.821396	2.1792	O	-	O	-
3891	NCTSYGVLDISK	P16671	CD36	Platelet glycoprotein 4	1.47406	0.0581027	1.60403	-	O	-	-
3905	NESCGGTFGIYGTCDR	Q9NZV1	CRIM1	Cysteine-rich motor neuron 1 protein;Processed cysteine-rich motor neuron 1 protein	1.80463	0.30848	2.76236	-	O	O	-
3906	NESDKAPWPLSLPGCPHR	P11117	ACP2	Lysosomal acid phosphatase	0.680516	0.823905	1.83058	-	-	-	-
3908	NESLETYPVMK	P05026	ATP1B1	Sodium/potassium-transporting ATPase subunit beta-1	2.82804	1.15261	2.26028	O	-	O	↑
3909	NETIWYLK	O15342	ATP6V0E1	V-type proton ATPase subunit e 1	1.48792	0.916591	1.99377	-	-	-	-
3910	NETIWYVR	Q8NHE4	ATP6V0E2	V-type proton ATPase subunit e 2	2.02581	1.3396	1.30152	O	-	-	↑
3911	NETTYENGQVTLVCDAEGEPIPEITWK	O15394	NCAM2	Neural cell adhesion molecule 2	0.21856	0.665518	0.00589865	O	-	O	↓
3928	NFSGPDKDVFFDDR	Q8IWF2	FOXRED2	FAD-dependent oxidoreductase domain-containing protein 2	1.97986	0.524549	2.61317	-	-	O	-
3929	NFSIQVR	P05106	ITGB3	Integrin beta-3	0.647207	2.0871	0.382253	-	O	O	-
3930	NFSSCSAEDFEK	Q13443	ADAM9	Disintegrin and metalloproteinase domain-containing protein 9	2.08334	0.92156	2.25433	O	-	O	-
3931	NFSSPILAR	Q9NQ25	SLAMF7	SLAM family member 7	0.636089	1.06396	0.915416	-	-	-	-
3932	NFTAADWGQSR	P12109	COL6A1	Collagen alpha-1(VI) chain	1.43654	0.992508	1.3383	-	-	-	-
3933	NFTALIPGTTVEILDGDSK	P18084	ITGB5	Integrin beta-5	1.53762	0.840052	2.6885	-	-	O	-
3934	NFTLTVTDFYR	O43909	EXTL3	Exostosin-like 3	0.552329	0.560214	1.73953	-	-	-	-
3935	NFTSVHLSYVELK	Q9UHN6	TMEM2	Transmembrane protein 2	0.115487	0.232177	0.648779	O	O	-	↓
3946	NGSFSGLSLLER	Q8IWK6	GPR125	Probable G-protein coupled receptor 125	1.71036	0.240482	2.85008	-	O	O	-
3947	NGSGAVFPVAGADVQTLR	O00391	QSOX1	Sulfhydryl oxidase 1	1.44543	0.791137	1.44764	-	-	-	-
3949	NGSQAFVHWQEPR	P30530	AXL	Tyrosine-protein kinase receptor UFO	2.53292	0.138432	1.17202	O	O	-	-
3950	NGSSIVDLSPLIHR	P11717	IGF2R	Cation-independent mannose-6-phosphate receptor	1.57047	0.919263	2.41848	-	-	O	-
3951	NGSTEIYGECGVCPR	Q9P055	JKAMP	JNK1/MAPK8-associated membrane protein	0.778301	0.987601	1.71143	-	-	-	-
3953	NGTNDGDYVFLTGEDSYLNFTK	Q14108	SCARB2	Lysosome membrane protein 2	4.57414	0.513576	1.69466	O	-	-	-
3954	NGTQLQNFTLDR	Q8WXI7	MUC16	Mucin-16	1.77166	0.660738	1.23285	-	-	-	-
3955	NGTSFDIHYGSGSLSGYLSQDTVSVPCQSASSASALGGVK	P07339	CTSD	Cathepsin D;Cathepsin D light chain;Cathepsin D heavy chain	365.544	0.0358086	0.662917	O	O	-	-
3966	NHSALITSVVPGDYDGDSQMDVLLTYLPK	Q8TB96	ITFG1	T-cell immunomodulatory protein	1626.55	3.64104	76.104	O	O	O	↑
3967	NHSCSEGQISIFR	O75882	ATRN	Attractin	2.28754	0.314766	20.3803	O	O	O	-
3968	NHSIFLADINQER	P50897	PPT1	Palmitoyl-protein thioesterase 1	1.35642	0.783905	2.22129	-	-	O	-
3969	NHSSYLGYSVAAISTGESTHFVAGAPR	P17301	ITGA2	Integrin alpha-2	1.50629	0.850805	1.75674	-	-	-	-
3970	NHTWLPVSDDACYR	P15529	CD46	Membrane cofactor protein	1.59317	0.705858	0.910544	-	-	-	-
3971	NHTYNTYIGQGYIIPGMDQGLQGACMGER	Q96AY3	FKBP10	Peptidyl-prolyl cis-trans isomerase FKBP10	3.602	0.857109	0.676471	O	-	-	-
3995	NISDISENLK	Q6P179	ERAP2	Endoplasmic reticulum aminopeptidase 2	0.779489	0.794958	1.77092	-	-	-	-
3997	NISGALEAFR	Q96AE7	TTC17	Tetratricopeptide repeat protein 17	1.10282	0.54301	2.54665	-	-	O	-
3998	NISGHIYNQNVSQK	Q9P0T7	TMEM9	Transmembrane protein 9	0.0723582	16.2324	0.0626735	O	O	O	-
3999	NISGVVLADHSGAFHNK	Q92542	NCSTN	Nicastrin	1.36708	0.815242	2.23767	-	-	O	-
4000	NISIHQAYQQCK	Q8N271	PROM2	Prominin-2	1.42969	0.44074	1.70598	-	O	-	-
4002	NISQVLEK	O14672	ADAM10	Disintegrin and metalloproteinase domain-containing protein 10	1.80939	0.869314	2.18192	-	-	O	-
4003	NISSHTNIVFSNGELDPWSGGGVTK	P42785	PRCP	Lysosomal Pro-X carboxypeptidase	4.45183	0.33981	1.22876	O	O	-	-
4004	NISTAEQPYLFTR	Q9Y2C2	UST	Uronyl 2-sulfotransferase	1.61563	0.782493	1.97096	-	-	-	-
4005	NITAQLPTK	Q04771	ACVR1	Activin receptor type-1	1.87358	0.978809	1.1456	-	-	-	-
4006	NITDLVEGAK	Q8IWA5	SLC44A2	Choline transporter-like protein 2	1.52404	0.854765	2.00028	-	-	O	-
4007	NITGLENFTLK	Q96J42	TXNDC15	Thioredoxin domain-containing protein 15	1.43853	0.610071	2.41798	-	-	O	-
4008	NITIVTGAPR	P26006	ITGA3	Integrin alpha-3;Integrin alpha-3 heavy chain;Integrin alpha-3 light chain	324.416	0.671635	58.1296	O	-	O	-
4009	NITLAYTLEADR	P26006	ITGA3	Integrin alpha-3;Integrin alpha-3 heavy chain;Integrin alpha-3 light chain	1.9711	0.846775	0.766894	-	-	-	-
4010	NITLAYTLEADRDR	P26006	ITGA3	Integrin alpha-3;Integrin alpha-3 heavy chain;Integrin alpha-3 light chain	1.88074	0.673804	1.73604	-	-	-	-
4011	NITLPGVK	Q6ZNA5	FRRS1	Ferric-chelate reductase 1	0.633361	1.32322	1.87553	-	-	-	-
4012	NITLTWR	Q29980	MICB	MHC class I polypeptide-related sequence B	1.70681	0.749812	2.59116	-	-	O	-
4013	NITQIVGHSGCEAK	P41271	NBL1	Neuroblastoma suppressor of tumorigenicity 1	18.2358	0.559729	1.14496	O	-	-	-
4014	NITVVAGTDLVLPCHLSSNLAHAR	Q9C0C4	SEMA4C	Semaphorin-4C	0.916305	0.324795	1.46785	-	O	-	-
4059	NLSAPVTLNLR	O00754	MAN2B1	Lysosomal alpha-mannosidase;Lysosomal alpha-mannosidase A peptide;Lysosomal alpha-mannosidase B peptide;Lysosomal alpha-mannosidase C peptide;Lysosomal alpha-mannosidase D peptide;Lysosomal alpha-mannosidase E peptide	1.56049	5.58226	2.7448	-	O	O	↑
4060	NLSASVIAVTIQGGAHHLDLR	Q9UHL4	DPP7	Dipeptidyl peptidase 2	2.28216	0.401355	1.87514	O	O	-	-
4062	NLSCIVNEGK	P40189	IL6ST	Interleukin-6 receptor subunit beta	2.28469	1.13414	2.55283	O	-	O	↑
4063	NLSDLLEK	Q7Z4H8	KDELC2	KDEL motif-containing protein 2	2.29596	0.708014	2.45224	O	-	O	-
4067	NLSFSASGTQLSLR	P21709	EPHA1	Ephrin type-A receptor 1	1.50306	0.603782	1.87605	-	-	-	-
4068	NLSHLPTFSSPAIESHIHR	Q3T906	GNPTAB	N-acetylglucosamine-1-phosphotransferase subunits alpha/beta;N-acetylglucosamine-1-phosphotransferase subunit alpha;N-acetylglucosamine-1-phosphotransferase subunit beta	2.10031	3.862	2.45888	O	O	O	↑
4069	NLSIAESRPLDSR	Q9UN74	PCDHA4	Protocadherin alpha-4	0.40023	0.495755	2.64781	O	O	O	-
4071	NLSLDIGTEVFAPGPGSGIQK	Q99519	NEU1	Sialidase-1	8.68605	0.126486	1.18263	O	O	-	-
4073	NLSQDVNGTLVSIYAVPEK	Q9UIQ6	LNPEP	Leucyl-cystinyl aminopeptidase;Leucyl-cystinyl aminopeptidase, pregnancy serum form	12.8946	0.325696	2.67901	O	O	O	-
4075	NLSTCFSSGDLFTAHNFSEQSR	Q15043	SLC39A14	Zinc transporter ZIP14	2.89447	0.612656	2.5403	O	-	O	-
4076	NLTEILNGGVYVDQNK	Q15303	ERBB4	Receptor tyrosine-protein kinase erbB-4;ERBB4 intracellular domain	0.31137	1.87151	2.07225	O	-	O	-
4077	NLTEKPPHIEVYETAEDR	O94923	GLCE	D-glucuronyl C5-epimerase	2.18223	1.53949	1.03613	O	-	-	↑
4078	NLTEKPPHIEVYETAEDRDK	O94923	GLCE	D-glucuronyl C5-epimerase	3.84131	0.0791537	23.2958	O	O	O	-
4079	NLTEVPTDLPAYVR	Q13641	TPBG	Trophoblast glycoprotein	1.93549	0.893166	2.29104	-	-	O	-
4080	NLTFEGPLPEK	Q9HAT2	SIAE	Sialate O-acetylesterase	1.69513	0.628594	2.96267	-	-	O	-
4081	NLTFNITK	H3BS89	TMEM178B	Transmembrane protein 178B	1.15765	1.57135	1.37268	-	-	-	↑
4082	NLTHLESLHLEDNALK	Q13641	TPBG	Trophoblast glycoprotein	2.74689	0.818838	2.99094	O	-	O	-
4083	NLTLMATTSQLPK	P11117	ACP2	Lysosomal acid phosphatase	1.15565	1.05647	1.52436	-	-	-	↑
4084	NLTLWCR	Q8N6C5	IGSF1	Immunoglobulin superfamily member 1	2.01391	0.363279	3.348	O	O	O	-
4085	NLTNIDISK	O60603	TLR2	Toll-like receptor 2	5.72073	0.777142	1.16991	O	-	-	-
4086	NLTNLASNVK	Q96DT7	ZBTB10	Zinc finger and BTB domain-containing protein 10	1.56309	1.01329	0.658931	-	-	-	-
4087	NLTNVLGTQSR	Q9NPC4	A4GALT	Lactosylceramide 4-alpha-galactosyltransferase	1.72453	0.453461	1.60592	-	O	-	-
4088	NLTQPEVIIQPSSR	Q8N0Z9	VSIG10	V-set and immunoglobulin domain-containing protein 10	1.83375	0.916623	2.22731	-	-	O	-
4089	NLTVCPDGALFEQK	P54709	ATP1B3	Sodium/potassium-transporting ATPase subunit beta-3	1.95382	0.758673	2.19497	-	-	O	-
4090	NLTVYTGLWVK	P56749	CLDN12	Claudin-12	1.06585	0.593327	4.09454	-	-	O	-
4099	NMSCSINNTLLGQK	Q7KYR7	BTN2A1	Butyrophilin subfamily 2 member A1	1.48329	1.27558	3.16828	-	-	O	↑
4100	NMSFVNDLTVTQDGR	Q9HDC9	APMAP	Adipocyte plasma membrane-associated protein	1.66937	1.25184	1.50828	-	-	-	↑
4101	NMSFVNDLTVTQDGRK	Q9HDC9	APMAP	Adipocyte plasma membrane-associated protein	0.523659	0.947304	8.61589	-	-	O	-
4102	NMTAQNYTYAIR	Q9Y2E5	MAN2B2	Epididymis-specific alpha-mannosidase	1.54093	0.896329	3.05781	-	-	O	-
4103	NMTFDLPSDATVVLNR	P11279	LAMP1	Lysosome-associated membrane glycoprotein 1	1.84242	1.06463	2.05837	-	-	O	↑
4104	NMTLFSDLVAEK	P12110	COL6A2	Collagen alpha-2(VI) chain	0.52774	1.09036	1.57757	-	-	-	-
4105	NMTLPGENGQNLVEWR	Q9P273	TENM3	Teneurin-3	2.53116	1.34523	3.02912	O	-	O	↑
4106	NMTSEFFAAQLR	P19440	GGT1;GGT3P;GGT2	Gamma-glutamyltranspeptidase 1;Gamma-glutamyltranspeptidase 1 heavy chain;Gamma-glutamyltranspeptidase 1 light chain;Putative gamma-glutamyltranspeptidase 3;Putative gamma-glutamyltranspeptidase 3 heavy chain;Putative gamma-glutamyltranspeptidase 3 light chain;Inactive gamma-glutamyltranspeptidase 2	0.471817	1.8542	1.78361	O	-	-	-
4121	NNSEPVFLLSSNSSLR	Q8N0Z9	VSIG10	V-set and immunoglobulin domain-containing protein 10	10.5729	0.918467	0.526133	O	-	-	-
4122	NNSEPVFLLSSNSSLRPAEPR	Q8N0Z9	VSIG10	V-set and immunoglobulin domain-containing protein 10	1.38924	0.0126269	3.10501	-	O	O	-
4123	NNTFLSLR	P13726	F3	Tissue factor	1.30912	0.978199	2.18737	-	-	O	-
4124	NNTIVNELVR	P10253	GAA	Lysosomal alpha-glucosidase;76 kDa lysosomal alpha-glucosidase;70 kDa lysosomal alpha-glucosidase	1.27828	0.935332	2.17121	-	-	O	-
4125	NNTTFLECAPK	Q99985	SEMA3C	Semaphorin-3C	7.14929	0.541563	2.66919	O	-	O	-
4143	NQSIGLIQPFATNGK	Q9UIQ6	LNPEP	Leucyl-cystinyl aminopeptidase;Leucyl-cystinyl aminopeptidase, pregnancy serum form	1.19814	1.08429	4.35448	-	-	O	↑
4144	NQSLSLLYK	Q06481	APLP2	Amyloid-like protein 2	2.35169	0.81742	0.990068	O	-	-	-
4145	NQSLVQDMDSMVR	Q8NHP8	PLBD2	Putative phospholipase B-like 2;Putative phospholipase B-like 2 32 kDa form;Putative phospholipase B-like 2 45 kDa form	1.29379	1.96926	1.80388	-	-	-	↑
4146	NQSVPLSCCR	O60637	TSPAN3	Tetraspanin-3	42.9385	0.232145	1.03326	O	O	-	-
4162	NSSDIVQIAPQSLILK	P18564	ITGB6	Integrin beta-6	0.946451	0.889428	2.07599	-	-	O	-
4163	NSSFHFLR	P46531	NOTCH1	Neurogenic locus notch homolog protein 1;Notch 1 extracellular truncation;Notch 1 intracellular domain	1.58162	0.362902	23.1285	-	O	O	-
4164	NSSGPDLSWLHFYR	Q9ULI3	HEG1	Protein HEG homolog 1	2.61353	7.7208	0.15834	O	O	O	-
4167	NSSVGPLYSGCR	Q8WXI7	MUC16	Mucin-16	7.61477	1.87599	2.81474	O	-	O	↑
4168	NSSWIFFCEEETR	Q6Y288	B3GALTL	Beta-1,3-glucosyltransferase	1.96919	0.191252	10.2369	-	O	O	-
4169	NSSYFVEWIPNNVK	P07437	TUBB;TUBB6;TUBB4B;TUBB2B;TUBB4A;TUBB2A;TUBB3	Tubulin beta chain;Tubulin beta-6 chain;Tubulin beta-4B chain;Tubulin beta-2B chain;Tubulin beta-4A chain;Tubulin beta-2A chain;Tubulin beta-3 chain	0.160217	0.678702	0.377043	O	-	O	↓
4170	NSTCLDDSWIHPR	Q96F46	IL17RA	Interleukin-17 receptor A	1.91057	0.802348	2.94588	-	-	O	-
4171	NSTFTYFTSDHGGHLEAR	P51689	ARSD	Arylsulfatase D	0.128354	0.894932	15.3738	O	-	O	-
4172	NSTIEAANLAGLK	P48723	HSPA13	Heat shock 70 kDa protein 13	2.34015	1.16417	2.89608	O	-	O	↑
4173	NSTSIYFK	P19256	CD58	Lymphocyte function-associated antigen 3	1.98536	0.877943	1.0694	-	-	-	-
4188	NTSAASTAQLVEATEELR	P55268	LAMB2	Laminin subunit beta-2	1.71796	2.42553	8.85075	-	O	O	↑
4189	NTSAASTAQLVEATEELRR	P55268	LAMB2	Laminin subunit beta-2	1.9499	0.882428	60.6737	-	-	O	-
4190	NTSGSNQQAFLLENVPCNNASCEEAR	Q8TB96	ITFG1	T-cell immunomodulatory protein	0.0163939	3.09953	1.31722	O	O	-	-
4191	NTSPDTNYTLYYWHR	P78552	IL13RA1	Interleukin-13 receptor subunit alpha-1	2.11301	0.951582	2.36789	O	-	O	-
4192	NTSVGLLYSGCR	Q8WXI7	MUC16	Mucin-16	8.08753	0.511782	1.26427	O	-	-	-
4193	NTSVGPLYSGCR	Q8WXI7	MUC16	Mucin-16	2.55054	0.458709	2.68421	O	O	O	-
4194	NTSVSSLYSGCR	Q8WXI7	MUC16	Mucin-16	3.14291	0.591931	2.42654	O	-	O	-
4195	NTSWDNAGFK	P78536	ADAM17	Disintegrin and metalloproteinase domain-containing protein 17	1.70444	1.03634	2.45003	-	-	O	↑
4196	NTTAADTYNITDPEELETEYPFFESR	P08069	IGF1R	Insulin-like growth factor 1 receptor;Insulin-like growth factor 1 receptor alpha chain;Insulin-like growth factor 1 receptor beta chain	0.658977	1.22167	0.0561527	-	-	O	-
4197	NTTEVVNTMCGYK	O95858	TSPAN15	Tetraspanin-15	82.946	0.688606	18.4865	O	-	O	-
4198	NTTIFLK	Q8NBN3	TMEM87A	Transmembrane protein 87A	1.17838	0.863549	2.10424	-	-	O	-
4199	NTTQHPNVTTLAPISNVTSAPVTSLPLVTTPAPETCEGR	Q04900	CD164	Sialomucin core protein 24	77.2841	4.32036	0.0304799	O	O	O	-
4200	NTTSVWYTSK	P04066	FUCA1	Tissue alpha-L-fucosidase	1.23653	4.09085	1.51509	-	O	-	↑
4226	NVSCLWCNTNK	P53801	PTTG1IP	Pituitary tumor-transforming gene 1 protein-interacting protein	2.24389	0.878278	3.22031	O	-	O	-
4227	NVSECFLAR	Q8N271	PROM2	Prominin-2	1.29999	0.400396	1.61552	-	O	-	-
4228	NVSGFSIANR	Q9H5V8	CDCP1	CUB domain-containing protein 1	2.34193	0.872544	2.44664	O	-	O	-
4230	NVTAQICIDK	P12109	COL6A1	Collagen alpha-1(VI) chain	3.68305	10.3528	0.852221	O	O	-	-
4231	NVTCENGLPAVVSCVPGQVFSPDGPSR	Q9Y4K0	LOXL2	Lysyl oxidase homolog 2	1.05738	0.0859684	1.10053	-	O	-	-
4233	NVTHLLQQELTEAQK	Q10589	BST2	Bone marrow stromal antigen 2	1.13832	0.859608	2.39413	-	-	O	-
4234	NVTHLYSTILGHQIGLSGR	Q9NWD8	TMEM248	Transmembrane protein 248	0.104487	0.148096	16.3317	O	O	O	-
4235	NVTICVPDFGQDLYR	Q86VE9	SERINC5	Serine incorporator 5	1.76113	0.947896	1.98894	-	-	-	-
4236	NVTLILDCK	P20908	COL5A1	Collagen alpha-1(V) chain	13.9752	0.639559	1.72047	O	-	-	-
4237	NVTLPAVFK	P36578	RPL4	60S ribosomal protein L4	0.894281	0.36042	7.75916	-	O	O	-
4238	NVTNQIALLK	Q58DX5	NAALADL2	Inactive N-acetylated-alpha-linked acidic dipeptidase-like protein 2	1.8414	0.494331	1.92679	-	O	-	-
4245	NWTASLLCSAADLPAR	Q8TCT7	SPPL2B	Signal peptide peptidase-like 2B	2.30234	0.48707	2.44172	O	O	O	-
4256	NYSLLIDQPDK	Q9NY97	B3GNT2	N-acetyllactosaminide beta-1,3-N-acetylglucosaminyltransferase 2	7.20751	0.510754	0.818469	O	-	-	-
4257	NYSLNDATITLHNIGFSDSGK	Q9NQS3	PVRL3	Nectin-3	1.31103	0.122067	1.60882	-	O	-	-
4258	NYSMIVMFTALQPQR	Q13454	TUSC3	Tumor suppressor candidate 3	0.801736	2.32439	3.24608	-	O	O	-
4261	NYSSGTHNIEVIVQDSAGR	Q0P6H9	TMEM62	Transmembrane protein 62	0.308021	3.68024	1.69631	O	O	-	-
4262	NYSVLYFQQK	P42785	PRCP	Lysosomal Pro-X carboxypeptidase	1.47243	0.788236	1.805	-	-	-	-
4263	NYTADYDKALIFNK	O94905	ERLIN2	Erlin-2	0.169129	0.629509	0.517955	O	-	-	↓
4265	NYTIFYR	P40189	IL6ST	Interleukin-6 receptor subunit beta	4.38325	32.6294	2.21238	O	O	O	↑
4266	PAALPSNLSHLLNHSLQR	P48067	SLC6A9	Sodium- and chloride-dependent glycine transporter 1	1.95789	1.09969	1.1591	-	-	-	↑
4268	PAIQWTITGSGSVINQTEESPYINGR	Q13740	ALCAM	CD166 antigen	2.25105	0.730674	1.49879	O	-	-	-
4272	PDASLQVDTVVPNATVSEK	O75054	IGSF3	Immunoglobulin superfamily member 3	2.01559	1.51929	1.09642	O	-	-	↑
4274	PDTLAVAVENGTGTDR	Q9H0X4	ITFG3	Protein ITFG3	5.61895	1.0694	0.916432	O	-	-	-
4275	PEAVQFFNVTTLQK	O75718	CRTAP	Cartilage-associated protein	10.5824	0.835493	1.05599	O	-	-	-
4278	PGAMNFSYSPLLR	O15230	LAMA5	Laminin subunit alpha-5	1.20556	0.281265	1.94087	-	O	-	-
4280	PGMVVTFAPVNVTTEVK	Q5VTE0	EEF1A1P5;EEF1A1	Putative elongation factor 1-alpha-like 3;Elongation factor 1-alpha 1	0.0782861	0.582004	0.940305	O	-	-	↓
4281	PGNLSRPPPVVVPHQPR	Q9BU23	LMF2	Lipase maturation factor 2	0.0979439	0.254317	2.67864	O	O	O	-
4283	PGPLSTANHTALR	O60512	B4GALT3	Beta-1,4-galactosyltransferase 3;N-acetyllactosamine synthase;Beta-N-acetylglucosaminylglycopeptide beta-1,4-galactosyltransferase;Beta-N-acetylglucosaminyl-glycolipid beta-1,4-galactosyltransferase	0.112492	0.409916	0.463069	O	O	O	↓
4284	PGTDGGLPTNYSLTYHR	P16471	PRLR	Prolactin receptor	1.58777	1.04442	0.945664	-	-	-	-
4287	PHFGDQEPVQGFVMNFSNGEIIDIFKPVR	P19021	PAM	Peptidyl-glycine alpha-amidating monooxygenase;Peptidylglycine alpha-hydroxylating monooxygenase;Peptidyl-alpha-hydroxyglycine alpha-amidating lyase	7.00167	0.382346	0.91764	O	O	-	-
4288	PIIISMNYSLPLR	P26006	ITGA3	Integrin alpha-3;Integrin alpha-3 heavy chain;Integrin alpha-3 light chain	2.10162	1.13457	0.572362	O	-	-	-
4291	PLGLANDTDHYFLR	Q969N2	PIGT	GPI transamidase component PIG-T	1.27677	0.79218	1.10926	-	-	-	-
4295	PLTNCSIINSGK	P45877	PPIC	Peptidyl-prolyl cis-trans isomerase C	1.34892	0.246012	0.456125	-	O	O	-
4297	PMFTYNWTEETLR	Q93050	ATP6V0A1	V-type proton ATPase 116 kDa subunit a isoform 1	1.92906	0.895739	1.4573	-	-	-	-
4299	PPLAELAALNLSGSR	Q13641	TPBG	Trophoblast glycoprotein	13.043	0.45086	0.173619	O	O	O	-
4302	PQPLNETAPSNLWK	Q14703	MBTPS1	Membrane-bound transcription factor site-1 protease	185.876	0.110388	139.208	O	O	O	-
4303	PSAAAASVSTQHGSILQLNDTLEEK	Q68CP4	HGSNAT	Heparan-alpha-glucosaminide N-acetyltransferase	3.04428	0.108045	29.9898	O	O	O	-
4304	PSAVVQMGQNVSLR	Q8N6C5	IGSF1	Immunoglobulin superfamily member 1	1.63728	1.5451	2.27616	-	-	O	↑
4307	PTAGAFNHSDLDAELR	P09758	TACSTD2	Tumor-associated calcium signal transducer 2	47.1897	0.89994	1.02385	O	-	-	-
4309	PVDKPINTTLICNVTNALGAR	P15151	PVR	Poliovirus receptor	1.17283	1.1589	1.35435	-	-	-	↑
4311	PVQGIPTYVLLNTSGISTPAR	Q96RW7	HMCN1	Hemicentin-1	10.0047	1.61524	3.10932	O	-	O	↑
4313	PVTDGQPHSINITR	P78357	CNTNAP1	Contactin-associated protein 1	1.91308	0.171479	2.75471	-	O	O	-
4314	PWLSNESIALFK	Q92485	SMPDL3B	Acid sphingomyelinase-like phosphodiesterase 3b	35.0125	0.826278	0.824162	O	-	-	-
4315	PYSIPPCEHHVNGSRPPCTGEGDTPK	P07858	CTSB	Cathepsin B;Cathepsin B light chain;Cathepsin B heavy chain	0.198251	0.67929	1.69831	O	-	-	-
4317	QAFDQILQDRNHSSYLGYSVAAISTGESTHFVAGAPR	P17301	ITGA2	Integrin alpha-2	0.785618	0.313916	28.0884	-	O	O	-
4320	QAIHVGNQTFNDGTIVEK	Q9H3G5	CPVL	Probable serine carboxypeptidase CPVL	2.1158	0.861695	13.8787	O	-	O	-
4325	QAWALVGVIDGGSTSCNESVR	Q9UHN6	TMEM2	Transmembrane protein 2	2.02301	0.234921	2.92472	O	O	O	-
4328	QCLEEAQLENETIGCSK	P32241	VIPR1	Vasoactive intestinal polypeptide receptor 1	0.164402	0.400965	2.99468	O	O	O	-
4329	QCNGTSMCWCVNTAGVR	P16422	EPCAM	Epithelial cell adhesion molecule	0.580312	0.84367	7.43225	-	-	O	-
4330	QCNQTSVCWCVNSVGVR	P09758	TACSTD2	Tumor-associated calcium signal transducer 2	11.0456	0.797192	3.38041	O	-	O	-
4334	QDILNNSLTTLSQDITK	Q70UQ0	IKBIP	Inhibitor of nuclear factor kappa-B kinase-interacting protein	0.0615627	0.0626062	3.32926	O	O	O	-
4337	QDNETGIYYETWNVK	O75503	CLN5	Ceroid-lipofuscinosis neuronal protein 5	1.32354	0.324502	2.05666	-	O	O	-
4338	QDVNITVATVPSWLK	Q13308	PTK7	Inactive tyrosine-protein kinase 7	0.916813	0.726785	0.732144	-	-	-	↓
4339	QEAKENGTNLTFIGDK	Q8NBN3	TMEM87A	Transmembrane protein 87A	0.699308	0.0188146	174.14	-	O	O	-
4340	QECYAFNGTQR	P04440	HLA-DPB1	HLA class II histocompatibility antigen, DP beta 1 chain	0.657061	0.597289	0.334412	-	-	O	↓
4341	QEHQVLLQELPGSEHIEMLANATTLAYLK	Q8NCC3	PLA2G15	Group XV phospholipase A2	0.346229	0.648105	0.075071	O	-	O	↓
4351	QFFSNCTVDR	O60896	RAMP3	Receptor activity-modifying protein 3	1.4281	0.732119	1.83058	-	-	-	-
4360	QGIDFCPGQNVSGVTTHNLEDHTK	P34059	GALNS	N-acetylgalactosamine-6-sulfatase	0.11718	0.0366054	4.06146	O	O	O	-
4363	QGNYSAGLPR	Q3MIR4	TMEM30B	Cell cycle control protein 50B	1.24496	0.857673	1.04855	-	-	-	-
4374	QINSSISGNLWDK	Q01459	CTBS	Di-N-acetylchitobiase	98.8453	23.6702	1.5837	O	O	-	↑
4375	QINSSISGNLWDKDQR	Q01459	CTBS	Di-N-acetylchitobiase	1.65439	0.0726144	5.13442	-	O	O	-
4390	QLEEFLNQSSPFYFWMNGDR	P10909	CLU	Clusterin;Clusterin beta chain;Clusterin alpha chain	59.2729	0.691236	1.9789	O	-	-	-
4394	QLHCCGIHNYSDWENTDWFK	O60637	TSPAN3	Tetraspanin-3	2.10512	0.396035	43.5228	O	O	O	-
4412	QLVLNLTGNTLCAGGASDEK	O00592	PODXL	Podocalyxin	2.69372	0.733414	2.35398	O	-	O	-
4421	QNISVTLR	Q9H5V8	CDCP1	CUB domain-containing protein 1	1.38963	1.17349	0.102465	-	-	O	-
4428	QNVTEFPIIK	Q9P2K2	TXNDC16	Thioredoxin domain-containing protein 16	1.72919	0.759199	2.82804	-	-	O	-
4432	QPVSPVIHPPVSYNDTAPR	Q15904	ATP6AP1	V-type proton ATPase subunit S1	1.35896	0.771052	1.46785	-	-	-	-
4436	QQLAYGIYVIHQAGNGTFNR	O60512	B4GALT3	Beta-1,4-galactosyltransferase 3;N-acetyllactosamine synthase;Beta-N-acetylglucosaminylglycopeptide beta-1,4-galactosyltransferase;Beta-N-acetylglucosaminyl-glycolipid beta-1,4-galactosyltransferase	18.4481	1.0538	3.29802	O	-	O	↑
4441	QRYEDLVLNETLNK	Q9NQZ7	ENTPD7	Ectonucleoside triphosphate diphosphohydrolase 7	1.95789	0.829176	5.84458	-	-	O	-
4444	QSIGQNYSNVIANLR	Q6UWY0	ARSK	Arylsulfatase K	1.15805	0.734788	1.15853	-	-	-	-
4446	QSQFLNVTATEDYVDPVTNQTK	O15118	NPC1	Niemann-Pick C1 protein	2.55213	0.576823	4.01778	O	-	O	-
4448	QSTHSIYMFFNTSELR	P01137	TGFB1	Transforming growth factor beta-1;Latency-associated peptide	1.17072	0.24917	0.983502	-	O	-	-
4456	QTDVINASWWVMSNK	Q12999	TSPAN31	Tetraspanin-31	1.66913	0.225883	2.07613	-	O	O	-
4457	QTECMVEQYSNYSVNGEPVNGR	P42892	ECE1	Endothelin-converting enzyme 1	16.531	0.670635	0.981255	O	-	-	-
4458	QTLFFNGTR	Q8NFZ8	CADM4	Cell adhesion molecule 4	1.46115	1.14826	2.34518	-	-	O	↑
4461	QTMIDFLQNHTEGSRPPACPR	Q6ZRP7	QSOX2	Sulfhydryl oxidase 2	2.42923	0.873936	2.0399	O	-	O	-
4466	QVALQTFGNQTTIIPAGGAGYK	Q9NX62	IMPAD1	Inositol monophosphatase 3	1.66832	0.445254	3.71742	-	O	O	-
4476	QVLLLQDSFMNCSDSIINGSFR	Q86SJ2	AMIGO2	Amphoterin-induced protein 2	1.90871	0.944976	2.84731	-	-	O	-
4477	QVLNITDK	P22223	CDH3	Cadherin-3	0.982684	1.32276	0.706225	-	-	-	-
4479	QVLSYGQNLSFSFR	P11047	LAMC1	Laminin subunit gamma-1	1.26068	0.535924	0.950791	-	-	-	-
4480	QVNETWTLENCTVAR	Q9HC84	MUC5B	Mucin-5B	3.84398	1.06507	0.696551	O	-	-	-
4485	QVTQEMLNHTIAIR	Q14517	FAT1	Protocadherin Fat 1;Protocadherin Fat 1, nuclear form	1.32253	0.26747	5.94304	-	O	O	-
4491	QVYNLTVR	Q14517	FAT1	Protocadherin Fat 1;Protocadherin Fat 1, nuclear form	0.676846	0.871305	0.498167	-	-	O	↓
4499	QYLSYETLYANGSR	O95084	PRSS23	Serine protease 23	1.52944	0.694429	1.12342	-	-	-	-
4506	RAEDTAGQTALTVMRPDASLQVDTVVPNATVSEK	O75054	IGSF3	Immunoglobulin superfamily member 3	1.10911	3.39898	2.58632	-	O	O	↑
4509	RANTSALAVPSPVSNSASAR	P55268	LAMB2	Laminin subunit beta-2	1.59229	1.07576	6.80408	-	-	O	↑
4513	RDCVECLLLHSGKPDNQTCHSLCR	P18084	ITGB5	Integrin beta-5	4.88176	5.38091	67.8699	O	O	O	↑
4516	RDPGAAVPGAANASAQQPR	P28300	LOX	Protein-lysine 6-oxidase	0.89664	0.3989	0.297776	-	O	O	↓
4518	REAINITLDHK	O00469	PLOD2	Procollagen-lysine,2-oxoglutarate 5-dioxygenase 2	0.749604	1.14235	4.88243	-	-	O	-
4521	REQINITLDHR	Q02809	PLOD1	Procollagen-lysine,2-oxoglutarate 5-dioxygenase 1	4.81388	39.7518	1.02534	O	O	-	↑
4522	RFDNFSSLSIQWESTR	Q8TEM1	NUP210	Nuclear pore membrane glycoprotein 210	1.09414	0.121006	0.976912	-	O	-	-
4525	RFPTHYMPYNESVSFEDR	Q9UJA9	ENPP5	Ectonucleotide pyrophosphatase/phosphodiesterase family member 5	0.578023	1.20782	2.33238	-	-	O	-
4530	RGPECSQNYTTPSGVIK	O14786	NRP1	Neuropilin-1	0.765514	27.3155	0.422318	-	O	O	-
4532	RGVFITNETGQPLIGK	P10253	GAA	Lysosomal alpha-glucosidase;76 kDa lysosomal alpha-glucosidase;70 kDa lysosomal alpha-glucosidase	1.47458	0.573434	18.6086	-	-	O	-
4546	RLDPEENHTAELVIPELPLAHPPNER	Q9NZQ7	CD274	Programmed cell death 1 ligand 1	0.439367	0.828687	1.55337	O	-	-	-
4552	RLNTTGVSAGCTADLLVGR	O15230	LAMA5	Laminin subunit alpha-5	2.28754	0.184379	17.7211	O	O	O	-
4555	RMELSMGPIQANHTGTGLLLTLQPEQK	P04062	GBA	Glucosylceramidase	1.4758	1.36169	275.938	-	-	O	↑
4556	RNASAVVLYNEER	Q8NC42	RNF149	E3 ubiquitin-protein ligase RNF149	1.18493	1.06128	3.52226	-	-	O	↑
4560	RNESHLIDFR	Q9UJ14	GGT7	Gamma-glutamyltransferase 7;Gamma-glutamyltransferase 7 heavy chain;Gamma-glutamyltransferase 7 light chain	1.1897	2.89909	2.35202	-	O	O	↑
4561	RNFTAADWGQSR	P12109	COL6A1	Collagen alpha-1(VI) chain	0.823534	0.78011	2.18465	-	-	O	-
4562	RNITLAYTLEADR	P26006	ITGA3	Integrin alpha-3;Integrin alpha-3 heavy chain;Integrin alpha-3 light chain	1.46652	0.571431	1.79191	-	-	-	-
4563	RNITLAYTLEADRDR	P26006	ITGA3	Integrin alpha-3;Integrin alpha-3 heavy chain;Integrin alpha-3 light chain	0.0120803	0.417529	0.0318536	O	O	O	↓
4564	RNLSASVIAVTIQGGAHHLDLR	Q9UHL4	DPP7	Dipeptidyl peptidase 2	2.89126	0.319769	2.07873	O	O	O	-
4565	RNLSDLLEK	Q7Z4H8	KDELC2	KDEL motif-containing protein 2	1.46937	0.129287	0.196786	-	O	O	-
4566	RNLSYWESHCDMINGTDAASFPPFVEK	P16671	CD36	Platelet glycoprotein 4	2.24981	0.381896	1.92492	O	O	-	-
4567	RNMTLPGENGQNLVEWR	Q9P273	TENM3	Teneurin-3	0.382094	1.30677	13.7618	O	-	O	-
4568	RNNTFLSLR	P13726	F3	Tissue factor	1.26304	0.897697	4.96158	-	-	O	-
4569	RNQSLSLLYK	Q06481	APLP2	Amyloid-like protein 2	1.88152	0.847714	2.33934	-	-	O	-
4570	RNTTWQAGHNFYNVDMSYLK	P07858	CTSB	Cathepsin B;Cathepsin B light chain;Cathepsin B heavy chain	1.77682	0.877062	1.50379	-	-	-	-
4571	RPAPPAAVLGCYLFNCTAR	Q86VZ4	LRP11	Low-density lipoprotein receptor-related protein 11	20.6519	0.571252	2.03468	O	-	O	-
4575	RPNQSQPLPPSSLQR	Q92542	NCSTN	Nicastrin	4.83126	0.931353	1.72871	O	-	-	-
4576	RPPLAELAALNLSGSR	Q13641	TPBG	Trophoblast glycoprotein	1.37678	0.674084	1.95925	-	-	-	-
4578	RPSLQMNTSIWYNR	P54802	NAGLU	Alpha-N-acetylglucosaminidase;Alpha-N-acetylglucosaminidase 82 kDa form;Alpha-N-acetylglucosaminidase 77 kDa form	1.54606	0.396433	2.18419	-	O	O	-
4581	RPVYELSPDPNNTGFINQDFVVWMR	Q3MIR4	TMEM30B	Cell cycle control protein 50B	2.08017	2.03948	0.563192	O	O	-	-
4582	RPYVSYVNNSIAR	Q9Y2E5	MAN2B2	Epididymis-specific alpha-mannosidase	1.26971	0.823363	2.93122	-	-	O	-
4584	RQDVNITVATVPSWLK	Q13308	PTK7	Inactive tyrosine-protein kinase 7	0.652568	0.355791	4.43121	-	O	O	-
4587	RQTECMVEQYSNYSVNGEPVNGR	P42892	ECE1	Endothelin-converting enzyme 1	1.42583	0.943013	9.9514	-	-	O	-
4590	RSNYTPITNVPPEVTVLTNSPVELR	P01903	HLA-DRA	HLA class II histocompatibility antigen, DR alpha chain	1.15653	0.581822	10.4151	-	-	O	-
4611	SAEFFNYTVR	O60568	PLOD3	Procollagen-lysine,2-oxoglutarate 5-dioxygenase 3	1.21209	0.922007	1.74715	-	-	-	-
4613	SAEGTFFINKTEIEDFPR	P06865	HEXA	Beta-hexosaminidase subunit alpha	0.161074	0.194676	0.319259	O	O	O	↓
4625	SANSTLAQALHWTR	Q9BU23	LMF2	Lipase maturation factor 2	1.45307	0.82731	2.31578	-	-	O	-
4628	SAVSTSWLLPYNYTWSPEK	Q8NCC3	PLA2G15	Group XV phospholipase A2	1.67342	1.54168	2.75356	-	-	O	↑
4631	SCLEREDTVLEVTESNTTSVVDGDKR	Q9NQ36	SCUBE2	Signal peptide, CUB and EGF-like domain-containing protein 2	0.90576	1.10957	7.45031	-	-	O	-
4633	SCMSNCSITSICEKPQEVCVAVWR	P37173	TGFBR2	TGF-beta receptor type-2	2.10658	0.0255231	1.5194	O	O	-	-
4635	SCVAVTSAQPQNMSR	O15031	PLXNB2	Plexin-B2	1.20539	0.956509	0.319613	-	-	O	-
4639	SDAVSHTGNYTCEVTELTR	Q08722	CD47	Leukocyte surface antigen CD47	1.64365	0.533533	2.91258	-	-	O	-
4641	SDESVGNVTFSFDYQK	P17181	IFNAR1	Interferon alpha/beta receptor 1	0.206527	9.13117	1.86904	O	O	-	-
4642	SDEYNCSSGMCIR	Q92673	SORL1	Sortilin-related receptor	2.47804	0.483454	1.4566	O	O	-	-
4644	SDFSQTMLFQANTTR	P23470	PTPRG	Receptor-type tyrosine-protein phosphatase gamma	0.467455	0.140696	0.511462	O	O	-	↓
4658	SDPHWESMLNATTR	Q9H0X4	ITFG3	Protein ITFG3	1.39939	0.213595	1.62349	-	O	-	-
4666	SDVEINYSLIEIK	Q5JPE7	NOMO2;NOMO1;NOMO3	Nodal modulator 2;Nodal modulator 1;Nodal modulator 3	8.02054	1.24976	7.58369	O	-	O	↑
4669	SEASEGNITVTCR	Q29983	MICA	MHC class I polypeptide-related sequence A	1.37831	0.881175	3.26504	-	-	O	-
4671	SECHFFNGTER	P79483	HLA-DRB3	HLA class II histocompatibility antigen, DR beta 3 chain	3.00507	0.0643173	2.1345	O	O	O	-
4675	SEELDIFANSSLK	O15455	TLR3	Toll-like receptor 3	3.72955	13.3119	1.19499	O	O	-	↑
4676	SEGAIQVNFTLVR	O75976	CPD	Carboxypeptidase D	1.65004	0.569236	1.78361	-	-	-	-
4677	SEGTNSTLTLSPVSFENEHSYLCTVTCGHK	P19320	VCAM1	Vascular cell adhesion protein 1	1.74545	0.247766	3.25036	-	O	O	-
4689	SELGAVIFWGQNQTLDPNNMTILNR	Q8TB96	ITFG1	T-cell immunomodulatory protein	100.817	4.79706	1.6144	O	O	-	↑
4694	SENASLVLSSSNQK	P56199	ITGA1	Integrin alpha-1	3.7412	0.807173	1.30288	O	-	-	-
4696	SEQLVNFTGK	Q9BVX2	TMEM106C	Transmembrane protein 106C	0.978403	1.04819	1.74509	-	-	-	-
4699	SEYNITITVTDFGTPR	Q9Y5E7	PCDHB2	Protocadherin beta-2	2.61172	0.341132	1.04485	O	O	-	-
4700	SFDDHFQHLLNDSER	P35052	GPC1	Glypican-1;Secreted glypican-1	5.57975	0.0372414	9.15208	O	O	O	-
4704	SFGGWNTSGCVAHR	Q86SQ4	GPR126	G-protein coupled receptor 126	1.77473	1.15345	2.27017	-	-	O	↑
4714	SFSGVLDCGNCSR	P54289	CACNA2D1	Voltage-dependent calcium channel subunit alpha-2/delta-1;Voltage-dependent calcium channel subunit alpha-2-1;Voltage-dependent calcium channel subunit delta-1	0.926909	0.755734	2.25308	-	-	O	-
4716	SFTDLLLDDGQDNNTQIEEDTDHNYYISR	Q6UX71	PLXDC2	Plexin domain-containing protein 2	14.2511	0.462668	0.232967	O	O	O	-
4719	SFVQLWNDTVPTESLAR	P39060	COL18A1	Collagen alpha-1(XVIII) chain;Endostatin	0.785128	0.228023	9.69405	-	O	O	-
4724	SGDASINVTNLQLSDIGTYQCK	P78310	CXADR	Coxsackievirus and adenovirus receptor	2.24435	0.17586	0.424019	O	O	O	-
4731	SGILRNDSTVPDQFQCK	Q96RD7	PANX1	Pannexin-1	5.22706	0.146112	25.8358	O	O	O	-
4737	SGPKNMTFDLPSDATVVLNR	P11279	LAMP1	Lysosome-associated membrane glycoprotein 1	0.327894	10.8198	2.24762	O	O	O	-
4739	SGVINLTEEVLWVK	Q9UIQ6	LNPEP	Leucyl-cystinyl aminopeptidase;Leucyl-cystinyl aminopeptidase, pregnancy serum form	25.7197	0.39587	1.45176	O	O	-	-
4746	SHLQNYTVNATK	P40189	IL6ST	Interleukin-6 receptor subunit beta	3.2065	0.570243	3.84771	O	-	O	-
4759	SIINATDP	P35625	TIMP3	Metalloproteinase inhibitor 3	1.02449	0.56833	0.748929	-	-	-	-
4761	SILTVTNVTQEHFGNYTCVAANK	Q7Z3B1	NEGR1	Neuronal growth regulator 1	0.726483	0.108913	0.507366	-	O	-	↓
4767	SINVTGQGFSLIQR	O15031	PLXNB2	Plexin-B2	1.50577	0.901157	2.23179	-	-	O	-
4778	SIVLEPIYWNSSNSK	P52799	EFNB2	Ephrin-B2	13.9927	0.540887	0.988149	O	-	-	-
4779	SIVYSCEWPLYMWPFQKPNYTEIR	P06280	GLA	Alpha-galactosidase A	2.88326	0.730016	3.26323	O	-	O	-
4780	SIYNWTEEYGR	Q9NX78	TMEM260	Transmembrane protein 260	3.5164	0.53637	2.71565	O	-	O	-
4801	SLEEIGIQNYSTTSSCQAR	Q9NZ53	PODXL2	Podocalyxin-like protein 2	4.2357	0.649004	5.47629	O	-	O	-
4805	SLEVLWNVSR	Q16549	PCSK7	Proprotein convertase subtilisin/kexin type 7	1.82703	0.897946	1.92279	-	-	-	-
4808	SLGQFLSTENATIK	O95490	LPHN2	Latrophilin-2	1.656	0.219867	0.533626	-	O	-	-
4821	SLLEFNTTVSCDQQGTNHR	P11717	IGF2R	Cation-independent mannose-6-phosphate receptor	1.7434	0.849155	2.59602	-	-	O	-
4830	SLNLSYNK	Q96JA1	LRIG1	Leucine-rich repeats and immunoglobulin-like domains protein 1	2.37479	1.46226	1.1888	O	-	-	↑
4837	SLPNSSCLLEDK	P35367	HRH1	Histamine H1 receptor	3.12726	0.907488	1.4799	O	-	-	-
4845	SLTLEPDPIIVPGNVTLSVMGSTSVPLSSPLK	P17900	GM2A	Ganglioside GM2 activator;Ganglioside GM2 activator isoform short	104.88	0.393558	68.451	O	O	O	-
4853	SLVTQYLNATGNR	P08195	SLC3A2	4F2 cell-surface antigen heavy chain	1.36216	0.963195	2.06766	-	-	O	-
4863	SNASVNVSHPAPGDWFVAAHLPPSSQK	Q9HCN3	TMEM8A	Transmembrane protein 8A	12.3035	1.15365	40.9275	O	-	O	↑
4865	SNFTLTAAR	Q68D85	NCR3LG1	Natural cytotoxicity triggering receptor 3 ligand 1	2.09711	0.689896	1.35802	O	-	-	-
4866	SNHTIWFGHFTTSTILSPSPGIR	Q0P6H9	TMEM62	Transmembrane protein 62	1.02548	0.586153	35.7185	-	-	O	-
4867	SNHTQATNDPPEVTVFPK	P20036	HLA-DPA1	HLA class II histocompatibility antigen, DP alpha 1 chain	0.203063	0.0183052	0.39126	O	O	O	↓
4868	SNITFNNNDTVSFLEYR	Q8WTV0	SCARB1	Scavenger receptor class B member 1	2.22623	0.855121	2.09144	O	-	O	-
4872	SNLSDLLEK	Q6UW63	KDELC1	KDEL motif-containing protein 1	1.28904	1.61446	2.65792	-	-	O	↑
4873	SNLTVLR	P18084	ITGB5	Integrin beta-5	1.64718	6.91822	1.28467	-	O	-	↑
4879	SNVSGNTHLCISNGNYEK	P56159	GFRA1	GDNF family receptor alpha-1	1.86309	0.530381	0.832256	-	-	-	-
4880	SNVTLTLR	Q96F46	IL17RA	Interleukin-17 receptor A	0.0978422	0.455051	1.08561	O	O	-	-
4883	SNYTPITNVPPEVTVLTNSPVELR	P01903	HLA-DRA	HLA class II histocompatibility antigen, DR alpha chain	0.7495	0.553901	1.22052	-	-	-	-
4884	SPANGSLGPTLNLSSGESR	Q9BZC7	ABCA2	ATP-binding cassette sub-family A member 2	1.76516	1.08174	2.03369	-	-	O	↑
4887	SPENISVVEK	Q96RW7	HMCN1	Hemicentin-1	1.45135	0.441275	0.836652	-	O	-	-
4892	SPGANLTYELHVLNQDEER	P21709	EPHA1	Ephrin type-A receptor 1	0.0171863	0.630754	2.5003	O	-	O	-
4893	SPHRPILQAGLPANQTAVLGSDVEFHCK	P22607	FGFR3	Fibroblast growth factor receptor 3	1.46003	0.542728	1.80425	-	-	-	-
4894	SPHRPILQAGLPANTTAVVGSDVELLCK	P22455	FGFR4	Fibroblast growth factor receptor 4	34.4707	0.406126	52.4183	O	O	O	-
4896	SPIVTHCNVSTVNK	Q9UN76	SLC6A14	Sodium- and chloride-dependent neutral and basic amino acid transporter B(0+)	1.12039	2.61725	2.07513	-	O	O	↑
4898	SPSVDKYNVSGTNGTCLLASMGLQLNLTYER	P11279	LAMP1	Lysosome-associated membrane glycoprotein 1	1.7225	0.814875	2.04982	-	-	O	-
4899	SPTNTTPHVPAEGPEASRPPK	O00391	QSOX1	Sulfhydryl oxidase 1	1.04254	3.90968	0.108	-	O	O	-
4904	SQGYNSSQDLPSLVLDFVK	Q9NTN9	SEMA4G	Semaphorin-4G	0.889274	1.20122	34.0669	-	-	O	-
4907	SQNDTVTPDVWYTSK	Q9BTY2	FUCA2	Plasma alpha-L-fucosidase	1.91773	2.92199	1.2492	-	O	-	↑
4908	SQNDTVTPDVWYTSKPK	Q9BTY2	FUCA2	Plasma alpha-L-fucosidase	1.46673	0.019214	3.05824	-	O	O	-
4910	SQQTHTELSSILTIHNVSQHDLGSYVCK	P35916	FLT4	Vascular endothelial growth factor receptor 3	0.649094	2.0668	42.6922	-	O	O	-
4911	SQSTILVNITEK	P42702	LIFR	Leukemia inhibitory factor receptor	2.04061	0.88586	1.58733	O	-	-	-
4920	SRLWNSTFLEEYSK	P23229	ITGA6	Integrin alpha-6;Integrin alpha-6 heavy chain;Integrin alpha-6 light chain;Processed integrin alpha-6	5.05812	0.550399	1.10819	O	-	-	-
4921	SRNTTAADTYNITDPEELETEYPFFESR	P08069	IGF1R	Insulin-like growth factor 1 receptor;Insulin-like growth factor 1 receptor alpha chain;Insulin-like growth factor 1 receptor beta chain	1.75455	0.231784	2.01587	-	O	O	-
4927	SSCGKENTSDPSLVIAFGR	P11279	LAMP1	Lysosome-associated membrane glycoprotein 1	1.79278	0.913167	2.94854	-	-	O	-
4928	SSDNVSVTVLR	Q86VZ4	LRP11	Low-density lipoprotein receptor-related protein 11	12.3471	0.179742	1.44914	O	O	-	-
4945	SSSQYIESFWQSSQSQNFTAHDK	Q5JTV8	TOR1AIP1	Torsin-1A-interacting protein 1	111.43	1.91853	0.0459529	O	-	O	-
4951	STCPCNFTLYYEVAAR	Q8IZJ3	CPAMD8	C3 and PZP-like alpha-2-macroglobulin domain-containing protein 8	0.553325	1.04587	2.68943	-	-	O	-
4954	STGGAPTFNVTVTK	P07737	PFN1	Profilin-1	1.09946	0.758778	0.957935	-	-	-	-
4965	STQGFLNGSEVSELLR	Q9HCM3	KIAA1549	UPF0606 protein KIAA1549	1.46754	1.51173	0.427294	-	-	O	-
4973	SVEFTFCNDTVVIPCFVTNMEAQNTTEVYVK	Q08722	CD47	Leukocyte surface antigen CD47	4.27552	2.47007	0.346013	O	O	O	-
4977	SVHGGVPQNVSLWAHR	Q12891	HYAL2	Hyaluronidase-2	1.00187	1.60648	9.08697	-	-	O	↑
4978	SVHNVTGAQVGLSCEVR	Q8WX77	IGFBPL1	Insulin-like growth factor-binding protein-like 1	1.76933	0.530454	5.99891	-	-	O	-
4996	SVTIQPLLQSSQNQSFNASSGLLSPSPDHQDLGR	Q9HCN3	TMEM8A	Transmembrane protein 8A	2.10249	1.79117	1.78819	O	-	-	↑
5009	SWVQGNLTACGR	Q8N2E6	TOR2A	Prosalusin;Salusin-alpha;Salusin-beta;Torsin-2A	1.4207	0.705589	2.5238	-	-	O	-
5015	SYFSSLNLTIR	P56199	ITGA1	Integrin alpha-1	0.50712	0.722691	0.342981	-	-	O	↓
5018	SYNVTSVLFR	P80188	LCN2	Neutrophil gelatinase-associated lipocalin	0.866037	2.68105	3.04343	-	O	O	-
5022	SYSTTYEERNITGTR	Q15758	SLC1A5	Neutral amino acid transporter B(0)	1.13753	1.36226	10.693	-	-	O	↑
5036	TADINSSEVEVLYLR	P22455	FGFR4	Fibroblast growth factor receptor 4	13.4478	0.225813	2.21714	O	O	O	-
5037	TADLQWNSSNAQLLLDYCSSK	Q9Y251	HPSE	Heparanase;Heparanase 8 kDa subunit;Heparanase 50 kDa subunit	0.316308	0.229736	3.73964	O	O	O	-
5042	TAGANGTSGFFCVDEGR	P05981	HPN	Serine protease hepsin;Serine protease hepsin non-catalytic chain;Serine protease hepsin catalytic chain	5.10708	0.232927	0.940044	O	O	-	-
5043	TAGTCLYFSAVPGILPSSQPPISCSEEGAGNATLSPR	Q86XT9	TMEM219	Insulin-like growth factor-binding protein 3 receptor	3.67132	0.609395	23.2426	O	-	O	-
5046	TALFPDLLAQGNASLR	Q5ZPR3	CD276	CD276 antigen	1.62721	0.872968	1.78386	-	-	-	-
5050	TALSSENCSFQYQLR	Q9UJ42	GPR160	Probable G-protein coupled receptor 160	0.786326	0.532997	1.33284	-	-	-	-
5053	TANDTSTEAYNLLLR	P11047	LAMC1	Laminin subunit gamma-1	0.116532	0.743188	9.52289	O	-	O	-
5054	TASCSNVTCWLK	P17301	ITGA2	Integrin alpha-2	1.36169	0.848714	1.92159	-	-	-	-
5055	TASVSINQTEPPK	P29317	EPHA2	Ephrin type-A receptor 2	1.40085	0.776038	1.87813	-	-	-	-
5061	TAVFADQVIVGNASLR	Q7Z7D3	VTCN1	V-set domain-containing T-cell activation inhibitor 1	3.05739	0.663354	2.95468	O	-	O	-
5062	TAVNCSSDFDACLITK	P13987	CD59	CD59 glycoprotein	2.1348	0.913135	2.16986	O	-	O	-
[truncated: 277 more rows]

## Sheet: @ Cut-off significant
@ cut-off criteria 1) up/down : "↑" or "↓" (consistently up or down regulation after treatment analog) 2) having "O" at least one cell condition
[truncated: 265 more rows]
